# Supplementary material for: In vitro inhibitory effect of five natural sweeteners on α-glucosidase and α-amylase
Source: Royal Society of Chemistry journal article supplement (doi:10.1039/d3fo05234f), 2024-01-01
Supplement: d3fo05234f1.zip [file -amylase.xlsx]

## Sheet: CR
	Wavelength/nm	0	20	25	30	35	40	45	50	55	60
	300	844.633	547.633	497.367	443.333	405.267	380.7	336.333	300.9	276.633	252.867
	301	861.767	558.867	503.7	452.1	412.167	387.2	343.733	307	282.467	257.767
	302	888.6	575.833	519.667	464.867	424.1	397.467	353.967	315.067	290.533	264.533
	303	918	591.3	536.2	479.633	436.9	410	365.2	323.933	299.4	272.967
	304	949.467	613.1	552.067	493.8	448.9	422.233	376.067	333.433	308.5	281.533
	305	978.9	629.7	567.767	508.1	462.367	434.9	386.033	343.067	316.667	289.233
	306	1009	647.733	584.233	522.533	475	445.233	395.7	352.867	324.9	296.367
	307	1036.33	661.4	596.667	533.567	486.367	455.1	405.267	360.067	332.5	302.5
	308	1063	676.633	611.067	544.667	496.8	464.633	412.433	366.8	338.833	308.7
	309	1087.33	691.833	624	556.967	505.9	474.533	421.9	374.367	345.433	314.7
	310	1111.67	706.467	636.133	567.133	515.433	483.433	429.3	380.667	351.267	321.3
	311	1138.67	719.5	647.367	577.433	524.467	491.233	436.1	387.5	357.167	325.267
	312	1162	732.167	657.233	586.167	532.8	498.233	442.667	392.6	362.233	330.933
	313	1184	740.6	667.167	595	540.667	504.933	449.133	397.6	366.3	335.933
	314	1203	752.9	677.5	602.933	547.833	511.967	453.033	401.9	370.667	338.233
	315	1223.33	763.433	685.233	611.1	553.3	517.667	458.3	406.733	373.9	343.467
	316	1241.33	771.7	692.667	617.233	559.633	522.633	462.833	410	377.167	345.233
	317	1258	781.967	700.767	621.967	563.633	527.6	466.467	413.4	380.233	347.967
	318	1276.33	786.6	708.133	627.333	567.333	531.067	469.8	415.8	382.567	350.633
	319	1293.67	796.533	714.333	633.433	574.2	536.033	473.133	418.833	385.633	352.433
	320	1310.67	806.6	720.1	639.133	577.833	540.8	477.633	421.233	388.533	355.2
	321	1327.33	813.267	728.333	643.967	583.833	543.967	481.7	424	390.467	357.967
	322	1344.67	823.333	735.2	651.167	588.267	548.833	487	428.267	395.567	361.067
	323	1363	830.8	741.6	657.633	593.467	554.933	490.2	431.2	397.967	363.3
	324	1380.67	841.3	751.9	664.8	599.2	560.967	494.733	434.4	400.8	366.967
	325	1399.67	852.167	759.833	672.567	604.733	565.5	499.967	438.133	404.567	370.3
	326	1416	863.633	769.7	681.067	613.433	573.067	506.167	443.9	409	373.767
	327	1436	873.6	777.967	688.9	621.733	580.8	511.2	448.567	413.6	377.4
	328	1455	884.367	789.167	698.533	627.733	586.8	516.933	454.333	418.433	381.367
	329	1475.33	895.4	797.6	704.733	635.067	593.9	523.233	459.267	423.2	385.433
	330	1496.67	906.467	809	713.967	643.4	600.433	529.3	464.333	426.633	389.367
	331	1512.33	917.2	817.267	721.833	649.867	607.533	534.6	470.067	432.833	394.933
	332	1529	928.467	825.267	729.333	657.767	615.1	540.5	475	437.467	398.8
	333	1543.33	939.3	836.867	736.633	663.5	620.4	545.567	479.2	441.967	402.767
	334	1554.33	944.167	842.967	743.733	670.433	625	551.567	483.333	445.467	406.467
	335	1566.67	952.333	847.633	750.8	673.067	628.767	555.267	486.767	448.167	409.833
	336	1575	959.967	853.2	755.8	678.967	634.633	558.9	489.333	452.367	412.533
	337	1583.33	964.433	859.267	760.467	684.667	638.967	562.867	493.8	455.167	414.533
	338	1585.67	966.867	862.1	762.633	686.067	641.733	565.367	496.533	456.8	416.833
	339	1590.67	972.267	865.467	765.867	688.433	645.533	566.967	497.967	459.167	418.333
	340	1591.33	971.7	865.967	768.333	689.633	646.233	568.5	499.233	460.3	420.033
	341	1589.67	970.833	867.3	767.667	688.933	646.8	568.933	499.967	461.167	421.6
	342	1583	971.067	866.433	767.667	689.433	647.067	568.467	499.8	460.5	421.6
	343	1581.33	969.433	865.2	766.367	689.8	646.267	568.667	499.167	462.667	420.5
	344	1574	967.233	863.633	764.233	688.033	644.367	568.3	499.167	461.067	420.4
	345	1566.33	961.533	858.4	762.867	686.433	643.033	567.3	497.567	460.167	420.233
	346	1557	955.233	855.2	757.8	682.433	639.867	564.1	497	458.5	418.733
	347	1542	951.333	849.467	754.4	678.567	636.333	561.633	493.567	457.1	416.833
	348	1529	945.433	845.467	748.7	674.467	633.467	558.667	491.433	454.467	414.5
	349	1513.67	939.767	837.767	743.2	669.7	629.933	554.767	487.7	450.667	411.967
	350	1496.67	930.833	833.167	738.667	666.567	624.533	551.433	485.333	448.767	409.2
	351	1482.67	921.8	824.033	731.633	659.633	620.133	546.633	480.867	445.6	407.133
	352	1464	910.867	816.367	723.033	654.367	612.333	541.3	476.533	442.133	403.733
	353	1447	901.6	806.967	715.8	647.2	608.267	537.133	472.767	438.8	400.7
	354	1424	890.633	797.8	707.533	641.433	601.833	531.033	467.9	432.967	396.867
	355	1404	877.267	786.133	700.633	633.733	594.1	525.467	463.9	428.833	392.633
	356	1379.33	866.233	776.633	690.433	625.333	587.267	518.5	458.6	425.5	389.2
	357	1355.67	853.933	766.367	682.133	618.033	579.833	512.567	453.133	420.733	384.9
	358	1333	842.033	754.2	674.1	610.633	572.067	507.233	447.8	415.233	379.633
	359	1311	828.8	744.1	664.3	600.333	564.7	500.2	442.133	409.833	375.9
	360	1283	813.333	731.333	653.867	589.9	556.467	492.4	435.733	404.767	371.333
	361	1258	798.767	719.7	642.867	580.3	546.833	485.233	429.7	398.2	366.533
	362	1231.33	783.8	706.933	631.067	570.867	537.867	477.4	422.533	392.3	360.5
	363	1204.67	769.133	693.2	618.333	561.533	528.867	470.4	416.233	387.167	355
	364	1179	753.067	678.867	607.133	551.767	520	462.2	410.367	379.933	349.3
	365	1149.67	736.567	665.7	595.5	540.8	508.267	451.633	401.433	373.867	343.067
	366	1122	721.9	650.7	583.7	528.8	498.933	443.467	393.833	367.733	337.367
	367	1093	705.867	635.733	572.267	517.4	489.5	434.667	387.167	359.267	330.733
	368	1066.33	690.767	622.867	558.533	506.167	479.533	425.667	380	352.833	324.8
	369	1039.33	672.033	607.3	545.3	497.333	468.4	417.267	372.233	345.967	318.133
	370	1010.67	655.3	592.667	532.233	485.133	458.1	407.4	364.1	338.767	311.9
	371	980.7	639.067	578.233	519.433	473.167	446.8	398.4	355.533	332.333	305.4
	372	954.6	622.867	564.1	506.4	461.333	436.8	390.233	348.233	324.6	298.567
	373	929.167	606.567	548.533	493.167	451.167	425.933	381.6	341.4	317.8	292.067
	374	899.2	590.033	534.167	482.3	441	415.6	372.467	332.2	311.033	285.267
	375	871.567	573.367	520.067	468.967	428.033	405.467	362.5	324.233	302.633	279.533
	376	844.533	556	507.233	455.167	416.7	395.2	353.4	316.2	295.333	273
	377	818.5	541.333	493.1	443.633	405.9	385.567	344.767	308.1	288.433	266.633
	378	790.133	525.933	478.233	431.2	395.167	375.5	336.567	300.933	282.067	259.567
	379	765.333	509.367	465.533	418.567	383.433	365.7	327.6	293.4	274.633	254.2
	380	739.7	494.233	450.5	405.9	373.633	354.333	318.233	285.433	267.067	247.567
	381	713.933	478.267	436.467	395.6	362.267	343.867	309	277.667	260.233	241.3
	382	690.033	463.3	423.1	384.033	352.433	334.6	300.067	271.067	254.3	235.167
	383	666.633	449.633	410.4	372.267	342.467	325.2	292.333	263.567	248.2	228.9
	384	644.267	435.633	398.3	361.833	332.6	316.067	284.267	256.733	240.233	222.6
	385	620.867	420.567	385.7	350.967	323.333	306.033	276.033	249.367	233.9	216.767
	386	596.833	407.033	372.867	339.2	312.167	296.9	267.967	242.433	227.933	211.633
	387	574.9	394.1	360.367	328.6	301.7	287.7	260.133	235.6	221.5	205.7
	388	554.2	380.367	349.333	317.5	292.7	278.533	252.3	228.733	215	200.167
	389	534.367	368.667	338.233	307.933	284.533	270.567	245.167	221.833	208.9	195.067
	390	514.233	355.8	326.8	297.067	275.267	262.733	237.4	215.733	203.167	189.733
	391	494.733	344.4	315.267	288.567	266.933	254.5	230.433	209.533	197.5	184.4
	392	475	332	304.533	278.533	258.1	246.033	223.167	203.333	191.667	179.033
	393	457.933	320.067	295	269.833	250.133	239.367	217.433	197.867	186.667	174.2
	394	441.467	310.033	285.1	260.9	241.833	231.233	210.533	192.2	181.7	169.667
	395	422.433	299.9	275	252.733	234.5	224.067	204.767	186.1	176.5	165.133
	396	406.4	288.6	265.633	244.433	227.1	216.2	198.267	181.067	171.3	160.5
	397	391.167	278.267	257.5	237.667	219.533	209.7	191.967	175.733	166.033	155.5
	398	376.667	268.7	248.9	229.567	212.6	203.9	186.833	170.833	162.167	152.133
	399	361.067	259.7	241	221.6	206.5	198.067	181.367	166.133	157.6	147.833
	400	347.467	251	231.8	214.133	199.8	192.433	175.567	161.667	152.8	143.4
	401	332.4	241.9	224.733	207.8	194.5	186.267	170.567	157.267	149	140.233
	402	319.267	232.933	217.167	200	187.5	180.6	165.433	152.967	144.933	136.033
	403	305.4	225.6	210.033	193.9	181.367	174.8	160.967	148.6	141.767	132.633
	404	293.267	217.633	202.3	186.933	176.033	169.533	156.267	144.4	137.667	129.5
	405	281	209.3	195.433	181.433	169.767	163.867	151.733	140.333	133.033	125.867
	406	269.7	202.033	188.867	175.5	164.367	159.567	147.067	136.367	129.8	122.4
	407	257.267	194.9	182.433	169.933	159.267	154.367	142.567	133	126.8	119.167
	408	246.9	188.133	176.7	164.4	154.533	149.5	138.733	129.2	122.9	116.067
	409	237.167	182.167	170.067	159	149.867	145.667	134.867	125.433	120.133	113.567
	410	227.1	175.5	165.167	154.067	145.6	141.067	131.233	122	117.033	110.733
	411	216.867	169	159.133	149.433	141	136.7	126.833	118.967	113.833	108.233
	412	208.433	163.233	154.033	144.367	136.9	132.6	123.333	115.533	111.067	105.667
	413	199.467	157.733	149.4	140.433	132.667	128.967	120.067	112.967	108.333	103
	414	191.567	153.467	144.833	135.933	129.067	125.367	117.2	110.1	105.8	100.833
	415	183.5	147.267	139.667	131.667	124.933	122.3	114.333	107.5	102.833	98.29
	416	175.4	142.1	135.333	127.6	121.5	118.733	110.967	105.133	101.033	96.34
	417	167.833	138.533	131.033	124.333	118.7	115.167	108.433	102.733	98.6867	94.04
	418	161.667	133.7	127.467	120.6	114.433	112.167	105.433	99.6767	96.1833	91.8267
	419	154.733	129.1	123.333	116.6	111.4	109.533	103.2	97.6033	94.34	90.4033
	420	147.967	124.7	119.3	113.5	109	106.467	100.733	95.74	92.3533	88.5667
	421	141.233	120.667	115.367	110.467	106.133	103.533	98.4533	93.7567	89.98	86.3867
	422	135.6	117.367	112.533	107.5	103.567	100.967	95.97	91.72	88.34	85.08
	423	130.4	114.1	109.633	104.867	101.033	98.7267	93.8067	90.41	87.1933	83.27
	424	125.1	110.6	105.967	102.367	98.5167	96.9533	91.7567	88.1233	84.97	82.3867
	425	120.1	107.233	103.367	99.3733	96.2567	94.7733	90.04	86.6633	84.1467	80.98
	426	114.367	104.433	100.767	97.25	93.82	92.79	88.6267	85.2667	82.5667	79.23
	427	109.867	101.233	98.0433	94.9067	91.8333	90.8333	87.02	83.6333	80.91	78.27
	428	105.567	98.4467	96.0367	93.0267	90.26	89.2167	85.4	82.2533	80.1167	77.1867
	429	101.633	96.09	93.4533	90.8867	88.5033	87.38	83.9	81.0367	78.86	76.2567
	430	97.24	93.66	91.52	89.1933	86.8833	86.2267	82.8667	80.08	77.6967	75.2633
	431	93.34	91.3367	89.6267	87.2433	85.53	84.3133	81.2167	78.8367	76.6433	74.3267
	432	90.0767	89.1833	88.06	85.59	83.7033	82.9333	79.87	77.96	75.8067	73.5067
	433	86.8167	86.41	85.7267	84.1867	81.9867	81.4533	78.4933	77	74.7467	72.96
	434	83.1433	84.9633	83.81	82.8133	80.67	80.7367	77.8867	76.4033	74.4767	72.12
	435	80.1667	82.7433	82.25	80.8233	79.42	79.2833	76.79	75.16	73.4867	71.55
	436	76.9733	81.3067	80.2433	79.7433	78.7033	77.9767	76.0633	74.4567	72.94	70.82
	437	74.3467	79.5033	79.0267	78.3967	76.91	76.5967	75.2433	73.78	72.1667	70.6233
	438	71.3633	77.9967	78.05	77.46	75.7167	75.5767	74.0467	72.8733	71.3267	69.7333
	439	68.7567	76.5167	76.5533	75.95	75.2467	74.98	73.4267	71.96	70.8767	69.0467
	440	65.86	74.82	75.1367	74.8967	74.4133	74.3167	72.9233	71.4867	70.2133	68.93
	441	63.53	73.87	74.0233	73.72	73.4533	72.8733	72.0033	70.81	69.6733	67.88
	442	60.8967	72.1567	72.32	72.6233	72.7533	72.3267	70.8	70.2533	69.13	67.8467
	443	58.26	70.58	71.16	72.0267	71.46	71.33	70.1567	70.0567	68.2567	67.22
	444	56.3167	69.6	70.0667	70.7333	70.7967	70.52	70.0267	68.79	68.0433	67.02
	445	54.3233	68.1833	69.1267	69.96	69.82	69.9533	69.0567	68.43	67.7333	66.3833
	446	52.32	67.0533	68.25	69.0133	68.8833	69.72	68.4233	67.48	67.1633	65.67
	447	50.0133	65.9433	67.21	68.1267	68.29	68.58	67.8933	67.2233	66.6333	64.9833
	448	48.3333	64.6167	66.35	67.49	67.2633	68.0967	67.5067	66.8733	65.7767	64.96
	449	47.0733	63.4967	65.0933	66.4633	66.89	67.21	67.03	66.3567	65.77	64.96
	450	44.9167	62.0033	64.31	65.3467	66.13	66.2	66.4733	66.11	65.2833	64.3333
	451	43.1233	61.5367	63.42	64.7067	65.6	65.9433	65.7867	65.4867	64.88	63.7767
	452	41.5767	60.3967	62.3767	63.8333	64.24	65.0467	65.12	65.0867	64.3733	63.5233
	453	39.8433	59.0767	61.8167	63.34	63.84	64.6967	64.86	64.6033	63.82	63.2433
	454	38.32	58.7967	61.2033	62.74	63.49	64.1833	64.2067	64.0667	63.4767	62.97
	455	37.1967	58.0167	60.1433	62.17	63.1667	63.5867	63.56	63.8933	62.9733	62.7733
	456	35.6067	57.2233	59.0667	61.31	62.0333	63.0633	63.15	63.3633	62.9167	62.2667
	457	34.49	56.3067	58.4267	60.4433	61.61	62.0433	62.3933	62.9967	62.45	62.2167
	458	33.1633	55.56	57.61	59.76	60.91	62.08	62.2667	62.41	62.1367	61.4767
	459	31.82	54.3167	57.0933	59.0967	60.3233	61.35	61.5833	62.1967	61.5067	61.1133
	460	30.8533	53.79	56.63	58.7467	59.86	60.9467	61.3767	61.7833	60.91	60.69
	461	29.9333	52.9933	55.9	58.11	59.5233	60.39	61.22	61.3233	60.5033	60.5967
	462	28.7967	52.2133	55.3367	57.5767	58.7567	59.8467	60.4533	61.0967	60.49	60.3933
	463	27.8	51.7533	54.8433	56.86	58.29	59.4133	59.7867	60.2333	59.8233	59.52
	464	26.95	50.96	53.99	56.3067	58.0533	58.6667	59.5267	59.8967	59.56	59.37
	465	25.9233	50.0267	53.44	55.88	57.15	58.2467	58.9733	59.7033	59.2367	58.8833
	466	25.15	49.32	52.6233	55.0033	56.7133	57.9033	58.0833	59.2467	58.8	58.4667
	467	24.3867	48.7167	51.7733	54.6933	55.8867	57.3867	57.9733	58.4967	58.33	58.3433
	468	23.4533	48.3	51.1867	53.8267	55.27	56.6133	57.24	58.1233	57.89	57.5867
	469	22.67	47.29	50.59	53.2267	54.8033	55.8	56.86	57.3733	57.29	57.0733
	470	22.16	46.9233	50.33	52.4467	54.1933	55.29	56.2067	57.11	56.64	56.5833
	471	21.2533	46.3833	49.4633	51.9633	54.05	54.89	55.64	56.4733	56.3033	56.0867
	472	20.51	45.6067	48.6633	51.4533	53.2733	54.43	54.9033	55.72	55.7733	55.66
	473	19.8667	45.0033	48.3733	50.8267	52.6367	53.8767	54.55	55.6133	55.5433	54.8367
	474	19.32	44.1167	47.5733	50.3067	52.1033	52.98	54.0067	54.91	54.8367	54.5767
	475	18.74	43.7667	47.2533	49.7	51.7733	52.9367	53.48	54.7267	54.3533	53.75
	476	18.25	42.8033	46.84	49.1067	51.1733	52.4033	53.4667	54.1767	53.9433	54.0733
	477	17.7133	42.8167	46.1267	48.6	51.0833	51.8233	52.4767	53.5533	53.75	53.5567
	478	17.2767	41.93	45.6467	48.0933	50.2533	51.11	52.4033	53.13	53.03	53.0967
	479	16.87	41.5133	45.1133	47.6167	49.7367	50.5767	51.6933	52.72	52.5767	52.8067
	480	16.2033	40.88	44.6667	47.3267	49.0333	50.5	51.4133	52.1267	52.3867	52.22
	481	15.7667	40.5467	44.19	46.87	48.8533	49.9067	51.62	51.8567	51.8	52.0133
	482	15.35	40.1933	43.79	46.4433	47.9167	49.49	50.55	51.3333	50.9867	51.5567
	483	15.0067	40.19	43.44	46.1767	47.7533	48.98	49.99	51.42	51.0933	51.1367
	484	14.7133	39.55	43.06	45.5633	47.82	48.52	49.84	50.8567	50.86	50.7333
	485	14.1333	39.26	42.8333	45.1533	47.0967	48.56	49.6467	50.41	50.5033	50.3567
	486	13.94	38.8533	42.3433	45.1633	46.9	47.7367	49.1067	49.8067	49.9867	50.0467
	487	13.7433	38.2633	41.8967	44.3167	46.58	47.5967	48.6067	49.5467	49.5133	49.8467
	488	13.49	38.2667	41.6867	44.1467	45.75	47.2433	48.46	49.2467	49.75	49.68
	489	13.1933	37.7467	41.0633	43.7133	45.7733	46.7033	48.1333	48.8867	49.5633	49.4533
	490	12.72	37.3467	40.6033	43.4467	45.3133	46.13	47.6367	48.55	48.69	48.5167
	491	12.6233	36.9667	40.6567	43.24	44.8533	45.9567	47.2333	48.1333	48.2467	48.0467
	492	12.4167	36.39	39.9	42.59	44.46	45.6533	46.5967	47.62	48.2333	47.92
	493	12.0633	36.02	39.6267	42.2167	43.83	45.18	46.2667	47.3133	47.55	47.6967
	494	12.0433	35.7433	39.3367	41.7567	43.5067	44.5033	45.9833	46.9833	46.91	47.1
	495	11.5333	35.1833	38.5733	41.32	43.24	44.31	45.7733	46.66	46.3333	46.54
	496	11.27	34.73	38.1067	41.1333	42.7633	43.67	45.0567	45.9967	46.06	46.0367
	497	11.0633	34.3533	37.9567	40.3667	42.2767	43.4367	44.4933	45.15	45.6667	45.3633
	498	10.9267	33.9733	37.4667	40.0433	41.7233	42.6933	44	45.1233	45.1233	45.0667
	499	10.6033	33.6933	36.8433	39.5033	41.3133	42.1833	43.44	44.5567	44.55	44.6167
	500	10.44	33.1367	36.32	38.84	40.8533	41.72	43.0533	44.0133	43.8033	43.9767
	CR浓度µg/ml	荧光强度	最大发射波长		F0/F	Ln(F0/F)
	20	339	971.7		1.63768	0.49328
	25	341	867.3		1.83481	0.606943
	30	340	768.333		2.07115	0.728104
	35	340	689.633		2.30751	0.836167
	40	341	646.8		2.46032	0.90029
	45	341	568.933		2.79705	1.02856
	50	341	499.967		3.18288	1.15779
	55	341	461.167		3.45067	1.23857
	60	341	421.6		3.77451	1.32827

## Sheet: CT
	Wavelength/nm	0	10	20	30	40	50	60	70	80	90	100
	300	815.733	596.267	372.3	238.967	176.267	127.267	89.07	62.3933	43.3533	34.2267	27.5233
	301	834.067	609.667	380.5	245.033	179.633	130.3	92.1733	63.57	44.51	35.5433	28.8367
	302	858.033	629.3	392	253.967	186.867	135.067	96.0467	66.25	46.3467	36.9067	30.2
	303	889.1	651.1	408.467	263.933	194.267	141.2	100.087	69.5867	48.9	38.7933	31.4867
	304	923.033	673.733	424.033	274.6	202.167	147.7	104.733	72.75	51.2933	40.5167	33.4733
	305	953.3	697.533	439.667	285.133	210.533	153.667	109.233	76.3567	53.3867	42.5	34.5667
	306	980.767	718.9	453.6	295.333	218.667	160.2	113.533	79.9633	55.82	44.3533	36.2167
	307	1008.07	738.533	466.6	305.8	225.267	165.467	117.633	82.2333	57.6733	46.2067	37.9167
	308	1035.67	760.833	479.2	313.467	232.2	170.2	121.4	84.8067	59.6567	47.9567	39.14
	309	1063.33	777.967	492.133	322.067	238.533	175.633	124.933	87.8467	62.1033	49.4933	40.73
	310	1089	797.3	504.267	330.367	244.733	180.7	128.067	90.29	63.9133	51.24	41.8033
	311	1115.33	815.9	515.233	339	251.667	184.833	131	92.57	66.03	52.6	42.8967
	312	1140.67	832.367	527.033	347.1	256.3	188.333	134.4	95.0633	67.38	53.6267	43.9467
	313	1164.67	846.767	536.633	353.1	260.767	193.133	136.567	96.7767	68.89	54.65	45.0033
	314	1186	861.733	545.633	358.367	265.3	196.8	139.533	98.19	69.73	55.6	46.45
	315	1207.67	874.167	554.033	364.5	269.567	199.6	141.7	100.133	71.1333	56.7733	46.56
	316	1228	888.8	563.033	368.4	273.367	202.2	144.067	101.5	72.1233	57.4433	47.3867
	317	1246	897.6	570.233	373.8	276.733	204.833	145.367	103	72.7833	57.9967	47.9467
	318	1263	913.567	576.6	377.633	279.467	206.967	146.667	104.233	73.7167	58.6233	48.44
	319	1280	924.833	581.667	381.5	282.633	209.567	148.1	104.867	74.21	59.21	48.9467
	320	1297	934.267	589.867	385.9	285.667	211.233	149.667	105.833	74.93	59.9233	49.4367
	321	1314.33	946.7	596.5	390.1	288.233	213.167	150.867	107	75.52	60.4867	49.6367
	322	1334.33	959.733	602.467	392.6	290.933	214.5	151.533	107.267	76.14	60.6267	50.0567
	323	1351	971.5	609.033	396.433	292.967	217.067	153.633	108.367	76.4733	60.6367	50.3467
	324	1371.67	982.467	616.467	400.733	296.067	218.133	154.3	109.2	76.7667	61.22	50.61
	325	1393.33	996.5	624.167	404.6	298.533	220.533	155.533	109.567	77.3267	61.5333	50.6867
	326	1410	1008.33	628.433	409.433	302.233	222.5	157.167	110.267	77.84	61.85	51.3567
	327	1430.67	1019.33	637.267	413.733	304.733	224.767	157.767	111.333	78.08	62.3833	51.4
	328	1452.33	1032	644.7	418.133	307.8	226.967	159.033	112.433	78.7333	62.6867	51.4733
	329	1467.33	1044	652.733	422.8	310.867	228.033	159.967	113.1	79.2	63.0333	52.2
	330	1486.67	1059.67	659.1	426.7	313.767	230.233	162.033	113.867	80.16	63.4233	52.2867
	331	1505.33	1069.33	665.8	430.667	317.333	232.033	162.433	114.9	79.7767	64.0233	52.61
	332	1519	1081.33	674.067	433.967	320.2	234.467	163.4	115.733	81.0867	64.4333	52.7367
	333	1532	1089.67	679.167	436.933	321.367	235.667	164.833	116.3	81.1133	64.8733	53.18
	334	1544	1099.33	683.233	440.667	324.833	236.333	165.567	116.633	81.9233	65.01	53.21
	335	1555.33	1106	689.3	443	326.167	237.933	167.2	117.433	82.0767	65.0333	53.6733
	336	1569	1112	692	444.833	327.7	239.167	167.7	117.333	82.67	65.2633	53.39
	337	1574.33	1115.67	693.467	446.3	328.8	239.8	167.767	117.533	83.06	65.4233	53.6533
	338	1578.67	1118.67	696.7	447.2	329.433	239.633	167.8	117.867	82.8233	65.5133	54.06
	339	1582	1120	698.767	447.933	329.567	240.733	168.3	117.7	82.7167	65.5667	53.8467
	340	1580.67	1120.67	696.8	447.5	329.533	240	168.933	117.933	82.6367	65.1433	53.7733
	341	1576.33	1121.67	696.5	448.2	329.833	239.867	168.433	118.3	82.6433	65.5067	53.8433
	342	1573.67	1117.33	695.1	447.5	328.967	240	167.733	118.267	82.7633	65.1767	53.5867
	343	1568	1114.33	694.2	445.7	328.1	238.967	167.133	117.7	82.2733	65.3967	53.34
	344	1563	1110	691.267	443.4	326.867	238.167	166.833	117.4	82.4767	64.9267	53.43
	345	1554.67	1105	686.567	441.667	324.633	236.467	165.8	116.467	82.0767	64.57	53.4467
	346	1539.67	1095	683.567	439.033	322.633	235.667	165.5	116.367	81.45	64.56	53.09
	347	1529.67	1087.33	676.8	436.933	321.2	234.467	164.633	115.567	80.7433	64.48	53.0433
	348	1514.67	1079.67	673.667	433	318.233	232.367	163.367	114.6	80.7167	63.97	52.4967
	349	1503.33	1071	666.8	430.733	316.3	230.867	161.933	113.767	79.8933	63.46	52.3067
	350	1487	1061	660.767	425.633	312.867	228.3	160.733	113.333	79.4067	62.9	51.8933
	351	1467.67	1045	654.567	420.5	310.1	225.833	159.367	112.1	78.7767	62.6567	51.49
	352	1447.67	1032	646.1	416.733	306.6	224.4	157.933	111.033	78.3367	62	51.5
	353	1434	1020.33	636.9	410.3	303.2	221.067	155.9	109.9	77.41	61.4733	50.3033
	354	1408.67	1008.67	630.367	405.5	299.067	218.067	153.933	108.667	76.5233	61.1667	49.75
	355	1388.33	991	619.633	400.233	294.267	214.833	151.733	107.233	75.4233	60.1567	49.3933
	356	1366	976.967	610.1	394.067	290.033	211.6	149.833	105.767	75.2567	59.7567	48.6567
	357	1343	961.667	600.533	388.633	285.533	209.167	148.733	104.167	73.79	58.98	48.27
	358	1319.33	944.933	590.933	382.233	281.8	205.667	145.367	103.033	73.0433	58.1033	47.5533
	359	1296.67	927.633	580.8	376.633	277.2	202.433	143.333	101.333	72.2233	57.0333	47.02
	360	1270	909.267	569.233	369.4	272.567	199.033	140.9	99.71	70.74	56.1167	46.2367
	361	1243.33	891.967	559.5	362.433	267.5	195.533	138.833	98.2433	69.8067	55.4167	45.3933
	362	1214.67	871.433	547.7	354.733	262.767	191.6	135.833	96.5333	68.1633	54.4033	44.64
	363	1189.33	854.8	537.8	348.733	256.9	188.8	133.167	94.6833	67.2167	53.3533	44.2367
	364	1161.33	836.333	525.833	340.133	251.267	184.367	131.1	93.22	66.0633	52.99	43.7933
	365	1132.67	817.667	512.867	332.8	245.7	180.233	127.9	90.4433	65.2567	51.74	42.3833
	366	1108	797.567	501.767	325.767	240.8	177.067	125.2	88.64	63.6867	51.0033	41.65
	367	1084.67	775.433	490.4	317.5	235.567	172.733	122.667	87.1967	62.1033	49.5933	41.04
	368	1053.33	756.033	477.7	309.9	229.833	168.3	120.3	85.0633	61.02	48.9067	40.2567
	369	1025	738.1	466.333	303.067	223.933	164.5	117.4	83.53	59.62	47.8233	39.4667
	370	997.733	718.467	453.433	294.233	218.2	160.7	114.267	81.5767	58.5667	46.81	38.5
	371	967.5	698.467	441.233	285.567	212.367	156.2	111.467	79.18	57.1767	45.5333	37.7033
	372	941.467	678.933	428.233	278.5	207.033	152	108.6	77.2567	55.6967	44.68	37.1933
	373	913.2	659.067	416.367	271.267	201.2	147.733	106.267	75.7033	54.41	43.7533	36.17
	374	886.967	639.667	405.167	263.367	195.867	144.167	103.4	73.5267	53.2733	42.73	35.3133
	375	859.833	619.3	393.067	255.567	189.967	139.867	100.193	71.7533	51.7333	41.4933	34.3467
	376	830.367	601.6	380.567	247.8	184.733	136.133	97.3367	70.2267	50.44	40.6933	33.5967
	377	802.5	580.867	369.267	240.067	179.733	132	95.0167	67.6033	49.43	39.6533	32.4533
	378	779.167	564.233	358.9	233.267	174	128.567	92.4933	65.9267	48.17	38.61	31.9667
	379	753.633	546.033	347.667	226.633	168.533	124.733	89.7	64.33	46.93	37.65	31.2767
	380	727.467	527.767	336.033	218.6	163.133	120.4	86.43	62.4633	45.5167	36.4033	30.3267
	381	703.9	509.5	325.267	212.067	157.667	117	83.9367	60.8933	44.1933	35.5367	29.5533
	382	680.333	493.233	315.2	204.767	152.933	113.367	81.7367	59.0267	42.8733	34.86	28.9567
	383	655.433	476.9	303.867	198.567	148.4	110.1	79.3033	57.37	41.6667	33.78	27.9967
	384	632.7	460.933	292.8	192.5	143.5	106.733	76.4733	55.75	40.61	32.7	27.2933
	385	609.5	443.367	282.767	186.033	138.867	103	74.2733	54.16	39.6367	31.97	26.7067
	386	585.967	427.167	273.067	179.6	134.233	99.3833	72.1367	52.27	38.4667	31.06	25.8833
	387	565.2	413.333	263.3	173.2	130.233	96.6967	69.81	50.5767	37.2767	30.4133	25.1633
	388	545.033	396.733	254.1	167.4	125.767	93.3033	67.69	48.9167	36.18	29.37	24.5667
	389	524.867	383.767	244.867	161.367	121.333	90.5533	65.63	47.7633	35.1467	28.7367	23.86
	390	504.867	368.667	236.1	155.967	117.433	87.6467	63.6067	46.1833	33.8933	28.0133	23.21
	391	487.1	355.6	227.6	150.733	113.4	84.56	61.35	45.16	33.1333	27.2833	22.59
	392	467.067	341.667	219.433	145	109.333	81.48	59.4033	43.5933	32.2333	26.3267	21.9767
	393	449.767	329.067	211.9	139.633	105.933	78.7667	57.7167	42.2967	31.1933	25.7333	21.3533
	394	432.7	317.2	204.267	135	101.833	76.1567	55.6	40.7167	30.4833	24.94	20.8033
	395	415.067	304.467	196.433	129.6	98.2667	73.78	53.66	39.56	29.66	24.0667	20.1967
	396	398.933	292.667	189.133	125.2	94.8267	71.05	52.0467	38.0767	28.62	23.4633	19.6933
	397	383.2	281.133	181.5	120.5	91.1333	68.46	50.4267	36.9767	27.8433	22.7533	19.12
	398	369.833	271.767	175.033	116.167	88.28	66.47	48.5867	35.8933	27.0167	22.1433	18.5633
	399	356.6	260.5	168.333	112.7	84.95	64.24	47.3433	34.9167	26.2067	21.41	18.17
	400	340.833	250.233	162.133	108.2	81.6633	61.6767	45.5133	33.5367	25.42	20.95	17.46
	401	326.2	240.367	155.233	104	78.79	59.0267	43.93	32.3733	24.65	20.3733	16.9867
	402	312.167	230.467	149.433	99.3667	76.05	57.7833	42.3467	31.2633	23.8367	19.77	16.5167
	403	300.233	220.9	143.7	96.1567	73.0833	55.3933	41.0433	30.4433	23.1267	19.0367	16.0533
	404	287.733	211.8	138.2	92.3333	70.45	53.4567	39.5	29.71	22.3167	18.5067	15.5667
	405	275.1	203.667	132.7	88.6333	67.8767	51.88	38.3	28.4067	21.65	17.8033	15.05
	406	263.067	194.7	127.167	85.8167	65.19	49.8133	36.5867	27.5267	20.9867	17.25	14.6933
	407	252.533	186.467	122.633	82.1933	62.86	47.9033	35.45	26.5	20.35	16.8133	14.3233
	408	242.4	178.933	117.733	79.19	60.7067	46.1533	34.1533	25.8033	19.7733	16.5233	13.8367
	409	233.067	171.8	113.267	76.62	58.51	44.6133	33.2833	25.12	19.0467	15.86	13.4967
	410	222.367	164.467	108.733	73.2567	56.0167	42.7833	31.7667	24.19	18.43	15.3367	13.0633
	411	212.867	157.967	104.2	70.3533	53.8867	41.1867	30.9267	23.3367	18.0267	15.0667	12.79
	412	203.767	152.033	100.447	68.14	52.0367	39.97	30.1067	22.69	17.4833	14.58	12.3
	413	195.767	145.7	95.8433	65.3433	49.9933	38.8567	29.0733	21.88	17.08	14.3567	12.1233
	414	187.233	139.5	92.39	62.9033	48.4167	37.4467	27.7767	21.0667	16.71	13.9067	11.7033
	415	180.2	134.167	88.62	60.56	46.67	35.9533	26.95	20.3433	16.1133	13.2967	11.3133
	416	172	128	84.98	58.22	44.79	34.9	25.7633	19.86	15.5	13.05	11.12
	417	164.7	123.4	81.4367	56.06	43.1267	33.73	25.3167	19.1867	15.21	12.7967	10.8867
	418	158.067	117.833	78.4733	54.0367	42.0033	32.41	24.41	18.76	14.7267	12.3467	10.4933
	419	151.6	112.833	75.53	51.7567	40.02	31.25	23.9067	18.1	14.1867	11.86	10.3267
	420	144.867	108.167	72.27	49.89	38.5233	30.0633	22.8367	17.59	13.7467	11.6333	10.051
	421	138.367	104.067	69.7667	48.05	37.2833	29.13	21.95	17.02	13.3333	11.3333	9.56633
	422	132.333	99.8	66.9667	45.9867	36.08	28.2467	21.3633	16.5533	12.8867	10.8733	9.46933
	423	127.667	95.5733	64.35	44.3733	34.7767	27.25	20.6633	16.03	12.8633	10.68	9.29433
	424	121.967	91.93	61.8533	43.1367	33.6067	26.53	19.9533	15.5033	12.3467	10.4433	9.069
	425	116.8	88.37	59.7867	41.3567	32.4	25.64	19.4967	15.0533	11.9867	10.1967	8.87
	426	112.133	85.0333	57.03	39.6767	31.4133	24.8067	18.9433	14.6667	11.6	9.99467	8.625
	427	107.367	81.53	55.45	38.6233	30.19	23.7667	18.2667	14.13	11.37	9.65767	8.339
	428	103.033	78.4967	53.46	37.4067	29.4567	23.2433	17.8633	13.8667	11.1033	9.455	8.12867
	429	98.9933	75.53	51.0667	35.9067	28.4833	22.5333	17.3467	13.3933	10.7467	9.27933	7.903
	430	95.2267	72.57	49.26	34.63	27.4533	21.9167	16.9233	13.0767	10.5433	8.926	7.71833
	431	91.69	70.2367	47.3367	33.3967	26.4867	21.3467	16.4433	12.8333	10.3467	8.81433	7.52033
	432	88.0467	66.91	45.8667	32.5767	25.8733	20.43	15.8767	12.5433	10.2067	8.63533	7.49267
	433	84.2433	64.4867	44.0967	31.6967	25.03	19.9867	15.5033	12.1133	9.78733	8.41	7.31067
	434	81.2733	62.66	42.8033	30.38	24.2	19.3533	14.8933	11.9167	9.65033	8.24533	7.09833
	435	78.66	60.1033	41.3433	29.58	23.3867	18.81	14.7667	11.49	9.23667	7.94433	6.91167
	436	75.0267	57.9433	40.09	28.5967	22.7267	18.12	14.3167	11.2667	9.19333	7.887	6.885
	437	72.5233	55.92	38.5733	27.5133	22.17	17.74	13.7133	10.9533	8.984	7.71467	6.59433
	438	69.74	53.6167	37.2533	26.63	21.3633	17.26	13.56	10.56	8.78867	7.64633	6.422
	439	67.3533	51.71	36.0867	25.94	20.7767	16.7467	13.14	10.27	8.569	7.38467	6.36467
	440	64.65	49.6967	34.7367	25.01	20.0933	16.2467	12.87	10.0597	8.464	7.28267	6.23333
	441	61.7067	48.1333	33.5367	24.34	19.3233	15.8933	12.6233	9.93533	8.23167	7.07067	6.08967
	442	59.69	46.1733	32.01	23.63	18.82	15.3933	12.1033	9.60267	8.02733	6.79533	5.92667
	443	57.6867	44.7567	31.3633	22.5333	18.2433	15.1167	11.74	9.30233	7.76067	6.824	5.88067
	444	55.4633	42.89	30.1733	21.8767	17.81	14.6967	11.4767	9.17867	7.57733	6.66867	5.69733
	445	53.33	41.24	29.1667	21.2833	17.27	14.1767	11.1233	8.87033	7.381	6.429	5.602
	446	50.9033	39.95	28.1367	20.7067	16.6167	13.8	10.8333	8.70433	7.27833	6.28467	5.40933
	447	48.86	38.2233	27.39	20.1333	16.1833	13.35	10.46	8.591	7.05567	6.226	5.26933
	448	46.8733	37.0733	26.2233	19.63	15.62	13.0367	10.18	8.31233	6.91633	5.923	5.299
	449	45.55	35.6767	25.49	18.8667	15.25	12.65	9.842	8.015	6.78933	5.96767	5.156
	450	43.7333	34.3367	24.4433	18.33	14.9167	12.38	9.65067	8.08367	6.47867	5.82467	4.978
	451	42.1067	33.07	23.7133	17.6033	14.3833	11.8933	9.45867	7.81767	6.359	5.719	4.86333
	452	40.48	31.9233	22.78	17.0833	13.8667	11.8033	9.188	7.55833	6.28	5.524	4.71633
	453	38.9733	30.6733	22.0033	16.5367	13.6067	11.36	8.77	7.24133	6.056	5.35733	4.641
	454	37.4133	29.56	21.43	16.0533	13.1333	11.1667	8.618	7.28433	6.036	5.25333	4.58767
	455	36.1633	28.9033	20.6467	15.62	12.6767	10.7633	8.45333	7.13533	5.85067	5.125	4.48167
	456	35.0467	27.9333	19.8633	15.0967	12.41	10.4367	8.18067	6.802	5.773	5.033	4.33
	457	33.5967	26.78	19.3967	14.7133	12.02	10.069	8.09367	6.62267	5.65767	4.93833	4.29533
	458	32.3467	25.9633	18.9133	14.3067	11.7733	9.79	7.86967	6.51233	5.512	4.897	4.264
	459	31.3867	24.9267	18.54	13.8067	11.3133	9.622	7.59533	6.483	5.354	4.764	4.13567
	460	30.1433	24.29	17.8233	13.3433	11.0667	9.48367	7.49267	6.20467	5.29067	4.702	4.06233
	461	29.2967	23.56	17.05	12.99	10.68	9.30367	7.26933	5.98067	5.12167	4.58767	3.974
	462	28.1033	22.7333	16.5567	12.5867	10.5867	9.02933	7.153	5.975	5.05967	4.471	3.92
	463	27.1633	21.9167	16.01	12.2433	10.2833	8.56233	7.049	5.82267	4.90667	4.44833	3.911
	464	26.3933	21.1467	15.6267	12.1733	10.2233	8.534	6.916	5.72	4.923	4.42	3.81267
	465	25.2467	20.4433	15.13	11.7167	9.85967	8.366	6.80633	5.552	4.78433	4.291	3.83467
	466	24.3833	19.92	14.6367	11.3	9.35	8.10433	6.49367	5.49167	4.84233	4.188	3.685
	467	23.8233	19.2233	14.2233	10.98	9.19967	7.889	6.45233	5.34833	4.60933	4.02967	3.554
	468	22.9467	18.52	13.9767	10.71	9.03333	7.901	6.127	5.24933	4.555	4.114	3.58033
	469	22.1533	17.94	13.5	10.4867	8.72467	7.58833	6.064	5.21767	4.43733	4.02967	3.48933
	470	21.23	17.1867	13.1133	10.23	8.503	7.37233	5.96633	4.98167	4.42833	3.90933	3.308
	471	20.74	16.97	12.74	10.0473	8.339	7.24133	5.86867	4.92167	4.24933	3.79467	3.36133
	472	20.0267	16.2533	12.3567	9.56533	8.13333	7.127	5.71633	4.826	4.132	3.72267	3.26933
	473	19.2	16.0633	12.08	9.43433	7.864	6.89433	5.58433	4.697	4.11033	3.728	3.14633
	474	18.65	15.5767	11.5833	9.049	7.74633	6.788	5.425	4.674	4.05467	3.60567	3.18467
	475	18.1767	15.0267	11.34	8.96533	7.51767	6.51467	5.38133	4.51133	3.912	3.49567	3.12433
	476	17.6767	14.6033	11.0267	8.718	7.319	6.31733	5.23033	4.44933	3.919	3.491	3.00433
	477	17.0733	14.21	10.7633	8.519	7.129	6.272	5.068	4.34633	3.839	3.4	3.00367
	478	16.4933	13.75	10.4933	8.46267	7.05133	6.15667	4.981	4.32967	3.744	3.31233	2.85767
	479	16.0733	13.4433	10.2967	8.17133	6.989	5.96333	4.94	4.29733	3.69233	3.19633	2.85033
	480	15.8033	13.16	10.13	8.13433	6.75633	5.97133	4.884	4.171	3.59867	3.19833	2.843
	481	15.5067	12.8667	9.91867	7.84867	6.67767	5.86967	4.782	4.069	3.54733	3.21933	2.89167
	482	15.0667	12.68	9.739	7.68267	6.57067	5.74133	4.69967	4.05367	3.568	3.24333	2.81033
	483	14.55	12.1133	9.613	7.54733	6.52233	5.71	4.70933	4.08567	3.43367	3.10833	2.78967
	484	14.2467	11.99	9.35567	7.58833	6.37567	5.69167	4.72833	3.98633	3.452	3.15633	2.667
	485	13.9733	11.7567	9.095	7.45967	6.245	5.52733	4.59167	3.87667	3.447	3.07767	2.65933
	486	13.56	11.74	8.87267	7.44667	6.149	5.447	4.55167	3.84267	3.43367	3.07167	2.79867
	487	13.46	11.4167	8.887	7.214	6.224	5.43767	4.45333	3.81133	3.394	2.98767	2.67167
	488	13.1933	11.1067	8.68967	7.064	6.164	5.44867	4.43133	3.74333	3.40133	2.93367	2.63633
	489	12.8	11.08	8.657	7.02533	5.85867	5.36067	4.39467	3.73733	3.36067	2.98067	2.67833
	490	12.5233	10.84	8.45667	6.809	5.972	5.36967	4.41333	3.767	3.338	2.91933	2.618
	491	12.19	10.4033	8.456	6.79133	5.92233	5.338	4.34867	3.70467	3.276	2.96167	2.602
	492	11.9033	10.27	8.12567	6.79067	5.774	5.14433	4.37367	3.67333	3.31967	2.96233	2.595
	493	11.5767	10.152	8.05533	6.74567	5.77	5.09833	4.266	3.61967	3.20867	2.96267	2.60067
	494	11.52	9.98667	7.91	6.68	5.62167	5.04933	4.22033	3.64733	3.16433	2.92233	2.47367
	495	11.38	9.826	7.90233	6.69367	5.531	5.09033	4.274	3.58233	3.18167	2.90567	2.50067
	496	11.1733	9.63033	7.74967	6.46033	5.537	5.08733	4.177	3.58967	3.165	2.87867	2.51
	497	10.9267	9.42	7.62233	6.439	5.592	5.01533	4.083	3.541	3.16867	2.81533	2.52167
	498	10.7733	9.29467	7.56033	6.35067	5.44167	4.911	4.167	3.65367	3.09967	2.788	2.448
	499	10.4967	9.188	7.515	6.36867	5.501	4.96633	4.06533	3.59067	3.06633	2.887	2.493
	500	10.1833	9.21167	7.38467	6.17467	5.496	4.86033	4.146	3.55933	3.06633	2.84633	2.481
	CT浓度µg/ml	荧光强度	最大发射波长		F0/F	Ln(F0/F)
	10	341	1121.67		1.4104	0.343874
	20	339	698.767		2.26399	0.817128
	30	341	448.2		3.52967	1.26121
	40	341	329.833		4.79636	1.56786
	50	339	240.733		6.57159	1.88276
	60	340	168.933		9.36464	2.23694
	70	341	118.3		13.3728	2.59322
	80	337	83.06		19.0465	2.94688
	90	339	65.5667		24.1281	3.18338
	100	338	54.06		29.2638	3.37635
