# Supplementary material for: In vitro inhibitory effect of five natural sweeteners on α-glucosidase and α-amylase
Source: Royal Society of Chemistry journal article supplement (doi:10.1039/d3fo05234f), 2024-01-01
Supplement: d3fo05234f1.zip [file -glucosidase.xlsx]

## Sheet: GA
	Wavelength/nm	0	9.90099	19.6078	29.1262	38.4615	47.619	56.6038	65.4206	74.0741	82.5688	90.9091
	300	296	286.133	284.333	280.6	278.1	271.967	264.533	260.533	255.5	251.867	250.067
	301	315.9	305.3	302.467	299.167	296.867	291.333	282.033	278.333	273.6	270.5	266.233
	302	349.767	337	334.667	330.233	326.8	322.733	312.767	306.1	300.55	297.367	294.333
	303	386.3	373.567	370.067	366	362.8	356.667	346.567	339.733	333.5	330.333	326.133
	304	429.3	414.5	411.233	405.7	402.033	395.4	384.167	376.9	370.1	365.6	361.867
	305	474.167	458.767	454.3	450.167	443.6	436.433	424.2	416.033	408.25	405.1	398.733
	306	522.133	503.9	500.633	494.533	488.7	480.4	466.733	457.833	449.5	444.667	439.333
	307	570.9	550.2	545.467	539.233	533.867	524.067	509.8	499.567	489.45	485.833	478.7
	308	618.633	595.8	590.667	582.767	578.067	566.5	552.333	540.433	530.6	525.333	518.633
	309	669.367	644.333	638.233	631.433	626.3	614.933	596.367	585	573.35	567.333	560.767
	310	721.133	694.933	687.167	679.333	672.033	661.1	641.4	629.6	616.5	610.3	602
	311	773.1	745.3	737.667	727.767	719.533	707.633	684.733	674.833	660	652.767	643.467
	312	824.1	791.3	783.667	774.4	764	751.267	728.667	713.6	700.5	693	682.167
	313	869.833	834.233	826.333	815.533	804.767	791.267	767.167	753.367	736.35	729.7	717.5
	314	914.567	878.433	869.967	855.833	846.033	831.6	805.167	790.633	772.15	764.4	753.3
	315	957.767	920.267	909.167	895.133	885.7	870	840.633	826.767	808	798.533	787.133
	316	999.933	958.533	947.433	933.2	922.3	902.9	875.4	858.767	837.3	830.767	817.833
	317	1038.67	993.9	980.967	964.8	953.933	934.9	905.8	886.4	865	857.233	842.733
	318	1072.33	1024.8	1010.4	994.8	981.167	964.1	931.633	912.7	889.45	880.333	866.667
	319	1104.67	1055.67	1040.97	1023.4	1009	991.133	954.733	937.833	913.55	903.933	888.367
	320	1138.67	1086	1068	1050.37	1037	1017.03	980.867	961.367	934.45	926.4	910.5
	321	1167.67	1111.33	1093.67	1076	1061.33	1040.87	1003.63	982.633	956.9	947.933	930.067
	322	1197	1135.67	1118.33	1101	1086.33	1062.67	1025.07	1005.03	975.8	964.5	950.3
	323	1222.33	1159.33	1142.33	1122	1107	1082.67	1046.43	1026.27	994.1	983.3	966.333
	324	1248.67	1183.33	1164	1145.33	1130.67	1103.67	1066	1043.1	1011.75	1001.87	985.167
	325	1273.67	1210.33	1185.33	1166	1152	1126	1084.33	1062.67	1030.95	1019.4	1002.2
	326	1301.33	1231	1209	1186.67	1169	1145.33	1103.67	1079	1049	1035.33	1018.63
	327	1322	1252.67	1230.67	1207.67	1187.67	1163.33	1121.67	1098.33	1065	1051.2	1034.5
	328	1344.67	1272.33	1248.67	1228	1208.33	1181.33	1138.67	1113	1080	1067	1050.33
	329	1364	1290.33	1268.67	1243.67	1224.33	1196.67	1154.33	1128.67	1094	1081.33	1064.67
	330	1383	1307.33	1283	1261	1241.67	1212.33	1167.67	1142	1108.5	1094.33	1075.33
	331	1398.67	1321.67	1297.33	1273.67	1255.33	1223.67	1178	1155.33	1118.5	1104.33	1085
	332	1413	1332.67	1306.33	1283.33	1263	1234	1186.67	1162.33	1125.5	1112	1095
	333	1421	1344	1316.33	1291	1271	1239.33	1193	1169	1133	1118	1100
	334	1426	1347	1322	1296.67	1275.33	1244.33	1196.67	1171.67	1133.5	1121.33	1101
	335	1434.67	1351	1325.67	1297	1277.33	1247.33	1201.33	1173.67	1136	1122.33	1101.67
	336	1434	1352.33	1323.33	1298.33	1279.33	1247.33	1200	1174.67	1135.5	1122	1103.33
	337	1434.33	1347.67	1322.33	1296	1274	1244	1196.33	1171	1135	1119.67	1099.67
	338	1428.67	1344	1317.33	1292	1269.67	1241.67	1191.33	1168.33	1131	1115	1096.33
	339	1423	1337.67	1311	1284.33	1262	1234.33	1184.67	1159.67	1123	1108.67	1089
	340	1414.33	1327.33	1302	1274	1254.33	1222.67	1176.67	1148	1112	1098.33	1079
	341	1401.67	1316	1289.33	1261.67	1241.67	1214.33	1164.67	1137.67	1103	1088	1071
	342	1389	1302.33	1278.33	1249.67	1232	1199.33	1153.33	1127.33	1092	1077.33	1059
	343	1373.67	1288.33	1262	1237.33	1216.33	1187.67	1142.67	1114	1078.5	1063.67	1046.47
	344	1356.67	1271	1244.67	1220.33	1200.67	1170	1126	1100.67	1065.5	1049.97	1031.03
	345	1337	1254.67	1228	1202.67	1184.67	1154.67	1110	1085	1047.5	1036.33	1014.93
	346	1319	1235.33	1209.33	1184	1164.67	1136	1089.33	1065	1031.1	1017.77	1000.13
	347	1294.33	1217.33	1190	1165	1146.33	1116.67	1073.67	1048.2	1012.4	998.333	982.633
	348	1274	1197.33	1169.67	1145.33	1127	1096.67	1052.63	1028.47	996.35	982.833	964.4
	349	1254	1175.67	1149	1123	1105.33	1078	1035.2	1010.53	978.75	964.167	948.767
	350	1229.33	1152	1125.33	1104	1084	1055.83	1015.17	991.667	959.45	945.633	928.967
	351	1205.33	1129.33	1102.67	1079.67	1061.57	1033.77	993.667	971.2	937.25	924.867	909.333
	352	1180	1105.67	1078.67	1055.3	1039.4	1013.3	971.867	949.267	919.35	905.7	890.167
	353	1156.33	1082.67	1057.63	1033.87	1019.2	990.633	951.467	928.567	899.5	887.167	870.433
	354	1128.67	1057.1	1032.73	1009.7	994.733	967.367	931.033	907.5	876.8	864.067	849.933
	355	1103.67	1030.7	1007.87	986.5	969.933	944.3	907.4	884.367	857.5	843.433	828.167
	356	1075.67	1007.2	981.967	960.733	945.467	921.467	884.367	862.933	833.3	820.733	806.733
	357	1049.67	978.967	955.933	936.5	918.8	895.9	860.6	840.667	812.15	802.067	786.633
	358	1022.67	955.433	931.967	913.5	896.833	875.467	838.467	819.533	790	780.1	767.833
	359	995.1	930.433	907.8	888.567	872.867	851	817.367	797.367	770.4	758.867	745.733
	360	966.8	904.1	881.4	861.567	847.167	826.433	792.767	773.733	747.55	737.033	724.9
	361	939.867	878	856.1	838.5	823.567	801.4	768.933	750.967	726	717.167	702.633
	362	911.9	850.7	830.167	814.533	799.433	776.1	746.567	729	703.95	694.633	681.5
	363	885.3	825.467	805.767	788.5	775.2	754.1	723.367	707.233	681.35	674.167	660
	364	857.933	802.467	781.733	766	751.033	730.7	700.7	685.067	660.9	653.733	641.067
	365	829.433	775	756.533	740.567	727	708.767	677.8	664.233	641.05	632.867	620.1
	366	804.633	752.4	732.9	716.767	704.6	687.167	656.733	642.8	622.1	612.7	601.567
	367	778.767	728.467	710.033	693.733	682.8	664.033	636.2	621.233	600.65	592.433	581.767
	368	753.933	703.933	687.933	671.567	659.333	642.367	615.767	600.3	580.95	572.167	563.433
	369	729.3	681.3	663.933	648.4	636.967	620.2	594.733	580.7	562.8	554.333	545.133
	370	703.467	656.6	641.733	625.2	615.433	598.467	572.967	560.7	544.1	534.467	524.767
	371	677.9	632.3	617.633	603.967	593.733	576.967	553.8	540.167	523.3	515.433	505.967
	372	655.633	610.733	596.6	582.967	572.333	555.767	535.267	521.033	504.5	496.6	488.233
	373	632.833	590.167	574.767	563.067	551.867	538.1	515.633	504.2	487.5	479.233	470.833
	374	609.8	569.133	554.467	542.867	532.433	518.867	498.3	486.167	470.1	463.533	454.2
	375	587.233	548.2	533.1	522.433	512	499.167	479.333	466.567	453.15	446.067	438.067
	376	564.2	527	515.367	501.233	494.467	480.6	460.767	449.333	435.95	428.767	421.667
	377	544.5	506.833	494.1	482.7	474.967	462.633	443.5	432.267	419.55	412.867	405.267
	378	523.233	488	475.7	465.267	457.4	445.133	427	416.967	403	397.4	390.267
	379	503.933	468.867	458.467	447.533	439.1	427.467	410.967	400.733	388.9	381.9	375.433
	380	482.8	450.9	439.267	430.533	422.7	411.367	394.967	385.033	373.7	367.2	361.6
	381	463.967	433.667	421.067	412.967	405.567	395.667	380.167	369.9	359	352.9	347.167
	382	446.9	415.167	405.967	396.833	390.067	379.867	364.267	356.067	345.35	338.967	333.433
	383	428.867	399.9	390.533	380.567	374.667	365	351.033	342.4	331.45	326.833	320.433
	384	411.133	384.1	375.233	365.8	360.4	350.833	337.533	327.7	319.35	313.1	308
	385	393.733	368.5	360.367	351.933	346.8	337	324.033	314.467	305.85	301.533	295.8
	386	379.633	353.633	345.6	336.9	332.033	322.867	308.967	301.5	294.25	289.367	283.467
	387	363.9	339.533	332.033	324.333	317.833	309.133	297.433	289.7	281.45	276.867	271.9
	388	350.233	326.433	318.867	311.467	305.167	297.467	285.7	278.567	272	267.1	261.4
	389	336.033	313.067	305.067	298.667	293.433	286.167	274.2	267.933	261.75	256	252
	390	322.467	300.333	293.433	287.1	281.667	274.467	264.333	257.433	249.9	246.467	242.367
	391	309.233	289.133	280.667	276.2	270.6	263.333	253.633	247.7	239.75	236.867	232.967
	392	296.1	277.1	270.567	264.733	260.367	252.767	243.9	237.167	231.25	228	223.633
	393	284.833	266.533	259.567	255.133	249.933	243.967	234.667	227.967	223.2	218.833	215.4
	394	272.8	254.967	250.233	245.2	239.867	233.867	225.367	219.233	214.3	210.267	206.633
	395	262.6	244.933	239.8	234.3	230.267	224.633	215.5	210.3	205.9	202.367	198.5
	396	251.9	235.567	230.467	224.667	220.733	215.833	207.067	202.067	197.7	194.767	191.8
	397	242.6	226.8	221.167	216.767	212.333	207.767	199.367	194.467	190.2	186.7	184.1
	398	232.567	218.967	213.4	208.367	204.667	200.2	192.933	187.9	182.6	180.233	177.8
	399	223.433	209.6	204.6	200.333	196.9	192.1	185.3	180.233	176.85	173.333	170.9
	400	213.867	200.7	196.2	192.867	189.467	185.367	178.1	173.633	170.05	167	165.1
	401	205.967	193.2	189.367	185.467	182.167	177.767	171.267	166.767	163.4	161.567	158.7
	402	198	186.167	181.733	178.4	175.1	170.633	164.567	160.8	157.8	155.433	153.033
	403	190.767	179.3	174.367	171.767	168.633	164.833	158.367	154.8	152.6	150.333	147.667
	404	182.933	172.367	168.267	164.9	162.333	158.733	153.033	149.233	147.1	144.933	142.4
	405	176.433	165.467	161.9	159	155.867	153.033	147.667	143.233	141.45	139.1	137.367
	406	169.733	159.3	156.3	153.167	150.367	147.467	142.8	138.733	137.25	134.4	132.767
	407	163.167	154.167	150.433	147.433	145.467	141.9	137.667	133.933	131.65	129.533	128.067
	408	157.367	148.2	145.633	142.6	140.4	137.133	132.9	129.733	128	125.6	124.233
	409	151.3	143.533	140.567	138.167	136.267	132.967	128.6	125.367	123.9	121.767	120.633
	410	146.4	138.233	136.467	133.433	131.767	129.033	125.033	121.7	120.25	117.867	116.7
	411	140.5	133.8	131.4	128.533	127.033	124.533	120.7	117.633	117.05	114.6	113.2
	412	136.167	129.6	126.967	124.833	122.933	121.167	117.233	113.367	112.95	111.8	109.833
	413	132.167	125.933	123.333	120.733	119.167	117.533	113.833	110.367	109.95	108.533	107.233
	414	127.8	121.7	119.6	117.733	115.833	113.8	110.767	108.033	107.25	106	103.9
	415	124.133	118.367	116.133	114.267	112.667	111	107.833	104.733	104.7	102.933	101.33
	416	120.7	114.767	112.8	110.667	109.4	107.967	104.767	102.087	102	99.9367	99.3
	417	117	111.933	109.967	108.067	106.933	104.733	102.037	99.0233	99.185	97.2667	96.5567
	418	113.4	108.933	107.267	104.9	104.4	102.037	99.4567	96.79	97.03	95.1733	94.1933
	419	110.467	105.767	103.933	102.833	101.003	99.4467	97.5333	94.2567	95.09	92.9867	91.9833
	420	107.267	102.767	101.787	99.8333	98.33	97.0267	94.82	91.8733	92.68	91.2733	89.8633
	421	104.1	100.02	99.0967	97.06	96.3033	95.02	92.4733	89.56	90.62	88.86	88.0133
	422	102.033	97.59	97.2467	95.04	93.6	93.11	90.5967	88.06	88.97	87.3233	85.8367
	423	99.7067	95.9967	95.19	93.09	91.5567	90.9267	88.7933	86.6067	86.9	85.4433	84.6267
	424	97.7367	93.74	92.7667	91.8	89.74	89.1667	86.83	84.48	85.1	83.8967	82.6667
	425	95.8267	92.1033	90.7167	89.44	88.1767	87.1933	85.6733	82.9167	84.035	82.08	81.41
	426	93.4033	90.2567	89.0733	87.4767	86.65	85.96	83.79	81.44	82.46	80.3333	80.2967
	427	91.9333	88.6267	87.79	86.1833	85.33	84.59	82.5967	79.9	81.085	79.6733	78.9733
	428	89.6933	87.1867	85.8833	85.21	83.7367	83.0967	80.9267	78.2867	79.865	78.2333	77.4567
	429	88.5333	85.9067	84.7833	83.77	82.7667	81.46	79.79	77.56	78.205	77.36	76.6
	430	87.11	84.1433	83.5533	82.3733	81.4167	80.5433	78.8633	76.4233	77.35	75.8567	75.6433
	431	86.0467	83.52	82.1733	81.45	80.4033	79.8633	77.9533	75.43	76.19	75.3433	74.76
	432	84.66	82.1333	80.93	80.6733	78.84	78.58	76.5833	74.8967	75.645	74.3233	73.6133
	433	83.88	81.1267	80.3967	79.3733	78.4633	77.25	75.92	74.2967	74.75	73.3133	72.7967
	434	83.0467	80.5433	79.4233	78.32	77.8167	76.67	74.96	73.3633	73.34	72.58	72.0667
	435	82.3133	79.12	78.29	77.41	76.9033	75.55	74.37	72.5367	72.97	72.2333	71.4467
	436	81.19	78.3767	78.0767	76.6767	75.7267	75.0633	73.8267	71.4933	72.425	71.25	70.7533
	437	80.28	77.76	77.43	76.2	75.0533	74.08	73.0167	70.63	72.27	70.6667	70.1133
	438	79.4933	77.3633	76.4533	75.22	74.4967	73.77	72.11	70.5367	71.365	70.4533	69.4733
	439	78.7333	76.9233	75.8067	74.7967	73.8433	73.3367	71.85	69.63	70.645	69.84	69.1067
	440	77.8833	75.76	74.8533	74.62	73.3933	72.48	70.83	69.5	70.155	69.13	68.4433
	441	77.1133	75.0267	74.89	73.85	72.58	71.9633	70.7167	68.2833	68.885	68.51	67.5233
	442	76.38	74.3467	73.8233	73.0233	72.06	71.4467	69.9867	67.91	68.065	67.7867	67.5
	443	75.83	73.72	73.0233	72.1567	71.7067	70.7167	69.1533	67.3067	68.13	67.5333	66.7
	444	74.79	73.0467	72.5767	71.66	70.6667	70.1133	68.81	66.82	67.62	66.75	66.2033
	445	74.6067	72.7867	71.97	70.9833	70.2933	69.6033	67.89	66.25	67.22	65.8533	65.61
	446	73.9167	72.0767	71.1	70.1867	69.67	68.9867	67.4	65.6833	66.225	65.76	64.9
	447	73.16	71.29	70.11	69.4333	68.86	68.16	66.72	64.78	65.605	64.7067	64.5233
	448	72.3133	70.6367	69.5533	69.1933	68.07	67.3867	65.7067	64.45	64.89	64.3533	64.07
	449	72.02	70.0467	69.17	68.7033	67.5633	66.7767	65.26	63.7067	64.3	63.7933	63.3433
	450	71.57	69.3933	68.6333	67.7467	66.6267	65.9933	64.8933	63.1067	63.5	63.2367	62.53
	451	70.5733	68.47	67.8133	67.62	66.1033	65.71	64.0033	62.2667	62.95	62.5333	61.8967
	452	70.0033	67.66	67.0933	66.39	65.62	65.1367	63.2267	61.8867	62.305	61.7167	60.9267
	453	68.9	67.5433	66.3167	65.5067	65.0067	64.2933	62.94	61.14	61.875	61.1867	60.5567
	454	68.9133	66.4767	65.6433	64.8367	64.2967	63.8367	62.15	60.3967	61.44	60.3167	59.7433
	455	68.14	65.8133	65.0533	64.4633	63.5767	63.02	61.5467	59.9533	60.49	59.73	59.2167
	456	66.7833	64.8867	64.4667	63.9933	63.06	62.25	60.5367	59.2033	59.885	59.05	58.4167
	457	66.5533	64.6433	63.4633	62.7433	62.3967	61.5167	60.2067	58.4433	59.22	58.6633	58.0333
	458	65.7833	63.9067	62.6633	62.3733	61.66	60.8333	59.2267	58.19	58.205	58.0233	57.1467
	459	64.51	63.24	62.3133	61.81	60.55	60.2067	58.19	57.4033	57.54	57.22	56.3333
	460	63.92	62.4833	61.2567	60.6833	59.75	59.4467	57.8767	56.7933	56.95	57.0333	56.0667
	461	62.9267	61.3267	60.7233	59.9	59.2967	58.77	57.1567	55.96	56.34	55.6867	55.6767
	462	62.68	60.7367	59.6033	59.4233	58.4667	58.0633	56.6467	54.9633	55.655	54.8533	54.43
	463	61.6733	60.14	58.9733	58.86	57.5367	57.3267	56.2133	54.34	54.905	54.16	53.7933
	464	60.7467	58.5933	58.33	57.8633	56.9667	56.4633	55.0267	53.71	53.99	53.1767	53.2667
	465	60.06	58.4333	57.4233	56.8833	56.5767	55.6667	54.73	53.01	53.04	52.74	52.3567
	466	59.3633	57.5533	56.91	55.7667	55.4467	54.8533	53.72	52.35	52.345	51.9467	51.8233
	467	58.1733	56.71	55.9633	55.4	54.7333	54.3967	53.0933	51.6	52.035	51.42	50.6567
	468	57.3333	56.2567	55.1367	54.5	53.8167	53.1033	51.9267	50.9567	51.06	50.7633	50.22
	469	56.96	55.3167	54.4433	53.79	53.29	52.09	51.4833	50.16	50.045	49.7933	49.6433
	470	56.4267	54.3967	53.6267	52.9333	52.57	51.6767	50.8167	48.86	49.615	48.98	49.0067
	471	55.2	53.5333	52.9833	52.0367	51.76	50.87	49.67	48.3867	48.68	48.44	48.18
	472	54.1067	52.55	51.8533	51.6	50.6933	50.2233	48.7267	47.5467	48.33	47.5933	47.3233
	473	53.3333	51.8667	51.01	50.3767	49.9067	49.6533	48.11	46.84	46.91	47.0667	46.57
	474	52.6533	51.0867	50.2933	49.56	49.2767	48.6667	47.86	46.54	46.56	46.3067	45.6833
	475	51.8367	50.47	49.68	49.4933	48.3	48.1133	46.63	45.72	46.255	45.64	45.24
	476	51.24	49.2867	49.0433	48.4867	47.33	47.0633	46.0267	44.9567	45.265	44.8033	44.44
	477	50.2767	48.57	48.2933	47.7533	46.8633	46.29	45.3967	44.02	44.755	43.9833	43.8767
	478	49.7533	48.2733	47.64	46.6867	46.0233	45.94	44.5867	43.3533	43.685	43.1167	43.01
	479	48.8733	47.6033	46.79	46.1633	45.5467	45.0833	43.6967	42.8833	43.075	42.6933	42.4567
	480	48.26	46.7467	46.1833	45.57	45.36	44.13	43.2867	42.2167	42.695	42.1	41.8267
	481	47.6333	46.1267	45.5067	44.8467	44.5233	43.8933	42.7233	41.83	42.105	41.4267	41.1067
	482	47.0867	45.6567	44.89	44.3433	43.5867	43.14	42.0967	41.1233	41.545	40.9833	40.6867
	483	46.4	45.11	44.1833	43.7967	43.22	42.89	41.5433	40.9633	40.62	40.3367	40.18
	484	45.72	44.2533	43.6567	43.3767	42.5633	42.24	41.1867	40.1	40.16	39.8367	39.71
	485	44.9433	43.5533	43.0433	42.75	41.7867	41.69	40.46	39.5733	39.66	39.4833	39.0333
	486	44.4567	42.9767	42.5233	42.0467	41.6167	40.82	39.7533	38.9833	38.895	38.7133	38.7867
	487	43.62	42.4133	41.8867	41.3767	40.7367	40.3033	39.3267	38.4733	38.585	38.0733	38.04
	488	43.1667	41.9467	41.22	40.55	40.05	39.7	38.7	37.88	38.1	37.3733	37.43
	489	42.6267	41.5667	40.7633	40.2133	39.6733	39.1867	38.0167	37.3867	37.51	37.0633	36.9867
	490	42.2267	40.8833	40.2167	39.6867	39.0833	38.7233	37.75	36.7167	36.9	36.9	36.36
	491	41.4133	40.25	39.59	39.2067	38.2733	37.9033	37.2567	36.4233	36.335	36.24	35.5233
	492	41.0133	39.6867	38.5267	38.2767	38.12	37.4	36.5267	35.58	35.62	35.3267	35.2067
	493	40.2	38.7633	38.1267	37.4733	37.44	36.9233	35.77	34.9	35.5	35.0133	34.7833
	494	39.6433	38.1367	37.62	37.1633	36.62	36.17	35.27	34.5233	34.525	34.2967	33.9333
	495	38.9267	37.3933	37.04	36.74	36.12	35.4167	34.71	33.75	34.165	33.6333	33.5533
	496	37.9067	36.92	36.2433	35.5367	35.42	34.99	33.9967	33.4267	33.35	33.09	33.0033
	497	37.52	35.6933	35.38	35.2533	34.9867	34.2533	33.4967	32.7233	32.93	32.74	32.3567
	498	36.4967	35.3767	35.0233	34.59	33.92	33.66	32.9433	32.1933	32.355	32.1	31.7667
	499	36.0667	34.7667	34.3567	34.0333	33.4967	32.9767	32.2333	31.62	31.93	31.3267	31.1267
	500	35.15	34.0767	33.76	33.2733	32.8833	32.3767	31.55	30.78	30.95	30.7967	30.5333
	GA/µg/ml	荧光强度	最大发射波长		F0/F
	9.90099	1352.33	336		1.06088
	19.6078	1325.67	335		1.08222
	29.1262	1298.33	336		1.10501
	38.4615	1279.33	336		1.12142
	47.619	1247.33	336		1.15019
	56.6038	1201.33	335		1.19423
	65.4206	1174.67	336		1.22134
	74.0741	1136	336		1.26291
	82.5688	1122.33	335		1.27829
	90.9091	1103.33	336		1.3003

## Sheet: CT
	Wavelength/nm	0	1.23762	2.45098	3.64078	4.80769	5.95238	7.07547	8.17757	9.25926	10.3211	11.3636
	300	287.433	242.933	224.9	210.367	198.233	188.933	176	170.067	161.9	151.333	142.367
	301	307.633	260.6	240.267	224.533	210.1	201.333	189.367	181.167	173.267	161.067	151.933
	302	340.6	287.167	265	247.433	232.233	221.167	208.9	200.267	191.667	178.367	166.967
	303	376.133	317.533	293.167	273.833	256.633	244.967	230.733	221.1	211.833	198.533	185.6
	304	416.233	352.667	325.733	304.033	284.8	271.9	256.2	245.6	234.4	219	205.633
	305	459.567	389.833	360	336.267	313.133	300.867	282.7	271.6	258.567	242.2	226.433
	306	505.867	428.4	395.633	370.2	345.867	330.467	310.933	298.8	285.067	266.867	249.433
	307	552.533	465.667	431.8	402.067	377.067	359.767	338.9	325.667	309.833	290.033	271.633
	308	598.733	504.633	465.967	434.6	407.167	388.733	367.867	351.033	336.1	313.833	293.633
	309	647.267	544.867	503.533	468.767	439.1	419.633	394.867	379.033	362.433	339.333	317.467
	310	698.667	585.8	541.2	503.8	471.8	451.467	424.733	407.233	388.467	365.067	341.7
	311	748.7	626.533	577.267	538	504.5	482.1	454.333	435.3	415.2	389.5	364.1
	312	795.9	665.367	611.867	571.833	535.167	510.533	480.233	461.033	440.9	411.7	386.167
	313	840.867	698.367	644.467	601.7	562.533	535.867	504.967	484.3	462.767	433.467	405.233
	314	884.733	732.733	676.033	629.9	589.733	563.133	527.7	507.6	483.967	453.467	425.9
	315	927.567	765.9	704.267	656.367	614.733	586.567	551.733	529.4	504.4	472.8	442.233
	316	965.767	794.133	730.9	681.533	636.833	606.4	571.5	547.933	522.467	490.633	458.633
	317	1001.33	819.5	753.333	702.3	656.2	626.167	589.433	564.2	539.833	505.633	471.167
	318	1033.33	843.067	775.233	722.133	675.2	642.633	603.667	579.7	553.967	518.433	483.333
	319	1065.33	863.7	793	739.233	690.467	657.367	619.533	592.833	566.367	530.867	495.8
	320	1095.67	884.767	811.2	755.033	706.933	671.767	633.1	605.4	579.033	542.567	506.6
	321	1123	902.9	829.233	771.1	720.4	686.5	645.967	618.1	589.933	551.5	515.967
	322	1152.33	919.9	843.967	783.967	733.8	697.3	655.6	629.9	599.9	560	524.333
	323	1175.33	934.233	858.667	798	744.833	708.867	665.567	639.533	609.533	568.833	532.133
	324	1197.67	952.4	871.567	811	756.833	720.2	676.733	648.8	619.167	578.1	539.567
	325	1223	967.6	885.967	825.2	769.167	732.1	685.767	658.867	628.1	586.867	547.533
	326	1246	983.167	899.033	837.3	779.833	741.767	696.767	668.033	637.733	594.233	555.533
	327	1270	998.533	912	847.333	790.733	751.233	705.133	678.533	645	601.967	562.533
	328	1291	1013.83	924.333	857.467	799.6	761.333	714.067	685.3	652.133	609.367	569.533
	329	1310	1024.13	935.2	866.8	808.533	768.433	721.667	693.567	660.2	616.6	576
	330	1325.67	1033.67	943.6	876.533	816.633	775.7	729.233	699.7	665.6	622.333	581.667
	331	1344.33	1040.67	950.733	884.633	823.567	783.133	734.533	704.233	672.5	627	586.133
	332	1354.33	1047.67	955.8	889.633	829.067	788.033	739.667	707.333	676.467	630.567	589.4
	333	1362.67	1053.33	960.233	892.233	831.8	790.7	742.2	710.9	677.4	633	591.167
	334	1368.67	1053	963.133	894.433	833.567	790.767	743.467	712.8	679.433	634.167	592.033
	335	1372.67	1055.67	962.167	893.933	833	790.9	743.533	713.033	679.4	635.2	592.6
	336	1374.67	1052.33	961.433	891.833	831.7	791.6	740.7	711.933	678.967	633.167	591.4
	337	1371.67	1050.33	958.5	888.7	829.067	786.6	739.733	708.7	674.8	630.067	589.9
	338	1369	1045	953	884.167	824.833	783.533	734.833	706.333	672.5	626.833	586.7
	339	1359.33	1036.67	945.6	880.2	818.333	777.333	729.733	700.433	668.133	622.567	581.133
	340	1350.67	1028.5	938.667	870.533	811.933	770.567	723.7	693.333	660.267	617.033	577.8
	341	1339.67	1016.4	927.533	861.167	801.833	761.033	717.833	686	653.233	612.333	570.333
	342	1325.67	1003.47	917.9	849.5	793.5	753.367	707.767	679.4	646.7	602.933	565.3
	343	1310.33	991.667	905.2	839.133	782.9	744.2	698.767	670.2	639.733	596.6	557.533
	344	1295.33	977.533	891.267	828.2	771.8	733.2	688.6	661.767	631.367	587.267	550.033
	345	1276.67	962.833	877.6	815.733	759.733	723.333	677.933	651.433	620.3	579.767	542.367
	346	1258	945.967	863.733	801.567	747.333	710.433	667.4	640.2	610.3	570.1	533.133
	347	1239	931.267	847.067	785.867	734.4	698.333	655.467	630.733	601.1	561.867	524.7
	348	1216.67	913.1	831.233	772.2	721.333	686.5	642.967	618.067	589.767	551.467	515.967
	349	1194	895.5	814.9	760.033	707	672.933	633.133	606.467	578	541.6	507.333
	350	1172.67	877.533	799.3	743.333	691.733	658.767	619.5	594.7	567.1	529.833	496.6
	351	1148.67	859.667	782.767	725.367	680.033	643.867	607.3	581.7	556.767	518.933	486.4
	352	1126.67	840.367	764.533	710.467	663.933	629.767	592.233	568.6	544.033	508.3	475.1
	353	1101	822.033	746.967	696.733	649.833	615.6	578.733	557.033	531.067	497.133	465.3
	354	1077	801.833	729.3	679.167	632.533	601.067	566.2	544.333	519.433	486.033	454.8
	355	1050.67	780.767	711.3	662.9	617	586.867	552.367	530.3	505.1	473.5	444.467
	356	1025	760.3	694.967	644	601.233	572.367	538.467	516.4	494.333	462.567	431.3
	357	998.933	740.933	674.833	627.4	585	555.933	524.9	502.267	481.733	449.167	420.8
	358	974.7	720.967	655.633	611.2	570.5	541.667	510.033	489.633	468.967	437.967	410.567
	359	948.433	701.267	636.967	593.467	554.567	527.2	496	476	455.4	426.733	399.033
	360	920.6	679.033	616.7	576.633	538.3	511.4	481.6	463.2	442.9	414.233	387.233
	361	894.133	660.7	600.2	559.967	522.767	497.667	468.133	449.467	429.8	401.967	376.833
	362	867.767	640.733	582.233	543.2	507.633	482.133	454.567	435.8	416.633	390.667	366.033
	363	842.733	619.967	565.4	526.6	491.9	467.833	440.367	422.433	404.667	379.1	355.767
	364	816.5	601.5	546.667	510.4	476.333	452.633	426.367	410.667	392.233	367.7	344.7
	365	790.267	582.567	530.1	493.033	460.933	438.867	412.433	397.667	380.667	356.133	333.8
	366	765	563.867	512.467	477.967	445.867	424.633	399.9	384.067	367.9	344.6	322.533
	367	742.4	544.8	496.7	461.667	431.733	411.367	386.7	371.533	356.4	333.167	311.567
	368	716.867	526.633	479.3	447.633	417.067	397.333	374.967	359.567	345.167	322.333	301.7
	369	694.633	508.533	463.767	433.1	403.5	384.667	362.833	347.833	333.3	311.967	292.567
	370	668.033	490.933	447.5	416.2	388.933	371.367	350.533	336.433	321.533	301.233	282.2
	371	644.067	472.133	431.833	400.867	375.667	358.7	337.067	324.733	309.933	290.033	272.367
	372	622.333	455.267	415.7	387.4	362.633	345.7	324.6	312.333	299.367	279.467	262.567
	373	600.433	440.433	400.333	374.967	350.133	333.5	314.133	300.567	288.933	270.1	253.9
	374	579.033	424	386.367	361.667	337.933	320.967	302.4	291.5	279.133	260.833	245.367
	375	556.9	407.933	372.633	347.467	325.033	309.233	291.267	280.5	268.9	251.767	236.133
	376	536.367	393.3	359.367	335.333	314.267	297.667	280.333	269.933	258.1	241.967	227.167
	377	517.733	378.967	345.833	322.833	301.833	286.767	270.533	260	248.6	232.7	219.733
	378	498.033	365.2	332.433	310.433	289.833	276.5	260.1	251.133	240.4	224.9	210.067
	379	479.133	349.667	319.133	298.033	278.8	265.467	251.4	241.2	231.1	216.033	203.367
	380	459.633	336.5	307.033	286.7	268.833	255.7	241.367	231.967	221.267	208.367	195.367
	381	440.933	323.633	294.867	274.5	257.233	245.833	232	222.333	213.3	200.467	187.833
	382	423.8	311.067	282.833	264.533	247.967	236.033	222.167	214.433	204.867	192.367	180.833
	383	408.033	297.9	272.567	254.467	238.567	226.9	214.8	206.433	197.367	185.467	174.133
	384	391.033	286.7	261.4	244.533	229.533	218.4	206.067	198.2	189.8	178.9	167.433
	385	375.8	275.667	251.333	235.1	220.333	209.933	197.9	189.567	183.167	171.833	161.367
	386	360.033	264.6	240.733	225.567	211.667	201.933	190.067	183.067	175.6	164.6	155
	387	345.2	253.5	231.967	216.833	203.067	193.7	182.9	175.967	168.9	158.267	149.167
	388	332.633	243.833	223.167	208.533	195.633	185.933	175.333	169.7	162.6	152.5	143.433
	389	318.033	234.567	214.133	200.733	187.933	178.967	169.333	162.967	156.3	147.2	138.2
	390	306.167	225.233	205.733	193.267	180.967	172.3	163	156.8	150.667	141.433	133.533
	391	293.567	216.467	198.467	186.1	173.467	165.967	156.4	150.8	144.133	135.633	127.667
	392	282.1	207.3	190.367	177.733	166.6	159.8	150.933	144.6	138.867	130.867	123.2
	393	270.2	199.633	182.9	171.367	160.767	154.467	145.1	139.833	133.867	126.1	118.933
	394	260.067	191.833	176.267	164.967	154.2	147.9	139.233	134.933	129.467	121.567	114.833
	395	249.033	184.733	169.433	158.3	148.467	142.5	134.9	129.2	125.167	116.8	109.9
	396	239.4	178.133	162.933	152.667	143.267	137.133	128.867	124.733	119.567	112.6	106.5
	397	230.033	171.2	157.1	146.667	138.033	132.333	124.567	119.8	115.567	108.4	102.267
	398	221.5	165.067	150.767	141.467	133.233	127.8	120.033	116.3	111.733	104.467	98.94
	399	212.667	158.767	145.2	136.4	127.533	122.7	116.233	112.133	107.633	101.433	95.1167
	400	204	152.833	140.233	131.4	123.333	118.167	111.733	107.933	103.433	97.5533	91.7467
	401	196.7	146.433	135.133	126.6	119.267	114	107.667	103.733	99.8433	94.2867	88.6267
	402	188.867	141.333	129.767	122.5	114.7	109.9	104.033	100.643	96.13	90.83	85.2767
	403	181.333	136.2	125.3	117.367	110.533	106.267	100.73	96.8333	92.7633	87.5	82.3267
	404	174.267	130.9	121.333	113.333	107.067	102.633	97.4033	93.72	90	84.7533	80.0633
	405	167.733	126.367	116.7	109.467	103.3	99.17	93.9467	90.2967	86.9867	81.8467	77.4233
	406	160.8	121.7	112.567	105.667	99.7533	95.6133	90.7267	87.2833	84.37	79.13	75.0933
	407	155.833	118.267	108.5	102.3	96.8267	92.7967	87.9133	84.57	81.6333	77.23	72.5233
	408	149.767	114.4	105.2	99.36	93.0067	89.3633	84.93	82.19	78.97	74.2967	70.3233
	409	145.1	110.5	102	95.7233	90.2333	86.9167	82.1233	79.3833	76.6867	72.1933	68.8233
	410	140.1	107.233	98.7633	93.16	87.4633	84.2233	79.5933	77.5333	74.35	70.18	66.3967
	411	135.133	103.633	95.89	89.9367	85.13	81.9233	77.77	75.0867	72.1767	68.12	64.2933
	412	130.533	100.983	92.91	87.63	82.5367	79.1	75.82	72.87	70.36	66.3633	62.8233
	413	126.833	97.9967	90.4967	84.9767	80.5567	77.4733	73.8067	70.99	68.52	64.4133	61.1367
	414	122.967	94.6933	88.0867	82.8367	78.42	75.8567	71.6133	69.43	66.9233	62.7433	59.7533
	415	119.067	92.54	85.7067	80.87	76.4633	73.9767	69.8567	67.83	65.34	61.1033	57.75
	416	115.3	89.6333	83.37	78.7433	74.69	71.82	68.3433	66.05	63.58	60.07	56.7867
	417	112.133	87.8967	81.62	76.86	72.6267	70.1433	66.5467	64.3033	62.2067	58.5067	55.51
	418	109.133	85.5833	79.56	75.28	71.19	68.85	64.9133	62.9367	60.2967	57.1967	54.0533
	419	106.367	83.6767	77.76	73	69.4933	67.3467	64.0133	61.1833	59.2633	56.06	53.2233
	420	103.867	81.7067	76.24	72.0067	68.0167	65.9233	62.1367	60.3233	58.2933	54.95	52.0833
	421	101.233	80.3267	74.5633	70.4867	66.6367	64.62	61.0467	58.7667	56.5	53.5433	50.8667
	422	99.2533	78.68	73.4333	69.0467	64.96	63.19	59.85	57.7067	56.0533	52.9433	50.0967
	423	96.96	77	71.8667	67.7367	63.8167	61.5167	59.05	56.7067	54.9167	52.0533	49.39
	424	94.8067	75.69	70.58	66.3033	63.0067	61.05	58.0433	56.1933	53.98	50.8	48.5867
	425	92.67	74.0333	68.96	65.3233	62.5767	60.0167	57.17	55.27	52.97	50.55	47.74
	426	91.0333	73.0167	67.96	64.55	61.1833	59.1867	56.0633	54.2867	52.2233	49.4733	47.0933
	427	89.7033	71.9767	67.0367	63.36	60.1667	57.9567	55.46	53.4667	51.63	48.9467	46.52
	428	87.7267	71.1333	66.07	63.03	59.36	57.54	54.79	52.7367	51.0367	48.14	45.85
	429	86.5433	70.3033	65.8567	62.4	58.7733	56.9933	53.8267	52.3567	50.6633	47.64	45.24
	430	85.3333	69.07	64.7633	61.4233	57.88	55.9533	53.54	52.0167	49.9067	47.2033	45.1933
	431	84.42	68.3233	64.09	60.56	57.2733	55.9367	53.2833	51.1667	49.4533	46.7833	44.5167
	432	83.3267	67.77	63.5133	60.42	56.9533	55.3833	52.4867	50.5933	48.87	46.3067	43.86
	433	82.53	67.26	62.8233	59.4067	56.28	54.9	52.1233	50.3933	48.44	46	43.6767
	434	81.5067	66.2133	62.33	58.9933	55.6933	54.3967	51.5933	49.9433	47.8733	45.5667	43.42
	435	80.57	65.8733	62.0733	58.78	55.6367	53.7367	51.2733	49.5167	47.47	45.1267	42.84
	436	79.5933	65.8033	61.1333	58.13	55.07	53.18	50.8067	48.99	47.2967	44.7167	42.5767
	437	79.19	65.1233	60.99	57.6367	55.0767	52.8967	50.4267	48.8233	47.1267	44.6267	41.9333
	438	78.42	64.8233	60.8267	57.4233	54.4833	52.7133	50.25	48.2933	46.4667	44.28	42.1733
	439	78.0833	64.0367	60.12	56.9667	53.99	52.5033	50.1333	48.1967	46.5967	43.8067	41.94
	440	77.1567	63.9567	59.4767	56.31	53.66	52.0733	49.5967	47.9267	46.0167	43.5733	41.45
	441	76.2833	63.2667	59.27	55.7767	53.2267	51.48	49.3	47.5533	45.7933	43.2567	41.19
	442	75.8467	62.8633	58.7333	55.82	52.8567	51.44	49.0333	47.32	45.5167	43.08	40.9967
	443	75.21	62.54	58.66	55.3367	52.3133	50.8833	48.4533	46.8833	45.2267	42.7333	40.8133
	444	74.73	62.08	58.3633	54.8567	51.9567	50.62	47.7133	46.3833	44.8267	42.2267	40.34
	445	74.1267	61.6333	57.7433	54.4767	51.4267	49.8567	47.98	46.1567	44.5367	42.1	40.2033
	446	73.3233	61.2067	57.1467	54.1767	51.21	49.6933	47.29	45.6467	44.0467	41.8367	39.3933
	447	72.6733	60.7033	56.78	53.3	51.32	49.4567	46.9167	45.3333	43.75	41.4533	39.13
	448	71.99	60.2933	56.4067	53.36	50.7167	48.9467	46.6733	44.8333	43.5333	41.22	39.2567
	449	71.3767	59.5333	55.9167	52.8767	50.2633	48.5833	46.0833	44.68	42.85	40.5767	38.5767
	450	70.9733	58.9933	55.5167	52.16	49.7433	48.2	45.7633	44.4867	42.75	40.5133	38.7067
	451	70.2867	58.8133	54.9467	52.0067	49.34	47.87	45.36	43.6467	42.4733	40.1767	38.3267
	452	69.38	58.3933	54.3633	51.3933	48.75	47.3733	45.2867	43.5767	42.1133	39.46	37.7633
	453	68.8067	57.5267	54.1433	51.2	48.21	46.83	44.7	43.14	41.5433	39.44	37.3533
	454	68.25	57.0933	53.3967	50.5767	48.1233	46.8033	44.1367	42.7867	41.2233	39.03	37.2567
	455	67.5433	56.3533	53.1267	50.01	47.63	46.09	43.85	42.3233	40.86	38.5967	36.7767
	456	66.8167	55.94	52.5933	49.5367	46.89	45.2	43.2967	41.73	40.61	38.4767	36.3267
	457	66.0533	55.67	51.9367	49.04	46.5767	45.2067	43.1067	41.2567	39.9733	37.6367	36.09
	458	65.5533	54.68	51.1267	48.6567	45.9933	44.8867	42.4533	41.1367	39.71	37.4833	35.89
	459	64.7833	54.3933	50.77	47.8867	45.4533	44.2	41.8433	40.5333	39.4167	36.8133	35.0767
	460	64.0467	53.7033	50.2967	47.7167	45.0533	43.5133	41.7833	40.0833	38.6	36.6967	34.67
	461	63	53.2533	49.5167	47.1033	44.4933	43.0033	41.0333	39.5667	38.3933	36.0633	34.4267
	462	62.3467	52.62	48.91	46.4833	43.8467	42.54	40.7067	39.2	37.69	35.7633	33.87
	463	62.0567	52.1233	48.7	45.93	43.6833	42.02	40.2667	38.8167	37.2133	35.5433	33.7467
	464	60.6033	51.3333	48.0133	45.48	43.0333	41.5367	39.6767	38.07	36.9833	35.06	33.1667
	465	59.8033	50.61	47.1667	44.93	42.5167	41.0567	38.9133	37.62	36.3233	34.62	32.7367
	466	59.27	49.9133	46.5167	43.9467	41.6267	40.4933	38.7867	37.4367	35.94	33.8867	32.42
	467	58.45	48.88	46.09	43.6533	41.08	39.76	38.1033	36.8367	35.5733	33.3333	31.9567
	468	57.9933	48.5167	45.2333	43.1333	40.6	39.6333	37.36	36.4	35.2067	32.7567	31.2667
	469	56.73	47.7933	44.8267	42.51	40.0567	38.6567	37.05	35.6833	34.5367	32.6067	31.1733
	470	55.9133	47.2767	43.9533	41.61	39.5633	38.1633	36.46	35.27	34.1433	31.9867	30.7167
	471	55.22	46.5533	43.6833	41.0067	39.0733	37.8333	36.2033	34.6867	33.7833	31.4367	30.1133
	472	54.3567	45.6833	42.92	40.6933	38.38	37.2533	35.0833	34.3233	32.8833	31.2667	29.7433
	473	53.5733	44.8333	42.1633	39.7867	37.73	36.6433	34.6367	33.5833	32.4633	30.8067	29.18
	474	52.2833	44.39	41.8733	39.5733	37.3033	36.1033	34.2933	32.8933	31.76	30.23	28.56
	475	51.8933	43.7667	41.1833	38.7267	36.63	35.4	33.6733	32.56	31.3267	29.77	28.37
	476	51.18	43.2933	40.4233	38.2533	36.1567	34.88	33.3033	32.0767	31.1533	29.4333	27.7733
	477	50.29	42.6433	39.78	37.6133	35.76	34.54	32.8033	31.6567	30.8833	28.9833	27.4933
	478	49.4967	41.8233	38.9733	37.11	35.1633	34.0333	32.4267	31.0633	30.26	28.6133	27.14
	479	48.8633	41.3867	38.53	36.42	34.6233	33.6733	31.9833	30.94	30.2033	28.1433	26.6167
	480	47.89	40.6567	37.7133	36.0167	34.44	33.1467	31.5633	30.5067	29.5567	27.7433	26.4167
	481	47.1767	40.1367	37.6133	35.48	33.7867	32.85	31.15	30.0633	28.9667	27.36	26.0633
	482	46.5967	39.62	37.1767	35.15	33.12	32.4333	30.6367	29.76	28.9567	27.2267	25.6267
	483	46.17	39.2667	36.6167	34.9567	32.7167	31.7167	30.3533	29.4067	28.1967	26.7067	25.4167
	484	45.49	38.5733	36.1567	34.29	32.5267	31.4167	30.0733	28.7567	27.94	26.5267	25.2733
	485	45.0233	38.1467	35.96	34.1733	32.0433	31.08	29.6433	28.7167	27.5267	26.1	24.77
	486	44.5967	37.69	35.0867	33.28	31.66	30.6467	29.09	28.11	27.32	25.6767	24.5733
	487	43.7667	37.26	34.56	33.12	31.2233	30.1533	28.79	27.9333	27.0633	25.1833	24.2067
	488	43.1233	36.4833	34.1633	32.48	31.0633	29.8033	28.66	27.5567	26.6967	25.21	23.99
	489	42.5133	35.9933	33.8733	31.9267	30.33	29.4333	28.12	27.0633	26.1733	24.8267	23.6867
	490	41.8067	35.6333	33.4633	31.41	30.17	29.0533	27.6367	26.81	25.8533	24.6367	23.4967
	491	41.2	34.9733	32.83	31.3667	29.4167	28.5533	27.33	26.43	25.75	24.17	23.0833
	492	40.8133	34.3867	32.45	30.7333	28.9333	28.3133	26.8633	25.9367	25.0233	23.8867	22.5667
	493	39.7367	34.1467	31.83	30.26	28.5233	27.9567	26.5167	25.45	24.6667	23.3133	22.2733
	494	39.2467	33.6033	31.5933	29.88	28.07	27.6033	26.1067	25.03	24.2467	23.2133	21.83
	495	38.6033	33.08	30.6433	29.37	27.7333	26.8167	25.4967	24.5833	23.9867	22.5367	21.8067
	496	37.7633	32.3433	30.5533	28.96	27.18	26.3433	25.3033	24.4533	23.64	22.3333	21.2967
	497	37.2067	31.72	29.85	28.4533	26.93	25.7267	24.8767	24.0067	23.51	21.9567	20.8767
	498	36.6	31.11	29.1067	27.9167	26.3833	25.4333	24.5533	23.8133	23.0933	21.8367	20.7767
	499	35.83	30.8867	28.79	27.28	25.91	25.16	24.28	23.2633	22.5067	21.3433	20.4233
	500	34.9833	29.9267	28.1767	26.9533	25.42	24.8233	23.52	22.87	22.1467	21.06	19.9733
		CT/µg/ml	荧光强度	最大发射波长		F0/F
		1.23762	1055.67	335		0
		2.45098	963.133	334		1.42729
		3.64078	894.433	334		1.53691
		4.80769	833.567	334		1.64914
		5.95238	790.767	334		1.7384
		7.07547	743.533	335		1.84883
		8.17757	713.033	335		1.92791
		9.25926	679.433	334		2.02325
		10.3211	635.2	335		2.16415
		11.3636	592.6	335		2.31972
