# Supplementary material for: In vitro inhibitory effect of five natural sweeteners on α-glucosidase and α-amylase
Source: Royal Society of Chemistry journal article supplement (doi:10.1039/d3fo05234f), 2024-01-01
Supplement: d3fo05234f1.zip [file 3.1 Analysis of trilobatin and rubusoside contents in the extracts.xlsx]

## Sheet: Sheet1
	通道说明	样品名称	通道说明	样品名称	通道说明	样品名称	通道说明	样品名称
	2998 Ch1 282nm@1.2nm	三叶苷	2998 Ch1 282nm@1.2nm	CT	2998 Ch2 208nm@1.2nm	甜茶苷	2998 Ch2 208nm@1.2nm	CR
	0	6e-06	0	1.09e-05	0	-9.99e-05	0	-6e-06
	0.00167	1.16e-05	0.00167	2.45e-05	0.00167	-0.0001417	0.00167	-5.5e-05
	0.00333	1.72e-05	0.00333	3.88e-05	0.00333	-0.0001415	0.00333	-0.0001348
	0.005	2.76e-05	0.005	4.69e-05	0.005	-0.0001958	0.005	-0.0001222
	0.00667	4.22e-05	0.00667	4.76e-05	0.00667	-0.0002609	0.00667	-0.0001581
	0.00833	6.21e-05	0.00833	5.16e-05	0.00833	-0.0002921	0.00833	-0.0001666
	0.01	7.84e-05	0.01	5.11e-05	0.01	-0.0003294	0.01	-0.0001152
	0.01167	8.97e-05	0.01167	5.94e-05	0.01167	-0.0003662	0.01167	8.8e-06
	0.01333	8.5e-05	0.01333	6.45e-05	0.01333	-0.000269	0.01333	0.0001038
	0.015	8.17e-05	0.015	7.79e-05	0.015	-0.0001597	0.015	0.0002107
	0.01667	7.32e-05	0.01667	8.87e-05	0.01667	-8.05e-05	0.01667	0.0002712
	0.01833	6.8e-05	0.01833	9.7e-05	0.01833	-5.03e-05	0.01833	0.0003238
	0.02	6.29e-05	0.02	9.02e-05	0.02	8.4e-06	0.02	0.000322
	0.02167	7.11e-05	0.02167	9.63e-05	0.02167	-6.02e-05	0.02167	0.000228
	0.02333	7.38e-05	0.02333	9.64e-05	0.02333	-0.0001155	0.02333	0.0001627
	0.025	7.85e-05	0.025	0.0001083	0.025	-0.0001355	0.025	0.0001359
	0.02667	7.79e-05	0.02667	0.0001251	0.02667	-0.0001274	0.02667	8.64e-05
	0.02833	8.76e-05	0.02833	0.0001548	0.02833	-0.000127	0.02833	2.82e-05
	0.03	9.8e-05	0.03	0.0001685	0.03	-7.82e-05	0.03	4.88e-05
	0.03167	0.0001192	0.03167	0.0001877	0.03167	-7.15e-05	0.03167	6.61e-05
	0.03333	0.0001416	0.03333	0.0001916	0.03333	-9.74e-05	0.03333	4.64e-05
	0.035	0.0001779	0.035	0.0001886	0.035	-8.48e-05	0.035	2.93e-05
	0.03667	0.0001997	0.03667	0.000174	0.03667	-6.89e-05	0.03667	7.18e-05
	0.03833	0.0002075	0.03833	0.0001625	0.03833	-5.56e-05	0.03833	8.85e-05
	0.04	0.0002002	0.04	0.0001468	0.04	3.99e-05	0.04	0.0001028
	0.04167	0.0001817	0.04167	0.000136	0.04167	0.0001289	0.04167	0.0001665
	0.04333	0.0001454	0.04333	0.0001236	0.04333	0.0001719	0.04333	0.0002698
	0.045	0.0001177	0.045	0.0001112	0.045	0.0001855	0.045	0.0003106
	0.04667	9.87e-05	0.04667	0.000108	0.04667	0.0002103	0.04667	0.0003676
	0.04833	8.47e-05	0.04833	0.0001024	0.04833	0.0001861	0.04833	0.0003763
	0.05	8.19e-05	0.05	9.35e-05	0.05	0.0001794	0.05	0.000351
	0.05167	8.58e-05	0.05167	8.06e-05	0.05167	0.0001496	0.05167	0.0002645
	0.05333	8e-05	0.05333	6.94e-05	0.05333	8.59e-05	0.05333	0.0002009
	0.055	6.73e-05	0.055	4.12e-05	0.055	2.64e-05	0.055	0.0001097
	0.05667	5.98e-05	0.05667	1.4e-05	0.05667	-2.81e-05	0.05667	3.97e-05
	0.05833	4.66e-05	0.05833	-8.7e-06	0.05833	-3.28e-05	0.05833	-3.18e-05
	0.06	3.42e-05	0.06	-1.33e-05	0.06	1.35e-05	0.06	-6.58e-05
	0.06167	3.17e-05	0.06167	-1.1e-05	0.06167	0.0001299	0.06167	-8.68e-05
	0.06333	3.78e-05	0.06333	1.5e-06	0.06333	0.0002521	0.06333	-9.72e-05
	0.065	3.8e-05	0.065	2.2e-05	0.065	0.0003486	0.065	-2.53e-05
	0.06667	3.46e-05	0.06667	4.42e-05	0.06667	0.0003809	0.06667	3.18e-05
	0.06833	3.69e-05	0.06833	5.07e-05	0.06833	0.0003378	0.06833	6.6e-05
	0.07	4.19e-05	0.07	5.88e-05	0.07	0.0002629	0.07	7.59e-05
	0.07167	4.07e-05	0.07167	7.02e-05	0.07167	0.0001126	0.07167	0.0001529
	0.07333	4.47e-05	0.07333	7.56e-05	0.07333	-3.48e-05	0.07333	0.0001563
	0.075	6.28e-05	0.075	7.84e-05	0.075	-0.0001968	0.075	0.0001796
	0.07667	6.41e-05	0.07667	9.45e-05	0.07667	-0.0003149	0.07667	0.0002307
	0.07833	5.87e-05	0.07833	9.65e-05	0.07833	-0.0004379	0.07833	0.0002965
	0.08	5.99e-05	0.08	9.47e-05	0.08	-0.0004771	0.08	0.0002649
	0.08167	6.06e-05	0.08167	9.48e-05	0.08167	-0.0004996	0.08167	0.0001747
	0.08333	5.29e-05	0.08333	8.38e-05	0.08333	-0.0004864	0.08333	0.0001187
	0.085	6.34e-05	0.085	6.65e-05	0.085	-0.0004055	0.085	6.89e-05
	0.08667	7.59e-05	0.08667	5.44e-05	0.08667	-0.0003149	0.08667	2e-05
	0.08833	7.75e-05	0.08833	4.15e-05	0.08833	-0.0002691	0.08833	-2.08e-05
	0.09	8.05e-05	0.09	2.83e-05	0.09	-0.0001942	0.09	5.51e-05
	0.09167	7.93e-05	0.09167	3.1e-05	0.09167	-9.91e-05	0.09167	3.36e-05
	0.09333	6.27e-05	0.09333	3.3e-05	0.09333	-7.24e-05	0.09333	-4.38e-05
	0.095	4.64e-05	0.095	3.93e-05	0.095	-3.6e-05	0.095	-0.0001368
	0.09667	4.36e-05	0.09667	4.69e-05	0.09667	7e-07	0.09667	-0.0001648
	0.09833	3.8e-05	0.09833	5.08e-05	0.09833	-2.91e-05	0.09833	-0.0002624
	0.1	4.08e-05	0.1	5.36e-05	0.1	-0.0001047	0.1	-0.0002829
	0.10167	5.54e-05	0.10167	6.08e-05	0.10167	-0.0001763	0.10167	-0.0002402
	0.10333	7.01e-05	0.10333	6.93e-05	0.10333	-0.0002464	0.10333	-0.0001887
	0.105	7.74e-05	0.105	7.61e-05	0.105	-0.0002754	0.105	-0.0001498
	0.10667	7.97e-05	0.10667	7.93e-05	0.10667	-0.0002446	0.10667	-9.68e-05
	0.10833	7.5e-05	0.10833	8.09e-05	0.10833	-0.0001516	0.10833	-4.82e-05
	0.11	6.44e-05	0.11	7.22e-05	0.11	-7.02e-05	0.11	-4.71e-05
	0.11167	4.69e-05	0.11167	5.49e-05	0.11167	5e-06	0.11167	-3.96e-05
	0.11333	3.43e-05	0.11333	3.95e-05	0.11333	4.66e-05	0.11333	-3.76e-05
	0.115	2.53e-05	0.115	4.09e-05	0.115	4.88e-05	0.115	1.1e-06
	0.11667	2.08e-05	0.11667	4.2e-05	0.11667	-4.77e-05	0.11667	4.21e-05
	0.11833	1.72e-05	0.11833	4.97e-05	0.11833	-6.63e-05	0.11833	0.000114
	0.12	1.95e-05	0.12	6.86e-05	0.12	-0.0001048	0.12	0.0001812
	0.12167	1.87e-05	0.12167	9.38e-05	0.12167	-0.0001153	0.12167	0.0002113
	0.12333	2e-05	0.12333	0.0001082	0.12333	-9.91e-05	0.12333	0.0001738
	0.125	1.61e-05	0.125	0.0001109	0.125	5e-07	0.125	9.24e-05
	0.12667	1.77e-05	0.12667	0.0001196	0.12667	2.27e-05	0.12667	-2.6e-05
	0.12833	1.8e-05	0.12833	0.0001263	0.12833	3.98e-05	0.12833	-0.0001246
	0.13	1.48e-05	0.13	0.0001251	0.13	3.19e-05	0.13	-0.0001886
	0.13167	8.7e-06	0.13167	0.0001158	0.13167	3.34e-05	0.13167	-0.0002185
	0.13333	8.1e-06	0.13333	0.0001175	0.13333	2.57e-05	0.13333	-0.0001971
	0.135	6.7e-06	0.135	0.0001063	0.135	3.99e-05	0.135	-0.0001354
	0.13667	1.97e-05	0.13667	8.91e-05	0.13667	9.47e-05	0.13667	-8.1e-05
	0.13833	3.9e-05	0.13833	6.97e-05	0.13833	0.0001485	0.13833	-5.38e-05
	0.14	5.25e-05	0.14	6.53e-05	0.14	0.0001641	0.14	-1.64e-05
	0.14167	7.01e-05	0.14167	6.13e-05	0.14167	0.0001642	0.14167	-3.59e-05
	0.14333	7.7e-05	0.14333	6.36e-05	0.14333	0.0001544	0.14333	-8.3e-05
	0.145	6.42e-05	0.145	6.54e-05	0.145	0.000118	0.145	-0.0001392
	0.14667	4.63e-05	0.14667	7.31e-05	0.14667	9.77e-05	0.14667	-0.000159
	0.14833	4.36e-05	0.14833	7.48e-05	0.14833	9.09e-05	0.14833	-0.0001766
	0.15	2.86e-05	0.15	7.68e-05	0.15	4.59e-05	0.15	-0.0001106
	0.15167	3.07e-05	0.15167	8.06e-05	0.15167	-1.15e-05	0.15167	-4.64e-05
	0.15333	3.55e-05	0.15333	8.64e-05	0.15333	-8.57e-05	0.15333	2e-05
	0.155	4.53e-05	0.155	9.07e-05	0.155	-0.0001833	0.155	5.11e-05
	0.15667	4.68e-05	0.15667	9.7e-05	0.15667	-0.0002869	0.15667	8.58e-05
	0.15833	6.26e-05	0.15833	0.000104	0.15833	-0.0003055	0.15833	7.5e-05
	0.16	6.09e-05	0.16	0.0001065	0.16	-0.0002879	0.16	0.0001008
	0.16167	6.3e-05	0.16167	0.0001042	0.16167	-0.0002096	0.16167	8.52e-05
	0.16333	6.52e-05	0.16333	0.000106	0.16333	-0.0001022	0.16333	0.0001011
	0.165	7.14e-05	0.165	0.0001015	0.165	2.99e-05	0.165	7.58e-05
	0.16667	6.42e-05	0.16667	8.66e-05	0.16667	7.51e-05	0.16667	7.69e-05
	0.16833	6.51e-05	0.16833	7.89e-05	0.16833	8.62e-05	0.16833	4.01e-05
	0.17	6.72e-05	0.17	7.62e-05	0.17	5.22e-05	0.17	8.44e-05
	0.17167	6.41e-05	0.17167	5.98e-05	0.17167	3.08e-05	0.17167	0.0001077
	0.17333	5.94e-05	0.17333	4.37e-05	0.17333	2.09e-05	0.17333	0.0001334
	0.175	5.71e-05	0.175	4.05e-05	0.175	7.01e-05	0.175	0.000101
	0.17667	5.26e-05	0.17667	3.42e-05	0.17667	0.0001344	0.17667	0.0001017
	0.17833	4.98e-05	0.17833	2.96e-05	0.17833	0.0002049	0.17833	7.81e-05
	0.18	4.56e-05	0.18	3.93e-05	0.18	0.0001994	0.18	6.2e-06
	0.18167	4.32e-05	0.18167	5.67e-05	0.18167	0.0001435	0.18167	-4e-07
	0.18333	4.64e-05	0.18333	6.72e-05	0.18333	4.41e-05	0.18333	1.2e-05
	0.185	5.15e-05	0.185	7.29e-05	0.185	-3.69e-05	0.185	2.46e-05
	0.18667	5.15e-05	0.18667	7.32e-05	0.18667	-0.0001146	0.18667	-4.2e-06
	0.18833	6.03e-05	0.18833	6.49e-05	0.18833	-0.0001327	0.18833	2.8e-05
	0.19	5.9e-05	0.19	4.91e-05	0.19	-0.0001418	0.19	1.12e-05
	0.19167	5.85e-05	0.19167	3.08e-05	0.19167	-0.0001234	0.19167	5.93e-05
	0.19333	6.4e-05	0.19333	1.7e-05	0.19333	-9.01e-05	0.19333	5.42e-05
	0.195	7.8e-05	0.195	1.79e-05	0.195	-0.0001048	0.195	7.45e-05
	0.19667	7.9e-05	0.19667	2.17e-05	0.19667	-0.0001461	0.19667	0.0001102
	0.19833	8.65e-05	0.19833	2.81e-05	0.19833	-0.0001721	0.19833	0.0001335
	0.2	8.92e-05	0.2	4.11e-05	0.2	-0.0001779	0.2	4.69e-05
	0.20167	8.27e-05	0.20167	5.22e-05	0.20167	-0.0002437	0.20167	1.91e-05
	0.20333	6.82e-05	0.20333	4.71e-05	0.20333	-0.0002149	0.20333	-8.3e-06
	0.205	6.11e-05	0.205	4.97e-05	0.205	-0.0001289	0.205	-6.96e-05
	0.20667	4.87e-05	0.20667	5.41e-05	0.20667	-4.7e-05	0.20667	-0.0001046
	0.20833	4.24e-05	0.20833	5.57e-05	0.20833	-2.24e-05	0.20833	-6.72e-05
	0.21	4.58e-05	0.21	5.75e-05	0.21	2.59e-05	0.21	-3.63e-05
	0.21167	5.03e-05	0.21167	7.01e-05	0.21167	-1.12e-05	0.21167	-3.58e-05
	0.21333	5.69e-05	0.21333	7.02e-05	0.21333	-0.0001121	0.21333	4.95e-05
	0.215	6.79e-05	0.215	6.8e-05	0.215	-0.00019	0.215	0.0001378
	0.21667	7.75e-05	0.21667	7.2e-05	0.21667	-0.0002055	0.21667	0.0001928
	0.21833	7.16e-05	0.21833	7.96e-05	0.21833	-0.0002252	0.21833	0.0002055
	0.22	6.47e-05	0.22	7.87e-05	0.22	-0.0001952	0.22	0.0002701
	0.22167	5.77e-05	0.22167	8.04e-05	0.22167	-0.0001563	0.22167	0.0002336
	0.22333	5.7e-05	0.22333	8.5e-05	0.22333	-0.0001586	0.22333	0.0001992
	0.225	4.94e-05	0.225	8.11e-05	0.225	-0.0002348	0.225	0.0001994
	0.22667	6.18e-05	0.22667	7.12e-05	0.22667	-0.0002987	0.22667	0.0002251
	0.22833	8.2e-05	0.22833	6.59e-05	0.22833	-0.0003937	0.22833	0.0002333
	0.23	9.08e-05	0.23	6.51e-05	0.23	-0.0004414	0.23	0.000234
	0.23167	9.01e-05	0.23167	6.26e-05	0.23167	-0.0004581	0.23167	0.0001859
	0.23333	8.98e-05	0.23333	5.7e-05	0.23333	-0.0004317	0.23333	0.0001123
	0.235	7.52e-05	0.235	5.87e-05	0.235	-0.000402	0.235	3.42e-05
	0.23667	4.82e-05	0.23667	5.7e-05	0.23667	-0.0003041	0.23667	-7.6e-05
	0.23833	4.14e-05	0.23833	5.89e-05	0.23833	-0.0002535	0.23833	-0.0001624
	0.24	4.81e-05	0.24	5.81e-05	0.24	-0.0002261	0.24	-0.0002211
	0.24167	5.85e-05	0.24167	6.47e-05	0.24167	-0.0001593	0.24167	-0.000253
	0.24333	6.93e-05	0.24333	7.22e-05	0.24333	-0.0001047	0.24333	-0.0003011
	0.245	9.2e-05	0.245	8.01e-05	0.245	-0.000143	0.245	-0.0002986
	0.24667	0.0001045	0.24667	8.03e-05	0.24667	-0.0001698	0.24667	-0.0002773
	0.24833	0.0001008	0.24833	8.54e-05	0.24833	-0.0001764	0.24833	-0.0002324
	0.25	9.93e-05	0.25	9.09e-05	0.25	-0.0002557	0.25	-0.0002124
	0.25167	9.72e-05	0.25167	8.67e-05	0.25167	-0.0003125	0.25167	-0.0001046
	0.25333	8.2e-05	0.25333	8.53e-05	0.25333	-0.0003071	0.25333	-1.48e-05
	0.255	7.01e-05	0.255	8.53e-05	0.255	-0.0002924	0.255	6.56e-05
	0.25667	7.15e-05	0.25667	7.31e-05	0.25667	-0.0002364	0.25667	0.0001445
	0.25833	6.83e-05	0.25833	6.48e-05	0.25833	-9.2e-05	0.25833	0.000228
	0.26	6.96e-05	0.26	5.93e-05	0.26	1.4e-05	0.26	0.0001797
	0.26167	7.66e-05	0.26167	5.39e-05	0.26167	0.0001331	0.26167	0.0001287
	0.26333	7.51e-05	0.26333	5.13e-05	0.26333	0.0002482	0.26333	6.62e-05
	0.265	6.16e-05	0.265	7e-05	0.265	0.0003278	0.265	1.46e-05
	0.26667	5.22e-05	0.26667	7.77e-05	0.26667	0.0003357	0.26667	-8.67e-05
	0.26833	4.23e-05	0.26833	8.42e-05	0.26833	0.0003529	0.26833	-0.000143
	0.27	3.92e-05	0.27	8.73e-05	0.27	0.0002737	0.27	-0.0002252
	0.27167	4.26e-05	0.27167	8.82e-05	0.27167	0.0001498	0.27167	-0.0002697
	0.27333	5.57e-05	0.27333	7.05e-05	0.27333	-2.8e-05	0.27333	-0.0003353
	0.275	6.51e-05	0.275	5.9e-05	0.275	-0.0001931	0.275	-0.0003111
	0.27667	7.33e-05	0.27667	5.91e-05	0.27667	-0.0003226	0.27667	-0.0002325
	0.27833	7.94e-05	0.27833	6.61e-05	0.27833	-0.0003605	0.27833	-0.0001075
	0.28	8.13e-05	0.28	6.81e-05	0.28	-0.0003256	0.28	-4.42e-05
	0.28167	7.96e-05	0.28167	7.8e-05	0.28167	-0.0002493	0.28167	-7.4e-06
	0.28333	8.73e-05	0.28333	8.81e-05	0.28333	-0.0001914	0.28333	-4.41e-05
	0.285	9.6e-05	0.285	9.13e-05	0.285	-0.0001624	0.285	-7.58e-05
	0.28667	9.96e-05	0.28667	8.8e-05	0.28667	-0.0001669	0.28667	-0.000165
	0.28833	0.0001112	0.28833	9.71e-05	0.28833	-0.0002173	0.28833	-0.0001829
	0.29	0.0001153	0.29	0.0001101	0.29	-0.0002423	0.29	-0.0001592
	0.29167	0.0001055	0.29167	0.0001223	0.29167	-0.0002077	0.29167	-6.41e-05
	0.29333	9.39e-05	0.29333	0.0001332	0.29333	-0.0001558	0.29333	-5.17e-05
	0.295	8.27e-05	0.295	0.0001417	0.295	-9.8e-05	0.295	3.8e-06
	0.29667	6.74e-05	0.29667	0.0001422	0.29667	1.3e-06	0.29667	3.23e-05
	0.29833	6.05e-05	0.29833	0.0001352	0.29833	5.84e-05	0.29833	2.25e-05
	0.3	6.31e-05	0.3	0.000122	0.3	4.95e-05	0.3	-1.57e-05
	0.30167	6.47e-05	0.30167	0.0001063	0.30167	1.84e-05	0.30167	-2.43e-05
	0.30333	6.81e-05	0.30333	9.57e-05	0.30333	-2.98e-05	0.30333	-1.7e-05
	0.305	7.03e-05	0.305	8.63e-05	0.305	-0.0001201	0.305	-3.58e-05
	0.30667	7.37e-05	0.30667	7.89e-05	0.30667	-0.000194	0.30667	-2.3e-05
	0.30833	6.89e-05	0.30833	8e-05	0.30833	-0.0002007	0.30833	-6e-07
	0.31	7.42e-05	0.31	8.59e-05	0.31	-0.000203	0.31	7.39e-05
	0.31167	8.71e-05	0.31167	9.27e-05	0.31167	-0.0001956	0.31167	9.79e-05
	0.31333	0.0001016	0.31333	9.91e-05	0.31333	-0.0001484	0.31333	0.0001755
	0.315	0.0001087	0.315	0.0001068	0.315	-0.0001151	0.315	0.0002121
	0.31667	0.0001269	0.31667	0.0001096	0.31667	-0.0001079	0.31667	0.0002359
	0.31833	0.0001285	0.31833	0.0001069	0.31833	-9.73e-05	0.31833	0.0002151
	0.32	0.0001147	0.32	0.0001006	0.32	-7.19e-05	0.32	0.0002197
	0.32167	9.37e-05	0.32167	9.72e-05	0.32167	-0.000121	0.32167	0.0001868
	0.32333	8.08e-05	0.32333	9.21e-05	0.32333	-0.0001325	0.32333	0.000215
	0.325	6.16e-05	0.325	9.72e-05	0.325	-0.0001725	0.325	0.000235
	0.32667	5.29e-05	0.32667	9.85e-05	0.32667	-0.0002095	0.32667	0.0002439
	0.32833	5.31e-05	0.32833	0.0001065	0.32833	-0.0002427	0.32833	0.0002573
	0.33	5.62e-05	0.33	0.0001089	0.33	-0.000209	0.33	0.0002901
	0.33167	4.96e-05	0.33167	0.0001101	0.33167	-0.0001965	0.33167	0.0002862
	0.33333	3.77e-05	0.33333	9.47e-05	0.33333	-0.0001561	0.33333	0.0002737
	0.335	2.39e-05	0.335	9.47e-05	0.335	-0.0001212	0.335	0.0002644
	0.33667	1.75e-05	0.33667	9.41e-05	0.33667	-8.28e-05	0.33667	0.0002522
	0.33833	2.2e-05	0.33833	9.38e-05	0.33833	-5.4e-05	0.33833	0.0001982
	0.34	3.67e-05	0.34	9.04e-05	0.34	-3.67e-05	0.34	0.0001556
	0.34167	6.18e-05	0.34167	0.0001015	0.34167	-3.65e-05	0.34167	0.0001403
	0.34333	8.99e-05	0.34333	9.93e-05	0.34333	9e-07	0.34333	0.0001566
	0.345	0.0001019	0.345	8.71e-05	0.345	1.12e-05	0.345	0.0001727
	0.34667	0.0001056	0.34667	7.9e-05	0.34667	5.1e-05	0.34667	0.0001775
	0.34833	0.0001028	0.34833	8.28e-05	0.34833	8.9e-05	0.34833	0.0001834
	0.35	9.85e-05	0.35	8.24e-05	0.35	0.0001335	0.35	0.0001857
	0.35167	8.57e-05	0.35167	8.37e-05	0.35167	0.000142	0.35167	0.0001358
	0.35333	9.02e-05	0.35333	9.35e-05	0.35333	0.0001557	0.35333	8.43e-05
	0.355	9.64e-05	0.355	0.0001026	0.355	0.0001059	0.355	0.0001167
	0.35667	0.0001058	0.35667	0.0001043	0.35667	7.03e-05	0.35667	0.0001421
	0.35833	0.0001119	0.35833	0.000105	0.35833	4.96e-05	0.35833	0.0001195
	0.36	0.0001257	0.36	0.0001097	0.36	3.4e-06	0.36	0.0001529
	0.36167	0.0001194	0.36167	0.0001146	0.36167	-2.96e-05	0.36167	0.0001776
	0.36333	0.0001128	0.36333	0.0001198	0.36333	-1.39e-05	0.36333	0.000121
	0.365	0.0001034	0.365	0.0001294	0.365	-1.09e-05	0.365	3.72e-05
	0.36667	8.57e-05	0.36667	0.0001351	0.36667	-6.24e-05	0.36667	-1.09e-05
	0.36833	6.61e-05	0.36833	0.000141	0.36833	-5.49e-05	0.36833	-9.03e-05
	0.37	5.73e-05	0.37	0.0001386	0.37	-1.63e-05	0.37	-0.000146
	0.37167	5.13e-05	0.37167	0.0001265	0.37167	2.32e-05	0.37167	-0.0001411
	0.37333	4.95e-05	0.37333	0.0001029	0.37333	9.46e-05	0.37333	-0.0001057
	0.375	5.79e-05	0.375	8.48e-05	0.375	0.0002069	0.375	-5.7e-05
	0.37667	6.22e-05	0.37667	6.55e-05	0.37667	0.0002852	0.37667	-1.46e-05
	0.37833	7.59e-05	0.37833	5.8e-05	0.37833	0.0002881	0.37833	-6e-06
	0.38	8.09e-05	0.38	6.62e-05	0.38	0.0002467	0.38	-3.65e-05
	0.38167	7.67e-05	0.38167	8.6e-05	0.38167	0.0001562	0.38167	-6.93e-05
	0.38333	7.74e-05	0.38333	0.0001044	0.38333	8.56e-05	0.38333	-0.0001108
	0.385	8.55e-05	0.385	0.0001205	0.385	-4.51e-05	0.385	-0.0001238
	0.38667	8e-05	0.38667	0.0001233	0.38667	-0.0001127	0.38667	-7.99e-05
	0.38833	8.04e-05	0.38833	0.0001206	0.38833	-0.0001565	0.38833	-1.92e-05
	0.39	9.41e-05	0.39	0.0001178	0.39	-0.0001394	0.39	4.93e-05
	0.39167	9.82e-05	0.39167	0.000117	0.39167	-0.0001528	0.39167	0.0001372
	0.39333	9.7e-05	0.39333	0.000115	0.39333	-2.86e-05	0.39333	0.0002301
	0.395	0.0001023	0.395	0.0001285	0.395	4.52e-05	0.395	0.0002356
	0.39667	0.000104	0.39667	0.0001439	0.39667	7.29e-05	0.39667	0.0002372
	0.39833	9.62e-05	0.39833	0.0001505	0.39833	6.71e-05	0.39833	0.0002075
	0.4	9.64e-05	0.4	0.0001589	0.4	5.61e-05	0.4	0.0001025
	0.40167	0.0001041	0.40167	0.0001687	0.40167	-2.49e-05	0.40167	-4.33e-05
	0.40333	0.0001099	0.40333	0.0001654	0.40333	-5.91e-05	0.40333	-0.0001366
	0.405	0.0001251	0.405	0.0001523	0.405	-1.72e-05	0.405	-0.0002295
	0.40667	0.0001433	0.40667	0.0001498	0.40667	1.42e-05	0.40667	-0.000293
	0.40833	0.0001525	0.40833	0.000135	0.40833	9.54e-05	0.40833	-0.0002768
	0.41	0.0001491	0.41	0.0001241	0.41	0.0001332	0.41	-0.0002246
	0.41167	0.0001438	0.41167	0.0001221	0.41167	9.64e-05	0.41167	-0.0001634
	0.41333	0.0001321	0.41333	0.0001267	0.41333	2.04e-05	0.41333	-7.49e-05
	0.415	0.0001155	0.415	0.0001201	0.415	-4.55e-05	0.415	1.6e-06
	0.41667	0.0001108	0.41667	0.0001267	0.41667	-0.0001685	0.41667	7.02e-05
	0.41833	0.0001152	0.41833	0.0001367	0.41833	-0.000231	0.41833	0.0001067
	0.42	0.0001179	0.42	0.0001375	0.42	-0.0002292	0.42	9.4e-05
	0.42167	0.0001201	0.42167	0.0001435	0.42167	-0.000215	0.42167	2.99e-05
	0.42333	0.0001322	0.42333	0.0001535	0.42333	-0.0002021	0.42333	-2.57e-05
	0.425	0.0001283	0.425	0.0001535	0.425	-0.0001923	0.425	-0.0001116
	0.42667	0.0001208	0.42667	0.0001425	0.42667	-0.0002044	0.42667	-0.0001851
	0.42833	0.0001178	0.42833	0.0001446	0.42833	-0.0001914	0.42833	-0.0002132
	0.43	0.0001175	0.43	0.0001409	0.43	-0.0001814	0.43	-0.0002401
	0.43167	0.0001042	0.43167	0.0001489	0.43167	-0.0001735	0.43167	-0.0002422
	0.43333	0.0001051	0.43333	0.0001656	0.43333	-0.0001143	0.43333	-0.0002564
	0.435	0.000107	0.435	0.0001882	0.435	-4.7e-05	0.435	-0.0002695
	0.43667	0.0001033	0.43667	0.0001931	0.43667	3.7e-06	0.43667	-0.0002784
	0.43833	9.32e-05	0.43833	0.0001851	0.43833	5.53e-05	0.43833	-0.0002377
	0.44	9.6e-05	0.44	0.0001592	0.44	0.0001475	0.44	-0.0002409
	0.44167	9.05e-05	0.44167	0.000127	0.44167	0.0001951	0.44167	-0.0002013
	0.44333	8.7e-05	0.44333	9.99e-05	0.44333	0.0002367	0.44333	-0.0001352
	0.445	8.49e-05	0.445	8.73e-05	0.445	0.0002037	0.445	-6.59e-05
	0.44667	9.09e-05	0.44667	9.82e-05	0.44667	0.0001868	0.44667	-5.23e-05
	0.44833	9.12e-05	0.44833	0.0001163	0.44833	0.0001052	0.44833	-1.21e-05
	0.45	0.0001045	0.45	0.0001439	0.45	8.84e-05	0.45	-1.2e-05
	0.45167	0.0001137	0.45167	0.0001624	0.45167	6.83e-05	0.45167	3.8e-06
	0.45333	0.0001326	0.45333	0.0001762	0.45333	0.0001251	0.45333	-6.3e-06
	0.455	0.0001411	0.455	0.0001799	0.455	0.0001449	0.455	4.28e-05
	0.45667	0.000155	0.45667	0.000186	0.45667	0.0001933	0.45667	6.3e-05
	0.45833	0.0001442	0.45833	0.0001752	0.45833	0.0001652	0.45833	0.0001046
	0.46	0.0001349	0.46	0.0001663	0.46	0.000128	0.46	4.66e-05
	0.46167	0.0001117	0.46167	0.0001561	0.46167	5.66e-05	0.46167	9.4e-06
	0.46333	9.35e-05	0.46333	0.0001407	0.46333	-1.63e-05	0.46333	-4.61e-05
	0.465	6.98e-05	0.465	0.0001216	0.465	-9.45e-05	0.465	-6.05e-05
	0.46667	7e-05	0.46667	0.000115	0.46667	-0.0001403	0.46667	-6.93e-05
	0.46833	7.74e-05	0.46833	0.0001133	0.46833	-0.0001669	0.46833	4.05e-05
	0.47	9.97e-05	0.47	0.0001192	0.47	-0.0001797	0.47	0.0001207
	0.47167	0.0001251	0.47167	0.0001335	0.47167	-0.0001798	0.47167	0.0001561
	0.47333	0.0001521	0.47333	0.0001512	0.47333	-0.0001685	0.47333	0.0001631
	0.475	0.0001691	0.475	0.0001718	0.475	-0.0001574	0.475	0.0001583
	0.47667	0.0001726	0.47667	0.0001909	0.47667	-0.0001771	0.47667	8.36e-05
	0.47833	0.0001661	0.47833	0.000199	0.47833	-0.000187	0.47833	7.4e-05
	0.48	0.0001576	0.48	0.0002083	0.48	-0.0001697	0.48	0.0001128
	0.48167	0.0001469	0.48167	0.000212	0.48167	-0.0001446	0.48167	0.0001284
	0.48333	0.0001365	0.48333	0.0001997	0.48333	-0.0001017	0.48333	0.0001387
	0.485	0.0001391	0.485	0.0001823	0.485	5.4e-06	0.485	0.0001721
	0.48667	0.000141	0.48667	0.0001713	0.48667	7.87e-05	0.48667	0.0001134
	0.48833	0.0001456	0.48833	0.0001528	0.48833	0.0001419	0.48833	6.03e-05
	0.49	0.0001431	0.49	0.0001335	0.49	0.0001493	0.49	2.41e-05
	0.49167	0.0001382	0.49167	0.0001361	0.49167	0.0001349	0.49167	5.18e-05
	0.49333	0.0001193	0.49333	0.0001446	0.49333	9.36e-05	0.49333	8.12e-05
	0.495	0.0001027	0.495	0.0001499	0.495	8.4e-05	0.495	0.0001565
	0.49667	8.32e-05	0.49667	0.0001557	0.49667	3.91e-05	0.49667	0.0001714
	0.49833	7.61e-05	0.49833	0.0001765	0.49833	0.0001159	0.49833	0.0002329
	0.5	7.32e-05	0.5	0.0001873	0.5	0.0001775	0.5	0.0001969
	0.50167	7.87e-05	0.50167	0.0001952	0.50167	0.0001908	0.50167	0.0001332
	0.50333	8.89e-05	0.50333	0.0001961	0.50333	0.0001938	0.50333	6.61e-05
	0.505	9.63e-05	0.505	0.0001987	0.505	0.0002263	0.505	7.69e-05
	0.50667	9.61e-05	0.50667	0.0001807	0.50667	0.0001383	0.50667	4e-05
	0.50833	9.86e-05	0.50833	0.0001618	0.50833	9.26e-05	0.50833	6.26e-05
	0.51	0.0001082	0.51	0.000143	0.51	9.91e-05	0.51	7.58e-05
	0.51167	0.0001085	0.51167	0.0001349	0.51167	0.0001446	0.51167	0.0001074
	0.51333	0.0001125	0.51333	0.0001255	0.51333	0.0001939	0.51333	4.64e-05
	0.515	0.000126	0.515	0.0001263	0.515	0.0002315	0.515	3.4e-06
	0.51667	0.0001325	0.51667	0.0001278	0.51667	0.0002351	0.51667	-2.09e-05
	0.51833	0.0001235	0.51833	0.0001183	0.51833	0.0002202	0.51833	2.24e-05
	0.52	0.0001265	0.52	0.0001102	0.52	0.0001598	0.52	1.81e-05
	0.52167	0.0001304	0.52167	0.0001058	0.52167	7.52e-05	0.52167	8.44e-05
	0.52333	0.0001244	0.52333	0.0001067	0.52333	8.73e-05	0.52333	0.0001632
	0.525	0.0001196	0.525	0.000111	0.525	8.99e-05	0.525	0.0001899
	0.52667	0.0001247	0.52667	0.0001314	0.52667	9.69e-05	0.52667	0.0001462
	0.52833	0.0001276	0.52833	0.0001477	0.52833	8.86e-05	0.52833	0.0001555
	0.53	0.0001237	0.53	0.0001655	0.53	9.2e-05	0.53	0.0001765
	0.53167	0.0001283	0.53167	0.0001747	0.53167	5.15e-05	0.53167	0.0001773
	0.53333	0.000136	0.53333	0.0001717	0.53333	1.52e-05	0.53333	0.000169
	0.535	0.0001357	0.535	0.0001592	0.535	-1.17e-05	0.535	0.0001827
	0.53667	0.0001206	0.53667	0.0001489	0.53667	-1.92e-05	0.53667	0.0001875
	0.53833	0.0001093	0.53833	0.0001321	0.53833	-7.1e-06	0.53833	0.0001358
	0.54	9.17e-05	0.54	0.0001195	0.54	2.07e-05	0.54	6.32e-05
	0.54167	7.11e-05	0.54167	0.0001209	0.54167	9.74e-05	0.54167	3.58e-05
	0.54333	6.19e-05	0.54333	0.0001297	0.54333	0.0001547	0.54333	3.62e-05
	0.545	6.18e-05	0.545	0.0001302	0.545	0.0002162	0.545	2.31e-05
	0.54667	7.29e-05	0.54667	0.0001363	0.54667	0.0002822	0.54667	4.04e-05
	0.54833	8.87e-05	0.54833	0.0001408	0.54833	0.0003025	0.54833	8.69e-05
	0.55	0.0001063	0.55	0.0001331	0.55	0.0002842	0.55	0.0001111
	0.55167	0.0001231	0.55167	0.0001283	0.55167	0.0002361	0.55167	0.0001145
	0.55333	0.000144	0.55333	0.0001349	0.55333	0.0001926	0.55333	0.0001217
	0.555	0.0001509	0.555	0.0001362	0.555	0.0001206	0.555	0.000154
	0.55667	0.0001444	0.55667	0.0001321	0.55667	9.64e-05	0.55667	0.0001784
	0.55833	0.0001335	0.55833	0.0001441	0.55833	4.52e-05	0.55833	0.0001987
	0.56	0.0001134	0.56	0.0001415	0.56	3.02e-05	0.56	0.000205
	0.56167	9.56e-05	0.56167	0.0001329	0.56167	1.77e-05	0.56167	0.0001931
	0.56333	8.4e-05	0.56333	0.0001289	0.56333	-1e-07	0.56333	0.0001305
	0.565	9.1e-05	0.565	0.0001391	0.565	-4.99e-05	0.565	7.49e-05
	0.56667	0.0001054	0.56667	0.0001311	0.56667	-4.7e-05	0.56667	2.15e-05
	0.56833	0.0001233	0.56833	0.0001459	0.56833	-4.98e-05	0.56833	-8.2e-06
	0.57	0.0001368	0.57	0.0001638	0.57	-5.61e-05	0.57	9e-06
	0.57167	0.0001578	0.57167	0.0001839	0.57167	-4.53e-05	0.57167	8.18e-05
	0.57333	0.0001681	0.57333	0.0001893	0.57333	9.5e-06	0.57333	0.000181
	0.575	0.0001723	0.575	0.0002094	0.575	4.25e-05	0.575	0.0002742
	0.57667	0.0001732	0.57667	0.0002052	0.57667	9.85e-05	0.57667	0.0003609
	0.57833	0.000169	0.57833	0.0001929	0.57833	0.0001212	0.57833	0.000388
	0.58	0.0001533	0.58	0.0001754	0.58	0.0001692	0.58	0.0003659
	0.58167	0.0001439	0.58167	0.0001695	0.58167	0.0001528	0.58167	0.0002921
	0.58333	0.0001391	0.58333	0.0001507	0.58333	8.49e-05	0.58333	0.0002404
	0.585	0.0001359	0.585	0.0001437	0.585	4.98e-05	0.585	0.0001674
	0.58667	0.0001307	0.58667	0.0001544	0.58667	5.9e-05	0.58667	0.0001142
	0.58833	0.0001209	0.58833	0.0001682	0.58833	-1.14e-05	0.58833	0.0001003
	0.59	0.0001007	0.59	0.0001752	0.59	-3.09e-05	0.59	0.0001099
	0.59167	7.77e-05	0.59167	0.0001981	0.59167	2.86e-05	0.59167	0.0001283
	0.59333	5.77e-05	0.59333	0.0002179	0.59333	2.5e-06	0.59333	0.000172
	0.595	4.77e-05	0.595	0.0002181	0.595	-6.37e-05	0.595	0.0002621
	0.59667	4.17e-05	0.59667	0.0002025	0.59667	-6.11e-05	0.59667	0.0002905
	0.59833	4.26e-05	0.59833	0.0001856	0.59833	-9.3e-05	0.59833	0.0002918
	0.6	4.54e-05	0.6	0.0001564	0.6	-0.0001626	0.6	0.0002537
	0.60167	5.39e-05	0.60167	0.0001258	0.60167	-0.0002019	0.60167	0.0001975
	0.60333	6.03e-05	0.60333	0.0001035	0.60333	-0.0001967	0.60333	5.89e-05
	0.605	7.46e-05	0.605	0.0001091	0.605	-0.0001845	0.605	-1.12e-05
	0.60667	8.9e-05	0.60667	0.000121	0.60667	-0.0001244	0.60667	-7.6e-05
	0.60833	9.91e-05	0.60833	0.0001374	0.60833	-5.74e-05	0.60833	-0.0001037
	0.61	9.6e-05	0.61	0.000165	0.61	1.9e-06	0.61	-0.0001305
	0.61167	9.22e-05	0.61167	0.0001907	0.61167	5.11e-05	0.61167	-0.0001047
	0.61333	8.12e-05	0.61333	0.0001972	0.61333	5.56e-05	0.61333	-0.0001282
	0.615	7.34e-05	0.615	0.0002037	0.615	6.31e-05	0.615	-0.000113
	0.61667	7.06e-05	0.61667	0.0002098	0.61667	8.35e-05	0.61667	-0.0001245
	0.61833	6.8e-05	0.61833	0.0001956	0.61833	0.0001067	0.61833	-0.0001193
	0.62	6.78e-05	0.62	0.000183	0.62	0.0001225	0.62	-0.0001054
	0.62167	6.98e-05	0.62167	0.0001782	0.62167	0.0001528	0.62167	-3.77e-05
	0.62333	6.89e-05	0.62333	0.0001604	0.62333	0.0001162	0.62333	-8.6e-06
	0.625	6.69e-05	0.625	0.0001373	0.625	9.01e-05	0.625	1.18e-05
	0.62667	7.58e-05	0.62667	0.0001303	0.62667	0.0001017	0.62667	4.4e-05
	0.62833	7.57e-05	0.62833	0.0001227	0.62833	0.0001214	0.62833	3.06e-05
	0.63	6.77e-05	0.63	0.0001119	0.63	0.0001557	0.63	-5.9e-05
	0.63167	6.4e-05	0.63167	0.000114	0.63167	0.0002292	0.63167	-0.0001191
	0.63333	5.8e-05	0.63333	0.0001163	0.63333	0.0002368	0.63333	-0.0001443
	0.635	5.12e-05	0.635	0.0001221	0.635	0.000245	0.635	-0.000191
	0.63667	5.55e-05	0.63667	0.000132	0.63667	0.0002227	0.63667	-0.0001864
	0.63833	7e-05	0.63833	0.0001429	0.63833	0.0002019	0.63833	-0.0001503
	0.64	7.96e-05	0.64	0.0001473	0.64	0.0001445	0.64	-0.0001253
	0.64167	9.12e-05	0.64167	0.0001629	0.64167	0.0001398	0.64167	-9.99e-05
	0.64333	9.69e-05	0.64333	0.0001659	0.64333	9.6e-05	0.64333	-6.64e-05
	0.645	8.86e-05	0.645	0.0001668	0.645	7.53e-05	0.645	-7.61e-05
	0.64667	8.43e-05	0.64667	0.0001621	0.64667	5.76e-05	0.64667	-6.19e-05
	0.64833	7.28e-05	0.64833	0.0001649	0.64833	0.000117	0.64833	-3.52e-05
	0.65	5.74e-05	0.65	0.000156	0.65	0.0002035	0.65	-3.57e-05
	0.65167	4.39e-05	0.65167	0.0001493	0.65167	0.0003097	0.65167	-4.42e-05
	0.65333	4.46e-05	0.65333	0.0001383	0.65333	0.0003881	0.65333	-9.3e-06
	0.655	3.19e-05	0.655	0.0001407	0.655	0.0004125	0.655	1.66e-05
	0.65667	3e-05	0.65667	0.0001332	0.65667	0.0003639	0.65667	2.44e-05
	0.65833	2.84e-05	0.65833	0.0001327	0.65833	0.00027	0.65833	3.87e-05
	0.66	3.43e-05	0.66	0.0001462	0.66	0.0001466	0.66	7.14e-05
	0.66167	2.58e-05	0.66167	0.0001639	0.66167	9.46e-05	0.66167	8.55e-05
	0.66333	2.76e-05	0.66333	0.0001667	0.66333	0.0001153	0.66333	0.0001085
	0.665	2e-05	0.665	0.0001762	0.665	0.0001469	0.665	0.0001693
	0.66667	2.28e-05	0.66667	0.0001901	0.66667	0.0001981	0.66667	0.0002511
	0.66833	1.94e-05	0.66833	0.000181	0.66833	0.000261	0.66833	0.0003194
	0.67	2.79e-05	0.67	0.0001747	0.67	0.0002646	0.67	0.0003866
	0.67167	3.38e-05	0.67167	0.0001839	0.67167	0.0001933	0.67167	0.0004333
	0.67333	4.7e-05	0.67333	0.0001893	0.67333	0.0001166	0.67333	0.0004347
	0.675	5.2e-05	0.675	0.0001819	0.675	4.09e-05	0.675	0.0004119
	0.67667	5.52e-05	0.67667	0.0001912	0.67667	-3.94e-05	0.67667	0.0003395
	0.67833	5.14e-05	0.67833	0.0001891	0.67833	-0.0001229	0.67833	0.0002558
	0.68	4.64e-05	0.68	0.0001738	0.68	-0.0001584	0.68	0.0001793
	0.68167	4.29e-05	0.68167	0.0001603	0.68167	-0.0001196	0.68167	8.38e-05
	0.68333	3.83e-05	0.68333	0.0001594	0.68333	-8.24e-05	0.68333	-1.41e-05
	0.685	2.95e-05	0.685	0.0001596	0.685	-9e-07	0.685	-4.9e-05
	0.68667	3.18e-05	0.68667	0.0001692	0.68667	8.29e-05	0.68667	-0.0001166
	0.68833	3.63e-05	0.68833	0.0001806	0.68833	0.0001588	0.68833	-0.0001788
	0.69	3.38e-05	0.69	0.0001932	0.69	0.0001661	0.69	-0.0001599
	0.69167	3.19e-05	0.69167	0.0001931	0.69167	0.0001528	0.69167	-0.0001152
	0.69333	3.79e-05	0.69333	0.0001788	0.69333	0.0001115	0.69333	-7.66e-05
	0.695	3.33e-05	0.695	0.0001635	0.695	0.0001097	0.695	4.17e-05
	0.69667	2.38e-05	0.69667	0.0001556	0.69667	0.0001386	0.69667	0.0001764
	0.69833	2.28e-05	0.69833	0.0001484	0.69833	0.0001768	0.69833	0.0002265
	0.7	1.89e-05	0.7	0.0001438	0.7	0.0002316	0.7	0.0002473
	0.70167	5.1e-06	0.70167	0.0001455	0.70167	0.0002645	0.70167	0.0002536
	0.70333	-6.4e-06	0.70333	0.0001472	0.70333	0.0002741	0.70333	0.000203
	0.705	-1.07e-05	0.705	0.0001409	0.705	0.000273	0.705	9.72e-05
	0.70667	-1.98e-05	0.70667	0.0001327	0.70667	0.0002903	0.70667	5.04e-05
	0.70833	-2.58e-05	0.70833	0.0001291	0.70833	0.0003074	0.70833	1.86e-05
	0.71	-1.6e-05	0.71	0.000129	0.71	0.0003465	0.71	-1.39e-05
	0.71167	-1.3e-06	0.71167	0.0001228	0.71167	0.0003567	0.71167	-1.55e-05
	0.71333	6.4e-06	0.71333	0.0001233	0.71333	0.0003008	0.71333	1.69e-05
	0.715	1.2e-05	0.715	0.0001269	0.715	0.0002072	0.715	2.5e-05
	0.71667	2.44e-05	0.71667	0.0001289	0.71667	0.000102	0.71667	5.67e-05
	0.71833	2.11e-05	0.71833	0.000129	0.71833	7.5e-06	0.71833	0.0001013
	0.72	9.6e-06	0.72	0.0001366	0.72	-3.84e-05	0.72	0.0001463
	0.72167	3.4e-06	0.72167	0.0001434	0.72167	-5.07e-05	0.72167	0.0001973
	0.72333	4.2e-06	0.72333	0.0001408	0.72333	-4.91e-05	0.72333	0.0002338
	0.725	4.2e-06	0.725	0.0001373	0.725	-1.48e-05	0.725	0.0002348
	0.72667	1.88e-05	0.72667	0.0001374	0.72667	6.8e-06	0.72667	0.0001856
	0.72833	3.6e-05	0.72833	0.000135	0.72833	-6e-06	0.72833	9.1e-05
	0.73	4.86e-05	0.73	0.000125	0.73	1.39e-05	0.73	-4.3e-06
	0.73167	5.33e-05	0.73167	0.0001266	0.73167	7.37e-05	0.73167	-8.52e-05
	0.73333	4.95e-05	0.73333	0.0001391	0.73333	3.73e-05	0.73333	-0.0001497
	0.735	3.6e-05	0.735	0.000143	0.735	-3.2e-06	0.735	-0.0001201
	0.73667	2.25e-05	0.73667	0.0001479	0.73667	-4.41e-05	0.73667	-3.65e-05
	0.73833	1.42e-05	0.73833	0.0001587	0.73833	-0.0001129	0.73833	5.42e-05
	0.74	4.1e-06	0.74	0.000163	0.74	-0.0002176	0.74	0.000126
	0.74167	-9.4e-06	0.74167	0.0001499	0.74167	-0.0002229	0.74167	0.0001982
	0.74333	-2.04e-05	0.74333	0.0001471	0.74333	-0.0002327	0.74333	0.0001926
	0.745	-2.41e-05	0.745	0.0001452	0.745	-0.0002178	0.745	0.0001339
	0.74667	-2.94e-05	0.74667	0.0001423	0.74667	-0.0002016	0.74667	4.31e-05
	0.74833	-2.82e-05	0.74833	0.000143	0.74833	-0.0001863	0.74833	5.6e-06
	0.75	-1.54e-05	0.75	0.0001591	0.75	-0.0002016	0.75	-7.45e-05
	0.75167	5e-07	0.75167	0.0001653	0.75167	-0.0002252	0.75167	-0.0001146
	0.75333	-7e-07	0.75333	0.0001644	0.75333	-0.0002917	0.75333	-8.55e-05
	0.755	-4.5e-06	0.755	0.0001668	0.755	-0.0002866	0.755	-3.93e-05
	0.75667	-1.42e-05	0.75667	0.0001705	0.75667	-0.0002784	0.75667	-1.2e-05
	0.75833	-2.76e-05	0.75833	0.0001598	0.75833	-0.000283	0.75833	6.37e-05
	0.76	-4.21e-05	0.76	0.0001508	0.76	-0.0002455	0.76	0.0001307
	0.76167	-3.29e-05	0.76167	0.0001575	0.76167	-0.0001464	0.76167	0.000141
	0.76333	-2.54e-05	0.76333	0.0001617	0.76333	-0.0001451	0.76333	0.0001684
	0.765	5e-07	0.765	0.0001604	0.765	-0.0001176	0.765	0.000172
	0.76667	1.99e-05	0.76667	0.0001662	0.76667	-4.96e-05	0.76667	0.0001675
	0.76833	3.38e-05	0.76833	0.0001774	0.76833	2.46e-05	0.76833	0.0001455
	0.77	3.12e-05	0.77	0.0001673	0.77	6.68e-05	0.77	0.0001519
	0.77167	3.21e-05	0.77167	0.0001511	0.77167	0.0001573	0.77167	0.0001614
	0.77333	1.47e-05	0.77333	0.0001345	0.77333	0.0002175	0.77333	0.0001513
	0.775	1.5e-06	0.775	0.0001138	0.775	0.0002459	0.775	0.0001175
	0.77667	-3.1e-06	0.77667	9.53e-05	0.77667	0.0002055	0.77667	0.0001288
	0.77833	-2.8e-06	0.77833	9.15e-05	0.77833	0.0001735	0.77833	0.0001324
	0.78	2.7e-06	0.78	0.0001003	0.78	0.0001048	0.78	0.0001128
	0.78167	1.23e-05	0.78167	0.000117	0.78167	5.68e-05	0.78167	0.0001458
	0.78333	2.38e-05	0.78333	0.000141	0.78333	2.2e-06	0.78333	0.0002178
	0.785	2.73e-05	0.785	0.0001561	0.785	2.62e-05	0.785	0.0002356
	0.78667	2.06e-05	0.78667	0.0001698	0.78667	1.87e-05	0.78667	0.0002761
	0.78833	3.3e-06	0.78833	0.0001728	0.78833	4.79e-05	0.78833	0.0002964
	0.79	-1.31e-05	0.79	0.0001652	0.79	7.27e-05	0.79	0.0002717
	0.79167	-3.14e-05	0.79167	0.0001541	0.79167	0.0001043	0.79167	0.000258
	0.79333	-4.1e-05	0.79333	0.0001473	0.79333	7.95e-05	0.79333	0.0002576
	0.795	-4.08e-05	0.795	0.0001406	0.795	7.89e-05	0.795	0.0001754
	0.79667	-3.1e-05	0.79667	0.00014	0.79667	0.0001008	0.79667	0.000109
	0.79833	-1.97e-05	0.79833	0.0001501	0.79833	0.000102	0.79833	5.33e-05
	0.8	1e-07	0.8	0.0001639	0.8	0.0001375	0.8	-8.4e-05
	0.80167	6.8e-06	0.80167	0.0001771	0.80167	0.0001507	0.80167	-0.0002256
	0.80333	1.84e-05	0.80333	0.0001942	0.80333	0.0002136	0.80333	-0.0002552
	0.805	2.8e-05	0.805	0.0002059	0.805	0.0001895	0.805	-0.0002616
	0.80667	3.61e-05	0.80667	0.000203	0.80667	0.0001856	0.80667	-0.0002188
	0.80833	2.45e-05	0.80833	0.0001993	0.80833	0.0001656	0.80833	-0.0001091
	0.81	2.88e-05	0.81	0.0001922	0.81	0.000193	0.81	2.95e-05
	0.81167	2.16e-05	0.81167	0.0001689	0.81167	0.0001508	0.81167	6.51e-05
	0.81333	1.59e-05	0.81333	0.000149	0.81333	0.0001494	0.81333	0.0001108
	0.815	6.8e-06	0.815	0.0001403	0.815	0.0001274	0.815	8.51e-05
	0.81667	1.4e-05	0.81667	0.0001246	0.81667	5.75e-05	0.81667	5.18e-05
	0.81833	1.15e-05	0.81833	0.0001165	0.81833	-4.06e-05	0.81833	7e-06
	0.82	2.07e-05	0.82	0.0001175	0.82	-0.000161	0.82	3.54e-05
	0.82167	2.56e-05	0.82167	0.0001156	0.82167	-0.0002254	0.82167	2.01e-05
	0.82333	3.42e-05	0.82333	0.0001141	0.82333	-0.0002554	0.82333	7.62e-05
	0.825	3.89e-05	0.825	0.0001138	0.825	-0.0002366	0.825	9.99e-05
	0.82667	3.94e-05	0.82667	0.000106	0.82667	-0.0001859	0.82667	0.000135
	0.82833	3.43e-05	0.82833	9.97e-05	0.82833	-4.93e-05	0.82833	0.0001397
	0.83	2.65e-05	0.83	0.0001005	0.83	1.43e-05	0.83	0.0001724
	0.83167	2.08e-05	0.83167	0.0001	0.83167	4.05e-05	0.83167	0.0001603
	0.83333	1.22e-05	0.83333	0.000115	0.83333	5.87e-05	0.83333	0.0001634
	0.835	1.52e-05	0.835	0.0001371	0.835	6.49e-05	0.835	0.0001402
	0.83667	1.9e-05	0.83667	0.0001538	0.83667	2.44e-05	0.83667	0.0001303
	0.83833	2.16e-05	0.83833	0.0001673	0.83833	-1.12e-05	0.83833	5.3e-05
	0.84	1.57e-05	0.84	0.0001795	0.84	-4.91e-05	0.84	-2.58e-05
	0.84167	9.9e-06	0.84167	0.0001763	0.84167	-0.000113	0.84167	-6.3e-05
	0.84333	-4e-07	0.84333	0.0001578	0.84333	-0.0001895	0.84333	-7.43e-05
	0.845	-1.1e-05	0.845	0.000145	0.845	-0.0003168	0.845	-0.0001112
	0.84667	-1.51e-05	0.84667	0.0001283	0.84667	-0.0004021	0.84667	-2.76e-05
	0.84833	-5.7e-06	0.84833	0.0001085	0.84833	-0.0004731	0.84833	3.39e-05
	0.85	2.5e-06	0.85	9.13e-05	0.85	-0.0004905	0.85	4.52e-05
	0.85167	1.18e-05	0.85167	9.74e-05	0.85167	-0.0004938	0.85167	-1.93e-05
	0.85333	1.47e-05	0.85333	0.0001027	0.85333	-0.0004092	0.85333	-5.02e-05
	0.855	1.44e-05	0.855	0.0001106	0.855	-0.0003175	0.855	-0.00016
	0.85667	1.2e-06	0.85667	0.0001228	0.85667	-0.0002119	0.85667	-0.0002374
	0.85833	-1.14e-05	0.85833	0.0001306	0.85833	-0.0001529	0.85833	-0.0002957
	0.86	-2.35e-05	0.86	0.0001266	0.86	-8.46e-05	0.86	-0.0002415
	0.86167	-2.98e-05	0.86167	0.0001229	0.86167	-1.7e-05	0.86167	-0.0002036
	0.86333	-4.03e-05	0.86333	0.0001236	0.86333	2.06e-05	0.86333	-0.0001239
	0.865	-4.36e-05	0.865	0.000123	0.865	3.68e-05	0.865	1.08e-05
	0.86667	-3.32e-05	0.86667	0.0001298	0.86667	6.83e-05	0.86667	0.0001478
	0.86833	-2.7e-05	0.86833	0.0001313	0.86833	8.43e-05	0.86833	0.0002191
	0.87	-2.85e-05	0.87	0.0001264	0.87	3.42e-05	0.87	0.000264
	0.87167	-2.71e-05	0.87167	0.0001147	0.87167	-5.77e-05	0.87167	0.0002811
	0.87333	-2.64e-05	0.87333	0.0001034	0.87333	-0.0001101	0.87333	0.0001973
	0.875	-3.51e-05	0.875	9.15e-05	0.875	-0.0001674	0.875	0.0001268
	0.87667	-4.56e-05	0.87667	8.41e-05	0.87667	-0.0002003	0.87667	6.49e-05
	0.87833	-4.24e-05	0.87833	9.29e-05	0.87833	-0.000176	0.87833	3.06e-05
	0.88	-3.61e-05	0.88	0.000106	0.88	-0.0001044	0.88	-2.68e-05
	0.88167	-2.51e-05	0.88167	0.0001185	0.88167	-3.93e-05	0.88167	-0.0001016
	0.88333	-2.22e-05	0.88333	0.0001299	0.88333	2e-05	0.88333	-0.0002164
	0.885	-1.2e-05	0.885	0.0001467	0.885	1.07e-05	0.885	-0.0002972
	0.88667	-3.2e-06	0.88667	0.000154	0.88667	-7.05e-05	0.88667	-0.0003555
	0.88833	3.9e-06	0.88833	0.0001547	0.88833	-0.0001092	0.88833	-0.0003669
	0.89	3.6e-06	0.89	0.0001628	0.89	-0.0001593	0.89	-0.0002586
	0.89167	8.4e-06	0.89167	0.0001632	0.89167	-0.0002159	0.89167	-0.0001438
	0.89333	1.08e-05	0.89333	0.0001663	0.89333	-0.0001513	0.89333	-8.13e-05
	0.895	5.4e-06	0.895	0.0001661	0.895	1.67e-05	0.895	-7.07e-05
	0.89667	5.9e-06	0.89667	0.0001724	0.89667	0.0001176	0.89667	-0.0001213
	0.89833	1.04e-05	0.89833	0.0001625	0.89833	0.0001763	0.89833	-0.0001982
	0.9	1.17e-05	0.9	0.0001683	0.9	0.0002904	0.9	-0.0001988
	0.90167	3.1e-06	0.90167	0.000152	0.90167	0.0002995	0.90167	-0.0001717
	0.90333	-2.7e-06	0.90333	0.0001384	0.90333	0.0002366	0.90333	-9.74e-05
	0.905	-1.05e-05	0.905	0.0001223	0.905	0.000208	0.905	5.3e-05
	0.90667	-2.71e-05	0.90667	0.0001227	0.90667	0.0002405	0.90667	0.0001469
	0.90833	-3.38e-05	0.90833	0.0001095	0.90833	0.0002137	0.90833	0.0001592
	0.91	-2.74e-05	0.91	0.0001203	0.91	0.0001827	0.91	0.0001698
	0.91167	-1.96e-05	0.91167	0.0001274	0.91167	0.0001638	0.91167	0.0001472
	0.91333	-2.4e-05	0.91333	0.0001294	0.91333	0.0001047	0.91333	8.05e-05
	0.915	-1.83e-05	0.915	0.0001219	0.915	1.01e-05	0.915	2e-07
	0.91667	-2.04e-05	0.91667	0.0001181	0.91667	-5.13e-05	0.91667	-0.0001046
	0.91833	-2.21e-05	0.91833	0.0001041	0.91833	-4.45e-05	0.91833	-0.0002236
	0.92	-2.95e-05	0.92	9.67e-05	0.92	-5.28e-05	0.92	-0.0002912
	0.92167	-1.67e-05	0.92167	0.0001	0.92167	-5.59e-05	0.92167	-0.0003448
	0.92333	-1.06e-05	0.92333	0.0001002	0.92333	-6.23e-05	0.92333	-0.0003252
	0.925	8e-07	0.925	0.0001062	0.925	-0.0001255	0.925	-0.0002073
	0.92667	1.02e-05	0.92667	0.0001099	0.92667	-0.0002148	0.92667	-7.75e-05
	0.92833	2.52e-05	0.92833	0.0001102	0.92833	-0.0002742	0.92833	-1.66e-05
	0.93	2.89e-05	0.93	0.0001027	0.93	-0.0002747	0.93	4.51e-05
	0.93167	4.04e-05	0.93167	0.000102	0.93167	-0.0002642	0.93167	5.96e-05
	0.93333	4.15e-05	0.93333	9.82e-05	0.93333	-0.0001999	0.93333	6.7e-06
	0.935	3.16e-05	0.935	9.79e-05	0.935	-0.0001599	0.935	-5.41e-05
	0.93667	1.9e-05	0.93667	9.54e-05	0.93667	-0.0001318	0.93667	-7.45e-05
	0.93833	-8.2e-06	0.93833	9.49e-05	0.93833	-0.0001555	0.93833	-0.0001165
	0.94	-3.89e-05	0.94	9.37e-05	0.94	-0.0001755	0.94	-0.0001651
	0.94167	-5.88e-05	0.94167	8.57e-05	0.94167	-0.0001607	0.94167	-0.0002018
	0.94333	-6.77e-05	0.94333	8.08e-05	0.94333	-0.0001708	0.94333	-0.0002286
	0.945	-7.55e-05	0.945	7.83e-05	0.945	-0.0001981	0.945	-0.0002941
	0.94667	-6.36e-05	0.94667	8.28e-05	0.94667	-0.0002033	0.94667	-0.0003263
	0.94833	-6.03e-05	0.94833	8.52e-05	0.94833	-0.0002009	0.94833	-0.0002818
	0.95	-5.85e-05	0.95	9.72e-05	0.95	-0.0002716	0.95	-0.0002051
	0.95167	-5.99e-05	0.95167	9.39e-05	0.95167	-0.0002431	0.95167	-0.0001253
	0.95333	-6.71e-05	0.95333	0.0001002	0.95333	-0.0001371	0.95333	-1.4e-05
	0.955	-7.22e-05	0.955	9.37e-05	0.955	-1.1e-05	0.955	9.17e-05
	0.95667	-7.11e-05	0.95667	9.37e-05	0.95667	6.04e-05	0.95667	0.0001196
	0.95833	-7.38e-05	0.95833	8.54e-05	0.95833	0.000155	0.95833	9.32e-05
	0.96	-7.99e-05	0.96	0.0001002	0.96	0.0001734	0.96	7.54e-05
	0.96167	-7.5e-05	0.96167	9.85e-05	0.96167	0.0001027	0.96167	7.7e-05
	0.96333	-8.89e-05	0.96333	0.0001058	0.96333	4e-06	0.96333	2.51e-05
	0.965	-9.57e-05	0.965	0.0001023	0.965	-2.62e-05	0.965	-5.4e-06
	0.96667	-9.96e-05	0.96667	0.0001108	0.96667	-2.3e-05	0.96667	-2.62e-05
	0.96833	-9.21e-05	0.96833	0.0001037	0.96833	-6e-07	0.96833	-5.35e-05
	0.97	-9.25e-05	0.97	0.0001078	0.97	2.5e-05	0.97	-9.88e-05
	0.97167	-7.45e-05	0.97167	0.0001087	0.97167	1.71e-05	0.97167	-5.95e-05
	0.97333	-6.43e-05	0.97333	0.0001182	0.97333	-1.61e-05	0.97333	-3.74e-05
	0.975	-5.46e-05	0.975	0.0001186	0.975	-8.47e-05	0.975	-6.8e-06
	0.97667	-5.28e-05	0.97667	0.0001226	0.97667	-0.0001113	0.97667	-2.45e-05
	0.97833	-5.03e-05	0.97833	0.0001212	0.97833	-0.0001352	0.97833	-7.76e-05
	0.98	-5.78e-05	0.98	0.0001225	0.98	-0.0001195	0.98	-0.0001794
	0.98167	-6.29e-05	0.98167	0.0001184	0.98167	-0.0001001	0.98167	-0.0002776
	0.98333	-7.06e-05	0.98333	0.0001183	0.98333	-9.83e-05	0.98333	-0.0003451
	0.985	-7.97e-05	0.985	0.0001107	0.985	-0.0001491	0.985	-0.0003415
	0.98667	-8.1e-05	0.98667	0.0001069	0.98667	-0.0001405	0.98667	-0.000278
	0.98833	-7.62e-05	0.98833	0.0001051	0.98833	-0.0001341	0.98833	-0.0002133
	0.99	-6.63e-05	0.99	0.000108	0.99	-0.0001369	0.99	-0.000155
	0.99167	-4.86e-05	0.99167	0.0001063	0.99167	-0.0001228	0.99167	-0.0001061
	0.99333	-3.4e-05	0.99333	0.0001171	0.99333	-7.55e-05	0.99333	-8.8e-05
	0.995	-2.37e-05	0.995	0.0001219	0.995	-8.02e-05	0.995	-8.77e-05
	0.99667	-1.96e-05	0.99667	0.0001186	0.99667	-8.36e-05	0.99667	-8.49e-05
	0.99833	-2.09e-05	0.99833	0.000113	0.99833	-7.84e-05	0.99833	-5.26e-05
	1	-3.16e-05	1	0.0001095	1	-3.31e-05	1	-7.48e-05
	1.00167	-3.28e-05	1.00167	0.0001029	1.00167	-6.3e-05	1.00167	-0.000137
	1.00333	-3.21e-05	1.00333	9.85e-05	1.00333	-4.01e-05	1.00333	-0.0002434
	1.005	-2.91e-05	1.005	0.0001057	1.005	-3e-06	1.005	-0.0003444
	1.00667	-3.32e-05	1.00667	0.000112	1.00667	8.1e-06	1.00667	-0.0004362
	1.00833	-3.39e-05	1.00833	0.0001219	1.00833	-1.52e-05	1.00833	-0.0005038
	1.01	-3.87e-05	1.01	0.000131	1.01	3.67e-05	1.01	-0.0004719
	1.01167	-5.11e-05	1.01167	0.0001463	1.01167	1.53e-05	1.01167	-0.0003712
	1.01333	-5.62e-05	1.01333	0.0001478	1.01333	-1.17e-05	1.01333	-0.0002741
	1.015	-5.74e-05	1.015	0.000149	1.015	8.3e-06	1.015	-0.0002101
	1.01667	-5.73e-05	1.01667	0.0001455	1.01667	5.74e-05	1.01667	-7.8e-05
	1.01833	-5.86e-05	1.01833	0.0001361	1.01833	8.11e-05	1.01833	-4.03e-05
	1.02	-5.63e-05	1.02	0.000126	1.02	0.0001667	1.02	-3.58e-05
	1.02167	-6.21e-05	1.02167	0.0001166	1.02167	0.000201	1.02167	-3.22e-05
	1.02333	-5.54e-05	1.02333	0.0001121	1.02333	0.0002031	1.02333	-8.7e-06
	1.025	-5.32e-05	1.025	0.0001085	1.025	0.0001436	1.025	-3.65e-05
	1.02667	-4.65e-05	1.02667	0.0001089	1.02667	8.49e-05	1.02667	-4.29e-05
	1.02833	-3.5e-05	1.02833	0.0001018	1.02833	-1.39e-05	1.02833	-8.62e-05
	1.03	-2.82e-05	1.03	0.0001068	1.03	-7e-05	1.03	-0.0001215
	1.03167	-3.79e-05	1.03167	0.0001044	1.03167	-9.82e-05	1.03167	-0.0001406
	1.03333	-4.48e-05	1.03333	9.77e-05	1.03333	-7.59e-05	1.03333	-0.0001634
	1.035	-5.94e-05	1.035	9.46e-05	1.035	-7.38e-05	1.035	-0.0001416
	1.03667	-8.15e-05	1.03667	9.52e-05	1.03667	-1.03e-05	1.03667	-0.0001149
	1.03833	-8.81e-05	1.03833	8.54e-05	1.03833	7.33e-05	1.03833	-8.63e-05
	1.04	-8.81e-05	1.04	7.72e-05	1.04	0.0001112	1.04	-8.19e-05
	1.04167	-7.92e-05	1.04167	7.16e-05	1.04167	0.0001041	1.04167	-8.53e-05
	1.04333	-6.18e-05	1.04333	6.31e-05	1.04333	0.0001321	1.04333	-0.0001563
	1.045	-3.57e-05	1.045	5.36e-05	1.045	5.32e-05	1.045	-0.0001252
	1.04667	-2.69e-05	1.04667	5.17e-05	1.04667	-6.05e-05	1.04667	-0.0001226
	1.04833	-1.63e-05	1.04833	5.15e-05	1.04833	-0.0001145	1.04833	-0.0001337
	1.05	-2.1e-05	1.05	6.05e-05	1.05	-0.0001416	1.05	-0.0001165
	1.05167	-3.5e-05	1.05167	6.78e-05	1.05167	-0.0002028	1.05167	-4.35e-05
	1.05333	-6.24e-05	1.05333	7.76e-05	1.05333	-0.0001709	1.05333	-5.29e-05
	1.055	-6.8e-05	1.055	7.35e-05	1.055	-0.0001484	1.055	-7.4e-06
	1.05667	-7.71e-05	1.05667	7.36e-05	1.05667	-0.0002008	1.05667	5.88e-05
	1.05833	-7.35e-05	1.05833	6.54e-05	1.05833	-0.0002315	1.05833	0.0001113
	1.06	-5.91e-05	1.06	6.3e-05	1.06	-0.0002219	1.06	0.0001548
	1.06167	-2.77e-05	1.06167	5.23e-05	1.06167	-0.0002257	1.06167	0.0002343
	1.06333	-1.43e-05	1.06333	6.08e-05	1.06333	-0.0001772	1.06333	0.0002409
	1.065	-1e-06	1.065	5.72e-05	1.065	-3.13e-05	1.065	0.0001942
	1.06667	-5e-07	1.06667	5.35e-05	1.06667	7.7e-05	1.06667	0.000103
	1.06833	-8.6e-06	1.06833	3.96e-05	1.06833	0.0001375	1.06833	-6.6e-06
	1.07	-2.97e-05	1.07	4e-05	1.07	0.000167	1.07	-0.0001629
	1.07167	-4.75e-05	1.07167	3.63e-05	1.07167	0.0001814	1.07167	-0.0002609
	1.07333	-5.17e-05	1.07333	4.32e-05	1.07333	0.0001075	1.07333	-0.0002764
	1.075	-4.8e-05	1.075	6.03e-05	1.075	5.4e-05	1.075	-0.0002339
	1.07667	-3.52e-05	1.07667	8.58e-05	1.07667	0.0001017	1.07667	-0.0001847
	1.07833	-2.33e-05	1.07833	0.0001001	1.07833	0.0001308	1.07833	-0.0001294
	1.08	-5.5e-06	1.08	9.77e-05	1.08	0.0001127	1.08	-0.0001082
	1.08167	-5.3e-06	1.08167	9.73e-05	1.08167	9.6e-05	1.08167	-0.0001284
	1.08333	-4.4e-06	1.08333	7.69e-05	1.08333	9.79e-05	1.08333	-0.0001356
	1.085	-1.8e-05	1.085	5.84e-05	1.085	4.7e-06	1.085	-0.0001486
	1.08667	-2.17e-05	1.08667	5.03e-05	1.08667	-4.38e-05	1.08667	-0.0001565
	1.08833	-3.17e-05	1.08833	6.13e-05	1.08833	-3.68e-05	1.08833	-0.0001403
	1.09	-3.19e-05	1.09	6.87e-05	1.09	3.64e-05	1.09	-0.0001353
	1.09167	-3.61e-05	1.09167	9.07e-05	1.09167	8.29e-05	1.09167	-0.0001782
	1.09333	-2.75e-05	1.09333	0.0001093	1.09333	0.0001619	1.09333	-0.0002031
	1.095	-2.09e-05	1.095	0.0001136	1.095	0.0002217	1.095	-0.0001933
	1.09667	-1.77e-05	1.09667	0.0001138	1.09667	0.0002433	1.09667	-0.0002332
	1.09833	-1.58e-05	1.09833	0.0001132	1.09833	0.000209	1.09833	-0.0002008
	1.1	-5.1e-06	1.1	0.000106	1.1	0.0001738	1.1	-0.0001437
	1.10167	-2.4e-06	1.10167	9.44e-05	1.10167	0.0001047	1.10167	-0.0001277
	1.10333	-1.3e-06	1.10333	9.71e-05	1.10333	3.47e-05	1.10333	-0.0001106
	1.105	1.08e-05	1.105	9.74e-05	1.105	-2.89e-05	1.105	-1.27e-05
	1.10667	1.47e-05	1.10667	9.35e-05	1.10667	-4.39e-05	1.10667	-1.08e-05
	1.10833	1.01e-05	1.10833	0.000101	1.10833	-8.1e-05	1.10833	-4.26e-05
	1.11	8.5e-06	1.11	0.0001138	1.11	-0.0001245	1.11	-5.57e-05
	1.11167	3.1e-06	1.11167	0.0001102	1.11167	-0.0001506	1.11167	-0.0001135
	1.11333	-1.16e-05	1.11333	0.0001013	1.11333	-0.0001584	1.11333	-0.0002007
	1.115	-2.21e-05	1.115	9.19e-05	1.115	-0.0001969	1.115	-0.0002451
	1.11667	-3.26e-05	1.11667	7.63e-05	1.11667	-0.0001534	1.11667	-0.0002244
	1.11833	-4.65e-05	1.11833	5.36e-05	1.11833	-7.71e-05	1.11833	-0.0001476
	1.12	-6.05e-05	1.12	4.59e-05	1.12	-3.12e-05	1.12	-6.11e-05
	1.12167	-6.92e-05	1.12167	4.77e-05	1.12167	1.57e-05	1.12167	-1.14e-05
	1.12333	-7.65e-05	1.12333	5.97e-05	1.12333	3.68e-05	1.12333	4.52e-05
	1.125	-8.14e-05	1.125	6.12e-05	1.125	2.18e-05	1.125	4.7e-05
	1.12667	-7.98e-05	1.12667	7.36e-05	1.12667	3.66e-05	1.12667	2.5e-06
	1.12833	-8.23e-05	1.12833	8.4e-05	1.12833	7.99e-05	1.12833	-1.78e-05
	1.13	-9.02e-05	1.13	7.85e-05	1.13	9.93e-05	1.13	-5.9e-06
	1.13167	-9.55e-05	1.13167	6.91e-05	1.13167	0.0001629	1.13167	-2.97e-05
	1.13333	-9.63e-05	1.13333	7.38e-05	1.13333	0.0001774	1.13333	-4.18e-05
	1.135	-9.75e-05	1.135	7.59e-05	1.135	0.000155	1.135	-7.29e-05
	1.13667	-9.11e-05	1.13667	7.39e-05	1.13667	0.0001168	1.13667	-0.0001033
	1.13833	-8.06e-05	1.13833	9.16e-05	1.13833	7.09e-05	1.13833	-0.0001357
	1.14	-7.68e-05	1.14	0.0001059	1.14	2.75e-05	1.14	-0.0001342
	1.14167	-8.7e-05	1.14167	0.0001089	1.14167	-6.4e-06	1.14167	-0.0001034
	1.14333	-0.0001009	1.14333	0.0001052	1.14333	-5.4e-06	1.14333	-2.54e-05
	1.145	-0.0001148	1.145	0.0001006	1.145	-1.04e-05	1.145	1.39e-05
	1.14667	-0.0001267	1.14667	8.06e-05	1.14667	3.52e-05	1.14667	5.5e-05
	1.14833	-0.0001289	1.14833	6.44e-05	1.14833	6.15e-05	1.14833	8.68e-05
	1.15	-0.000117	1.15	6.08e-05	1.15	6.9e-05	1.15	6.46e-05
	1.15167	-9.85e-05	1.15167	6.19e-05	1.15167	1.17e-05	1.15167	7.9e-06
	1.15333	-7.98e-05	1.15333	6.21e-05	1.15333	-1.24e-05	1.15333	-2.04e-05
	1.155	-6.47e-05	1.155	6.51e-05	1.155	-8.58e-05	1.155	-5.55e-05
	1.15667	-5.43e-05	1.15667	6.27e-05	1.15667	-0.0001368	1.15667	-0.0001035
	1.15833	-4.2e-05	1.15833	5.07e-05	1.15833	-0.0001283	1.15833	-0.0001131
	1.16	-4.01e-05	1.16	3.87e-05	1.16	-5.99e-05	1.16	-0.0001227
	1.16167	-3.4e-05	1.16167	2.58e-05	1.16167	1.79e-05	1.16167	-0.000131
	1.16333	-3.05e-05	1.16333	2.72e-05	1.16333	9.98e-05	1.16333	-0.0001418
	1.165	-2.38e-05	1.165	2.54e-05	1.165	0.0001094	1.165	-9.25e-05
	1.16667	-3.07e-05	1.16667	3.06e-05	1.16667	9.44e-05	1.16667	-3.35e-05
	1.16833	-2.87e-05	1.16833	2.86e-05	1.16833	2.34e-05	1.16833	5.3e-05
	1.17	-3.45e-05	1.17	3.61e-05	1.17	-7.27e-05	1.17	0.0001617
	1.17167	-3.77e-05	1.17167	3.49e-05	1.17167	-0.0001451	1.17167	0.000302
	1.17333	-5.47e-05	1.17333	4.51e-05	1.17333	-0.0001373	1.17333	0.0003747
	1.175	-6.04e-05	1.175	4.58e-05	1.175	-7.25e-05	1.175	0.0004018
	1.17667	-7.07e-05	1.17667	5.62e-05	1.17667	3.67e-05	1.17667	0.0003989
	1.17833	-7.67e-05	1.17833	5.91e-05	1.17833	0.0001278	1.17833	0.0003039
	1.18	-8.31e-05	1.18	5.55e-05	1.18	0.0002195	1.18	0.0001716
	1.18167	-6.94e-05	1.18167	4.94e-05	1.18167	0.0002847	1.18167	8.2e-05
	1.18333	-6.53e-05	1.18333	4.98e-05	1.18333	0.0002854	1.18333	1.92e-05
	1.185	-6.45e-05	1.185	3.99e-05	1.185	0.0002709	1.185	-4.51e-05
	1.18667	-6.85e-05	1.18667	3.54e-05	1.18667	0.0002444	1.18667	-8.8e-06
	1.18833	-5.73e-05	1.18833	3.34e-05	1.18833	0.000178	1.18833	1.23e-05
	1.19	-6.63e-05	1.19	2.86e-05	1.19	9.83e-05	1.19	-2e-05
	1.19167	-7.43e-05	1.19167	1.9e-05	1.19167	4.37e-05	1.19167	-4.34e-05
	1.19333	-7.42e-05	1.19333	1.59e-05	1.19333	-2.7e-06	1.19333	-3.12e-05
	1.195	-6.58e-05	1.195	1.59e-05	1.195	-1.41e-05	1.195	-7.92e-05
	1.19667	-8.64e-05	1.19667	2.06e-05	1.19667	3e-07	1.19667	-0.0001065
	1.19833	-9.18e-05	1.19833	1.78e-05	1.19833	3.51e-05	1.19833	-0.0001082
	1.2	-8.7e-05	1.2	2.37e-05	1.2	5.33e-05	1.2	-0.0001056
	1.20167	-9e-05	1.20167	3.2e-05	1.20167	6.58e-05	1.20167	-0.0001308
	1.20333	-0.0001056	1.20333	2.62e-05	1.20333	6.59e-05	1.20333	-0.0001059
	1.205	-0.0001017	1.205	1.65e-05	1.205	9.96e-05	1.205	-8.86e-05
	1.20667	-0.000108	1.20667	1.64e-05	1.20667	0.0001136	1.20667	-4.85e-05
	1.20833	-0.0001267	1.20833	9.5e-06	1.20833	0.0001428	1.20833	-4.74e-05
	1.21	-0.0001448	1.21	4.5e-06	1.21	0.0001727	1.21	-5.52e-05
	1.21167	-0.0001531	1.21167	1.38e-05	1.21167	0.0002146	1.21167	-9.5e-05
	1.21333	-0.0001563	1.21333	2.88e-05	1.21333	0.0002092	1.21333	-0.0001245
	1.215	-0.000151	1.215	5e-05	1.215	0.0001945	1.215	-0.0001464
	1.21667	-0.0001352	1.21667	6.89e-05	1.21667	0.0001664	1.21667	-0.0001154
	1.21833	-0.0001115	1.21833	8.24e-05	1.21833	0.0001239	1.21833	-6.48e-05
	1.22	-9.54e-05	1.22	8.4e-05	1.22	4.92e-05	1.22	-2.5e-06
	1.22167	-9.48e-05	1.22167	7.85e-05	1.22167	-2.21e-05	1.22167	6.72e-05
	1.22333	-9.59e-05	1.22333	5.64e-05	1.22333	-4.32e-05	1.22333	9.62e-05
	1.225	-0.0001047	1.225	4.43e-05	1.225	-9.48e-05	1.225	8.62e-05
	1.22667	-0.0001143	1.22667	3.41e-05	1.22667	-0.0001644	1.22667	4.14e-05
	1.22833	-0.0001208	1.22833	3.18e-05	1.22833	-0.0001825	1.22833	1.38e-05
	1.23	-0.0001167	1.23	2.88e-05	1.23	-0.000144	1.23	-1.78e-05
	1.23167	-0.000119	1.23167	3.59e-05	1.23167	-0.0001325	1.23167	-3.63e-05
	1.23333	-0.0001168	1.23333	3.69e-05	1.23333	-8.69e-05	1.23333	-5.38e-05
	1.235	-0.0001218	1.235	3.64e-05	1.235	-7.3e-06	1.235	9.2e-06
	1.23667	-0.0001199	1.23667	3.64e-05	1.23667	9.7e-06	1.23667	3.32e-05
	1.23833	-0.0001184	1.23833	4.45e-05	1.23833	-5.89e-05	1.23833	5.08e-05
	1.24	-0.0001045	1.24	5.09e-05	1.24	-0.0001476	1.24	9.46e-05
	1.24167	-8.88e-05	1.24167	5.6e-05	1.24167	-0.0002471	1.24167	0.0001716
	1.24333	-7.02e-05	1.24333	6.53e-05	1.24333	-0.0003062	1.24333	0.0001802
	1.245	-5.47e-05	1.245	6.9e-05	1.245	-0.0003414	1.245	0.0001777
	1.24667	-4.24e-05	1.24667	6.69e-05	1.24667	-0.0003238	1.24667	0.0002056
	1.24833	-3.86e-05	1.24833	6.32e-05	1.24833	-0.0002884	1.24833	0.0002064
	1.25	-4.53e-05	1.25	6.24e-05	1.25	-0.0002315	1.25	0.0001941
	1.25167	-5.22e-05	1.25167	4.87e-05	1.25167	-0.0002473	1.25167	0.000185
	1.25333	-6.4e-05	1.25333	4.25e-05	1.25333	-0.0001997	1.25333	0.0001929
	1.255	-8.09e-05	1.255	3.82e-05	1.255	-0.0001493	1.255	0.0001397
	1.25667	-9.95e-05	1.25667	3.76e-05	1.25667	-0.0001003	1.25667	7.33e-05
	1.25833	-0.0001093	1.25833	3.75e-05	1.25833	-5.6e-06	1.25833	1.54e-05
	1.26	-0.0001125	1.26	5.01e-05	1.26	0.0001067	1.26	-3.5e-06
	1.26167	-0.0001128	1.26167	4.28e-05	1.26167	0.0001206	1.26167	9.9e-06
	1.26333	-0.0001085	1.26333	2.95e-05	1.26333	0.0001189	1.26333	6.87e-05
	1.265	-0.0001	1.265	1.43e-05	1.265	0.000108	1.265	0.0001447
	1.26667	-8.92e-05	1.26667	-9e-07	1.26667	1.2e-06	1.26667	0.0001528
	1.26833	-8.94e-05	1.26833	-1.89e-05	1.26833	-8.8e-05	1.26833	0.0001159
	1.27	-8.87e-05	1.27	-2.02e-05	1.27	-0.0001096	1.27	6.41e-05
	1.27167	-8.61e-05	1.27167	-1.15e-05	1.27167	-0.0001442	1.27167	-2.3e-06
	1.27333	-8.4e-05	1.27333	-3.3e-06	1.27333	-0.000163	1.27333	-4.8e-05
	1.275	-9.3e-05	1.275	7.4e-06	1.275	-0.0001428	1.275	-2.38e-05
	1.27667	-9.79e-05	1.27667	2.21e-05	1.27667	-0.0001042	1.27667	1.88e-05
	1.27833	-0.0001092	1.27833	3.49e-05	1.27833	-9.84e-05	1.27833	3.37e-05
	1.28	-0.000129	1.28	5.07e-05	1.28	-6.59e-05	1.28	7.28e-05
	1.28167	-0.0001479	1.28167	6.43e-05	1.28167	-5.41e-05	1.28167	5.27e-05
	1.28333	-0.0001547	1.28333	6.72e-05	1.28333	-1.58e-05	1.28333	1.19e-05
	1.285	-0.0001512	1.285	6.03e-05	1.285	-1.31e-05	1.285	-4.7e-06
	1.28667	-0.0001365	1.28667	6.28e-05	1.28667	-4.51e-05	1.28667	1.6e-06
	1.28833	-0.0001081	1.28833	4.9e-05	1.28833	-6.87e-05	1.28833	-3.62e-05
	1.29	-8.6e-05	1.29	4.42e-05	1.29	-6.63e-05	1.29	-3e-05
	1.29167	-6.25e-05	1.29167	5.14e-05	1.29167	-0.0001352	1.29167	-3.35e-05
	1.29333	-5.17e-05	1.29333	6.51e-05	1.29333	-0.0001978	1.29333	-8.31e-05
	1.295	-5.02e-05	1.295	5.86e-05	1.295	-0.0001839	1.295	-0.0001248
	1.29667	-5.45e-05	1.29667	6.62e-05	1.29667	-0.0001759	1.29667	-0.0001594
	1.29833	-5.14e-05	1.29833	5.88e-05	1.29833	-0.0002027	1.29833	-0.0001512
	1.3	-5.98e-05	1.3	4.19e-05	1.3	-0.0001743	1.3	-0.0001067
	1.30167	-6.93e-05	1.30167	2.87e-05	1.30167	-0.000131	1.30167	-3e-05
	1.30333	-7.71e-05	1.30333	3.01e-05	1.30333	-9.66e-05	1.30333	3.91e-05
	1.305	-8.99e-05	1.305	2.29e-05	1.305	-9.97e-05	1.305	0.0001405
	1.30667	-0.0001046	1.30667	2.19e-05	1.30667	-8.86e-05	1.30667	0.0001505
	1.30833	-0.000108	1.30833	2.63e-05	1.30833	-7.92e-05	1.30833	0.0001105
	1.31	-0.0001088	1.31	2.36e-05	1.31	-2.67e-05	1.31	4.66e-05
	1.31167	-0.0001065	1.31167	1.22e-05	1.31167	1.82e-05	1.31167	-4.98e-05
	1.31333	-0.0001011	1.31333	6.2e-06	1.31333	7.47e-05	1.31333	-0.0001467
	1.315	-9.84e-05	1.315	7.2e-06	1.315	0.0001605	1.315	-0.0001581
	1.31667	-0.0001035	1.31667	1.9e-06	1.31667	0.0002376	1.31667	-0.000125
	1.31833	-0.0001057	1.31833	4.1e-06	1.31833	0.0001921	1.31833	-0.000105
	1.32	-0.0001037	1.32	1.04e-05	1.32	7.61e-05	1.32	-9.1e-06
	1.32167	-0.0001021	1.32167	1.99e-05	1.32167	-1.88e-05	1.32167	4.09e-05
	1.32333	-9.88e-05	1.32333	3.12e-05	1.32333	-0.0001563	1.32333	5.13e-05
	1.325	-9.34e-05	1.325	4.94e-05	1.325	-0.000307	1.325	3.18e-05
	1.32667	-8.63e-05	1.32667	5.82e-05	1.32667	-0.000362	1.32667	3.74e-05
	1.32833	-8.89e-05	1.32833	6.95e-05	1.32833	-0.0003478	1.32833	-4.68e-05
	1.33	-9.34e-05	1.33	6.84e-05	1.33	-0.0003148	1.33	-8.16e-05
	1.33167	-9.54e-05	1.33167	5.22e-05	1.33167	-0.000214	1.33167	-0.0001293
	1.33333	-9.9e-05	1.33333	3.34e-05	1.33333	-9.39e-05	1.33333	-0.0001707
	1.335	-0.0001055	1.335	1.61e-05	1.335	-1.99e-05	1.335	-0.0001604
	1.33667	-0.0001081	1.33667	-6.3e-06	1.33667	6.71e-05	1.33667	-8.27e-05
	1.33833	-9.96e-05	1.33833	-1.29e-05	1.33833	0.0001128	1.33833	-3.89e-05
	1.34	-9.32e-05	1.34	-1.26e-05	1.34	7.6e-05	1.34	-1.55e-05
	1.34167	-9.17e-05	1.34167	-7.7e-06	1.34167	6.62e-05	1.34167	3.53e-05
	1.34333	-9.21e-05	1.34333	5.7e-06	1.34333	0.0001071	1.34333	2.65e-05
	1.345	-8.94e-05	1.345	2.3e-05	1.345	8.4e-05	1.345	1.51e-05
	1.34667	-9.96e-05	1.34667	2.62e-05	1.34667	6.18e-05	1.34667	2e-06
	1.34833	-0.0001152	1.34833	3.18e-05	1.34833	0.0001138	1.34833	3.2e-06
	1.35	-0.000118	1.35	3.42e-05	1.35	8.71e-05	1.35	-5.97e-05
	1.35167	-0.0001195	1.35167	3.07e-05	1.35167	1.15e-05	1.35167	-0.0001136
	1.35333	-0.0001193	1.35333	3.06e-05	1.35333	-1.84e-05	1.35333	-0.0002033
	1.355	-0.0001149	1.355	4.57e-05	1.355	-3.88e-05	1.355	-0.0002493
	1.35667	-0.0001011	1.35667	6.36e-05	1.35667	-0.0001177	1.35667	-0.0002675
	1.35833	-9.3e-05	1.35833	7.1e-05	1.35833	-0.0001317	1.35833	-0.0002375
	1.36	-9.57e-05	1.36	8.16e-05	1.36	-0.0001167	1.36	-0.000207
	1.36167	-0.0001057	1.36167	8.18e-05	1.36167	-6.71e-05	1.36167	-0.0001935
	1.36333	-0.000115	1.36333	6.11e-05	1.36333	-4.63e-05	1.36333	-0.0002429
	1.365	-0.0001334	1.365	2.96e-05	1.365	-1.22e-05	1.365	-0.0002932
	1.36667	-0.0001575	1.36667	1.72e-05	1.36667	-4.4e-06	1.36667	-0.0003128
	1.36833	-0.0001549	1.36833	1.7e-06	1.36833	-1.53e-05	1.36833	-0.0003632
	1.37	-0.0001501	1.37	-1.13e-05	1.37	-7.7e-05	1.37	-0.0003803
	1.37167	-0.0001438	1.37167	-1.28e-05	1.37167	-5.16e-05	1.37167	-0.0003668
	1.37333	-0.000133	1.37333	-2.6e-06	1.37333	-7.4e-06	1.37333	-0.000354
	1.375	-0.0001119	1.375	-6.1e-06	1.375	3.87e-05	1.375	-0.0004117
	1.37667	-0.0001206	1.37667	-1.34e-05	1.37667	0.0001144	1.37667	-0.0004226
	1.37833	-0.0001332	1.37833	-1.23e-05	1.37833	0.0001554	1.37833	-0.0004212
	1.38	-0.0001505	1.38	-5.5e-06	1.38	0.0001452	1.38	-0.0004103
	1.38167	-0.0001577	1.38167	-3.8e-06	1.38167	9.15e-05	1.38167	-0.0004149
	1.38333	-0.0001718	1.38333	-1e-06	1.38333	4.93e-05	1.38333	-0.0003877
	1.385	-0.0001568	1.385	8.2e-06	1.385	-2.86e-05	1.385	-0.0003808
	1.38667	-0.0001397	1.38667	1.57e-05	1.38667	-7.56e-05	1.38667	-0.0003868
	1.38833	-0.0001182	1.38833	1.67e-05	1.38833	-0.0001552	1.38833	-0.000376
	1.39	-0.0001201	1.39	2.21e-05	1.39	-0.0001727	1.39	-0.0003588
	1.39167	-0.0001193	1.39167	2.51e-05	1.39167	-0.0002216	1.39167	-0.0003054
	1.39333	-0.000143	1.39333	2.8e-05	1.39333	-0.0003017	1.39333	-0.000221
	1.395	-0.0001585	1.395	2.44e-05	1.395	-0.0003696	1.395	-0.0001522
	1.39667	-0.0001766	1.39667	1.8e-05	1.39667	-0.0004029	1.39667	-9.84e-05
	1.39833	-0.0001776	1.39833	2.1e-06	1.39833	-0.0004993	1.39833	-2.62e-05
	1.4	-0.0001793	1.4	-5.4e-06	1.4	-0.0005526	1.4	-4.71e-05
	1.40167	-0.0001733	1.40167	-1.65e-05	1.40167	-0.0005015	1.40167	-0.0001251
	1.40333	-0.0001624	1.40333	-3.06e-05	1.40333	-0.0004167	1.40333	-0.0001583
	1.405	-0.0001461	1.405	-3.34e-05	1.405	-0.0003467	1.405	-0.0002339
	1.40667	-0.0001285	1.40667	-2.53e-05	1.40667	-0.0001745	1.40667	-0.0003257
	1.40833	-0.0001143	1.40833	-1.43e-05	1.40833	-1.38e-05	1.40833	-0.00033
	1.41	-9.5e-05	1.41	5.6e-06	1.41	5.6e-05	1.41	-0.0002805
	1.41167	-9.26e-05	1.41167	3.35e-05	1.41167	8.43e-05	1.41167	-0.0002519
	1.41333	-9.06e-05	1.41333	4.91e-05	1.41333	0.0001385	1.41333	-0.0001718
	1.415	-9.36e-05	1.415	5.1e-05	1.415	7.87e-05	1.415	-0.0001059
	1.41667	-9.89e-05	1.41667	5.34e-05	1.41667	9.9e-06	1.41667	-7.03e-05
	1.41833	-0.0001123	1.41833	4.22e-05	1.41833	3.3e-06	1.41833	-3.58e-05
	1.42	-0.0001144	1.42	3.13e-05	1.42	5.7e-06	1.42	-1.81e-05
	1.42167	-0.0001291	1.42167	3.17e-05	1.42167	2.6e-06	1.42167	-1.03e-05
	1.42333	-0.0001402	1.42333	4.24e-05	1.42333	5.51e-05	1.42333	-3.14e-05
	1.425	-0.0001383	1.425	3.7e-05	1.425	0.0001224	1.425	-7.31e-05
	1.42667	-0.0001263	1.42667	3.72e-05	1.42667	0.0001512	1.42667	-0.0001641
	1.42833	-0.0001259	1.42833	4.02e-05	1.42833	0.0001556	1.42833	-0.0002743
	1.43	-0.0001107	1.43	3.13e-05	1.43	0.0001103	1.43	-0.0004058
	1.43167	-0.0001006	1.43167	2.25e-05	1.43167	7.58e-05	1.43167	-0.0004518
	1.43333	-0.0001062	1.43333	2.65e-05	1.43333	2.4e-05	1.43333	-0.0004475
	1.435	-0.0001235	1.435	3.59e-05	1.435	-2.75e-05	1.435	-0.0004058
	1.43667	-0.0001356	1.43667	2.84e-05	1.43667	-5.1e-05	1.43667	-0.000351
	1.43833	-0.0001657	1.43833	3.27e-05	1.43833	1.18e-05	1.43833	-0.0002401
	1.44	-0.0001927	1.44	3.13e-05	1.44	4.82e-05	1.44	-0.0001706
	1.44167	-0.0002025	1.44167	2.02e-05	1.44167	7.53e-05	1.44167	-9.92e-05
	1.44333	-0.0002106	1.44333	1.02e-05	1.44333	7.84e-05	1.44333	-7.54e-05
	1.445	-0.000216	1.445	2.09e-05	1.445	7.02e-05	1.445	-4.75e-05
	1.44667	-0.0001987	1.44667	1.56e-05	1.44667	2.95e-05	1.44667	-9.36e-05
	1.44833	-0.0001835	1.44833	1.69e-05	1.44833	-4.73e-05	1.44833	-0.0001427
	1.45	-0.0001809	1.45	3.12e-05	1.45	-0.0001136	1.45	-0.0002759
	1.45167	-0.0001666	1.45167	2.65e-05	1.45167	-0.0001221	1.45167	-0.0003193
	1.45333	-0.0001528	1.45333	1.18e-05	1.45333	-0.0001478	1.45333	-0.0003242
	1.455	-0.0001517	1.455	1.17e-05	1.455	-0.0002209	1.455	-0.0002856
	1.45667	-0.0001544	1.45667	1.05e-05	1.45667	-0.0002499	1.45667	-0.0002554
	1.45833	-0.0001446	1.45833	-8e-07	1.45833	-0.0002426	1.45833	-0.0001339
	1.46	-0.0001433	1.46	4.6e-06	1.46	-0.0002514	1.46	-7.47e-05
	1.46167	-0.0001372	1.46167	6e-06	1.46167	-0.0002387	1.46167	-4.22e-05
	1.46333	-0.0001298	1.46333	6.2e-06	1.46333	-0.0001757	1.46333	6e-07
	1.465	-0.0001075	1.465	6e-06	1.465	-0.0001021	1.465	0.0001042
	1.46667	-0.0001013	1.46667	9.8e-06	1.46667	-8.57e-05	1.46667	0.000116
	1.46833	-9.1e-05	1.46833	1.03e-05	1.46833	-9.24e-05	1.46833	0.0001487
	1.47	-8.78e-05	1.47	2.12e-05	1.47	-7.86e-05	1.47	0.0002079
	1.47167	-8.35e-05	1.47167	2.69e-05	1.47167	-0.0001036	1.47167	0.0002578
	1.47333	-0.0001028	1.47333	2.98e-05	1.47333	-0.0001471	1.47333	0.0002216
	1.475	-0.000121	1.475	2.92e-05	1.475	-0.0001695	1.475	0.0002563
	1.47667	-0.000141	1.47667	3.65e-05	1.47667	-0.0001869	1.47667	0.0002667
	1.47833	-0.0001616	1.47833	3.73e-05	1.47833	-0.0002327	1.47833	0.0001824
	1.48	-0.000184	1.48	4e-05	1.48	-0.0002186	1.48	6.2e-05
	1.48167	-0.0001895	1.48167	4.34e-05	1.48167	-0.0001999	1.48167	-4.79e-05
	1.48333	-0.0001856	1.48333	4.64e-05	1.48333	-0.0001773	1.48333	-0.0001447
	1.485	-0.0001854	1.485	3.58e-05	1.485	-0.0001653	1.485	-0.0002327
	1.48667	-0.0001847	1.48667	2.58e-05	1.48667	-0.0001543	1.48667	-0.0001944
	1.48833	-0.0001828	1.48833	1.45e-05	1.48833	-0.0002046	1.48833	-0.0001678
	1.49	-0.0001806	1.49	7.2e-06	1.49	-0.0002971	1.49	-0.0001231
	1.49167	-0.0001865	1.49167	2.8e-06	1.49167	-0.0003762	1.49167	-0.000108
	1.49333	-0.0001833	1.49333	9.5e-06	1.49333	-0.0004158	1.49333	-6.96e-05
	1.495	-0.0001721	1.495	1.32e-05	1.495	-0.0004354	1.495	-0.0001129
	1.49667	-0.0001592	1.49667	8.9e-06	1.49667	-0.0004562	1.49667	-6.49e-05
	1.49833	-0.0001615	1.49833	5.6e-06	1.49833	-0.0004133	1.49833	1.78e-05
	1.5	-0.0001532	1.5	1.9e-06	1.5	-0.000416	1.5	6.33e-05
	1.50167	-0.000156	1.50167	-7.6e-06	1.50167	-0.000441	1.50167	6.63e-05
	1.50333	-0.0001641	1.50333	-1.1e-05	1.50333	-0.0004702	1.50333	7.92e-05
	1.505	-0.0001742	1.505	-4.1e-06	1.505	-0.0004822	1.505	3.92e-05
	1.50667	-0.0001722	1.50667	9e-07	1.50667	-0.0005128	1.50667	-4.97e-05
	1.50833	-0.0001751	1.50833	1.34e-05	1.50833	-0.0004551	1.50833	-7.35e-05
	1.51	-0.0001769	1.51	2.98e-05	1.51	-0.0004111	1.51	-9.82e-05
	1.51167	-0.0001799	1.51167	4.77e-05	1.51167	-0.0003787	1.51167	-8.31e-05
	1.51333	-0.0001847	1.51333	5.94e-05	1.51333	-0.0003269	1.51333	-7.77e-05
	1.515	-0.0001852	1.515	6.59e-05	1.515	-0.0002817	1.515	-4.5e-05
	1.51667	-0.0001866	1.51667	6.18e-05	1.51667	-0.0003448	1.51667	-9.76e-05
	1.51833	-0.0001781	1.51833	5.21e-05	1.51833	-0.0003853	1.51833	-7.56e-05
	1.52	-0.0001735	1.52	3.3e-05	1.52	-0.0004177	1.52	-0.0001111
	1.52167	-0.0001611	1.52167	2.5e-05	1.52167	-0.0004847	1.52167	-0.0001521
	1.52333	-0.0001589	1.52333	1.44e-05	1.52333	-0.0005425	1.52333	-0.0002177
	1.525	-0.0001486	1.525	7.4e-06	1.525	-0.0005248	1.525	-0.0001836
	1.52667	-0.0001444	1.52667	-6e-06	1.52667	-0.0004886	1.52667	-0.0002481
	1.52833	-0.0001395	1.52833	-4.6e-06	1.52833	-0.000466	1.52833	-0.0002947
	1.53	-0.0001407	1.53	-1.17e-05	1.53	-0.0003933	1.53	-0.0003288
	1.53167	-0.00013	1.53167	-4.3e-06	1.53167	-0.0003149	1.53167	-0.0003484
	1.53333	-0.0001311	1.53333	3e-07	1.53333	-0.0002253	1.53333	-0.0003973
	1.535	-0.0001363	1.535	2.52e-05	1.535	-0.0001816	1.535	-0.0003427
	1.53667	-0.0001438	1.53667	3.11e-05	1.53667	-0.0001354	1.53667	-0.0002473
	1.53833	-0.0001512	1.53833	4.69e-05	1.53833	-0.0001453	1.53833	-0.0001545
	1.54	-0.0001658	1.54	5.38e-05	1.54	-0.0001786	1.54	-6.07e-05
	1.54167	-0.0001735	1.54167	6.44e-05	1.54167	-0.0002604	1.54167	-3.94e-05
	1.54333	-0.0001813	1.54333	5.97e-05	1.54333	-0.0003021	1.54333	-7.74e-05
	1.545	-0.0001788	1.545	6.28e-05	1.545	-0.000325	1.545	-0.000141
	1.54667	-0.0001824	1.54667	5.53e-05	1.54667	-0.0002856	1.54667	-0.0001848
	1.54833	-0.0001862	1.54833	5.16e-05	1.54833	-0.0001999	1.54833	-0.0002105
	1.55	-0.0001982	1.55	4.89e-05	1.55	-0.0001028	1.55	-0.000129
	1.55167	-0.0002028	1.55167	4.97e-05	1.55167	-3.48e-05	1.55167	-6e-06
	1.55333	-0.0002112	1.55333	5.2e-05	1.55333	2.83e-05	1.55333	0.0001002
	1.555	-0.0002088	1.555	5.21e-05	1.555	7.3e-05	1.555	0.0001856
	1.55667	-0.0001991	1.55667	4.22e-05	1.55667	3.58e-05	1.55667	0.0002818
	1.55833	-0.0001811	1.55833	2.59e-05	1.55833	-4e-05	1.55833	0.0003402
	1.56	-0.0001573	1.56	4.5e-06	1.56	-9.99e-05	1.56	0.0003113
	1.56167	-0.000146	1.56167	-1.16e-05	1.56167	-0.0001564	1.56167	0.0002949
	1.56333	-0.00014	1.56333	-2.89e-05	1.56333	-0.000223	1.56333	0.0002764
	1.565	-0.0001433	1.565	-4.06e-05	1.565	-0.0002309	1.565	0.0001884
	1.56667	-0.0001546	1.56667	-4.9e-05	1.56667	-0.0001893	1.56667	7.89e-05
	1.56833	-0.0001865	1.56833	-4.47e-05	1.56833	-0.000135	1.56833	3.26e-05
	1.57	-0.0001976	1.57	-4.73e-05	1.57	-9.92e-05	1.57	-3.15e-05
	1.57167	-0.0002102	1.57167	-3.77e-05	1.57167	-6.53e-05	1.57167	-7.94e-05
	1.57333	-0.0002273	1.57333	-2.17e-05	1.57333	-6.4e-05	1.57333	-5.16e-05
	1.575	-0.0002391	1.575	-1.34e-05	1.575	-7.18e-05	1.575	-2.4e-05
	1.57667	-0.0002382	1.57667	-1.08e-05	1.57667	-0.0001083	1.57667	-4.1e-05
	1.57833	-0.0002423	1.57833	-5.7e-06	1.57833	-0.0001162	1.57833	-3.42e-05
	1.58	-0.0002429	1.58	-9e-07	1.58	-0.0001449	1.58	-6.61e-05
	1.58167	-0.0002415	1.58167	1.5e-06	1.58167	-0.0001274	1.58167	-0.0001766
	1.58333	-0.000238	1.58333	2.13e-05	1.58333	-4.64e-05	1.58333	-0.0002759
	1.585	-0.0002352	1.585	3.92e-05	1.585	2.31e-05	1.585	-0.0002968
	1.58667	-0.0002413	1.58667	5.63e-05	1.58667	8.26e-05	1.58667	-0.0002946
	1.58833	-0.0002406	1.58833	6.48e-05	1.58833	0.0001694	1.58833	-0.0002505
	1.59	-0.0002292	1.59	6.47e-05	1.59	0.0002411	1.59	-0.0001317
	1.59167	-0.0002186	1.59167	5.98e-05	1.59167	0.0001776	1.59167	-2.5e-06
	1.59333	-0.0002076	1.59333	5.51e-05	1.59333	0.0001552	1.59333	5.46e-05
	1.595	-0.0001889	1.595	5.22e-05	1.595	0.0001005	1.595	4.52e-05
	1.59667	-0.0001823	1.59667	5.52e-05	1.59667	1.19e-05	1.59667	2.98e-05
	1.59833	-0.0001791	1.59833	6.89e-05	1.59833	-6.81e-05	1.59833	-2.26e-05
	1.6	-0.0001815	1.6	6.48e-05	1.6	-5.66e-05	1.6	-0.0001141
	1.60167	-0.0001807	1.60167	5.59e-05	1.60167	-0.0001005	1.60167	-0.0001892
	1.60333	-0.0001856	1.60333	4.9e-05	1.60333	-0.0001236	1.60333	-0.0002015
	1.605	-0.000188	1.605	3.53e-05	1.605	-0.0001222	1.605	-0.0002426
	1.60667	-0.0001991	1.60667	2.12e-05	1.60667	-0.0001434	1.60667	-0.0002341
	1.60833	-0.0001984	1.60833	2.38e-05	1.60833	-0.0001561	1.60833	-0.0001704
	1.61	-0.0002052	1.61	3.85e-05	1.61	-0.000114	1.61	-8.77e-05
	1.61167	-0.0002047	1.61167	4.57e-05	1.61167	-8.57e-05	1.61167	-1.27e-05
	1.61333	-0.0002073	1.61333	5.85e-05	1.61333	-2.48e-05	1.61333	0.0001164
	1.615	-0.000202	1.615	5.84e-05	1.615	-8.8e-06	1.615	0.0001599
	1.61667	-0.0002055	1.61667	5.88e-05	1.61667	-4.99e-05	1.61667	0.0001889
	1.61833	-0.0002073	1.61833	5.15e-05	1.61833	-9.53e-05	1.61833	0.0001894
	1.62	-0.0002158	1.62	4.63e-05	1.62	-0.0001063	1.62	0.0001627
	1.62167	-0.0002105	1.62167	3.54e-05	1.62167	-0.0001772	1.62167	8.7e-05
	1.62333	-0.0002067	1.62333	3.66e-05	1.62333	-0.0001978	1.62333	6.63e-05
	1.625	-0.0002059	1.625	3.52e-05	1.625	-0.000171	1.625	6.5e-06
	1.62667	-0.0002043	1.62667	2.97e-05	1.62667	-0.0001597	1.62667	-1.93e-05
	1.62833	-0.0002	1.62833	2.66e-05	1.62833	-0.0001894	1.62833	-2.68e-05
	1.63	-0.0002035	1.63	2.9e-05	1.63	-0.0001849	1.63	-1.42e-05
	1.63167	-0.0002093	1.63167	1.91e-05	1.63167	-0.0001695	1.63167	-5.39e-05
	1.63333	-0.0002069	1.63333	1e-05	1.63333	-0.0001881	1.63333	-4.39e-05
	1.635	-0.000205	1.635	7.5e-06	1.635	-0.0002238	1.635	-3.46e-05
	1.63667	-0.0002023	1.63667	-3.8e-06	1.63667	-0.0002256	1.63667	-4.85e-05
	1.63833	-0.0002	1.63833	-1.67e-05	1.63833	-0.0002457	1.63833	-0.0001004
	1.64	-0.0002	1.64	-1.37e-05	1.64	-0.0002666	1.64	-7.05e-05
	1.64167	-0.0002152	1.64167	-2.01e-05	1.64167	-0.0002644	1.64167	-7.79e-05
	1.64333	-0.0002195	1.64333	-2.33e-05	1.64333	-0.0002055	1.64333	-7.48e-05
	1.645	-0.0002231	1.645	-1.41e-05	1.645	-0.0001882	1.645	-6.47e-05
	1.64667	-0.0002293	1.64667	-5.6e-06	1.64667	-0.000134	1.64667	3.16e-05
	1.64833	-0.0002258	1.64833	-3.1e-06	1.64833	-9.08e-05	1.64833	8.36e-05
	1.65	-0.0002056	1.65	1.2e-05	1.65	-5.81e-05	1.65	0.0001326
	1.65167	-0.0001971	1.65167	2.46e-05	1.65167	-0.0001169	1.65167	0.0001489
	1.65333	-0.0002007	1.65333	3.42e-05	1.65333	-0.0001065	1.65333	0.0001535
	1.655	-0.0001997	1.655	4.52e-05	1.655	-0.0001125	1.655	9.42e-05
	1.65667	-0.00021	1.65667	5.82e-05	1.65667	-0.0001244	1.65667	4.62e-05
	1.65833	-0.0002217	1.65833	6.75e-05	1.65833	-0.000131	1.65833	1.5e-05
	1.66	-0.0002379	1.66	7.2e-05	1.66	-5.84e-05	1.66	-5.62e-05
	1.66167	-0.0002374	1.66167	8.07e-05	1.66167	-5.92e-05	1.66167	-9.44e-05
	1.66333	-0.0002385	1.66333	8.5e-05	1.66333	-0.0001121	1.66333	-0.0001413
	1.665	-0.0002254	1.665	8.42e-05	1.665	-0.0001582	1.665	-0.0001897
	1.66667	-0.0002213	1.66667	7.86e-05	1.66667	-0.000199	1.66667	-0.0002237
	1.66833	-0.0002048	1.66833	6.74e-05	1.66833	-0.000257	1.66833	-0.0001785
	1.67	-0.0001975	1.67	4.74e-05	1.67	-0.0002469	1.67	-0.0001035
	1.67167	-0.0001964	1.67167	3.3e-05	1.67167	-0.0001691	1.67167	3.4e-06
	1.67333	-0.0002062	1.67333	2.08e-05	1.67333	-9.43e-05	1.67333	0.0001116
	1.675	-0.0002158	1.675	1.83e-05	1.675	-2.99e-05	1.675	0.0001956
	1.67667	-0.0002294	1.67667	3.42e-05	1.67667	-1e-05	1.67667	0.0002463
	1.67833	-0.0002433	1.67833	5.1e-05	1.67833	-2.72e-05	1.67833	0.0002474
	1.68	-0.000254	1.68	7.18e-05	1.68	-8.66e-05	1.68	0.000253
	1.68167	-0.0002546	1.68167	9.19e-05	1.68167	-0.0001453	1.68167	0.0002536
	1.68333	-0.0002467	1.68333	9.4e-05	1.68333	-0.0001889	1.68333	0.0003011
	1.685	-0.0002488	1.685	8.64e-05	1.685	-0.0001766	1.685	0.0003331
	1.68667	-0.0002464	1.68667	7.98e-05	1.68667	-0.000146	1.68667	0.0003477
	1.68833	-0.0002374	1.68833	6.63e-05	1.68833	-8.11e-05	1.68833	0.0003332
	1.69	-0.0002449	1.69	4.94e-05	1.69	-2.68e-05	1.69	0.0003427
	1.69167	-0.0002513	1.69167	5.01e-05	1.69167	3.53e-05	1.69167	0.0002898
	1.69333	-0.0002427	1.69333	4.28e-05	1.69333	9.32e-05	1.69333	0.0002404
	1.695	-0.0002402	1.695	3.7e-05	1.695	0.0001186	1.695	0.0002437
	1.69667	-0.0002458	1.69667	2.91e-05	1.69667	0.0001192	1.69667	0.0002713
	1.69833	-0.0002472	1.69833	2.79e-05	1.69833	0.0001436	1.69833	0.0002289
	1.7	-0.0002551	1.7	2e-05	1.7	0.0001254	1.7	0.0002354
	1.70167	-0.0002698	1.70167	2.57e-05	1.70167	6.07e-05	1.70167	0.0002918
	1.70333	-0.0002719	1.70333	3.2e-05	1.70333	6.09e-05	1.70333	0.0003069
	1.705	-0.0002666	1.705	4.72e-05	1.705	9.83e-05	1.705	0.0003109
	1.70667	-0.0002483	1.70667	5.56e-05	1.70667	0.0001122	1.70667	0.0003638
	1.70833	-0.000231	1.70833	6.6e-05	1.70833	0.0001524	1.70833	0.0003578
	1.71	-0.000214	1.71	6.88e-05	1.71	0.0002403	1.71	0.0002942
	1.71167	-0.0002103	1.71167	7.39e-05	1.71167	0.0002466	1.71167	0.0001971
	1.71333	-0.0002092	1.71333	6.76e-05	1.71333	0.0001619	1.71333	9.99e-05
	1.715	-0.0002188	1.715	6.85e-05	1.715	0.000152	1.715	-1.23e-05
	1.71667	-0.0002236	1.71667	6.44e-05	1.71667	0.0001307	1.71667	-6.88e-05
	1.71833	-0.0002278	1.71833	6.24e-05	1.71833	8.9e-05	1.71833	-0.0001131
	1.72	-0.0002301	1.72	4.58e-05	1.72	6.79e-05	1.72	-4.91e-05
	1.72167	-0.0002331	1.72167	3.8e-05	1.72167	0.0001338	1.72167	1.16e-05
	1.72333	-0.0002355	1.72333	2.45e-05	1.72333	0.0001002	1.72333	7.92e-05
	1.725	-0.0002414	1.725	1.45e-05	1.725	8.44e-05	1.725	0.0001278
	1.72667	-0.000247	1.72667	-2e-07	1.72667	6.86e-05	1.72667	0.0002245
	1.72833	-0.000246	1.72833	4.4e-06	1.72833	3.17e-05	1.72833	0.0002173
	1.73	-0.0002443	1.73	2.7e-06	1.73	1.14e-05	1.73	0.0001959
	1.73167	-0.0002393	1.73167	5e-06	1.73167	2.72e-05	1.73167	0.0001796
	1.73333	-0.0002272	1.73333	1.57e-05	1.73333	4.38e-05	1.73333	0.0001555
	1.735	-0.0002127	1.735	3.6e-05	1.735	5.35e-05	1.735	5.17e-05
	1.73667	-0.0001979	1.73667	5e-05	1.73667	0.0001505	1.73667	3.25e-05
	1.73833	-0.0001886	1.73833	6.69e-05	1.73833	0.0001664	1.73833	6.39e-05
	1.74	-0.0001808	1.74	8.61e-05	1.74	0.0001707	1.74	0.0001281
	1.74167	-0.0001821	1.74167	8.74e-05	1.74167	0.0001686	1.74167	0.0002006
	1.74333	-0.0001883	1.74333	8.29e-05	1.74333	0.0001902	1.74333	0.0003312
	1.745	-0.0002021	1.745	7.09e-05	1.745	0.000146	1.745	0.0003879
	1.74667	-0.0002079	1.74667	6.62e-05	1.74667	0.0001602	1.74667	0.0003713
	1.74833	-0.0002137	1.74833	5.73e-05	1.74833	0.0001919	1.74833	0.0002856
	1.75	-0.0002092	1.75	5.93e-05	1.75	0.000221	1.75	0.0001918
	1.75167	-0.0001999	1.75167	6.09e-05	1.75167	0.0002517	1.75167	0.0001063
	1.75333	-0.0001895	1.75333	7.08e-05	1.75333	0.0003281	1.75333	1.7e-05
	1.755	-0.0001793	1.755	6.93e-05	1.755	0.000382	1.755	8.5e-06
	1.75667	-0.0001631	1.75667	6.64e-05	1.75667	0.000418	1.75667	-3.2e-06
	1.75833	-0.0001569	1.75833	6.41e-05	1.75833	0.0004738	1.75833	2.63e-05
	1.76	-0.0001608	1.76	6.58e-05	1.76	0.0005209	1.76	4e-05
	1.76167	-0.0001653	1.76167	5.92e-05	1.76167	0.0005188	1.76167	0.0001346
	1.76333	-0.0001711	1.76333	6.08e-05	1.76333	0.00051	1.76333	0.0001638
	1.765	-0.0001911	1.765	5.55e-05	1.765	0.0005343	1.765	0.0002602
	1.76667	-0.0002088	1.76667	5.06e-05	1.76667	0.0005263	1.76667	0.0002997
	1.76833	-0.0002151	1.76833	4.2e-05	1.76833	0.0005247	1.76833	0.0002943
	1.77	-0.0002135	1.77	4.1e-05	1.77	0.000534	1.77	0.0002472
	1.77167	-0.0002144	1.77167	3.79e-05	1.77167	0.0005813	1.77167	0.0002398
	1.77333	-0.0002079	1.77333	4.92e-05	1.77333	0.0005933	1.77333	0.000207
	1.775	-0.0002004	1.775	6.19e-05	1.775	0.0005819	1.775	0.0001603
	1.77667	-0.0001996	1.77667	7.03e-05	1.77667	0.0005366	1.77667	0.0001457
	1.77833	-0.0002117	1.77833	8.01e-05	1.77833	0.0004758	1.77833	6.86e-05
	1.78	-0.0002184	1.78	9.21e-05	1.78	0.0003662	1.78	-2.57e-05
	1.78167	-0.0002254	1.78167	0.0001008	1.78167	0.0002289	1.78167	-0.0001185
	1.78333	-0.0002294	1.78333	9.98e-05	1.78333	0.0001565	1.78333	-0.0001404
	1.785	-0.0002239	1.785	0.0001088	1.785	9.67e-05	1.785	-0.0001401
	1.78667	-0.0002021	1.78667	0.0001085	1.78667	4.7e-05	1.78667	-5.63e-05
	1.78833	-0.0001884	1.78833	9.78e-05	1.78833	-3.6e-06	1.78833	1.42e-05
	1.79	-0.0001761	1.79	7.81e-05	1.79	-1.3e-06	1.79	8.96e-05
	1.79167	-0.0001688	1.79167	6.66e-05	1.79167	-5.21e-05	1.79167	0.0001298
	1.79333	-0.0001752	1.79333	5.65e-05	1.79333	-0.0001192	1.79333	0.0001458
	1.795	-0.0001902	1.795	5.42e-05	1.795	-0.0001674	1.795	0.0001511
	1.79667	-0.0002063	1.79667	6.23e-05	1.79667	-0.0001535	1.79667	0.0001745
	1.79833	-0.0002209	1.79833	7.77e-05	1.79833	-9.95e-05	1.79833	0.0001599
	1.8	-0.00023	1.8	8.96e-05	1.8	-5.65e-05	1.8	0.0001333
	1.80167	-0.0002316	1.80167	8.43e-05	1.80167	9.1e-06	1.80167	9.72e-05
	1.80333	-0.0002315	1.80333	8.55e-05	1.80333	6.7e-05	1.80333	5.8e-05
	1.805	-0.0002221	1.805	7.61e-05	1.805	6.72e-05	1.805	3.8e-06
	1.80667	-0.0002083	1.80667	7.69e-05	1.80667	-8.2e-06	1.80667	-2.22e-05
	1.80833	-0.0002028	1.80833	7.8e-05	1.80833	-1.11e-05	1.80833	-3.18e-05
	1.81	-0.0001944	1.81	9.67e-05	1.81	-1.6e-06	1.81	1.9e-06
	1.81167	-0.0001934	1.81167	9.55e-05	1.81167	6.5e-06	1.81167	2.1e-05
	1.81333	-0.0002009	1.81333	0.0001115	1.81333	4.32e-05	1.81333	6.66e-05
	1.815	-0.0002096	1.815	0.000104	1.815	0.0001105	1.815	0.0001255
	1.81667	-0.0002095	1.81667	9.46e-05	1.81667	0.0001221	1.81667	0.0001222
	1.81833	-0.0002124	1.81833	7.45e-05	1.81833	0.0001264	1.81833	3.16e-05
	1.82	-0.0002128	1.82	7.36e-05	1.82	0.0001466	1.82	-0.0001036
	1.82167	-0.0002038	1.82167	6.53e-05	1.82167	0.0001475	1.82167	-0.0002305
	1.82333	-0.0002043	1.82333	7.69e-05	1.82333	0.0001185	1.82333	-0.0003723
	1.825	-0.000211	1.825	9.47e-05	1.825	0.0001448	1.825	-0.0004236
	1.82667	-0.0002139	1.82667	0.0001209	1.82667	0.000171	1.82667	-0.0004172
	1.82833	-0.0002076	1.82833	0.0001301	1.82833	0.0001921	1.82833	-0.0003438
	1.83	-0.0002037	1.83	0.0001328	1.83	0.0002172	1.83	-0.0003201
	1.83167	-0.0001898	1.83167	0.0001242	1.83167	0.0002346	1.83167	-0.0003028
	1.83333	-0.0001692	1.83333	0.0001095	1.83333	0.0001942	1.83333	-0.0002821
	1.835	-0.0001565	1.835	9.21e-05	1.835	0.0001832	1.835	-0.0002535
	1.83667	-0.0001498	1.83667	8.38e-05	1.83667	0.0001625	1.83667	-0.0002
	1.83833	-0.0001451	1.83833	8.48e-05	1.83833	0.0001304	1.83833	-8.81e-05
	1.84	-0.0001446	1.84	8.59e-05	1.84	0.0001753	1.84	4.88e-05
	1.84167	-0.0001505	1.84167	9.03e-05	1.84167	0.000222	1.84167	0.0001326
	1.84333	-0.0001542	1.84333	9.45e-05	1.84333	0.000187	1.84333	0.0002028
	1.845	-0.0001522	1.845	9.8e-05	1.845	0.0001122	1.845	0.0002006
	1.84667	-0.0001595	1.84667	9.44e-05	1.84667	6.28e-05	1.84667	0.0001431
	1.84833	-0.0001588	1.84833	8.74e-05	1.84833	-3.67e-05	1.84833	4.75e-05
	1.85	-0.000159	1.85	7.68e-05	1.85	-9.25e-05	1.85	-2.32e-05
	1.85167	-0.0001569	1.85167	5.83e-05	1.85167	-8.84e-05	1.85167	-4.71e-05
	1.85333	-0.0001691	1.85333	4.25e-05	1.85333	-3.09e-05	1.85333	-4.7e-06
	1.855	-0.0001709	1.855	2.8e-05	1.855	1.27e-05	1.855	7.38e-05
	1.85667	-0.0001844	1.85667	2.7e-05	1.85667	7.63e-05	1.85667	0.000197
	1.85833	-0.0002024	1.85833	3.52e-05	1.85833	0.0001049	1.85833	0.0002825
	1.86	-0.0002238	1.86	5.49e-05	1.86	0.0001445	1.86	0.0002854
	1.86167	-0.0002329	1.86167	7.17e-05	1.86167	0.0001972	1.86167	0.0002365
	1.86333	-0.0002504	1.86333	9.19e-05	1.86333	0.0002472	1.86333	0.0001761
	1.865	-0.0002591	1.865	0.0001076	1.865	0.0002771	1.865	6.26e-05
	1.86667	-0.0002556	1.86667	0.0001095	1.86667	0.0003183	1.86667	4.8e-06
	1.86833	-0.000245	1.86833	0.0001041	1.86833	0.0002798	1.86833	3.36e-05
	1.87	-0.0002471	1.87	9.94e-05	1.87	0.000164	1.87	4.19e-05
	1.87167	-0.0002337	1.87167	9.22e-05	1.87167	5.52e-05	1.87167	4.89e-05
	1.87333	-0.0002307	1.87333	8.17e-05	1.87333	-6.43e-05	1.87333	0.000111
	1.875	-0.0002272	1.875	8.37e-05	1.875	-0.0001801	1.875	0.0001504
	1.87667	-0.0002262	1.87667	9.28e-05	1.87667	-0.0002076	1.87667	0.0001386
	1.87833	-0.0002116	1.87833	0.0001005	1.87833	-0.0001608	1.87833	0.0001653
	1.88	-0.0002032	1.88	0.0001073	1.88	-8.26e-05	1.88	0.0002149
	1.88167	-0.0001797	1.88167	0.0001145	1.88167	-9.7e-06	1.88167	0.0002281
	1.88333	-0.0001681	1.88333	0.0001181	1.88333	5.64e-05	1.88333	0.0002168
	1.885	-0.0001567	1.885	0.0001111	1.885	7.88e-05	1.885	0.0002022
	1.88667	-0.0001556	1.88667	0.0001081	1.88667	8.65e-05	1.88667	0.0002145
	1.88833	-0.0001625	1.88833	0.0001058	1.88833	3.23e-05	1.88833	0.0002168
	1.89	-0.0001806	1.89	0.0001055	1.89	1.97e-05	1.89	0.000221
	1.89167	-0.0001903	1.89167	9.36e-05	1.89167	-7.2e-06	1.89167	0.0002879
	1.89333	-0.0002015	1.89333	8.74e-05	1.89333	-7.4e-06	1.89333	0.0004124
	1.895	-0.0002044	1.895	6.99e-05	1.895	-3.75e-05	1.895	0.0004892
	1.89667	-0.0001934	1.89667	5.77e-05	1.89667	-8.8e-06	1.89667	0.0005283
	1.89833	-0.0001805	1.89833	3.47e-05	1.89833	4e-06	1.89833	0.0005385
	1.9	-0.000167	1.9	2.69e-05	1.9	4.94e-05	1.9	0.0005054
	1.90167	-0.0001582	1.90167	2.36e-05	1.90167	9.31e-05	1.90167	0.000392
	1.90333	-0.0001475	1.90333	3.46e-05	1.90333	0.0001483	1.90333	0.0002994
	1.905	-0.0001468	1.905	3.23e-05	1.905	0.0001506	1.905	0.0002191
	1.90667	-0.0001447	1.90667	4.82e-05	1.90667	0.0001491	1.90667	0.0002091
	1.90833	-0.0001512	1.90833	5.68e-05	1.90833	0.0001356	1.90833	0.0001612
	1.91	-0.0001537	1.91	5.8e-05	1.91	0.000117	1.91	0.0001532
	1.91167	-0.0001617	1.91167	4.91e-05	1.91167	0.0001229	1.91167	0.0001193
	1.91333	-0.000176	1.91333	5.39e-05	1.91333	0.0001273	1.91333	9.18e-05
	1.915	-0.0001922	1.915	4.55e-05	1.915	0.0001196	1.915	5.14e-05
	1.91667	-0.0002045	1.91667	4.37e-05	1.91667	8.14e-05	1.91667	7.64e-05
	1.91833	-0.0002158	1.91833	4.46e-05	1.91833	-3.3e-06	1.91833	6.44e-05
	1.92	-0.0002276	1.92	4.98e-05	1.92	-0.0001372	1.92	0.0001114
	1.92167	-0.0002303	1.92167	5.04e-05	1.92167	-0.0002144	1.92167	0.0001875
	1.92333	-0.0002308	1.92333	5.97e-05	1.92333	-0.0002597	1.92333	0.0002464
	1.925	-0.0002233	1.925	6.33e-05	1.925	-0.0002632	1.925	0.0002854
	1.92667	-0.0002124	1.92667	6.42e-05	1.92667	-0.0002155	1.92667	0.0003903
	1.92833	-0.0001948	1.92833	6.59e-05	1.92833	-7.53e-05	1.92833	0.0004625
	1.93	-0.0001836	1.93	7.03e-05	1.93	2.68e-05	1.93	0.0005193
	1.93167	-0.000174	1.93167	6.62e-05	1.93167	7.23e-05	1.93167	0.0005529
	1.93333	-0.0001692	1.93333	6.65e-05	1.93333	8.56e-05	1.93333	0.0005654
	1.935	-0.0001722	1.935	7.79e-05	1.935	9.9e-05	1.935	0.0005095
	1.93667	-0.0001886	1.93667	9.04e-05	1.93667	3.42e-05	1.93667	0.0004041
	1.93833	-0.000188	1.93833	0.0001037	1.93833	-3.36e-05	1.93833	0.0002772
	1.94	-0.0001852	1.94	0.0001215	1.94	-5.7e-05	1.94	0.0001817
	1.94167	-0.0001864	1.94167	0.0001334	1.94167	-5.03e-05	1.94167	9.7e-05
	1.94333	-0.0001794	1.94333	0.0001392	1.94333	-6.89e-05	1.94333	6.4e-05
	1.945	-0.0001581	1.945	0.0001382	1.945	-8.28e-05	1.945	7.65e-05
	1.94667	-0.0001591	1.94667	0.0001312	1.94667	-6.17e-05	1.94667	0.0001404
	1.94833	-0.0001561	1.94833	0.0001209	1.94833	-3.85e-05	1.94833	0.0001579
	1.95	-0.0001568	1.95	0.000107	1.95	-3.75e-05	1.95	0.0002121
	1.95167	-0.0001626	1.95167	9.27e-05	1.95167	-2.33e-05	1.95167	0.0002575
	1.95333	-0.000175	1.95333	8.36e-05	1.95333	1.9e-05	1.95333	0.0003574
	1.955	-0.0001745	1.955	7.21e-05	1.955	-1.4e-06	1.955	0.0003901
	1.95667	-0.0001793	1.95667	6.97e-05	1.95667	-5.29e-05	1.95667	0.0004875
	1.95833	-0.000174	1.95833	7.82e-05	1.95833	-9.95e-05	1.95833	0.0005242
	1.96	-0.0001637	1.96	9.02e-05	1.96	-0.0001452	1.96	0.0005277
	1.96167	-0.0001496	1.96167	0.0001055	1.96167	-0.0002245	1.96167	0.0004165
	1.96333	-0.0001363	1.96333	0.0001225	1.96333	-0.0002396	1.96333	0.0003371
	1.965	-0.0001289	1.965	0.0001397	1.965	-0.0002242	1.965	0.0001978
	1.96667	-0.0001224	1.96667	0.0001527	1.96667	-0.0002407	1.96667	0.0001061
	1.96833	-0.0001242	1.96833	0.0001589	1.96833	-0.0002569	1.96833	8.68e-05
	1.97	-0.000139	1.97	0.0001535	1.97	-0.0002388	1.97	0.0001404
	1.97167	-0.0001577	1.97167	0.0001545	1.97167	-0.0002491	1.97167	0.0002188
	1.97333	-0.0001651	1.97333	0.0001388	1.97333	-0.0002949	1.97333	0.0003209
	1.975	-0.0001748	1.975	0.0001166	1.975	-0.000274	1.975	0.0003802
	1.97667	-0.0001666	1.97667	9.11e-05	1.97667	-0.0002485	1.97667	0.0003914
	1.97833	-0.0001526	1.97833	7.63e-05	1.97833	-0.000227	1.97833	0.0004015
	1.98	-0.0001376	1.98	5.36e-05	1.98	-0.0001879	1.98	0.0003929
	1.98167	-0.0001252	1.98167	3.96e-05	1.98167	-0.0001183	1.98167	0.0004122
	1.98333	-0.0001202	1.98333	2.64e-05	1.98333	-0.0001046	1.98333	0.0004975
	1.985	-0.0001353	1.985	2.36e-05	1.985	-0.0001074	1.985	0.0005683
	1.98667	-0.0001377	1.98667	1.57e-05	1.98667	-0.0001479	1.98667	0.0006382
	1.98833	-0.000143	1.98833	1.7e-05	1.98833	-0.0002346	1.98833	0.0006627
	1.99	-0.0001479	1.99	2.98e-05	1.99	-0.0003018	1.99	0.0006807
	1.99167	-0.0001318	1.99167	5.92e-05	1.99167	-0.0003146	1.99167	0.0006411
	1.99333	-0.0001146	1.99333	7.97e-05	1.99333	-0.0002952	1.99333	0.000634
	1.995	-0.0001142	1.995	0.0001023	1.995	-0.0002174	1.995	0.0006111
	1.99667	-0.0001032	1.99667	0.0001201	1.99667	-0.0001343	1.99667	0.000653
	1.99833	-0.0001022	1.99833	0.0001184	1.99833	-0.0001212	1.99833	0.0006663
	2	-0.0001256	2	0.0001085	2	-0.0001573	2	0.0006885
	2.00167	-0.0001444	2.00167	0.0001044	2.00167	-0.0002086	2.00167	0.0006228
	2.00333	-0.0001394	2.00333	9.49e-05	2.00333	-0.0003098	2.00333	0.0005526
	2.005	-0.0001412	2.005	8.13e-05	2.005	-0.0003396	2.005	0.0004183
	2.00667	-0.0001299	2.00667	7.96e-05	2.00667	-0.0002947	2.00667	0.0002902
	2.00833	-0.000111	2.00833	6.12e-05	2.00833	-0.0002561	2.00833	0.0001569
	2.01	-8.97e-05	2.01	3.7e-05	2.01	-0.0002415	2.01	0.0001383
	2.01167	-9.26e-05	2.01167	1.97e-05	2.01167	-0.000197	2.01167	0.0001333
	2.01333	-9.45e-05	2.01333	1.01e-05	2.01333	-0.0002213	2.01333	0.0001981
	2.015	-9.75e-05	2.015	-3e-07	2.015	-0.0002891	2.015	0.0002755
	2.01667	-9.64e-05	2.01667	9.7e-06	2.01667	-0.0002998	2.01667	0.000409
	2.01833	-9.6e-05	2.01833	2.96e-05	2.01833	-0.0002967	2.01833	0.0004599
	2.02	-8.5e-05	2.02	4.43e-05	2.02	-0.0003178	2.02	0.0004654
	2.02167	-8.23e-05	2.02167	5.79e-05	2.02167	-0.0002951	2.02167	0.000414
	2.02333	-8.48e-05	2.02333	7.15e-05	2.02333	-0.0002499	2.02333	0.0003218
	2.025	-9.37e-05	2.025	8.29e-05	2.025	-0.0002562	2.025	0.0001221
	2.02667	-0.0001026	2.02667	8.62e-05	2.02667	-0.0002471	2.02667	-2.16e-05
	2.02833	-0.0001178	2.02833	0.0001008	2.02833	-0.0002163	2.02833	-6.35e-05
	2.03	-0.0001196	2.03	0.000116	2.03	-0.0002315	2.03	-5.96e-05
	2.03167	-0.0001195	2.03167	0.0001313	2.03167	-0.0002627	2.03167	2.74e-05
	2.03333	-0.0001032	2.03333	0.0001417	2.03333	-0.0002497	2.03333	0.0001783
	2.035	-8.24e-05	2.035	0.0001567	2.035	-0.0002432	2.035	0.0003442
	2.03667	-6.19e-05	2.03667	0.0001631	2.03667	-0.0002453	2.03667	0.0004109
	2.03833	-5.01e-05	2.03833	0.0001633	2.03833	-0.0002056	2.03833	0.0004839
	2.04	-4.98e-05	2.04	0.000158	2.04	-0.0001643	2.04	0.0004898
	2.04167	-6.15e-05	2.04167	0.0001472	2.04167	-0.0001375	2.04167	0.0005068
	2.04333	-8.08e-05	2.04333	0.0001317	2.04333	-0.0001237	2.04333	0.000494
	2.045	-9.14e-05	2.045	0.0001128	2.045	-0.0001053	2.045	0.0005251
	2.04667	-9.87e-05	2.04667	9.72e-05	2.04667	-7.78e-05	2.04667	0.0005228
	2.04833	-9.23e-05	2.04833	7.97e-05	2.04833	-3.9e-06	2.04833	0.0005445
	2.05	-9.29e-05	2.05	7e-05	2.05	3.1e-05	2.05	0.0005598
	2.05167	-0.0001009	2.05167	6.57e-05	2.05167	8.05e-05	2.05167	0.0005345
	2.05333	-0.0001101	2.05333	5.95e-05	2.05333	0.0001265	2.05333	0.0005184
	2.055	-0.0001206	2.055	4.45e-05	2.055	0.0001368	2.055	0.0004641
	2.05667	-0.0001349	2.05667	3.58e-05	2.05667	6.32e-05	2.05667	0.0004043
	2.05833	-0.0001403	2.05833	2.31e-05	2.05833	7.1e-06	2.05833	0.0003543
	2.06	-0.000133	2.06	8e-06	2.06	-7.44e-05	2.06	0.0003304
	2.06167	-0.0001313	2.06167	1.09e-05	2.06167	-0.0001659	2.06167	0.000281
	2.06333	-0.0001275	2.06333	3.15e-05	2.06333	-0.0002783	2.06333	0.0003088
	2.065	-0.0001177	2.065	5.12e-05	2.065	-0.0003433	2.065	0.0003485
	2.06667	-0.0001011	2.06667	7.17e-05	2.06667	-0.0003763	2.06667	0.0003715
	2.06833	-8.73e-05	2.06833	8.61e-05	2.06833	-0.0003706	2.06833	0.000414
	2.07	-6.85e-05	2.07	8.95e-05	2.07	-0.0003308	2.07	0.0004514
	2.07167	-4.39e-05	2.07167	8.54e-05	2.07167	-0.0002561	2.07167	0.0004685
	2.07333	-2.52e-05	2.07333	8.63e-05	2.07333	-0.0001583	2.07333	0.0004584
	2.075	-2.19e-05	2.075	9.23e-05	2.075	-9.17e-05	2.075	0.0004436
	2.07667	-1.81e-05	2.07667	0.0001052	2.07667	-7.82e-05	2.07667	0.0004328
	2.07833	-1.5e-05	2.07833	0.0001137	2.07833	-0.0001137	2.07833	0.0004354
	2.08	-2.77e-05	2.08	0.0001196	2.08	-0.000114	2.08	0.0004428
	2.08167	-4.15e-05	2.08167	0.0001192	2.08167	-0.000186	2.08167	0.0004509
	2.08333	-4.62e-05	2.08333	0.0001109	2.08333	-0.0002154	2.08333	0.0004456
	2.085	-4.87e-05	2.085	0.0001041	2.085	-0.0002027	2.085	0.0004094
	2.08667	-5.51e-05	2.08667	9.66e-05	2.08667	-0.0001626	2.08667	0.0003933
	2.08833	-5.34e-05	2.08833	9.11e-05	2.08833	-0.0001861	2.08833	0.0003472
	2.09	-5.28e-05	2.09	8.94e-05	2.09	-0.0001551	2.09	0.0003264
	2.09167	-4.99e-05	2.09167	9.52e-05	2.09167	-0.0001732	2.09167	0.0003422
	2.09333	-5.63e-05	2.09333	9.37e-05	2.09333	-0.000173	2.09333	0.0003894
	2.095	-6.17e-05	2.095	9.5e-05	2.095	-0.0001941	2.095	0.0004309
	2.09667	-6.98e-05	2.09667	9.37e-05	2.09667	-0.0001719	2.09667	0.000467
	2.09833	-8.06e-05	2.09833	9.35e-05	2.09833	-0.0001281	2.09833	0.000491
	2.1	-0.000103	2.1	8.36e-05	2.1	-5.33e-05	2.1	0.0005239
	2.10167	-0.0001184	2.10167	8.3e-05	2.10167	-3.63e-05	2.10167	0.0005328
	2.10333	-0.0001321	2.10333	8.76e-05	2.10333	2.62e-05	2.10333	0.000549
	2.105	-0.00014	2.105	9.35e-05	2.105	4.52e-05	2.105	0.0005943
	2.10667	-0.0001378	2.10667	9.12e-05	2.10667	5.5e-06	2.10667	0.0006326
	2.10833	-0.0001262	2.10833	9.73e-05	2.10833	-3.35e-05	2.10833	0.0005892
	2.11	-0.0001129	2.11	9.63e-05	2.11	-3.72e-05	2.11	0.0005659
	2.11167	-0.000102	2.11167	9.4e-05	2.11167	-6.79e-05	2.11167	0.0004748
	2.11333	-9.06e-05	2.11333	9.29e-05	2.11333	-6.08e-05	2.11333	0.0003553
	2.115	-8.06e-05	2.115	9.29e-05	2.115	-8.1e-06	2.115	0.0002748
	2.11667	-8.17e-05	2.11667	9.35e-05	2.11667	3.9e-05	2.11667	0.000262
	2.11833	-8.34e-05	2.11833	9.14e-05	2.11833	0.0001071	2.11833	0.0002529
	2.12	-8.26e-05	2.12	8.55e-05	2.12	0.0001659	2.12	0.000304
	2.12167	-8.13e-05	2.12167	7.91e-05	2.12167	0.0002062	2.12167	0.0003704
	2.12333	-8.41e-05	2.12333	7.47e-05	2.12333	0.0002297	2.12333	0.0003773
	2.125	-7.54e-05	2.125	6.65e-05	2.125	0.0001926	2.125	0.0003926
	2.12667	-7.09e-05	2.12667	7.05e-05	2.12667	0.0001167	2.12667	0.0003985
	2.12833	-6.12e-05	2.12833	6.84e-05	2.12833	4.26e-05	2.12833	0.0003886
	2.13	-6.25e-05	2.13	6.61e-05	2.13	-3.95e-05	2.13	0.0003777
	2.13167	-5.7e-05	2.13167	7.17e-05	2.13167	-0.0001524	2.13167	0.0004136
	2.13333	-5.63e-05	2.13333	7.71e-05	2.13333	-0.0001802	2.13333	0.0004057
	2.135	-5.04e-05	2.135	7.29e-05	2.135	-0.0001788	2.135	0.000424
	2.13667	-4.92e-05	2.13667	7.39e-05	2.13667	-0.0001795	2.13667	0.0004701
	2.13833	-4.18e-05	2.13833	7.85e-05	2.13833	-0.0001628	2.13833	0.0004908
	2.14	-3.95e-05	2.14	7.71e-05	2.14	-6.32e-05	2.14	0.0005042
	2.14167	-3.51e-05	2.14167	7.41e-05	2.14167	-1.87e-05	2.14167	0.0005463
	2.14333	-3.17e-05	2.14333	7.8e-05	2.14333	-3.15e-05	2.14333	0.0005068
	2.145	-2.88e-05	2.145	8.94e-05	2.145	-5.12e-05	2.145	0.0004243
	2.14667	-3.44e-05	2.14667	9.76e-05	2.14667	-5.57e-05	2.14667	0.0003986
	2.14833	-3.76e-05	2.14833	9.89e-05	2.14833	-0.0001268	2.14833	0.0003549
	2.15	-3.57e-05	2.15	0.0001093	2.15	-0.0001969	2.15	0.000352
	2.15167	-3.38e-05	2.15167	0.0001139	2.15167	-0.0001972	2.15167	0.0003663
	2.15333	-3.15e-05	2.15333	0.0001123	2.15333	-0.0001407	2.15333	0.0003762
	2.155	-1.41e-05	2.155	0.0001122	2.155	-0.0001028	2.155	0.0003477
	2.15667	-9.3e-06	2.15667	0.000118	2.15667	-7.17e-05	2.15667	0.0003466
	2.15833	-7.6e-06	2.15833	0.0001087	2.15833	1.93e-05	2.15833	0.000273
	2.16	-1.14e-05	2.16	9.64e-05	2.16	6.8e-05	2.16	0.00025
	2.16167	-2.21e-05	2.16167	8.05e-05	2.16167	6.75e-05	2.16167	0.0002387
	2.16333	-3.78e-05	2.16333	6.72e-05	2.16333	4.06e-05	2.16333	0.000228
	2.165	-4.03e-05	2.165	5.98e-05	2.165	-1.3e-06	2.165	0.0001861
	2.16667	-4.61e-05	2.16667	6.83e-05	2.16667	-0.0001469	2.16667	0.0001612
	2.16833	-4.65e-05	2.16833	7.95e-05	2.16833	-0.0002748	2.16833	0.0001371
	2.17	-3.86e-05	2.17	9.18e-05	2.17	-0.0004111	2.17	0.0001574
	2.17167	-2.95e-05	2.17167	9.78e-05	2.17167	-0.000514	2.17167	0.0002079
	2.17333	-2.41e-05	2.17333	9.8e-05	2.17333	-0.0005578	2.17333	0.000259
	2.175	-2.91e-05	2.175	9.01e-05	2.175	-0.0004944	2.175	0.0002736
	2.17667	-3.24e-05	2.17667	8.52e-05	2.17667	-0.0004252	2.17667	0.0002503
	2.17833	-4.02e-05	2.17833	7.99e-05	2.17833	-0.0003482	2.17833	0.0001895
	2.18	-5.53e-05	2.18	7.52e-05	2.18	-0.0002583	2.18	7.79e-05
	2.18167	-7e-05	2.18167	7.95e-05	2.18167	-0.0001929	2.18167	-1.28e-05
	2.18333	-7.08e-05	2.18333	7.94e-05	2.18333	-0.0001978	2.18333	-2.01e-05
	2.185	-7.75e-05	2.185	8.96e-05	2.185	-0.0002212	2.185	1.87e-05
	2.18667	-8.28e-05	2.18667	0.0001077	2.18667	-0.0002255	2.18667	4.06e-05
	2.18833	-7.98e-05	2.18833	0.0001321	2.18833	-0.0002501	2.18833	0.0001132
	2.19	-7.92e-05	2.19	0.0001398	2.19	-0.0002401	2.19	0.0001748
	2.19167	-7.65e-05	2.19167	0.0001573	2.19167	-0.000162	2.19167	0.0002121
	2.19333	-7.19e-05	2.19333	0.0001602	2.19333	-2.57e-05	2.19333	0.0001956
	2.195	-6e-05	2.195	0.0001572	2.195	0.0001376	2.195	0.0002037
	2.19667	-5.41e-05	2.19667	0.0001431	2.19667	0.0003478	2.19667	0.0001944
	2.19833	-4.34e-05	2.19833	0.0001344	2.19833	0.0005357	2.19833	0.0001795
	2.2	-3.72e-05	2.2	0.0001237	2.2	0.0007492	2.2	0.0001509
	2.20167	-2.83e-05	2.20167	0.0001086	2.20167	0.0009577	2.20167	0.0001723
	2.20333	-3.01e-05	2.20333	0.000102	2.20333	0.00121	2.20333	0.0002281
	2.205	-2.38e-05	2.205	0.0001048	2.205	0.00145	2.205	0.0002918
	2.20667	-1.62e-05	2.20667	0.0001129	2.20667	0.00177	2.20667	0.0003873
	2.20833	-1.29e-05	2.20833	0.0001092	2.20833	0.00211	2.20833	0.0004633
	2.21	-1.48e-05	2.21	0.0001167	2.21	0.0025	2.21	0.0005129
	2.21167	-1.62e-05	2.21167	0.0001121	2.21167	0.00288	2.21167	0.000525
	2.21333	-2.74e-05	2.21333	9.6e-05	2.21333	0.00335	2.21333	0.0005254
	2.215	-4.34e-05	2.215	7.65e-05	2.215	0.00379	2.215	0.0005026
	2.21667	-4.86e-05	2.21667	7.73e-05	2.21667	0.00428	2.21667	0.0005171
	2.21833	-5.17e-05	2.21833	7.44e-05	2.21833	0.0048	2.21833	0.0005325
	2.22	-4.71e-05	2.22	7.68e-05	2.22	0.00538	2.22	0.0005043
	2.22167	-2.99e-05	2.22167	9.16e-05	2.22167	0.00591	2.22167	0.0004918
	2.22333	-1.36e-05	2.22333	0.0001057	2.22333	0.0065	2.22333	0.0004941
	2.225	-7.6e-06	2.225	0.0001059	2.225	0.00705	2.225	0.0004588
	2.22667	9.9e-06	2.22667	0.0001034	2.22667	0.00759	2.22667	0.0004439
	2.22833	3.18e-05	2.22833	9.64e-05	2.22833	0.00811	2.22833	0.0005231
	2.23	3.59e-05	2.23	8.99e-05	2.23	0.00872	2.23	0.0005834
	2.23167	4.66e-05	2.23167	8.42e-05	2.23167	0.00937	2.23167	0.0006185
	2.23333	6.11e-05	2.23333	7.75e-05	2.23333	0.01008	2.23333	0.00068
	2.235	5.76e-05	2.235	7.71e-05	2.235	0.01077	2.235	0.000725
	2.23667	3.54e-05	2.23667	8.85e-05	2.23667	0.01149	2.23667	0.0006683
	2.23833	2.85e-05	2.23833	8.96e-05	2.23833	0.01213	2.23833	0.0005613
	2.24	1.21e-05	2.24	9.46e-05	2.24	0.01268	2.24	0.0004682
	2.24167	-9.3e-06	2.24167	9.79e-05	2.24167	0.0132	2.24167	0.0003475
	2.24333	-1.28e-05	2.24333	9.96e-05	2.24333	0.01372	2.24333	0.000191
	2.245	-3.2e-06	2.245	8.99e-05	2.245	0.01424	2.245	0.0001187
	2.24667	-1e-06	2.24667	9.54e-05	2.24667	0.01478	2.24667	0.0001134
	2.24833	1.09e-05	2.24833	9.43e-05	2.24833	0.01536	2.24833	9.95e-05
	2.25	2.7e-05	2.25	0.0001055	2.25	0.01593	2.25	0.0001202
	2.25167	2.88e-05	2.25167	0.0001124	2.25167	0.01648	2.25167	0.0002301
	2.25333	2.7e-05	2.25333	0.0001287	2.25333	0.01697	2.25333	0.0002979
	2.255	3.06e-05	2.255	0.0001288	2.255	0.01744	2.255	0.0003662
	2.25667	2.87e-05	2.25667	0.0001335	2.25667	0.01779	2.25667	0.0004115
	2.25833	2.85e-05	2.25833	0.0001349	2.25833	0.01814	2.25833	0.0004314
	2.26	2.57e-05	2.26	0.0001402	2.26	0.01844	2.26	0.0003282
	2.26167	2.72e-05	2.26167	0.0001407	2.26167	0.01872	2.26167	0.0002302
	2.26333	1.69e-05	2.26333	0.000152	2.26333	0.01894	2.26333	9.71e-05
	2.265	5.2e-06	2.265	0.0001588	2.265	0.01915	2.265	-1.42e-05
	2.26667	-5.9e-06	2.26667	0.0001611	2.26667	0.01928	2.26667	-0.0001297
	2.26833	-7e-06	2.26833	0.0001599	2.26833	0.01936	2.26833	-0.0001442
	2.27	-1.12e-05	2.27	0.0001477	2.27	0.01941	2.27	-0.0001428
	2.27167	-4.5e-06	2.27167	0.0001344	2.27167	0.01944	2.27167	-0.0001211
	2.27333	7e-06	2.27333	0.0001211	2.27333	0.01948	2.27333	-6.43e-05
	2.275	1.06e-05	2.275	0.0001072	2.275	0.01954	2.275	3.34e-05
	2.27667	1.16e-05	2.27667	9.78e-05	2.27667	0.01959	2.27667	0.0001266
	2.27833	9.7e-06	2.27833	9.68e-05	2.27833	0.0196	2.27833	0.0002191
	2.28	1.2e-06	2.28	9.24e-05	2.28	0.01964	2.28	0.0003714
	2.28167	-3e-06	2.28167	9.93e-05	2.28167	0.0196	2.28167	0.0004604
	2.28333	2.1e-06	2.28333	0.0001008	2.28333	0.01956	2.28333	0.0005715
	2.285	9.4e-06	2.285	0.0001022	2.285	0.0195	2.285	0.0006174
	2.28667	2.57e-05	2.28667	0.0001077	2.28667	0.01941	2.28667	0.0006453
	2.28833	4.74e-05	2.28833	0.000117	2.28833	0.01923	2.28833	0.0005857
	2.29	5.57e-05	2.29	0.0001168	2.29	0.0191	2.29	0.0005908
	2.29167	5.77e-05	2.29167	0.0001318	2.29167	0.01892	2.29167	0.0005274
	2.29333	5.26e-05	2.29333	0.0001437	2.29333	0.01874	2.29333	0.0005092
	2.295	3.16e-05	2.295	0.0001491	2.295	0.01862	2.295	0.0004957
	2.29667	1.37e-05	2.29667	0.0001493	2.29667	0.01852	2.29667	0.0004856
	2.29833	3.8e-06	2.29833	0.0001498	2.29833	0.01841	2.29833	0.0004316
	2.3	6e-07	2.3	0.0001369	2.3	0.01831	2.3	0.0004096
	2.30167	2.1e-06	2.30167	0.0001249	2.30167	0.01818	2.30167	0.0003882
	2.30333	1.33e-05	2.30333	0.0001284	2.30333	0.018	2.30333	0.0003823
	2.305	1.76e-05	2.305	0.0001295	2.305	0.01782	2.305	0.0004106
	2.30667	1.63e-05	2.30667	0.000136	2.30667	0.01763	2.30667	0.0004323
	2.30833	-1.4e-06	2.30833	0.0001486	2.30833	0.01746	2.30833	0.0004451
	2.31	-1.25e-05	2.31	0.0001582	2.31	0.01727	2.31	0.0004836
	2.31167	-1.92e-05	2.31167	0.0001583	2.31167	0.01711	2.31167	0.0004998
	2.31333	-3.08e-05	2.31333	0.0001668	2.31333	0.01699	2.31333	0.0005301
	2.315	-4.04e-05	2.315	0.0001767	2.315	0.01691	2.315	0.0005939
	2.31667	-3.1e-05	2.31667	0.000186	2.31667	0.01688	2.31667	0.0006826
	2.31833	-4.48e-05	2.31833	0.0002006	2.31833	0.01699	2.31833	0.0007188
	2.32	-6.93e-05	2.32	0.0002058	2.32	0.0171	2.32	0.0007724
	2.32167	-8.25e-05	2.32167	0.0002077	2.32167	0.01724	2.32167	0.0007715
	2.32333	-9.31e-05	2.32333	0.0001879	2.32333	0.01739	2.32333	0.0007667
	2.325	-0.0001116	2.325	0.0001662	2.325	0.01752	2.325	0.000698
	2.32667	-0.0001112	2.32667	0.0001391	2.32667	0.01766	2.32667	0.0006748
	2.32833	-9.9e-05	2.32833	0.0001173	2.32833	0.01794	2.32833	0.0006267
	2.33	-9.64e-05	2.33	9.56e-05	2.33	0.01826	2.33	0.0006459
	2.33167	-8.93e-05	2.33167	0.0001004	2.33167	0.01869	2.33167	0.0006624
	2.33333	-7.21e-05	2.33333	0.0001113	2.33333	0.01921	2.33333	0.0007294
	2.335	-5.55e-05	2.335	0.0001273	2.335	0.01976	2.335	0.0007474
	2.33667	-4.87e-05	2.33667	0.0001513	2.33667	0.02026	2.33667	0.0008079
	2.33833	-2.98e-05	2.33833	0.0001691	2.33833	0.02078	2.33833	0.0008467
	2.34	-1.81e-05	2.34	0.0001747	2.34	0.02126	2.34	0.0008658
	2.34167	-1.68e-05	2.34167	0.000171	2.34167	0.02176	2.34167	0.0009041
	2.34333	-1.2e-05	2.34333	0.0001666	2.34333	0.02229	2.34333	0.00103
	2.345	-2e-06	2.345	0.0001544	2.345	0.02289	2.345	0.00112
	2.34667	-2.9e-06	2.34667	0.0001593	2.34667	0.02351	2.34667	0.00118
	2.34833	6.3e-06	2.34833	0.0001629	2.34833	0.02415	2.34833	0.00127
	2.35	1.34e-05	2.35	0.0001752	2.35	0.02473	2.35	0.0013
	2.35167	1.54e-05	2.35167	0.0001819	2.35167	0.02532	2.35167	0.00124
	2.35333	1.7e-05	2.35333	0.000193	2.35333	0.02583	2.35333	0.00122
	2.355	2.47e-05	2.355	0.0001847	2.355	0.0263	2.355	0.00124
	2.35667	1.77e-05	2.35667	0.0001893	2.35667	0.02677	2.35667	0.00125
	2.35833	1.8e-05	2.35833	0.0001896	2.35833	0.0273	2.35833	0.00133
	2.36	1.19e-05	2.36	0.0002055	2.36	0.02776	2.36	0.00149
	2.36167	5.1e-06	2.36167	0.0002178	2.36167	0.02819	2.36167	0.00159
	2.36333	-1.4e-06	2.36333	0.000238	2.36333	0.02855	2.36333	0.00172
	2.365	7.8e-06	2.365	0.0002412	2.365	0.02887	2.365	0.00186
	2.36667	6.7e-06	2.36667	0.0002506	2.36667	0.02912	2.36667	0.00193
	2.36833	1.34e-05	2.36833	0.000237	2.36833	0.02933	2.36833	0.00197
	2.37	2.03e-05	2.37	0.0002203	2.37	0.02955	2.37	0.00203
	2.37167	2.27e-05	2.37167	0.0002077	2.37167	0.02986	2.37167	0.00204
	2.37333	1.14e-05	2.37333	0.0002088	2.37333	0.03012	2.37333	0.00207
	2.375	7.3e-06	2.375	0.000196	2.375	0.0303	2.375	0.00215
	2.37667	2.3e-06	2.37667	0.000202	2.37667	0.03049	2.37667	0.00225
	2.37833	1.1e-06	2.37833	0.0002153	2.37833	0.03068	2.37833	0.00239
	2.38	1.2e-06	2.38	0.0002213	2.38	0.03074	2.38	0.00256
	2.38167	1.1e-05	2.38167	0.0002163	2.38167	0.03084	2.38167	0.00272
	2.38333	1.94e-05	2.38333	0.000223	2.38333	0.03103	2.38333	0.0029
	2.385	2.44e-05	2.385	0.0002149	2.385	0.03129	2.385	0.0031
	2.38667	2.25e-05	2.38667	0.0002008	2.38667	0.03157	2.38667	0.00323
	2.38833	1.72e-05	2.38833	0.000198	2.38833	0.03193	2.38833	0.00334
	2.39	3.3e-06	2.39	0.0001988	2.39	0.03228	2.39	0.00349
	2.39167	-7.7e-06	2.39167	0.0001981	2.39167	0.03259	2.39167	0.0036
	2.39333	-1.09e-05	2.39333	0.0002047	2.39333	0.0328	2.39333	0.00371
	2.395	-1.34e-05	2.395	0.0002269	2.395	0.03294	2.395	0.00391
	2.39667	-1.05e-05	2.39667	0.0002393	2.39667	0.0331	2.39667	0.00412
	2.39833	-3e-07	2.39833	0.0002601	2.39833	0.03322	2.39833	0.00431
	2.4	6.6e-06	2.4	0.0002736	2.4	0.03338	2.4	0.00453
	2.40167	1.08e-05	2.40167	0.0002851	2.40167	0.03353	2.40167	0.00475
	2.40333	2.02e-05	2.40333	0.0002747	2.40333	0.03369	2.40333	0.00492
	2.405	2.76e-05	2.405	0.0002679	2.405	0.03375	2.405	0.00509
	2.40667	2.6e-05	2.40667	0.0002485	2.40667	0.03381	2.40667	0.00531
	2.40833	2.77e-05	2.40833	0.0002328	2.40833	0.03373	2.40833	0.00552
	2.41	2.19e-05	2.41	0.0002318	2.41	0.03363	2.41	0.0057
	2.41167	1.2e-05	2.41167	0.0002376	2.41167	0.03346	2.41167	0.00591
	2.41333	1.8e-06	2.41333	0.0002329	2.41333	0.03325	2.41333	0.00615
	2.415	9.2e-06	2.415	0.0002383	2.415	0.03299	2.415	0.00637
	2.41667	9.6e-06	2.41667	0.0002487	2.41667	0.03273	2.41667	0.00665
	2.41833	2.05e-05	2.41833	0.000244	2.41833	0.03245	2.41833	0.00701
	2.42	3.36e-05	2.42	0.0002448	2.42	0.03218	2.42	0.00736
	2.42167	4.19e-05	2.42167	0.0002602	2.42167	0.03185	2.42167	0.00772
	2.42333	3.04e-05	2.42333	0.0002684	2.42333	0.03147	2.42333	0.00812
	2.425	2.29e-05	2.425	0.000273	2.425	0.03108	2.425	0.00851
	2.42667	3.9e-06	2.42667	0.0002806	2.42667	0.03062	2.42667	0.00885
	2.42833	-1.31e-05	2.42833	0.0002791	2.42833	0.03011	2.42833	0.00924
	2.43	-2.38e-05	2.43	0.0002683	2.43	0.02966	2.43	0.00961
	2.43167	-2.11e-05	2.43167	0.0002586	2.43167	0.02919	2.43167	0.00994
	2.43333	-1.35e-05	2.43333	0.0002429	2.43333	0.02875	2.43333	0.01028
	2.435	-8.2e-06	2.435	0.0002226	2.435	0.02837	2.435	0.0107
	2.43667	-7.1e-06	2.43667	0.0002049	2.43667	0.02799	2.43667	0.01117
	2.43833	1.9e-06	2.43833	0.0001953	2.43833	0.02762	2.43833	0.01171
	2.44	0	2.44	0.0001891	2.44	0.0273	2.44	0.01235
	2.44167	-1.16e-05	2.44167	0.0001962	2.44167	0.027	2.44167	0.01303
	2.44333	-9.1e-06	2.44333	0.0002132	2.44333	0.02672	2.44333	0.01369
	2.445	-3.4e-06	2.445	0.0002339	2.445	0.02651	2.445	0.01433
	2.44667	-1.28e-05	2.44667	0.0002527	2.44667	0.02625	2.44667	0.01496
	2.44833	-1.87e-05	2.44833	0.0002719	2.44833	0.026	2.44833	0.01558
	2.45	-2.36e-05	2.45	0.0002783	2.45	0.02572	2.45	0.01621
	2.45167	-3.41e-05	2.45167	0.0002705	2.45167	0.02538	2.45167	0.01693
	2.45333	-5.16e-05	2.45333	0.0002641	2.45333	0.02496	2.45333	0.01765
	2.455	-6.04e-05	2.455	0.0002451	2.455	0.02457	2.455	0.01839
	2.45667	-5.63e-05	2.45667	0.0002215	2.45667	0.02415	2.45667	0.01913
	2.45833	-3.74e-05	2.45833	0.0001958	2.45833	0.0237	2.45833	0.01991
	2.46	-2.68e-05	2.46	0.0001879	2.46	0.02332	2.46	0.02071
	2.46167	-1.09e-05	2.46167	0.0001836	2.46167	0.02302	2.46167	0.02163
	2.46333	9.1e-06	2.46333	0.0001976	2.46333	0.02277	2.46333	0.02266
	2.465	1.07e-05	2.465	0.0002064	2.465	0.02253	2.465	0.02374
	2.46667	-6.4e-06	2.46667	0.0002301	2.46667	0.02237	2.46667	0.02496
	2.46833	-9.3e-06	2.46833	0.0002455	2.46833	0.02214	2.46833	0.02617
	2.47	-1.15e-05	2.47	0.000252	2.47	0.02182	2.47	0.02737
	2.47167	-3e-05	2.47167	0.0002479	2.47167	0.02145	2.47167	0.02856
	2.47333	-3.86e-05	2.47333	0.000258	2.47333	0.02102	2.47333	0.02984
	2.475	-3.7e-05	2.475	0.0002582	2.475	0.02056	2.475	0.03106
	2.47667	-4.36e-05	2.47667	0.0002578	2.47667	0.02012	2.47667	0.03248
	2.47833	-4.72e-05	2.47833	0.000256	2.47833	0.01973	2.47833	0.03396
	2.48	-3.42e-05	2.48	0.0002568	2.48	0.01934	2.48	0.03555
	2.48167	-2.27e-05	2.48167	0.0002454	2.48167	0.01901	2.48167	0.03722
	2.48333	-8.5e-06	2.48333	0.000237	2.48333	0.01867	2.48333	0.03902
	2.485	7.6e-06	2.485	0.0002253	2.485	0.01838	2.485	0.04085
	2.48667	2.02e-05	2.48667	0.0002184	2.48667	0.0181	2.48667	0.04285
	2.48833	2.16e-05	2.48833	0.0002127	2.48833	0.01781	2.48833	0.04498
	2.49	2.79e-05	2.49	0.0002137	2.49	0.01756	2.49	0.04729
	2.49167	2.68e-05	2.49167	0.0002171	2.49167	0.01729	2.49167	0.04982
	2.49333	2.76e-05	2.49333	0.000221	2.49333	0.01693	2.49333	0.05258
	2.495	2.33e-05	2.495	0.0002304	2.495	0.01648	2.495	0.05546
	2.49667	2.1e-05	2.49667	0.0002416	2.49667	0.01601	2.49667	0.05852
	2.49833	8.7e-06	2.49833	0.0002512	2.49833	0.01548	2.49833	0.06178
	2.5	-5.6e-06	2.5	0.0002574	2.5	0.01495	2.5	0.0653
	2.50167	-2.83e-05	2.50167	0.0002615	2.50167	0.01449	2.50167	0.06914
	2.50333	-4.08e-05	2.50333	0.0002563	2.50333	0.0141	2.50333	0.07349
	2.505	-5.3e-05	2.505	0.0002435	2.505	0.01371	2.505	0.0783
	2.50667	-6.57e-05	2.50667	0.0002294	2.50667	0.01335	2.50667	0.08359
	2.50833	-6.65e-05	2.50833	0.0002176	2.50833	0.01296	2.50833	0.08931
	2.51	-5.16e-05	2.51	0.0002199	2.51	0.01254	2.51	0.09545
	2.51167	-4.82e-05	2.51167	0.0002266	2.51167	0.0121	2.51167	0.10191
	2.51333	-3.02e-05	2.51333	0.000239	2.51333	0.0116	2.51333	0.10877
	2.515	-9.1e-06	2.515	0.0002552	2.515	0.01109	2.515	0.11607
	2.51667	1e-06	2.51667	0.0002642	2.51667	0.01061	2.51667	0.12373
	2.51833	1.6e-06	2.51833	0.0002658	2.51833	0.01014	2.51833	0.13168
	2.52	9e-06	2.52	0.0002663	2.52	0.00969	2.52	0.13989
	2.52167	-6.8e-06	2.52167	0.0002614	2.52167	0.00934	2.52167	0.14824
	2.52333	-8.6e-06	2.52333	0.0002542	2.52333	0.00901	2.52333	0.15657
	2.525	-9.4e-06	2.525	0.0002566	2.525	0.00867	2.525	0.16497
	2.52667	-1.72e-05	2.52667	0.0002525	2.52667	0.00835	2.52667	0.17341
	2.52833	-2.02e-05	2.52833	0.0002578	2.52833	0.00802	2.52833	0.18177
	2.53	-9.1e-06	2.53	0.0002694	2.53	0.00765	2.53	0.19009
	2.53167	-2.06e-05	2.53167	0.0002838	2.53167	0.00725	2.53167	0.1984
	2.53333	-3.11e-05	2.53333	0.000295	2.53333	0.00686	2.53333	0.20654
	2.535	-2.91e-05	2.535	0.0003106	2.535	0.00643	2.535	0.21452
	2.53667	-4e-05	2.53667	0.0003134	2.53667	0.00597	2.53667	0.22248
	2.53833	-5.59e-05	2.53833	0.0003165	2.53833	0.00552	2.53833	0.2303
	2.54	-6.2e-05	2.54	0.0003212	2.54	0.0051	2.54	0.23795
	2.54167	-5.44e-05	2.54167	0.0003248	2.54167	0.00467	2.54167	0.24553
	2.54333	-5.84e-05	2.54333	0.0003357	2.54333	0.0043	2.54333	0.25303
	2.545	-4.63e-05	2.545	0.0003468	2.545	0.00393	2.545	0.26029
	2.54667	-3.14e-05	2.54667	0.0003616	2.54667	0.00356	2.54667	0.2674
	2.54833	-1.74e-05	2.54833	0.0003695	2.54833	0.00323	2.54833	0.27436
	2.55	-1.53e-05	2.55	0.0003775	2.55	0.00288	2.55	0.28116
	2.55167	8.3e-06	2.55167	0.0003818	2.55167	0.00251	2.55167	0.28781
	2.55333	1.34e-05	2.55333	0.0003856	2.55333	0.00217	2.55333	0.29429
	2.555	2.26e-05	2.555	0.000377	2.555	0.0018	2.555	0.30063
	2.55667	3.71e-05	2.55667	0.000365	2.55667	0.00134	2.55667	0.30678
	2.55833	4.16e-05	2.55833	0.0003531	2.55833	0.000929	2.55833	0.3127
	2.56	1.42e-05	2.56	0.0003359	2.56	0.0004725	2.56	0.31834
	2.56167	-4e-06	2.56167	0.0003293	2.56167	4.95e-05	2.56167	0.32391
	2.56333	-3.19e-05	2.56333	0.0003268	2.56333	-0.0003005	2.56333	0.3293
	2.565	-5.89e-05	2.565	0.000331	2.565	-0.0006009	2.565	0.33464
	2.56667	-7.29e-05	2.56667	0.000332	2.56667	-0.0009614	2.56667	0.33994
	2.56833	-6.89e-05	2.56833	0.0003311	2.56833	-0.00124	2.56833	0.34513
	2.57	-5.91e-05	2.57	0.0003249	2.57	-0.00155	2.57	0.35017
	2.57167	-4.86e-05	2.57167	0.0003269	2.57167	-0.00186	2.57167	0.35517
	2.57333	-4.4e-05	2.57333	0.0003262	2.57333	-0.00216	2.57333	0.36006
	2.575	-3.09e-05	2.575	0.0003283	2.575	-0.00239	2.575	0.36482
	2.57667	-1.57e-05	2.57667	0.0003374	2.57667	-0.00266	2.57667	0.36961
	2.57833	-1.8e-06	2.57833	0.0003376	2.57833	-0.0029	2.57833	0.37433
	2.58	1.95e-05	2.58	0.0003243	2.58	-0.00314	2.58	0.37888
	2.58167	4.68e-05	2.58167	0.0003156	2.58167	-0.00336	2.58167	0.38334
	2.58333	4.98e-05	2.58333	0.0003103	2.58333	-0.00359	2.58333	0.38762
	2.585	5.42e-05	2.585	0.0002951	2.585	-0.00379	2.585	0.39173
	2.58667	4.84e-05	2.58667	0.0002959	2.58667	-0.004	2.58667	0.39574
	2.58833	3.76e-05	2.58833	0.0003087	2.58833	-0.00427	2.58833	0.39977
	2.59	1.75e-05	2.59	0.0003203	2.59	-0.00454	2.59	0.40355
	2.59167	1.59e-05	2.59167	0.0003285	2.59167	-0.00482	2.59167	0.40752
	2.59333	1.1e-06	2.59333	0.0003505	2.59333	-0.0051	2.59333	0.41144
	2.595	-9.7e-06	2.595	0.0003621	2.595	-0.00534	2.595	0.41529
	2.59667	-1.56e-05	2.59667	0.0003655	2.59667	-0.00546	2.59667	0.41896
	2.59833	-2.37e-05	2.59833	0.0003647	2.59833	-0.0056	2.59833	0.4229
	2.6	-4.13e-05	2.6	0.0003626	2.6	-0.00571	2.6	0.42648
	2.60167	-5.01e-05	2.60167	0.0003451	2.60167	-0.0058	2.60167	0.43003
	2.60333	-5.5e-05	2.60333	0.0003266	2.60333	-0.00592	2.60333	0.43358
	2.605	-6.33e-05	2.605	0.000317	2.605	-0.00608	2.605	0.43712
	2.60667	-5.76e-05	2.60667	0.0003141	2.60667	-0.0062	2.60667	0.44036
	2.60833	-4.62e-05	2.60833	0.000312	2.60833	-0.00635	2.60833	0.44381
	2.61	-2.77e-05	2.61	0.000327	2.61	-0.00649	2.61	0.44704
	2.61167	-5.4e-06	2.61167	0.0003484	2.61167	-0.00659	2.61167	0.45022
	2.61333	1.77e-05	2.61333	0.0003672	2.61333	-0.00673	2.61333	0.45336
	2.615	2.89e-05	2.615	0.0003779	2.615	-0.00689	2.615	0.45665
	2.61667	4.21e-05	2.61667	0.0003943	2.61667	-0.00703	2.61667	0.45976
	2.61833	4.21e-05	2.61833	0.0003999	2.61833	-0.00716	2.61833	0.46315
	2.62	3.41e-05	2.62	0.0004096	2.62	-0.0073	2.62	0.46658
	2.62167	2.44e-05	2.62167	0.0004097	2.62167	-0.00738	2.62167	0.47016
	2.62333	3.08e-05	2.62333	0.0004239	2.62333	-0.00748	2.62333	0.47353
	2.625	3.27e-05	2.625	0.000429	2.625	-0.00758	2.625	0.47698
	2.62667	3.87e-05	2.62667	0.0004443	2.62667	-0.00774	2.62667	0.48025
	2.62833	4.88e-05	2.62833	0.0004405	2.62833	-0.00788	2.62833	0.48329
	2.63	5.18e-05	2.63	0.0004437	2.63	-0.00805	2.63	0.48611
	2.63167	4.26e-05	2.63167	0.0004368	2.63167	-0.00818	2.63167	0.48891
	2.63333	2.4e-05	2.63333	0.000436	2.63333	-0.00833	2.63333	0.49163
	2.635	4.9e-06	2.635	0.0004219	2.635	-0.00842	2.635	0.49431
	2.63667	-1.86e-05	2.63667	0.0004251	2.63667	-0.00858	2.63667	0.49707
	2.63833	-2.32e-05	2.63833	0.0004347	2.63833	-0.00873	2.63833	0.49989
	2.64	-3.24e-05	2.64	0.0004326	2.64	-0.0089	2.64	0.50276
	2.64167	-3.09e-05	2.64167	0.000424	2.64167	-0.00904	2.64167	0.50555
	2.64333	-2.2e-05	2.64333	0.0004159	2.64333	-0.0092	2.64333	0.50844
	2.645	-7.5e-06	2.645	0.0003982	2.645	-0.00934	2.645	0.51141
	2.64667	-1.18e-05	2.64667	0.0003689	2.64667	-0.00946	2.64667	0.51432
	2.64833	-1.17e-05	2.64833	0.0003528	2.64833	-0.00961	2.64833	0.51739
	2.65	-5.5e-06	2.65	0.0003351	2.65	-0.00982	2.65	0.52051
	2.65167	-1.52e-05	2.65167	0.0003141	2.65167	-0.00997	2.65167	0.52351
	2.65333	-2.92e-05	2.65333	0.0002868	2.65333	-0.01015	2.65333	0.52636
	2.655	-4.65e-05	2.655	0.0002487	2.655	-0.01032	2.655	0.52919
	2.65667	-7e-05	2.65667	0.0001962	2.65667	-0.01042	2.65667	0.53174
	2.65833	-0.0001097	2.65833	0.000142	2.65833	-0.01047	2.65833	0.53419
	2.66	-0.0001452	2.66	8.5e-05	2.66	-0.01053	2.66	0.5368
	2.66167	-0.0001865	2.66167	2.59e-05	2.66167	-0.01055	2.66167	0.53948
	2.66333	-0.0002172	2.66333	-3.14e-05	2.66333	-0.01057	2.66333	0.54213
	2.665	-0.000251	2.665	-8.96e-05	2.665	-0.01065	2.665	0.54484
	2.66667	-0.0002864	2.66667	-0.0001513	2.66667	-0.01078	2.66667	0.54776
	2.66833	-0.0003285	2.66833	-0.0002132	2.66833	-0.01091	2.66833	0.55048
	2.67	-0.000381	2.67	-0.0002814	2.67	-0.0111	2.67	0.55306
	2.67167	-0.0004513	2.67167	-0.0003439	2.67167	-0.0113	2.67167	0.55587
	2.67333	-0.0005316	2.67333	-0.0004002	2.67333	-0.01141	2.67333	0.55872
	2.675	-0.0006166	2.675	-0.0004576	2.675	-0.01147	2.675	0.56126
	2.67667	-0.0007038	2.67667	-0.0005192	2.67667	-0.01155	2.67667	0.56379
	2.67833	-0.000788	2.67833	-0.0005532	2.67833	-0.01163	2.67833	0.56629
	2.68	-0.0008629	2.68	-0.000582	2.68	-0.01172	2.68	0.56835
	2.68167	-0.0009303	2.68167	-0.0006086	2.68167	-0.01187	2.68167	0.57028
	2.68333	-0.0009848	2.68333	-0.0006288	2.68333	-0.0121	2.68333	0.57238
	2.685	-0.00103	2.685	-0.0006265	2.685	-0.01232	2.685	0.5745
	2.68667	-0.00105	2.68667	-0.0006407	2.68667	-0.01246	2.68667	0.57676
	2.68833	-0.00107	2.68833	-0.000647	2.68833	-0.01264	2.68833	0.57927
	2.69	-0.00108	2.69	-0.0006417	2.69	-0.01286	2.69	0.58175
	2.69167	-0.0011	2.69167	-0.0006197	2.69167	-0.01305	2.69167	0.58401
	2.69333	-0.00112	2.69333	-0.0006046	2.69333	-0.01331	2.69333	0.5861
	2.695	-0.00115	2.695	-0.000577	2.695	-0.01366	2.695	0.58806
	2.69667	-0.00116	2.69667	-0.0005521	2.69667	-0.01399	2.69667	0.58994
	2.69833	-0.00117	2.69833	-0.0005348	2.69833	-0.01433	2.69833	0.59184
	2.7	-0.00115	2.7	-0.0005245	2.7	-0.01478	2.7	0.59396
	2.70167	-0.00112	2.70167	-0.0005133	2.70167	-0.01522	2.70167	0.59625
	2.70333	-0.00108	2.70333	-0.0005014	2.70333	-0.01569	2.70333	0.5986
	2.705	-0.00104	2.705	-0.0004879	2.705	-0.01625	2.705	0.60105
	2.70667	-0.00101	2.70667	-0.0004727	2.70667	-0.01683	2.70667	0.60363
	2.70833	-0.0009856	2.70833	-0.0004602	2.70833	-0.01734	2.70833	0.60629
	2.71	-0.0009767	2.71	-0.0004467	2.71	-0.01786	2.71	0.60909
	2.71167	-0.0009797	2.71167	-0.0004471	2.71167	-0.01837	2.71167	0.61205
	2.71333	-0.0009822	2.71333	-0.0004555	2.71333	-0.01883	2.71333	0.61508
	2.715	-0.0009807	2.715	-0.0004672	2.715	-0.01923	2.715	0.61818
	2.71667	-0.000975	2.71667	-0.0004908	2.71667	-0.01963	2.71667	0.62143
	2.71833	-0.0009753	2.71833	-0.0005264	2.71833	-0.01998	2.71833	0.62466
	2.72	-0.0009649	2.72	-0.0005505	2.72	-0.02034	2.72	0.62811
	2.72167	-0.0009645	2.72167	-0.0005639	2.72167	-0.02069	2.72167	0.63174
	2.72333	-0.000978	2.72333	-0.0005753	2.72333	-0.0211	2.72333	0.63567
	2.725	-0.001	2.725	-0.0005718	2.725	-0.02155	2.725	0.6396
	2.72667	-0.00102	2.72667	-0.0005506	2.72667	-0.02208	2.72667	0.6435
	2.72833	-0.00104	2.72833	-0.000529	2.72833	-0.02271	2.72833	0.64696
	2.73	-0.00106	2.73	-0.0005139	2.73	-0.02344	2.73	0.65033
	2.73167	-0.00107	2.73167	-0.000493	2.73167	-0.02423	2.73167	0.65325
	2.73333	-0.00106	2.73333	-0.00047	2.73333	-0.02508	2.73333	0.65593
	2.735	-0.00104	2.735	-0.000461	2.735	-0.02602	2.735	0.65853
	2.73667	-0.00102	2.73667	-0.0004455	2.73667	-0.02695	2.73667	0.6613
	2.73833	-0.0009796	2.73833	-0.0004278	2.73833	-0.02788	2.73833	0.66364
	2.74	-0.0009411	2.74	-0.0004112	2.74	-0.02883	2.74	0.66568
	2.74167	-0.0009033	2.74167	-0.0003969	2.74167	-0.02988	2.74167	0.66743
	2.74333	-0.0008737	2.74333	-0.0003585	2.74333	-0.03092	2.74333	0.66877
	2.745	-0.0008401	2.745	-0.0003279	2.745	-0.03202	2.745	0.66942
	2.74667	-0.0008198	2.74667	-0.0002985	2.74667	-0.03313	2.74667	0.66991
	2.74833	-0.0007974	2.74833	-0.0002674	2.74833	-0.03429	2.74833	0.67028
	2.75	-0.0007723	2.75	-0.0002358	2.75	-0.03542	2.75	0.67045
	2.75167	-0.0007359	2.75167	-0.0002101	2.75167	-0.03657	2.75167	0.6703
	2.75333	-0.000708	2.75333	-0.0001762	2.75333	-0.03773	2.75333	0.67002
	2.755	-0.0006731	2.755	-0.0001251	2.755	-0.03891	2.755	0.66914
	2.75667	-0.0006382	2.75667	-7.14e-05	2.75667	-0.04007	2.75667	0.66781
	2.75833	-0.0006093	2.75833	-1.49e-05	2.75833	-0.04122	2.75833	0.66604
	2.76	-0.00059	2.76	2.85e-05	2.76	-0.04235	2.76	0.66396
	2.76167	-0.0005651	2.76167	6.48e-05	2.76167	-0.04348	2.76167	0.66175
	2.76333	-0.0005295	2.76333	8.12e-05	2.76333	-0.04458	2.76333	0.65973
	2.765	-0.0004867	2.765	9.67e-05	2.765	-0.04563	2.765	0.65762
	2.76667	-0.0004368	2.76667	0.0001117	2.76667	-0.04666	2.76667	0.65527
	2.76833	-0.00038	2.76833	0.0001411	2.76833	-0.04761	2.76833	0.65306
	2.77	-0.000321	2.77	0.000173	2.77	-0.0485	2.77	0.65054
	2.77167	-0.0002709	2.77167	0.000225	2.77167	-0.04944	2.77167	0.64758
	2.77333	-0.0002263	2.77333	0.0002717	2.77333	-0.0504	2.77333	0.64439
	2.775	-0.0001852	2.775	0.0003158	2.775	-0.05138	2.775	0.64117
	2.77667	-0.0001478	2.77667	0.0003411	2.77667	-0.05244	2.77667	0.63767
	2.77833	-0.0001238	2.77833	0.0003594	2.77833	-0.05352	2.77833	0.63412
	2.78	-9.78e-05	2.78	0.0003579	2.78	-0.0545	2.78	0.63056
	2.78167	-7.57e-05	2.78167	0.0003619	2.78167	-0.05544	2.78167	0.62681
	2.78333	-5.77e-05	2.78333	0.0003681	2.78333	-0.05634	2.78333	0.623
	2.785	-3.91e-05	2.785	0.0003944	2.785	-0.05708	2.785	0.61883
	2.78667	-1.13e-05	2.78667	0.000432	2.78667	-0.05774	2.78667	0.61438
	2.78833	1.27e-05	2.78833	0.0004695	2.78833	-0.05837	2.78833	0.60985
	2.79	3.89e-05	2.79	0.0005041	2.79	-0.05901	2.79	0.60529
	2.79167	6.48e-05	2.79167	0.0005326	2.79167	-0.05962	2.79167	0.60042
	2.79333	8.27e-05	2.79333	0.0005439	2.79333	-0.06027	2.79333	0.59556
	2.795	0.0001002	2.795	0.0005416	2.795	-0.06094	2.795	0.59071
	2.79667	0.0001173	2.79667	0.000545	2.79667	-0.06155	2.79667	0.58544
	2.79833	0.0001365	2.79833	0.0005397	2.79833	-0.06205	2.79833	0.57994
	2.8	0.000157	2.8	0.0005278	2.8	-0.06252	2.8	0.57447
	2.80167	0.0001831	2.80167	0.0005126	2.80167	-0.06292	2.80167	0.56891
	2.80333	0.0002142	2.80333	0.0005007	2.80333	-0.06328	2.80333	0.56318
	2.805	0.0002441	2.805	0.000479	2.805	-0.06365	2.805	0.55753
	2.80667	0.0002663	2.80667	0.0004616	2.80667	-0.06396	2.80667	0.55191
	2.80833	0.0002904	2.80833	0.0004543	2.80833	-0.06427	2.80833	0.54615
	2.81	0.0003166	2.81	0.0004553	2.81	-0.06453	2.81	0.54025
	2.81167	0.0003232	2.81167	0.0004529	2.81167	-0.06471	2.81167	0.53423
	2.81333	0.0003282	2.81333	0.0004579	2.81333	-0.06486	2.81333	0.52824
	2.815	0.0003273	2.815	0.0004575	2.815	-0.06508	2.815	0.52226
	2.81667	0.0003162	2.81667	0.0004537	2.81667	-0.06523	2.81667	0.51626
	2.81833	0.0002944	2.81833	0.0004456	2.81833	-0.06539	2.81833	0.51022
	2.82	0.0002882	2.82	0.000435	2.82	-0.06554	2.82	0.50425
	2.82167	0.0002756	2.82167	0.0004137	2.82167	-0.06568	2.82167	0.49826
	2.82333	0.0002628	2.82333	0.0003942	2.82333	-0.06574	2.82333	0.49205
	2.825	0.0002501	2.825	0.0003657	2.825	-0.06579	2.825	0.48588
	2.82667	0.0002379	2.82667	0.0003319	2.82667	-0.06583	2.82667	0.47993
	2.82833	0.0002091	2.82833	0.0002979	2.82833	-0.0659	2.82833	0.47406
	2.83	0.0001809	2.83	0.0002759	2.83	-0.06596	2.83	0.46815
	2.83167	0.0001514	2.83167	0.0002567	2.83167	-0.06603	2.83167	0.46253
	2.83333	0.0001197	2.83333	0.0002384	2.83333	-0.06611	2.83333	0.45704
	2.835	8.38e-05	2.835	0.0002293	2.835	-0.06618	2.835	0.45138
	2.83667	5.22e-05	2.83667	0.0002248	2.83667	-0.06622	2.83667	0.44577
	2.83833	1.65e-05	2.83833	0.0002121	2.83833	-0.06624	2.83833	0.44029
	2.84	-7.7e-06	2.84	0.0002013	2.84	-0.06626	2.84	0.43474
	2.84167	-2.99e-05	2.84167	0.000196	2.84167	-0.06629	2.84167	0.42917
	2.84333	-4.84e-05	2.84333	0.0001917	2.84333	-0.0663	2.84333	0.42381
	2.845	-6.52e-05	2.845	0.0001973	2.845	-0.06634	2.845	0.41847
	2.84667	-7.66e-05	2.84667	0.0002253	2.84667	-0.06641	2.84667	0.4132
	2.84833	-9.83e-05	2.84833	0.000256	2.84833	-0.06649	2.84833	0.40812
	2.85	-0.0001055	2.85	0.0003012	2.85	-0.06653	2.85	0.40321
	2.85167	-0.000104	2.85167	0.0003487	2.85167	-0.06657	2.85167	0.39841
	2.85333	-8.45e-05	2.85333	0.0004007	2.85333	-0.06662	2.85333	0.39378
	2.855	-6.27e-05	2.855	0.0004386	2.855	-0.06667	2.855	0.38924
	2.85667	-3.14e-05	2.85667	0.0004904	2.85667	-0.06671	2.85667	0.38469
	2.85833	-9.3e-06	2.85833	0.0005436	2.85833	-0.06681	2.85833	0.38017
	2.86	1.57e-05	2.86	0.0006059	2.86	-0.06693	2.86	0.37572
	2.86167	2.46e-05	2.86167	0.000676	2.86167	-0.06697	2.86167	0.37132
	2.86333	5.38e-05	2.86333	0.0007647	2.86333	-0.06697	2.86333	0.36703
	2.865	0.0001035	2.865	0.00085	2.865	-0.06699	2.865	0.36293
	2.86667	0.0001696	2.86667	0.0009395	2.86667	-0.06698	2.86667	0.359
	2.86833	0.0002475	2.86833	0.00104	2.86833	-0.06696	2.86833	0.3551
	2.87	0.0003474	2.87	0.00114	2.87	-0.06699	2.87	0.35133
	2.87167	0.0004463	2.87167	0.00124	2.87167	-0.06707	2.87167	0.34768
	2.87333	0.0005322	2.87333	0.00134	2.87333	-0.06714	2.87333	0.34409
	2.875	0.0006107	2.875	0.00144	2.875	-0.06717	2.875	0.34049
	2.87667	0.0006844	2.87667	0.00154	2.87667	-0.06723	2.87667	0.33693
	2.87833	0.0007651	2.87833	0.00161	2.87833	-0.06726	2.87833	0.33329
	2.88	0.0008443	2.88	0.00168	2.88	-0.06726	2.88	0.32955
	2.88167	0.0009303	2.88167	0.00175	2.88167	-0.06728	2.88167	0.32581
	2.88333	0.00103	2.88333	0.00183	2.88333	-0.06734	2.88333	0.32219
	2.885	0.00114	2.885	0.0019	2.885	-0.06737	2.885	0.31869
	2.88667	0.00124	2.88667	0.00199	2.88667	-0.06745	2.88667	0.31551
	2.88833	0.00133	2.88833	0.00207	2.88833	-0.06752	2.88833	0.31257
	2.89	0.00142	2.89	0.00214	2.89	-0.06756	2.89	0.30988
	2.89167	0.00151	2.89167	0.0022	2.89167	-0.06762	2.89167	0.30733
	2.89333	0.00159	2.89333	0.00225	2.89333	-0.06765	2.89333	0.30489
	2.895	0.00166	2.895	0.0023	2.895	-0.06763	2.895	0.30243
	2.89667	0.00174	2.89667	0.00236	2.89667	-0.06764	2.89667	0.29992
	2.89833	0.00181	2.89833	0.00242	2.89833	-0.06769	2.89833	0.29731
	2.9	0.00188	2.9	0.00248	2.9	-0.06769	2.9	0.29462
	2.90167	0.00196	2.90167	0.00255	2.90167	-0.06772	2.90167	0.29192
	2.90333	0.00204	2.90333	0.0026	2.90333	-0.06778	2.90333	0.28919
	2.905	0.00212	2.905	0.00265	2.905	-0.06782	2.905	0.28661
	2.90667	0.0022	2.90667	0.00268	2.90667	-0.06784	2.90667	0.28411
	2.90833	0.00227	2.90833	0.00272	2.90833	-0.06786	2.90833	0.28172
	2.91	0.00233	2.91	0.00276	2.91	-0.06791	2.91	0.27949
	2.91167	0.00239	2.91167	0.00278	2.91167	-0.06796	2.91167	0.27733
	2.91333	0.00244	2.91333	0.0028	2.91333	-0.06801	2.91333	0.27521
	2.915	0.00249	2.915	0.00282	2.915	-0.06805	2.915	0.27321
	2.91667	0.00255	2.91667	0.00283	2.91667	-0.06813	2.91667	0.27129
	2.91833	0.00259	2.91833	0.00285	2.91833	-0.06816	2.91833	0.26932
	2.92	0.00263	2.92	0.00287	2.92	-0.0682	2.92	0.26741
	2.92167	0.00267	2.92167	0.00289	2.92167	-0.06827	2.92167	0.26547
	2.92333	0.00271	2.92333	0.00293	2.92333	-0.06832	2.92333	0.26343
	2.925	0.00272	2.925	0.00297	2.925	-0.06834	2.925	0.2614
	2.92667	0.00275	2.92667	0.00301	2.92667	-0.0684	2.92667	0.25944
	2.92833	0.00278	2.92833	0.00304	2.92833	-0.06845	2.92833	0.2575
	2.93	0.0028	2.93	0.00307	2.93	-0.06846	2.93	0.25568
	2.93167	0.00282	2.93167	0.00308	2.93167	-0.06851	2.93167	0.25395
	2.93333	0.00286	2.93333	0.00308	2.93333	-0.06858	2.93333	0.25225
	2.935	0.00288	2.935	0.00308	2.935	-0.06863	2.935	0.25052
	2.93667	0.00291	2.93667	0.00308	2.93667	-0.06872	2.93667	0.24889
	2.93833	0.00293	2.93833	0.00307	2.93833	-0.06885	2.93833	0.24725
	2.94	0.00295	2.94	0.00306	2.94	-0.06897	2.94	0.24564
	2.94167	0.00296	2.94167	0.00306	2.94167	-0.06909	2.94167	0.24408
	2.94333	0.00298	2.94333	0.00305	2.94333	-0.06923	2.94333	0.24261
	2.945	0.00299	2.945	0.00305	2.945	-0.06936	2.945	0.24116
	2.94667	0.003	2.94667	0.00304	2.94667	-0.06948	2.94667	0.23972
	2.94833	0.003	2.94833	0.00302	2.94833	-0.06958	2.94833	0.23834
	2.95	0.003	2.95	0.00299	2.95	-0.06966	2.95	0.23684
	2.95167	0.00299	2.95167	0.00296	2.95167	-0.06966	2.95167	0.23534
	2.95333	0.00298	2.95333	0.00293	2.95333	-0.06962	2.95333	0.23374
	2.955	0.00296	2.955	0.00289	2.955	-0.06956	2.955	0.23218
	2.95667	0.00293	2.95667	0.00286	2.95667	-0.06946	2.95667	0.2306
	2.95833	0.00291	2.95833	0.00283	2.95833	-0.06933	2.95833	0.22926
	2.96	0.00288	2.96	0.0028	2.96	-0.06924	2.96	0.22786
	2.96167	0.00286	2.96167	0.00276	2.96167	-0.06909	2.96167	0.22658
	2.96333	0.00284	2.96333	0.00273	2.96333	-0.0689	2.96333	0.22529
	2.965	0.00281	2.965	0.0027	2.965	-0.06866	2.965	0.224
	2.96667	0.00278	2.96667	0.00267	2.96667	-0.06844	2.96667	0.22262
	2.96833	0.00274	2.96833	0.00264	2.96833	-0.06815	2.96833	0.22143
	2.97	0.00271	2.97	0.00261	2.97	-0.06783	2.97	0.22019
	2.97167	0.00269	2.97167	0.00257	2.97167	-0.06748	2.97167	0.21902
	2.97333	0.00266	2.97333	0.00253	2.97333	-0.06708	2.97333	0.21792
	2.975	0.00265	2.975	0.0025	2.975	-0.06651	2.975	0.21671
	2.97667	0.00263	2.97667	0.00247	2.97667	-0.06585	2.97667	0.21541
	2.97833	0.0026	2.97833	0.00244	2.97833	-0.06509	2.97833	0.21422
	2.98	0.00256	2.98	0.00242	2.98	-0.06423	2.98	0.21305
	2.98167	0.00254	2.98167	0.0024	2.98167	-0.06326	2.98167	0.21187
	2.98333	0.0025	2.98333	0.00239	2.98333	-0.06225	2.98333	0.21089
	2.985	0.00247	2.985	0.00237	2.985	-0.06113	2.985	0.2099
	2.98667	0.00245	2.98667	0.00234	2.98667	-0.05993	2.98667	0.20886
	2.98833	0.00242	2.98833	0.00231	2.98833	-0.05864	2.98833	0.2078
	2.99	0.00238	2.99	0.00227	2.99	-0.05724	2.99	0.20674
	2.99167	0.00233	2.99167	0.00223	2.99167	-0.05577	2.99167	0.20572
	2.99333	0.00229	2.99333	0.0022	2.99333	-0.05425	2.99333	0.20488
	2.995	0.00225	2.995	0.00216	2.995	-0.05266	2.995	0.20408
	2.99667	0.00222	2.99667	0.00213	2.99667	-0.05098	2.99667	0.20335
	2.99833	0.00218	2.99833	0.00211	2.99833	-0.04924	2.99833	0.20267
	3	0.00215	3	0.00208	3	-0.0474	3	0.20191
	3.00167	0.00212	3.00167	0.00203	3.00167	-0.0455	3.00167	0.20098
	3.00333	0.00209	3.00333	0.00199	3.00333	-0.04354	3.00333	0.2001
	3.005	0.00206	3.005	0.00195	3.005	-0.04158	3.005	0.19921
	3.00667	0.00205	3.00667	0.00191	3.00667	-0.0396	3.00667	0.19835
	3.00833	0.00203	3.00833	0.00188	3.00833	-0.03768	3.00833	0.19758
	3.01	0.002	3.01	0.00186	3.01	-0.0357	3.01	0.19697
	3.01167	0.00197	3.01167	0.00184	3.01167	-0.03374	3.01167	0.19635
	3.01333	0.00195	3.01333	0.00182	3.01333	-0.03177	3.01333	0.19586
	3.015	0.0019	3.015	0.00181	3.015	-0.02978	3.015	0.1954
	3.01667	0.00187	3.01667	0.00179	3.01667	-0.02782	3.01667	0.19492
	3.01833	0.00183	3.01833	0.00177	3.01833	-0.02591	3.01833	0.19446
	3.02	0.0018	3.02	0.00175	3.02	-0.02404	3.02	0.19397
	3.02167	0.00178	3.02167	0.00173	3.02167	-0.02217	3.02167	0.19342
	3.02333	0.00175	3.02333	0.0017	3.02333	-0.02034	3.02333	0.19285
	3.025	0.00172	3.025	0.00168	3.025	-0.01849	3.025	0.19237
	3.02667	0.00169	3.02667	0.00166	3.02667	-0.01666	3.02667	0.19187
	3.02833	0.00167	3.02833	0.00163	3.02833	-0.01482	3.02833	0.19149
	3.03	0.00164	3.03	0.0016	3.03	-0.01305	3.03	0.19113
	3.03167	0.00161	3.03167	0.00156	3.03167	-0.01131	3.03167	0.19079
	3.03333	0.00159	3.03333	0.00152	3.03333	-0.00962	3.03333	0.19041
	3.035	0.00156	3.035	0.00148	3.035	-0.00796	3.035	0.19006
	3.03667	0.00154	3.03667	0.00145	3.03667	-0.0064	3.03667	0.18966
	3.03833	0.00152	3.03833	0.00142	3.03833	-0.00484	3.03833	0.18939
	3.04	0.00151	3.04	0.00141	3.04	-0.00335	3.04	0.18924
	3.04167	0.00148	3.04167	0.00139	3.04167	-0.0019	3.04167	0.18917
	3.04333	0.00147	3.04333	0.00138	3.04333	-0.0005497	3.04333	0.18918
	3.045	0.00144	3.045	0.00136	3.045	0.000817	3.045	0.18927
	3.04667	0.00141	3.04667	0.00134	3.04667	0.00211	3.04667	0.1892
	3.04833	0.00138	3.04833	0.00131	3.04833	0.00344	3.04833	0.18905
	3.05	0.00136	3.05	0.00128	3.05	0.0048	3.05	0.18884
	3.05167	0.00133	3.05167	0.00126	3.05167	0.0063	3.05167	0.18854
	3.05333	0.00132	3.05333	0.00122	3.05333	0.00783	3.05333	0.18824
	3.055	0.0013	3.055	0.00119	3.055	0.00943	3.055	0.18805
	3.05667	0.0013	3.05667	0.00117	3.05667	0.01102	3.05667	0.18788
	3.05833	0.00128	3.05833	0.00115	3.05833	0.0126	3.05833	0.18779
	3.06	0.00126	3.06	0.00113	3.06	0.0141	3.06	0.18782
	3.06167	0.00124	3.06167	0.00112	3.06167	0.0156	3.06167	0.18788
	3.06333	0.00121	3.06333	0.0011	3.06333	0.01713	3.06333	0.18793
	3.065	0.00117	3.065	0.00108	3.065	0.01866	3.065	0.18795
	3.06667	0.00115	3.06667	0.00105	3.06667	0.02025	3.06667	0.18792
	3.06833	0.00113	3.06833	0.00102	3.06833	0.02189	3.06833	0.1877
	3.07	0.00111	3.07	0.0009822	3.07	0.02354	3.07	0.1874
	3.07167	0.00109	3.07167	0.0009475	3.07167	0.02521	3.07167	0.18705
	3.07333	0.00108	3.07333	0.000921	3.07333	0.02685	3.07333	0.18675
	3.075	0.00104	3.075	0.0008968	3.075	0.02845	3.075	0.18653
	3.07667	0.00101	3.07667	0.0008905	3.07667	0.02999	3.07667	0.18656
	3.07833	0.0009711	3.07833	0.0008833	3.07833	0.0314	3.07833	0.18665
	3.08	0.0009402	3.08	0.0008794	3.08	0.03266	3.08	0.18687
	3.08167	0.0009175	3.08167	0.0008743	3.08167	0.0339	3.08167	0.18702
	3.08333	0.000908	3.08333	0.0008748	3.08333	0.03496	3.08333	0.18706
	3.085	0.0008914	3.085	0.0008643	3.085	0.03595	3.085	0.18698
	3.08667	0.0008834	3.08667	0.0008487	3.08667	0.03693	3.08667	0.1869
	3.08833	0.0008688	3.08833	0.0008363	3.08833	0.03794	3.08833	0.18666
	3.09	0.000855	3.09	0.0008233	3.09	0.03881	3.09	0.1865
	3.09167	0.0008348	3.09167	0.0008021	3.09167	0.03968	3.09167	0.1864
	3.09333	0.0008228	3.09333	0.0007775	3.09333	0.04046	3.09333	0.18625
	3.095	0.0008061	3.095	0.0007578	3.095	0.04113	3.095	0.18598
	3.09667	0.0007864	3.09667	0.0007255	3.09667	0.04165	3.09667	0.18572
	3.09833	0.0007662	3.09833	0.0006918	3.09833	0.04213	3.09833	0.18529
	3.1	0.0007417	3.1	0.0006624	3.1	0.04255	3.1	0.18477
	3.10167	0.0007179	3.10167	0.0006376	3.10167	0.04294	3.10167	0.18424
	3.10333	0.0006942	3.10333	0.0006191	3.10333	0.04334	3.10333	0.18374
	3.105	0.0006857	3.105	0.0006233	3.105	0.04371	3.105	0.18328
	3.10667	0.0006789	3.10667	0.000628	3.10667	0.04408	3.10667	0.18284
	3.10833	0.0006805	3.10833	0.0006356	3.10833	0.04442	3.10833	0.18237
	3.11	0.0006714	3.11	0.0006419	3.11	0.04472	3.11	0.1818
	3.11167	0.0006625	3.11167	0.0006394	3.11167	0.04494	3.11167	0.18108
	3.11333	0.0006361	3.11333	0.0006208	3.11333	0.0451	3.11333	0.18019
	3.115	0.0006066	3.115	0.0006007	3.115	0.04525	3.115	0.17911
	3.11667	0.0005766	3.11667	0.0005825	3.11667	0.04537	3.11667	0.17798
	3.11833	0.0005555	3.11833	0.0005759	3.11833	0.04543	3.11833	0.17675
	3.12	0.0005419	3.12	0.0005705	3.12	0.04552	3.12	0.17556
	3.12167	0.000548	3.12167	0.0005676	3.12167	0.04562	3.12167	0.17426
	3.12333	0.0005572	3.12333	0.0005704	3.12333	0.04567	3.12333	0.17294
	3.125	0.0005658	3.125	0.0005675	3.125	0.04573	3.125	0.17148
	3.12667	0.0005743	3.12667	0.000556	3.12667	0.04582	3.12667	0.1699
	3.12833	0.0005766	3.12833	0.0005484	3.12833	0.04587	3.12833	0.16812
	3.13	0.0005637	3.13	0.0005553	3.13	0.04601	3.13	0.16625
	3.13167	0.0005472	3.13167	0.0005633	3.13167	0.04613	3.13167	0.16434
	3.13333	0.0005321	3.13333	0.0005703	3.13333	0.04619	3.13333	0.16227
	3.135	0.0005194	3.135	0.0005747	3.135	0.04623	3.135	0.16014
	3.13667	0.0005071	3.13667	0.0005792	3.13667	0.04631	3.13667	0.15794
	3.13833	0.0005003	3.13833	0.0005654	3.13833	0.04633	3.13833	0.15572
	3.14	0.0004965	3.14	0.0005394	3.14	0.04645	3.14	0.15341
	3.14167	0.0005022	3.14167	0.0005186	3.14167	0.04666	3.14167	0.15113
	3.14333	0.0005048	3.14333	0.0004933	3.14333	0.04698	3.14333	0.14877
	3.145	0.0005083	3.145	0.0004669	3.145	0.04737	3.145	0.14642
	3.14667	0.0005211	3.14667	0.0004395	3.14667	0.04782	3.14667	0.14406
	3.14833	0.0005305	3.14833	0.00042	3.14833	0.04829	3.14833	0.14167
	3.15	0.0005182	3.15	0.0003961	3.15	0.04882	3.15	0.13927
	3.15167	0.0005073	3.15167	0.0003776	3.15167	0.04934	3.15167	0.13694
	3.15333	0.0005014	3.15333	0.000346	3.15333	0.04985	3.15333	0.13464
	3.155	0.0004844	3.155	0.0003104	3.155	0.05037	3.155	0.13237
	3.15667	0.000477	3.15667	0.0002718	3.15667	0.05092	3.15667	0.13014
	3.15833	0.0004872	3.15833	0.0002136	3.15833	0.05151	3.15833	0.12806
	3.16	0.0004883	3.16	0.0001552	3.16	0.05212	3.16	0.1261
	3.16167	0.0004841	3.16167	0.0001006	3.16167	0.05272	3.16167	0.1242
	3.16333	0.0004786	3.16333	4.91e-05	3.16333	0.05339	3.16333	0.12237
	3.165	0.0004519	3.165	-2.04e-05	3.165	0.054	3.165	0.12069
	3.16667	0.0004122	3.16667	-7.44e-05	3.16667	0.05454	3.16667	0.11901
	3.16833	0.0003819	3.16833	-0.0001432	3.16833	0.05503	3.16833	0.11731
	3.17	0.0003376	3.17	-0.0002157	3.17	0.05555	3.17	0.11572
	3.17167	0.0002898	3.17167	-0.0002875	3.17167	0.05605	3.17167	0.11424
	3.17333	0.0002585	3.17333	-0.0003473	3.17333	0.05661	3.17333	0.11272
	3.175	0.0002249	3.175	-0.0004103	3.175	0.05721	3.175	0.11127
	3.17667	0.0001701	3.17667	-0.0004713	3.17667	0.05782	3.17667	0.11
	3.17833	0.0001201	3.17833	-0.0005341	3.17833	0.05842	3.17833	0.10879
	3.18	6.49e-05	3.18	-0.0006052	3.18	0.05903	3.18	0.10764
	3.18167	-1.44e-05	3.18167	-0.0006816	3.18167	0.0596	3.18167	0.10659
	3.18333	-9.69e-05	3.18333	-0.0007528	3.18333	0.06016	3.18333	0.10565
	3.185	-0.000176	3.185	-0.0008167	3.185	0.06074	3.185	0.10476
	3.18667	-0.0002578	3.18667	-0.0008775	3.18667	0.06131	3.18667	0.1039
	3.18833	-0.0003491	3.18833	-0.0009307	3.18833	0.06183	3.18833	0.10309
	3.19	-0.0004238	3.19	-0.000976	3.19	0.06238	3.19	0.1024
	3.19167	-0.0005005	3.19167	-0.00103	3.19167	0.06297	3.19167	0.1018
	3.19333	-0.000564	3.19333	-0.00109	3.19333	0.06356	3.19333	0.10119
	3.195	-0.0006221	3.195	-0.00113	3.195	0.06415	3.195	0.10065
	3.19667	-0.0006681	3.19667	-0.00117	3.19667	0.06486	3.19667	0.10025
	3.19833	-0.0007243	3.19833	-0.00119	3.19833	0.0656	3.19833	0.09996
	3.2	-0.0007818	3.2	-0.00118	3.2	0.06631	3.2	0.09971
	3.20167	-0.0008493	3.20167	-0.00116	3.20167	0.06708	3.20167	0.09964
	3.20333	-0.0009211	3.20333	-0.00114	3.20333	0.06793	3.20333	0.0997
	3.205	-0.0009876	3.205	-0.00112	3.205	0.06873	3.205	0.09979
	3.20667	-0.00104	3.20667	-0.00109	3.20667	0.06955	3.20667	0.09982
	3.20833	-0.00107	3.20833	-0.00107	3.20833	0.07041	3.20833	0.0999
	3.21	-0.0011	3.21	-0.00104	3.21	0.07135	3.21	0.10005
	3.21167	-0.00112	3.21167	-0.00101	3.21167	0.07231	3.21167	0.10025
	3.21333	-0.00114	3.21333	-0.0009848	3.21333	0.07333	3.21333	0.10052
	3.215	-0.00116	3.215	-0.0009681	3.215	0.0744	3.215	0.10089
	3.21667	-0.00118	3.21667	-0.0009444	3.21667	0.0755	3.21667	0.10142
	3.21833	-0.00118	3.21833	-0.0009172	3.21833	0.07661	3.21833	0.10188
	3.22	-0.00117	3.22	-0.000887	3.22	0.07771	3.22	0.10239
	3.22167	-0.00115	3.22167	-0.0008574	3.22167	0.07876	3.22167	0.10294
	3.22333	-0.00113	3.22333	-0.0008088	3.22333	0.0798	3.22333	0.10356
	3.225	-0.0011	3.225	-0.0007643	3.225	0.08084	3.225	0.10413
	3.22667	-0.00109	3.22667	-0.0007184	3.22667	0.08183	3.22667	0.10482
	3.22833	-0.00107	3.22833	-0.000679	3.22833	0.08278	3.22833	0.10543
	3.23	-0.00104	3.23	-0.0006273	3.23	0.0838	3.23	0.10605
	3.23167	-0.00102	3.23167	-0.0005886	3.23167	0.08478	3.23167	0.10662
	3.23333	-0.0009872	3.23333	-0.0005415	3.23333	0.08568	3.23333	0.10719
	3.235	-0.0009431	3.235	-0.0004964	3.235	0.08651	3.235	0.10773
	3.23667	-0.0008928	3.23667	-0.0004396	3.23667	0.0873	3.23667	0.10836
	3.23833	-0.0008382	3.23833	-0.0003957	3.23833	0.08803	3.23833	0.10901
	3.24	-0.0007812	3.24	-0.0003394	3.24	0.08863	3.24	0.10976
	3.24167	-0.0007347	3.24167	-0.0002853	3.24167	0.08919	3.24167	0.11054
	3.24333	-0.0006991	3.24333	-0.0002223	3.24333	0.08969	3.24333	0.11134
	3.245	-0.0006778	3.245	-0.0001647	3.245	0.09012	3.245	0.11215
	3.24667	-0.0006531	3.24667	-9.15e-05	3.24667	0.09035	3.24667	0.11295
	3.24833	-0.0006206	3.24833	-2.85e-05	3.24833	0.09056	3.24833	0.11369
	3.25	-0.0005826	3.25	3.09e-05	3.25	0.09074	3.25	0.11443
	3.25167	-0.00054	3.25167	7.44e-05	3.25167	0.09087	3.25167	0.11525
	3.25333	-0.0004928	3.25333	0.0001152	3.25333	0.09097	3.25333	0.11601
	3.255	-0.000443	3.255	0.0001404	3.255	0.09107	3.255	0.11685
	3.25667	-0.0004079	3.25667	0.0001743	3.25667	0.0911	3.25667	0.11769
	3.25833	-0.0003703	3.25833	0.0002001	3.25833	0.09105	3.25833	0.11851
	3.26	-0.0003281	3.26	0.0002397	3.26	0.09094	3.26	0.11927
	3.26167	-0.000273	3.26167	0.0002761	3.26167	0.09072	3.26167	0.12011
	3.26333	-0.0002355	3.26333	0.0003202	3.26333	0.09047	3.26333	0.12085
	3.265	-0.0001853	3.265	0.0003517	3.265	0.09017	3.265	0.1216
	3.26667	-0.0001351	3.26667	0.0004023	3.26667	0.08976	3.26667	0.12239
	3.26833	-8.58e-05	3.26833	0.0004478	3.26833	0.08925	3.26833	0.12322
	3.27	-4.17e-05	3.27	0.0004977	3.27	0.08872	3.27	0.12399
	3.27167	3.09e-05	3.27167	0.0005432	3.27167	0.08813	3.27167	0.12479
	3.27333	8.73e-05	3.27333	0.0005849	3.27333	0.08753	3.27333	0.12562
	3.275	0.0001415	3.275	0.0006163	3.275	0.08694	3.275	0.12645
	3.27667	0.0001928	3.27667	0.0006411	3.27667	0.08635	3.27667	0.12726
	3.27833	0.0002377	3.27833	0.000666	3.27833	0.08569	3.27833	0.12807
	3.28	0.0002528	3.28	0.0006912	3.28	0.08493	3.28	0.1289
	3.28167	0.0002861	3.28167	0.0007274	3.28167	0.08408	3.28167	0.12971
	3.28333	0.0003171	3.28333	0.0007563	3.28333	0.0832	3.28333	0.13045
	3.285	0.0003507	3.285	0.0007989	3.285	0.08225	3.285	0.13118
	3.28667	0.0003873	3.28667	0.0008336	3.28667	0.08138	3.28667	0.13198
	3.28833	0.0004427	3.28833	0.000867	3.28833	0.08055	3.28833	0.13277
	3.29	0.0004889	3.29	0.0009051	3.29	0.07971	3.29	0.13361
	3.29167	0.0005405	3.29167	0.000947	3.29167	0.07882	3.29167	0.13451
	3.29333	0.0005902	3.29333	0.0009718	3.29333	0.07797	3.29333	0.13544
	3.295	0.0006374	3.295	0.001	3.295	0.07704	3.295	0.1363
	3.29667	0.0006764	3.29667	0.00103	3.29667	0.07604	3.29667	0.13717
	3.29833	0.0007048	3.29833	0.00105	3.29833	0.07502	3.29833	0.138
	3.3	0.0007196	3.3	0.00107	3.3	0.07403	3.3	0.13882
	3.30167	0.0007264	3.30167	0.00109	3.30167	0.07302	3.30167	0.13971
	3.30333	0.000738	3.30333	0.00111	3.30333	0.07199	3.30333	0.14061
	3.305	0.0007464	3.305	0.00114	3.305	0.07106	3.305	0.14146
	3.30667	0.0007648	3.30667	0.00116	3.30667	0.07017	3.30667	0.14235
	3.30833	0.0007921	3.30833	0.00118	3.30833	0.06928	3.30833	0.14327
	3.31	0.0008189	3.31	0.00119	3.31	0.0684	3.31	0.14409
	3.31167	0.0008361	3.31167	0.00119	3.31167	0.06757	3.31167	0.14491
	3.31333	0.0008572	3.31333	0.00119	3.31333	0.06672	3.31333	0.14582
	3.315	0.0008781	3.315	0.00119	3.315	0.06589	3.315	0.14674
	3.31667	0.0009098	3.31667	0.00121	3.31667	0.06511	3.31667	0.14761
	3.31833	0.0009525	3.31833	0.00122	3.31833	0.06437	3.31833	0.14855
	3.32	0.0009982	3.32	0.00125	3.32	0.06368	3.32	0.14949
	3.32167	0.00105	3.32167	0.00128	3.32167	0.06302	3.32167	0.1504
	3.32333	0.0011	3.32333	0.00131	3.32333	0.06245	3.32333	0.15134
	3.325	0.00112	3.325	0.00133	3.325	0.06189	3.325	0.15231
	3.32667	0.00113	3.32667	0.00134	3.32667	0.06138	3.32667	0.15331
	3.32833	0.00114	3.32833	0.00135	3.32833	0.06091	3.32833	0.15435
[truncated: 13,003 more rows]
