# Supplementary material for: In vitro inhibitory effect of five natural sweeteners on α-glucosidase and α-amylase
Source: Royal Society of Chemistry journal article supplement (doi:10.1039/d3fo05234f), 2024-01-01
Supplement: d3fo05234f1.zip [file 3.2Effect of sweeteners on the activity of -glucosidase and -amylase.xlsx]

## Sheet:  α-glucosidase-acarbose
acarbose/µg/mL	sample	sample blank			control	blank
0.976562	0.1114	0.1329			0.2399	0.0445
	0.1117				0.234
	0.172				0.2281
1.95325	0.13	0.0479
	0.1318
	0.1272
3.90625	0.1443	0.0478
	0.1494
	0.1485
7.8125	0.1784	0.0461
	0.1728
	0.1714
15.625	0.1901	0.048
	0.1865
	0.187
31.25	0.2062	0.04615
	0.2077
	0.2042

## Sheet: α-glucosidase-GA
GA/mg/ml	sample	sample blank			control	blank
0.25	0.0789	0.0492			0.2809	0.04505
	0.079				0.2727
	0.0777				0.2722
0.5	0.0971	0.0503
	0.0922
	0.0929
1	0.126	0.04685
	0.1221
	0.1238
2	0.1564	0.05175
	0.1579
	0.1621
4	0.1933	0.0498
	0.1927
	0.196
8	0.2171	0.04975
	0.2172
	0.215

## Sheet: α-glucosidase-CT
CT/µg/mL	sample	sample blank			control	blank
0.9765	0.1697	0.1329			0.2523	0.0460333
	0.1725				0.2514
	0.172				0.2475
1.95325	0.0848	0.0437
	0.0854
	0.0848
3.90625	0.1327	0.0664
	0.1331
	0.1347
7.8125	0.1525	0.0563
	0.1509
	0.1517
15.625	0.1713	0.05045
	0.169
	0.1693
31.25	0.2013	0.04655
	0.2029
	0.2021

## Sheet: α-glucosidase-Ste
GA/mg/ml	sample	sample blank			control	blank
128	0.269	0.199867			0.3076	0.0453
	0.2664				0.3132
	0.2728				0.3087
					0.3025
96	0.25	0.167933
	0.2578
	0.2518
64	0.2601	0.1346
	0.2586
	0.2599
48	0.2664	0.117467
	0.2664
	0.2671
32	0.2823	0.0975333
	0.2849
	0.2876
24	0.2981	0.0823667
	0.3004
	0.3027

## Sheet: α-amylase-acarbose
	acarbose/μg/ml	sample	sample blank		control	blank
	14.881	0.8677	0.91035		0.9129	0.116367
		0.8661			0.9128
		0.8722			0.9174
	7.44048	0.8192	0.9351
		0.8277
		0.8286
	3.72024	0.738	0.9246
		0.7399
		0.7354
	1.86012	0.6067	0.9223
		0.6063
		0.6157
	0.93006	0.4594	0.94265
		0.456
		0.459
	0.46503	0.253	0.93385
		0.2456
		0.2637

## Sheet: α-amylase-Ste
Ste/mg/ml	sample	sample blank		control	blank
121.905	0.0538	0.09155		0.9194	0.21775
	0.0559			0.91845
	0.0551			0.9175
60.9524	0.0585	0.2388
	0.059
	0.0613
30.4762	0.0898	0.3747
	0.0903
	0.0937
15.2381	0.117	0.5287
	0.1166
	0.1165
7.61905	0.1507	0.6766
	0.1488
	0.1501
3.80952	0.1854	0.7307
	0.1785
	0.1806

## Sheet: α-amylase-Mog
Mog/mg/ml	sample	sample blank		control	blank
121.905	0.2086	0.2442		0.8897	0.338167
	0.206			0.8921
	0.2021			0.8897
60.9524	0.2182	0.3487
	0.2206
	0.2233
30.4762	0.1862	0.5422
	0.1861
	0.1853
15.2381	0.1833	0.6794
	0.1814
	0.1861
7.61905	0.1992	0.74085
	0.1995
	0.1984

## Sheet: α-amylase-CR
CR/mg/ml	sample	sample blank		control	blank
1.90476	0.7013	0.814333		0.4483	0.856333
	0.698			0.4475
	0.7066			0.4341
				0.4271
0.952381	0.6313	0.775533
	0.6282
	0.6278
0.47619	0.5632	0.801233
	0.5708
	0.5707
0.238095	0.5416	0.800933
	0.5486
	0.5267
0.119048	0.5206	0.7985
	0.5142
	0.5243
0.0595238	0.5065	0.8
	0.5122
	0.5003

## Sheet: α-amylase-CT
CTmg/ml	sample	sample blank		control	blank
0.714286	0.5327	0.588625		0.6353	0.9185
	0.5342			0.6266
	0.5424			0.6294
0.595238	0.552	0.630267
	0.5548
	0.5541
0.47619	0.5992	0.702725
	0.5863
	0.5876
0.357143	0.6263	0.7399
	0.6224
	0.6133
0.238095	0.6493	0.7903
	0.6415
	0.6452
0.119048	0.643	0.832125
	0.6584
	0.6597
