# Supplementary material for: In vitro inhibitory effect of five natural sweeteners on α-glucosidase and α-amylase
Source: Royal Society of Chemistry journal article supplement (doi:10.1039/d3fo05234f), 2024-01-01
Supplement: d3fo05234f1.zip [file Determining the type of inhibition exhibited by the sweeteners against -amylase.xlsx]

## Sheet: CR
starch/mg/ml	α-amylase+pbs	α-amylase+starch		α-amylase+pbs+0.12mg/ml CR	α-amylase+starch+0.12mg/ml CR		α-amylase+pbs+0.48mg/ml CR	α-amylase+starch+0.48mg/ml CR
0.03	0.7116	1.2738		0.149	0.448967		0.2838	0.49645
	0.7166			0.1527			0.2692
	0.7112			0.1515			0.2866
				0.2659	0.603975		0.4107	0.64795
0.06	0.5417	1.04582		0.2801			0.3979
	0.5342			0.2615			0.4035
	0.5358
				0.453	0.818275		0.566	0.8566
0.09	0.3509	0.900625		0.4203			0.571
	0.3519			0.4357			0.5644
	0.3593
				0.5812	1.00345		0.639	1.00093
0.11	0.1926	0.637925		0.6033			0.6366
	0.1905			0.5689			0.6585
	0.187
				0.7588	1.19883		0.8234	1.15135
				0.7175			0.8565
0.14	0.1009	0.47045		0.7503			0.7915
	0.1102
	0.0961

## Sheet: Mog
	starch/mg/ml	α-amylase+pbs	α-amylase+starch		α-amylase+pbs+30.48mg/ml Mog	α-amylase+starch+30.48mg/ml Mog		α-amylase+pbs+60.95mg/ml Mog	α-amylase+starch+60.95mg/ml Mog
	0.03	0.7116	1.2738		0.478	0.6799		0.1447	0.2076
		0.7166			0.475			0.1474
		0.7112			0.4696			0.1477
					0.3648	0.574775		0.1847	0.259767
	0.06	0.5417	1.04582		0.3817			0.185
		0.5342			0.3806			0.1755
		0.5358
					0.2905	0.49625		0.2624	0.35145
	0.09	0.3509	0.900625		0.3569			0.2711
		0.3519			0.3185			0.2725
		0.3593
					0.2186	0.377325		0.3093	0.420233
	0.11	0.1926	0.637925		0.2075			0.3133
		0.1905			0.213237			0.3121
		0.187
					0.1423	0.26035		0.3519	0.4132
	0.14	0.1009	0.47045		0.1589			0.3635
		0.1102			0.1565			0.3495
		0.0961

## Sheet: CT
starch/mg/ml	α-amylase+pbs	α-amylase+starch		α-amylase+pbs+0.12mg/ml CT	α-amylase+starch+0.12mg/ml CT		α-amylase+pbs+0.36mg/ml CT	α-amylase+starch+0.16mg/ml CT
0.03	0.7116	1.2738		0.1442	0.4508		0.2454	0.409756
	0.7166			0.1462			0.2424
	0.7112			0.1476			0.2431
0.06	0.5417	1.04582		0.2417	0.610825		0.3735	0.5603
	0.5342			0.2437			0.374
	0.5358			0.2393			0.3427
0.09	0.3509	0.900625		0.3885	0.790775		0.5366	0.77065
	0.3519			0.3829			0.5327
	0.3593			0.3941			0.5289
0.11	0.1926	0.637925		0.5051	0.984725		0.653	0.918325
	0.1905			0.5148			0.6443
	0.187			0.5046			0.6536
0.14	0.1009	0.47045		0.6475	1.15015		0.7968	1.09945
	0.1102			0.6671			0.7932
	0.0961			0.6358			0.7824

## Sheet: Ste
	starch/mg/ml	α-amylase+pbs	α-amylase+starch		α-amylase+pbs+7.62mg/ml Ste	α-amylase+starch+7.62mg/ml Ste		α-amylase+pbs+15.24mg/ml Ste	α-amylase+starch+15.24mg/ml Ste
	0.03	0.7116	1.2738		0.0879	0.348133		0.0777	0.262525
		0.7166			0.0879			0.0761
		0.7112			0.0888			0.0771
	0.06	0.5417	1.04582		0.1286	0.4747		0.1087	0.351875
		0.5342			0.1284			0.1067
		0.5358			0.1309			0.1037
	0.09	0.3509	0.900625		0.2156	0.644133		0.163	0.4696
		0.3519			0.2244			0.1617
		0.3593			0.2185			0.147
	0.11	0.1926	0.637925		0.3145	0.7536		0.2073	0.547267
		0.1905			0.3159			0.1977
		0.187			0.3154			0.1957
	0.14	0.1009	0.47045		0.4152	0.884967		0.2553	0.636867
		0.1102			0.4111			0.2526
		0.0961			0.3755			0.2662
