# Supplementary material for: In vitro inhibitory effect of five natural sweeteners on α-glucosidase and α-amylase
Source: Royal Society of Chemistry journal article supplement (doi:10.1039/d3fo05234f), 2024-01-01
Supplement: d3fo05234f1.zip [file Determining the type of inhibition exhibited by the sweeteners against -glucosidase.xlsx]

## Sheet: CT
	PNPG/mM	α-glucosidase+PNPG	α-glucosidase+PBS		α-glucosidase+PNPG+1.95µg/ml CT	α-glucosidase+PBS+1.95µg/ml CT		α-glucosidase+PNPG+3.9µg/ml CT	α-glucosidase+PBS+3.9µg/ml CT
	0.75	0.25	0.07655		0.1949	0.08185		0.1893	0.09025
		0.2476			0.2047			0.1846
		0.249			0.2024			0.186891
	0.63	0.2685	0.10155		0.2047	0.10555		0.1931	0.11305
		0.26366			0.2038			0.1932
		0.2591			0.20425			0.193
	0.5	0.2339	0.08335		0.1851	0.0894		0.1692	0.09325
		0.237			0.1855			0.168239
		0.2309			0.1853			0.1673
	0.38	0.233	0.0919		0.17895	0.09525		0.161124	0.1007
		0.2344			0.1787			0.1624
		0.2337			0.1792			0.1599
	0.25	0.1891	0.0709		0.1381	0.0751		0.12755	0.07895
		0.1877			0.138			0.1276
		0.1884			0.1379			0.1275

## Sheet: GA
PNPG/mM	α-glucosidase+PNPG	α-glucosidase+PBS		α-glucosidase+PNPG+0.5mg/ml GA	α-glucosidase+PBS+0.5mg/ml GA		α-glucosidase+PNPG+1mg/ml GA	α-glucosidase+PBS+1mg/ml GA
0.75	0.25	0.07655		0.1614	0.05335		0.1403	0.05415
	0.2476			0.1631			0.13878
	0.249			0.1533			0.137296
0.63	0.2685	0.10155		0.1396	0.05335		0.1142	0.05105
	0.26366			0.1371			0.1124
	0.2591			0.1432			0.113287
0.5	0.2339	0.08335		0.133	0.0484		0.1093	0.04845
	0.237			0.1325			0.1105
	0.2309			0.1335			0.1099
0.38	0.233	0.0919		0.1172	0.05165		0.0982	0.04715
	0.2344			0.1149			0.0965
	0.2337			0.1175			0.0985
0.25	0.1891	0.0709		0.0979	0.04515		0.0818	0.04715
	0.1877			0.0968			0.0817
	0.1884			0.0973442			0.08175

## Sheet: Ste
PNPG/mM	α-glucosidase+PNPG	α-glucosidase+PBS		α-glucosidase+PNPG+64mg/ml Ste	α-glucosidase+PBS+64mg/ml Ste		α-glucosidase+PNPG+128mg/ml Ste	α-glucosidase+PBS+128mg/ml Ste
0.75	0.25	0.07655		0.22	0.08425		0.2246	0.1076
	0.2476			0.219549			0.2231
	0.249			0.2191			0.22384
0.63	0.2685	0.10155		0.2108	0.0866		0.2194	0.1101
	0.26366			0.2084			0.2153
	0.2591			0.209589			0.21731
0.5	0.2339	0.08335		0.1981	0.08425		0.2014	0.10615
	0.237			0.1991			0.1972
	0.2309			0.1986			0.19925
0.38	0.233	0.0919		0.1948	0.07845		0.191034	0.1108
	0.2344			0.1898			0.1922
	0.2337			0.1854			0.1899
0.25	0.1891	0.0709		0.167	0.07705		0.16865	0.10525
	0.1877			0.167999			0.1688
	0.1884			0.165			0.1685
