# Supplementary material for: In vitro inhibitory effect of five natural sweeteners on α-glucosidase and α-amylase
Source: Royal Society of Chemistry journal article supplement (doi:10.1039/d3fo05234f), 2024-01-01
Supplement: d3fo05234f1.zip [file Effect of sweeteners on the three-dimensional fluorescence spectra of -glucosidase and -amylase.xlsx]

## Sheet: α-glucosidase
		200	205	210	215	220	225	230	235	240	245	250	255	260	265	270	275	280	285	290	295	300	305	310	315	320	325	330	335	340	345	350	355	360	365	370	375	380	385	390	395	400	405	410	415	420	425	430	435
	200	0.488	1.031	1.069	1.533	1.431	0.617	1.01	1.184	0.468	0.446	0.42	0.576	0.562	1.004	0.962	1.239	1.307	1.143	0.897	0.6	0.329	0.217	0.199	0.14	0.138	0.152	0.092	0.085	0.114	0.056	0.094	0.094	0.074	0.08	0.073	0.069	0.055	0.042	0.051	0.06	0.043	0.055	0.039	0.046	0.039	0.026	0.032	0.005
	205	2.863	6.99	7.687	7.56	3.541	1.339	1.362	0.694	0.411	0.415	0.524	0.537	0.562	0.734	1.253	1.288	1.329	1.161	0.91	0.562	0.322	0.284	0.144	0.132	0.125	0.109	0.1	0.105	0.077	0.073	0.082	0.111	0.083	0.083	0.06	0.068	0.038	0.069	0.061	0.04	0.031	0.046	0.047	0.069	0.059	0.055	0.036	0.032
	210	3.865	17.05	25.89	31.16	16.31	4.411	1.278	1.163	0.817	0.402	0.561	0.506	0.677	0.879	1.279	1.453	1.42	1.257	0.884	0.692	0.326	0.212	0.182	0.124	0.128	0.056	0.12	0.064	0.102	0.069	0.09	0.067	0.067	0.072	0.07	0.081	0.037	0.059	0.044	0.047	0.037	0.049	0.074	0.069	0.119	0.127	0.124	0.074
	215	1.994	10.39	41.11	68.83	52.7	26.38	6.236	0.928	0.76	0.524	0.329	0.503	0.687	0.936	1.355	1.654	1.291	1.329	0.886	0.665	0.339	0.205	0.163	0.092	0.12	0.083	0.128	0.092	0.09	0.063	0.081	0.062	0.064	0.105	0.054	0.066	0.024	0.06	0.046	0.044	0.031	0.036	0.055	0.063	0.131	0.194	0.194	0.199
	220	1.165	4.796	31.53	85.84	123	93.68	38.5	7.485	0.974	0.52	0.571	0.732	0.622	0.768	1.271	1.428	1.478	1.231	1.088	0.792	0.339	0.266	0.11	0.12	0.099	0.065	0.114	0.096	0.104	0.099	0.076	0.082	0.089	0.053	0.074	0.077	0.051	0.081	0.047	0.062	0.035	0.035	0.045	0.045	0.099	0.116	0.201	0.321
	225	-0.175	2.072	12.62	60.21	153.1	193.6	156	58.77	10.92	0.986	0.813	0.52	0.994	0.923	1.484	1.634	1.626	1.284	0.999	0.775	0.39	0.255	0.138	0.137	0.133	0.125	0.099	0.086	0.077	0.082	0.101	0.094	0.108	0.054	0.052	0.076	0.049	0.058	0.048	0.032	0.04	0.033	0.034	0.059	0.037	0.064	0.098	0.204
	230	0.718	2.776	3.965	24.33	95.66	252.1	342.4	262.9	104.7	15.26	1.049	0.822	1.055	1.191	1.282	1.645	1.434	1.229	0.938	0.654	0.431	0.269	0.176	0.134	0.108	0.114	0.15	0.126	0.115	0.097	0.098	0.084	0.061	0.069	0.077	0.07	0.063	0.058	0.047	0.055	0.032	0.032	0.036	0.034	0.034	0.038	0.052	0.068
	235	-1.209	1.343	4.521	12.35	34.03	167.8	443.7	593.7	444.2	166.6	19.95	1.027	1.14	1.338	1.458	1.713	1.65	1.407	1.055	0.739	0.414	0.28	0.197	0.185	0.117	0.123	0.1	0.159	0.099	0.112	0.111	0.083	0.088	0.096	0.073	0.059	0.035	0.065	0.052	0.041	0.039	0.044	0.029	0.022	0.044	0.042	0.058	0.049
	240	-0.905	1.025	2.811	7.452	19.75	54.81	277.2	671.1	877.4	606.5	183.7	17.77	1.288	1.619	1.356	1.805	1.732	1.787	1.127	0.696	0.491	0.262	0.207	0.186	0.12	0.121	0.113	0.103	0.116	0.12	0.12	0.076	0.104	0.071	0.058	0.073	0.076	0.067	0.06	0.049	0.036	0.045	0.039	0.033	0.032	0.036	0.047	0.048
	245	-0.055	-0.485	0.966	4.769	16.66	30.79	78.32	371.5	870.8	1126	676.9	184.1	15.54	1.865	1.885	1.769	1.943	1.683	1.251	0.619	0.485	0.335	0.154	0.168	0.145	0.131	0.17	0.137	0.087	0.086	0.077	0.073	0.113	0.054	0.083	0.08	0.075	0.063	0.037	0.065	0.036	0.037	0.031	0.034	0.032	0.029	0.042	0.034
	250	-0.537	0.473	1.358	3.439	7.773	23.23	36.76	85.37	412.3	1045	1229	734.7	180.5	14.32	2.162	2.138	2.102	1.811	1.088	0.949	0.523	0.366	0.212	0.181	0.157	0.223	0.146	0.129	0.101	0.082	0.089	0.084	0.124	0.084	0.103	0.085	0.073	0.062	0.063	0.077	0.055	0.045	0.046	0.017	0.022	0.039	0.042	0.036
	255	0.608	1.315	0.693	2.064	4.598	11.43	33.13	43.18	86.84	450.3	1089	1370	754	177.1	12.82	2.283	2.263	1.902	1.615	0.963	0.562	0.409	0.259	0.205	0.17	0.166	0.132	0.15	0.151	0.108	0.146	0.122	0.089	0.115	0.111	0.07	0.079	0.077	0.056	0.071	0.053	0.05	0.059	0.029	0.041	0.029	0.037	0.026
	260	1.229	1.491	3.367	3.457	3.581	5.225	17.44	43.07	50.37	83.75	445.8	1225	1487	839	178	12.65	2.644	2.214	1.517	1.15	0.653	0.385	0.272	0.234	0.178	0.196	0.172	0.129	0.133	0.101	0.149	0.099	0.093	0.081	0.086	0.072	0.083	0.071	0.045	0.052	0.054	0.055	0.032	0.046	0.043	0.031	0.026	0.03
	265	2.12	2.343	7.493	6.588	5.082	4.965	6.015	22.31	53.35	54	80.44	482.1	1321	1719	925.6	184.7	13.63	2.745	1.893	1.354	0.887	0.501	0.263	0.243	0.176	0.2	0.156	0.168	0.132	0.125	0.125	0.125	0.092	0.124	0.106	0.056	0.073	0.09	0.048	0.072	0.052	0.053	0.05	0.047	0.04	0.033	0.041	0.049
	270	4.379	10.03	11.85	16.29	14.9	8.698	5.253	7.023	31.49	64.34	57.1	81.76	497.5	1520	1949	1034	184.6	13.51	2.243	1.451	0.875	0.624	0.361	0.312	0.299	0.255	0.211	0.186	0.145	0.162	0.17	0.142	0.139	0.081	0.108	0.097	0.107	0.068	0.061	0.075	0.079	0.084	0.061	0.068	0.056	0.062	0.095	0.073
	275	4.744	14.4	26.33	31.81	27.46	17.08	10.42	6.515	11.77	42.99	76.26	63.67	83.56	562.5	1702	2149	1108	187.6	12.03	1.942	0.964	0.668	0.468	0.365	0.244	0.263	0.211	0.197	0.152	0.181	0.168	0.16	0.171	0.124	0.123	0.095	0.097	0.087	0.089	0.093	0.067	0.065	0.062	0.077	0.101	0.097	0.133	0.097
	280	9.702	20.09	43.39	56.74	59.8	47.28	33.38	20.41	12.04	19.67	65.18	93.19	72.06	103.4	648.9	1882	2329	1156	174	10.71	1.584	0.932	0.643	0.451	0.377	0.247	0.22	0.244	0.195	0.206	0.166	0.164	0.128	0.143	0.114	0.105	0.098	0.082	0.077	0.085	0.084	0.084	0.075	0.128	0.141	0.121	0.147	0.135
	285	19.01	31.74	78.99	110.3	135.9	137.4	105.2	69.63	34.8	26.21	46.29	103.3	143.1	132.1	189.5	773.5	2078	2415	1120	174.9	10.7	1.395	0.819	0.585	0.422	0.366	0.296	0.272	0.239	0.222	0.177	0.133	0.15	0.174	0.126	0.121	0.095	0.094	0.11	0.075	0.071	0.105	0.121	0.142	0.197	0.223	0.251	0.237
	290	28.99	67.39	141	219.6	283.4	319.5	286	191.4	95.18	59.39	69.74	126.5	231	297.8	333.7	398.7	984.7	2191	2378	1200	164.4	9.771	1.124	0.777	0.518	0.42	0.338	0.298	0.223	0.189	0.176	0.197	0.194	0.147	0.178	0.165	0.138	0.081	0.116	0.086	0.112	0.133	0.207	0.24	0.303	0.377	0.453	0.532
	295	47.62	125.2	235.8	391.3	563.3	665.4	613.8	406.8	211.4	127.2	147.3	217.5	362.4	555.1	692.7	726.4	723.1	1164	2203	2565	1070	160.8	8.965	1.201	0.784	0.598	0.433	0.365	0.266	0.296	0.219	0.215	0.235	0.223	0.151	0.165	0.142	0.107	0.129	0.124	0.142	0.155	0.276	0.353	0.502	0.674	0.729	0.985
	300	81.45	182.6	403.1	669.6	956.6	1174	1085	747.7	398.9	241.6	265.1	393.7	594.1	891.7	1191	1325	1235	1007	1231	2329	2207	1022	150.5	8.153	1.128	0.687	0.584	0.496	0.35	0.316	0.273	0.29	0.245	0.198	0.204	0.216	0.157	0.153	0.132	0.17	0.196	0.293	0.38	0.566	0.769	1.057	1.251	1.53
	305	108.1	271.3	580.3	959.6	1423	1828	1727	1181	649	407.5	429.1	635.9	942.5	1342	1792	2098	2025	1601	1079	1200	1950	2084	948.9	148.7	7.509	1.093	0.71	0.597	0.509	0.452	0.393	0.356	0.301	0.31	0.207	0.252	0.223	0.173	0.17	0.147	0.251	0.31	0.552	0.859	1.165	1.45	1.888	2.325
	310	146.2	371.5	861.1	1377	2014	2547	2460	1737	951.7	596.7	636.4	911.5	1367	1926	2533	2994	2981	2440	1608	899.3	923.8	1772	1911	923.2	144.6	6.82	1	0.85	0.626	0.57	0.467	0.437	0.381	0.336	0.352	0.257	0.218	0.214	0.222	0.203	0.293	0.49	0.644	1.069	1.533	2.071	2.679	3.286
	315	206.8	495.5	1040	1783	2710	3443	3320	2345	1310	816.1	859.7	1236	1815	2600	3392	3953	3999	3386	2302	1243	576.7	722.5	1602	1825	888.6	154	6.599	1.126	0.857	0.605	0.607	0.498	0.435	0.379	0.312	0.283	0.251	0.282	0.262	0.237	0.335	0.625	0.952	1.371	2.005	2.67	3.4	4.364
	320	238.1	572.9	1272	2214	3271	4135	4058	2890	1640	1028	1067	1501	2254	3173	4184	4844	4920	4239	3001	1651	719.7	308.7	594	1501	1732	876.1	151.2	6.583	1.165	0.822	0.719	0.66	0.488	0.49	0.405	0.404	0.333	0.276	0.286	0.35	0.433	0.66	1.103	1.701	2.31	3.128	4.07	5.338
	325	274.4	690.9	1473	2545	3765	4755	4650	3356	1915	1191	1225	1735	2550	3630	4773	5619	5656	4867	3535	2005	899.4	339.1	159.8	523.3	1411	1689	824.8	152.7	6.805	1.063	0.892	0.682	0.573	0.562	0.42	0.364	0.337	0.299	0.337	0.367	0.455	0.822	1.274	1.92	2.786	3.603	4.845	6.02
	330	292	730.5	1583	2710	4107	5242	5070	3702	2130	1300	1332	1868	2785	3961	5156	6051	6125	5347	3868	2270	1062	404.9	137.9	91.36	477.5	1368	1552	809.2	157	7.214	1.098	0.902	0.699	0.632	0.446	0.463	0.376	0.406	0.34	0.382	0.475	0.835	1.327	2.174	2.944	3.905	5.301	6.405
	335	290	740.3	1543	2801	4096	5199	5272	3851	2222	1347	1366	1930	2848	4059	5330	6260	6370	5532	4016	2373	1152	470.8	158.9	53.37	65.59	464.2	1243	1498	790.5	162.9	7.675	1.081	0.854	0.753	0.579	0.563	0.423	0.397	0.378	0.368	0.524	0.931	1.406	2.023	3.128	4.099	5.406	6.744
	340	294	738.2	1566	2758	4052	5199	5195	3758	2212	1334	1333	1867	2769	3981	5209	6165	6274	5483	4002	2369	1166	507	188.3	59.92	23.94	59.15	419.6	1201	1438	784.1	160	8.054	1.109	0.791	0.626	0.604	0.552	0.418	0.362	0.403	0.526	0.909	1.423	2.144	3.056	4.062	5.224	6.639
	345	288.8	667.6	1497	2531	3803	4943	4798	3606	2047	1273	1272	1771	2634	3750	4944	5848	5957	5219	3802	2266	1113	497.6	209.7	76.47	26.86	17.36	55.64	406.8	1130	1388	744.6	167.4	9.447	1.068	0.759	0.655	0.479	0.462	0.386	0.407	0.489	0.862	1.226	1.974	2.652	3.795	4.952	6.087
	350	257.7	634.4	1375	2356	3522	4471	4340	3318	1924	1186	1182	1645	2400	3457	4543	5353	5486	4799	3527	2104	1040	463	212.1	99.18	43.13	21.95	20.13	59.41	385.2	1079	1299	747.2	172.9	10.54	0.95	0.687	0.525	0.462	0.436	0.368	0.478	0.749	1.248	1.829	2.536	3.498	4.487	5.632
	355	231.2	555.7	1204	2045	3128	3921	3976	2982	1743	1088	1052	1465	2149	3080	4072	4788	4923	4253	3180	1903	956.7	425.9	192.9	110.2	67.39	37.87	27.58	26.72	61.48	365.1	1003	1288	757	186.4	11.82	0.954	0.607	0.489	0.429	0.361	0.464	0.693	1.149	1.584	2.335	3.113	4.16	5.079
	360	201.1	470.4	1030	1818	2772	3480	3486	2651	1550	966.1	939.8	1305	1906	2698	3547	4225	4299	3782	2798	1692	857	391.8	174.5	102.7	83.21	60.37	39.88	31.86	29.39	63.64	344.1	990.4	1278	773.8	190.5	11.87	0.794	0.575	0.407	0.333	0.445	0.702	0.981	1.431	2.07	2.752	3.56	4.468
	365	166.8	394	878.8	1568	2315	2993	2975	2254	1344	850.3	823.6	1128	1648	2324	3082	3630	3709	3282	2410	1478	758.4	353	165.6	92.13	80.28	78.32	59.91	42.36	34.5	31.81	61.71	343.7	985.9	1290	765.2	182.4	12.31	0.767	0.511	0.42	0.434	0.642	0.939	1.235	1.826	2.414	3.115	3.893
	370	133.1	362.9	781.7	1269	1981	2508	2538	1939	1154	740.1	710.9	961.4	1393	1995	2609	3067	3164	2776	2061	1265	664	321.2	157.4	90.11	73.94	83.27	81.19	60.59	44.07	37.13	31.85	59.2	339.2	986	1259	720	180	12.63	0.6	0.457	0.412	0.587	0.846	1.063	1.494	2.076	2.66	3.22
	375	121.8	281.9	642.7	1085	1611	2089	2142	1612	971.7	632.5	608.3	815.1	1176	1663	2178	2556	2629	2304	1734	1074	574.5	289.4	152.1	92.74	74.18	78.21	88.94	81.06	59.93	45.19	35.74	26.67	55.31	334.7	947	1165	688	171.5	11.96	0.657	0.569	0.607	0.753	0.988	1.258	1.773	2.189	2.811
	380	99.4	243.3	509.4	899.1	1351	1700	1743	1335	818.3	537.4	515.3	687.4	981	1371	1784	2118	2160	1907	1436	899	493.3	256.8	143.4	95.4	78.2	75.22	82.53	88.87	75.07	56.38	40.9	29.27	20.84	51.37	319.5	881.4	1091	639	152.2	12.08	0.703	0.592	0.641	0.89	1.158	1.424	1.894	2.216
	385	80.34	207.8	434	713.5	1074	1372	1413	1083	687.6	457.5	435.9	572.3	812.3	1128	1462	1727	1764	1567	1183	754	422.4	231.7	137.5	95.55	80.26	75.47	76.75	83.51	85.46	68.54	48.83	33.09	22.11	17.4	48.84	298.6	806.5	994.5	556.2	148.8	13.19	0.785	0.668	0.788	0.93	1.268	1.566	1.873
	390	62.45	164.9	348.6	596	867.3	1102	1145	906.9	576.4	392.4	374.9	479.2	665.6	916.1	1203	1393	1445	1275	970	629.3	362.5	207.6	130.6	96.93	83.32	78.4	75.41	76.95	83.02	79.65	61.17	40.49	27.35	18.8	15.68	46.47	272	728.2	883	538.9	156.7	14.77	0.877	0.794	0.861	1.106	1.278	1.554
	395	51.84	133.7	274.3	481.7	710.7	916.9	939.6	726.4	490.4	338.2	330.2	404.1	555.6	756.7	977.2	1138	1175	1045	802.4	527.2	315.2	189.7	125.5	96.08	84.77	80.98	78.54	75.76	75.92	81.31	72.16	51.72	33.54	23.61	17.51	14.47	41.6	247.2	656.9	838.1	537.1	156.4	13.99	0.912	0.788	1.017	0.989	1.323
	400	45.84	97.28	231.8	397.4	569.1	719.1	752.1	616.1	414	294.1	281.9	344.3	466	625.2	801.6	936	958.4	857.2	663.6	449.3	275.9	172.4	120.9	95.41	84.71	81.14	78.78	76.71	72.58	74.6	75.43	63.54	43.05	29.29	21.98	16.45	14.07	38.85	228.1	618.9	783.1	509.5	144.3	13.46	0.983	0.905	0.923	1.139
	405	41.14	101.6	194.1	324.9	454.6	594.4	626	500.7	348.5	262.2	249.5	302	389.5	519.6	661.2	762.5	788.5	707.5	553.5	380.2	242.7	160.3	116.2	93.94	85.05	80.66	79.66	77.11	73.23	68.95	71.1	68.84	54.56	38.73	27.89	21.09	16	13.3	36.64	202.9	548.2	752.7	484.9	134.6	14.05	0.98	0.883	0.931
	410	38.06	93.46	180.6	263.8	379.8	500.9	513.8	424.2	304.8	234.7	222.5	260.9	334.4	440	554.9	636.6	651.5	588.4	469.3	328.8	217.9	148.9	111.8	91.08	84.01	80.32	78.19	76.7	73.04	68.71	66.49	67.43	63.24	51.13	36.09	26.54	19.81	14.96	12.31	31.75	176.4	527.5	711.3	431.8	131.2	14.1	0.999	0.88
	415	27.93	82.72	157.4	241.2	322.6	413.5	435.9	366.1	270.7	214.6	206.2	235.2	292.9	374.1	468.5	538.8	552.1	504.3	406.2	289.8	200.7	140.7	107.5	91.17	81.58	79.2	78.06	76.49	73.23	70.47	65.42	63.06	64.94	58.82	45.92	32.66	24.55	18.5	13.79	11.14	28.49	175.8	499.3	619.7	415.2	124.7	12.86	1.025
	420	26.1	65.3	157	221.6	282.5	344.7	370	320.3	247.2	201.3	200	217.9	267.5	335.3	410.9	464.2	478.5	439.4	353.9	261.7	185.4	135.4	105	88.05	80.05	77.48	75.6	74.54	73.26	69.85	66.29	61.9	61.65	62.09	55.59	41.53	29.8	22.69	17.07	12.59	10.48	28.13	163.8	440.4	599.2	391.6	116.8	12.72
	425	22.09	55.57	148.3	218.4	268.9	316.5	331.1	294.3	231	194.6	188.6	209.1	251.1	307.5	368.4	411.8	426.3	385.8	318.1	240.8	173.2	128	102.6	84.95	77.26	75.04	74.76	73.79	71.83	70.09	67.16	63.26	60.09	61.75	60.74	51.14	37.22	27.21	20.63	15.67	11.45	9.841	26.34	146.9	419.1	564.4	370.1	113.6
	430	24.85	47.89	133.1	223.8	273.4	297.4	309.9	276.2	221.3	189.5	183.8	202.8	238.7	284.3	339.6	377.1	390.5	358.3	294.6	223.6	164.3	126.1	98	83.23	74.29	73.09	72.94	71.78	71.3	69.95	68.15	65.72	62.22	59.49	60.06	58.07	46.26	33.15	24.58	18.72	14.1	10.63	8.768	23.79	137.5	400.9	542.4	366.4
	435	20.32	44.76	106.5	213.1	291.9	301.4	293.2	260	212.6	182.6	180.6	197.2	234.3	274.6	320.3	356.1	365.3	336.4	282.4	212.8	159.6	121.3	97.66	79.95	73.24	70.2	70.88	70.14	70.53	69.28	68.04	66.51	63.68	61.49	58.9	59.12	53.55	41.54	28.98	22.42	17.11	12.69	9.392	7.861	22.16	132.9	392.6	545.7
	440	19.37	41.13	89.97	199.2	303.2	318	273.2	252.7	209.3	185.4	181.9	200.4	229.1	269.7	309.5	342.2	351.2	325.7	271.5	206	154.2	118	92.71	78.98	71.06	69.22	68.34	68.59	67.96	68.05	67.99	67.7	65.29	62.99	59.25	57.61	55.47	47.42	34.91	25.54	19.63	15.17	11.2	8.554	7.321	21.9	135.1	395.3
	445	17.54	40.61	87.57	157	307.2	357.8	305.2	251.5	204.1	180.7	176.3	196.5	224.3	256.5	300.5	329.6	335.3	312.4	261	199	148.2	113.9	90.79	75.38	67.79	67.02	65.84	66.43	66.8	66.54	66.78	65.93	65.94	63.35	59.99	56.87	53.56	50.03	40.8	29.64	22.11	17.13	13.01	9.852	7.725	7.106	22.21	136.6
	450	19.42	36.58	83.23	142.2	268.1	373	332.1	257.4	194.8	177.4	175	189.1	218.8	251.2	288.5	314.6	322.3	297.2	251.8	191.7	141.5	109	86.66	72.88	66.03	62.84	63.8	64.09	63.22	64.17	65.09	65.16	65.45	63.89	60.8	56.25	50.67	48.04	43.09	34.01	25.39	18.82	14.48	11.34	8.933	7.193	6.605	21.93
	455	16.24	38.49	80.06	120.1	223.8	403	387	278.1	190.8	170.9	167.5	182.1	210.1	243.4	276.4	299.7	305.9	285.9	236.4	181.1	133.6	104.2	83.29	69.06	63.06	60.58	60.04	59.63	60.69	61.08	62.96	62.22	63.51	62.73	59.53	55.27	50.17	45.04	42.29	37.21	28.76	20.82	15.67	12.65	9.938	8.003	6.485	6.356
	460	16.55	36.58	66.78	121.3	178.7	370.5	446.9	337.2	199.4	157.8	156.7	173.8	201.1	233.5	265.6	289.2	292.4	269.4	223.9	173.1	128.3	98.44	77.57	65.29	59.88	56.25	56.68	57	57.61	58.17	59.2	59.56	60.86	60.22	58.52	54.4	48.94	43.33	38.93	36.54	31.34	23.21	16.88	13.16	10.75	8.952	7.164	5.848
	465	16.26	31.5	66.8	119.1	161.7	286.6	466.4	424.7	245.8	156.2	148.4	167.5	186.1	217.3	246.4	270.1	273.7	254.4	211	162.4	120.2	92.09	71.92	60	55.74	53.11	53	53.34	53.72	54.46	55.68	56.75	57.52	56.94	55.67	51.63	47.76	41.61	36.27	33.38	30.82	25.88	18.91	14.03	11.37	9.461	7.757	6.477
	470	19.12	31.62	67.07	105.4	151.7	225.4	431.1	524.3	347.5	168.1	139.9	154.2	173.9	204.2	233.7	248.7	253.4	235.8	198.1	150.8	113.2	85.26	69.01	57.03	51.89	49.1	48.45	48.92	49.24	50.23	51.21	52.55	54.04	54.53	52.84	49.55	45.18	40.13	34.33	30.7	28.57	26.32	20.92	14.94	11.75	9.876	8.362	6.896
	475	15.74	29.85	56.79	92.78	142.7	187.6	321	563.6	483.8	237.5	136.1	143.9	168	190.7	218.9	235.7	239.1	219.4	184.9	138.9	104.6	79.09	62.32	52.89	48.04	46.59	45.21	45.29	45.65	46.46	47.49	48.91	50.7	51.06	49.16	46.41	43.03	37.86	33.32	28.51	26.03	24.61	21.64	16.76	12.92	10.26	8.659	7.554
	480	9.823	27.57	51.83	90.19	136.9	165.2	227.2	465.8	586.4	361.3	152.8	132.6	155	179.7	202.7	220.1	222.4	204.9	170.7	131	96.52	73.42	58.52	49.54	44.46	42.85	43	42.26	42.5	43.21	45.12	45.61	46.87	47.87	47.32	44.37	40.69	36.2	31.26	27.56	23.75	21.87	20.66	18.24	14.1	10.83	8.919	7.791
	485	10.37	24.62	46.52	85.52	124.3	159.6	178.3	317	592	490.9	225.2	130.6	146.8	167.1	187.4	206.4	207.8	190.2	159.8	121.2	90.64	68.3	54.68	46.57	42.16	40.38	40.01	39.71	39.72	41.31	41.96	42.73	43.79	44.61	43.83	41.6	38.63	34.94	30.46	26.97	23	20.22	19.04	18.05	15.34	11.96	9.399	8.179
	490	8.49	24.19	45.95	77.6	117.5	152.8	158.4	204.3	465.7	573.2	347.8	144.5	136.9	156.5	176.9	193.2	193.6	178.6	149	114.1	83.56	63.32	51.03	43.61	39.61	37.73	37.13	37.16	37.91	37.95	38.94	40.19	41.55	41.51	41.46	39.31	36.82	32.92	28.76	26.03	22.38	19.28	17.38	16.6	16.02	13.51	10.17	8.577
	495	10.65	21.6	41.04	71.08	111.4	140	148.9	145.2	284.5	567.1	465.4	205.4	131.1	145.1	165.3	174.3	179.9	163.5	137.6	105.2	78.59	59.32	47.23	40.55	36.17	34.78	34.97	34.39	34.82	34.66	36.69	37.32	39.01	39.25	38.78	37.42	34.71	30.83	27.29	24.7	21.64	18.35	16.22	15.38	14.89	14.19	11.35	8.827
	500	8.282	22.32	39.86	62.45	92.64	128.5	139.8	128.5	161	427.4	562	315.6	138.3	135.8	147.8	161.8	162.5	148.4	124.6	97.04	71.24	54.51	43.68	37.77	33.91	32.59	31.53	31.56	31.6	32.65	33.22	34.37	35.18	36.11	35.64	34.08	32.06	28.59	25.59	22.47	20.27	17.19	14.93	13.57	13.47	13.3	12.33	9.678
[truncated: 13 more columns]

## Sheet: α-glucosidase+CT
		200	205	210	215	220	225	230	235	240	245	250	255	260	265	270	275	280	285	290	295	300	305	310	315	320	325	330	335	340	345	350	355	360	365	370	375	380	385	390	395	400	405	410	415	420	425	430	435
	200	0.598	2.069	2.383	1.939	0.635	0.956	1.133	0.866	0.817	0.452	0.469	0.348	0.513	0.769	0.698	0.775	0.721	0.729	0.612	0.385	0.275	0.193	0.17	0.128	0.108	0.094	0.135	0.117	0.126	0.082	0.102	0.085	0.119	0.058	0.064	0.115	0.091	0.098	0.087	0.063	0.06	0.062	0.072	0.067	0.064	0.049	0.032	0.021
	205	2.48	4.732	7.272	3.853	0.926	1.46	1.113	0.915	0.566	0.682	0.374	0.558	0.791	0.645	0.717	0.93	0.737	0.618	0.454	0.403	0.263	0.19	0.151	0.164	0.134	0.143	0.15	0.123	0.096	0.109	0.082	0.079	0.119	0.098	0.096	0.089	0.069	0.06	0.075	0.073	0.058	0.069	0.073	0.073	0.068	0.083	0.045	0.041
	210	4.158	10.27	19.5	15.8	8.444	3.795	1.538	0.816	0.705	0.59	0.36	0.607	0.674	0.7	0.727	0.9	0.852	0.781	0.495	0.41	0.268	0.203	0.177	0.179	0.16	0.144	0.118	0.092	0.105	0.094	0.122	0.105	0.105	0.099	0.07	0.089	0.069	0.071	0.058	0.056	0.07	0.048	0.066	0.086	0.111	0.126	0.123	0.085
	215	1.796	6.727	24.79	36.76	31.92	15.16	3.385	1.177	0.56	0.782	0.647	0.769	0.791	0.659	0.909	0.766	0.68	0.681	0.58	0.424	0.333	0.175	0.177	0.211	0.152	0.144	0.125	0.108	0.123	0.069	0.083	0.089	0.128	0.096	0.089	0.091	0.095	0.077	0.068	0.092	0.07	0.06	0.047	0.073	0.108	0.181	0.169	0.17
	220	1.101	3.72	17.42	47.02	61.55	44.83	21.41	4.812	1.034	0.71	0.668	0.583	0.622	0.705	0.888	1.127	0.743	0.809	0.551	0.375	0.312	0.227	0.163	0.171	0.132	0.142	0.177	0.099	0.139	0.079	0.132	0.102	0.092	0.102	0.097	0.091	0.081	0.096	0.08	0.085	0.079	0.061	0.068	0.067	0.091	0.106	0.154	0.242
	225	1.095	2.746	7.387	30.49	83.05	107.1	94.03	38.36	8.238	0.871	0.735	0.564	0.643	1.03	1.012	0.75	0.919	0.759	0.613	0.43	0.335	0.287	0.175	0.161	0.124	0.163	0.155	0.139	0.119	0.125	0.127	0.125	0.105	0.104	0.1	0.06	0.089	0.082	0.073	0.082	0.073	0.06	0.064	0.069	0.059	0.051	0.118	0.148
	230	0.918	1.476	4.774	11.86	55.28	147.8	224.2	199.1	86.81	14.96	1.005	0.928	0.559	0.892	0.86	0.969	1.022	0.772	0.632	0.352	0.344	0.278	0.18	0.162	0.149	0.119	0.131	0.133	0.152	0.142	0.137	0.129	0.136	0.106	0.104	0.102	0.083	0.058	0.067	0.073	0.062	0.06	0.066	0.057	0.077	0.05	0.062	0.067
	235	0.842	1.583	3.505	7.555	18.64	101.8	306.3	486.4	391	154.5	19.5	1.045	1.188	0.993	1.128	0.933	0.957	0.808	0.672	0.504	0.353	0.306	0.189	0.195	0.159	0.16	0.183	0.14	0.133	0.112	0.131	0.108	0.103	0.101	0.086	0.102	0.106	0.063	0.076	0.062	0.058	0.066	0.065	0.047	0.049	0.044	0.072	0.075
	240	1.777	1.366	3.638	6.599	12.48	33.23	205.7	577	802.7	568.6	187.1	17.47	1.318	1.008	0.987	1.114	1.045	0.977	0.703	0.457	0.442	0.235	0.228	0.207	0.186	0.178	0.157	0.161	0.117	0.135	0.14	0.097	0.126	0.145	0.106	0.1	0.081	0.109	0.078	0.09	0.072	0.074	0.048	0.065	0.051	0.045	0.051	0.081
	245	2.253	1.537	2.278	4.415	9.577	18.27	54.62	321.4	808.6	1047	666.5	185.3	14.6	1.326	1.179	1.029	1.219	0.801	0.83	0.511	0.342	0.329	0.25	0.136	0.168	0.297	0.17	0.178	0.114	0.117	0.123	0.101	0.118	0.114	0.106	0.091	0.069	0.07	0.069	0.073	0.065	0.068	0.073	0.053	0.052	0.055	0.037	0.061
	250	1.981	1.942	3.319	3.394	6.299	15.77	27.06	71.46	387.4	955.4	1190	710.1	174.7	12.86	1.602	1.483	1.086	1.117	0.866	0.633	0.4	0.306	0.192	0.186	0.215	0.205	0.16	0.166	0.167	0.136	0.131	0.107	0.124	0.11	0.137	0.112	0.104	0.08	0.087	0.054	0.058	0.074	0.055	0.075	0.037	0.051	0.06	0.068
	255	2.436	2.272	3.282	3.35	3.456	8.798	21.81	33.32	77.94	415.2	1026	1283	708.9	156.6	10.67	1.763	1.412	1.089	1.039	0.606	0.542	0.324	0.279	0.257	0.205	0.209	0.144	0.154	0.138	0.173	0.144	0.114	0.121	0.106	0.16	0.112	0.105	0.087	0.072	0.057	0.063	0.07	0.075	0.068	0.056	0.048	0.06	0.058
	260	2.862	2.879	3.099	3.5	2.8	3.794	13.54	30.23	40.25	76.52	407.9	1091	1325	706.6	142.5	8.755	1.654	1.394	1.036	0.809	0.517	0.411	0.301	0.259	0.2	0.234	0.204	0.181	0.157	0.164	0.182	0.138	0.14	0.113	0.156	0.094	0.114	0.108	0.11	0.064	0.067	0.062	0.058	0.059	0.065	0.054	0.066	0.064
	265	1.935	4.305	4.275	3.595	4.585	2.956	4.483	19.12	39.93	42.55	68.67	409.2	1102	1343	704	125.6	7.3	1.614	1.088	0.863	0.666	0.434	0.411	0.307	0.249	0.295	0.184	0.198	0.153	0.178	0.163	0.15	0.13	0.145	0.141	0.126	0.115	0.096	0.076	0.085	0.084	0.077	0.075	0.068	0.051	0.058	0.056	0.072
	270	3.859	5.674	7.802	7.124	7.217	5.362	3.573	5.384	22.84	48.21	44.07	64.7	391.1	1109	1392	677.2	107.9	6.847	1.352	0.862	0.629	0.447	0.344	0.306	0.261	0.221	0.179	0.202	0.195	0.182	0.168	0.158	0.138	0.153	0.137	0.127	0.12	0.113	0.088	0.103	0.073	0.082	0.079	0.083	0.054	0.081	0.058	0.084
	275	4.728	7.96	15.81	12.98	12.12	6.763	6.227	4.018	7.701	31.72	51.6	41.35	58.14	384.2	1139	1358	649.8	103.4	5.28	1.113	0.759	0.548	0.395	0.362	0.299	0.216	0.209	0.19	0.198	0.181	0.153	0.138	0.116	0.12	0.155	0.128	0.102	0.107	0.085	0.094	0.061	0.071	0.054	0.088	0.081	0.089	0.084	0.098
	280	6.621	9.788	18.53	24.5	22.89	21.72	17.25	10.88	8.856	14.05	42.05	62.16	45.18	63.03	401.7	1142	1353	660.3	96.9	5.12	1.023	0.752	0.48	0.367	0.326	0.259	0.17	0.234	0.197	0.186	0.137	0.189	0.17	0.145	0.132	0.129	0.127	0.103	0.111	0.112	0.088	0.069	0.08	0.099	0.094	0.089	0.109	0.1
	285	9.187	14.63	28.61	41.21	54.19	63.02	53.72	37.67	22.87	16.47	28.84	68.73	88.85	77.61	101.7	437.8	1182	1441	685.6	101	5.676	0.992	0.699	0.481	0.452	0.29	0.229	0.28	0.189	0.214	0.189	0.155	0.176	0.158	0.146	0.146	0.122	0.122	0.104	0.11	0.077	0.097	0.084	0.141	0.128	0.121	0.175	0.186
	290	11.24	29.09	55.5	92.13	128	149.4	149.1	104.7	60.64	39.59	46.3	80.01	139.9	176.4	179.7	206.8	534.6	1332	1548	749.8	117.9	6.018	1.002	0.742	0.542	0.396	0.391	0.341	0.239	0.22	0.211	0.207	0.148	0.164	0.153	0.177	0.148	0.142	0.102	0.096	0.115	0.116	0.142	0.138	0.174	0.215	0.234	0.301
	295	17.3	48.31	98.5	177.6	260.8	322.8	324.7	234	136.5	88.12	95.55	142.9	222.9	327.4	384.1	386.6	377.4	682.1	1463	1695	853.9	126.3	6.203	1.098	0.742	0.445	0.452	0.359	0.249	0.266	0.269	0.249	0.167	0.171	0.206	0.177	0.132	0.14	0.13	0.098	0.135	0.114	0.162	0.198	0.267	0.322	0.419	0.53
	300	32.36	74.01	170.8	297.8	453.9	564.8	587.9	439	259.6	167.9	185.6	263.6	377.5	534.3	678.4	720.1	661.2	549.2	776.8	1601	1871	897	131	5.813	1.078	0.656	0.535	0.446	0.38	0.276	0.278	0.281	0.256	0.239	0.244	0.198	0.161	0.133	0.171	0.131	0.139	0.191	0.211	0.321	0.455	0.554	0.685	0.83
	305	53.63	108	265.4	454.6	659.2	900.8	949.4	706.6	428.7	286.8	304.9	429	603	814.8	1032	1162	1106	875.8	628.3	806.1	1701	1906	910.4	138.3	5.649	0.997	0.776	0.577	0.519	0.38	0.328	0.31	0.298	0.275	0.239	0.225	0.212	0.177	0.183	0.198	0.203	0.216	0.317	0.452	0.617	0.742	1.011	1.23
	310	64.44	155.5	360.8	636.1	961.7	1273	1353	1036	640.2	420.2	449.4	623	881.9	1190	1463	1651	1628	1362	933.5	555.3	755.2	1660	1888	918.4	146	5.587	1.083	0.754	0.602	0.457	0.398	0.355	0.31	0.318	0.309	0.221	0.226	0.207	0.183	0.163	0.237	0.339	0.413	0.638	0.833	1.101	1.374	1.738
	315	83.02	199.3	457.5	815.5	1278	1720	1799	1410	854.8	580.7	602.8	828.2	1175	1574	1945	2173	2169	1883	1332	750.2	378.9	641.7	1599	1859	939.3	151.5	5.947	1.105	0.757	0.661	0.566	0.47	0.399	0.354	0.333	0.278	0.252	0.24	0.232	0.194	0.267	0.339	0.548	0.772	0.96	1.434	1.816	2.148
	320	96.49	248.1	538.2	972.3	1471	2024	2201	1714	1058	699.5	734.5	1003	1424	1912	2357	2654	2638	2340	1708	985.2	450.6	214.6	570.8	1528	1853	899.4	163.3	6.062	1.003	0.827	0.684	0.518	0.536	0.41	0.372	0.351	0.326	0.247	0.299	0.257	0.3	0.356	0.652	0.949	1.24	1.624	2.078	2.642
	325	108.8	262.1	619.4	1089	1669	2285	2493	1944	1218	792	819.6	1136	1599	2162	2679	2999	3013	2657	1987	1187	554.9	214.5	118.4	526.7	1526	1741	910.1	162.9	6.615	1.007	0.845	0.652	0.546	0.452	0.449	0.382	0.335	0.287	0.296	0.257	0.333	0.402	0.66	0.984	1.395	1.839	2.316	3.013
	330	125.2	283.4	654.8	1162	1862	2457	2684	2120	1312	858	869.7	1211	1716	2314	2879	3230	3248	2866	2169	1325	648.4	254.7	87.35	76.52	515.5	1412	1732	899.5	178.8	7.326	1.076	0.813	0.709	0.619	0.423	0.375	0.325	0.309	0.318	0.291	0.335	0.458	0.664	1.072	1.489	1.952	2.565	3.174
	335	108.9	297.9	644.5	1166	1832	2472	2716	2177	1360	868.7	894.1	1232	1749	2356	2934	3305	3334	2951	2232	1382	704.3	297.7	100.1	34.26	63.04	477.8	1395	1674	915.4	185.3	7.797	1.014	0.782	0.704	0.493	0.441	0.422	0.331	0.319	0.29	0.328	0.536	0.789	1.067	1.482	1.993	2.568	3.286
	340	114.1	272.6	640.3	1148	1756	2431	2615	2122	1323	859.2	867.8	1191	1699	2303	2857	3247	3257	2889	2187	1356	705	321.4	120.1	37.67	17.39	57.69	469	1351	1672	913.8	191.9	9.232	1.082	0.806	0.617	0.575	0.426	0.347	0.32	0.361	0.354	0.472	0.714	0.976	1.481	1.888	2.477	3.195
	345	109.8	272.7	570.5	1071	1685	2251	2465	2030	1264	810.7	820.9	1123	1591	2158	2683	3048	3080	2733	2076	1288	671.4	315.5	140.2	51.62	19.27	14.42	59.54	459.7	1316	1631	912.2	203.2	10.54	0.957	0.746	0.636	0.419	0.415	0.311	0.323	0.396	0.517	0.66	1.024	1.4	1.893	2.352	3.089
	350	92.75	259.8	544.5	973.7	1490	2047	2286	1833	1159	763.9	750.1	1027	1465	1978	2468	2784	2832	2507	1917	1198	621.7	289.6	141.9	73.73	33.76	18.78	19.04	63.69	444.5	1279	1623	914.4	212.9	11.88	0.974	0.78	0.562	0.451	0.385	0.356	0.359	0.44	0.682	0.925	1.296	1.722	2.266	2.806
	355	79.18	222.2	475.3	856.6	1318	1850	2050	1664	1056	686.6	693.5	924.7	1294	1761	2202	2514	2530	2235	1711	1085	568.7	264.7	130.8	84.38	56.24	33.34	25.32	24.38	66.28	434	1265	1598	941.6	226.8	13.54	0.918	0.629	0.599	0.377	0.397	0.39	0.449	0.654	0.775	1.228	1.447	1.972	2.49
	360	74.97	193.2	442.9	732.9	1166	1600	1784	1463	932.2	620.5	603.8	821.3	1140	1539	1931	2175	2216	1972	1516	960.7	517.1	246.3	117.8	78.42	70.36	53.66	36.55	29.08	27.88	69.12	437	1235	1614	950.7	234.2	14.77	0.937	0.6	0.515	0.363	0.394	0.448	0.571	0.792	0.968	1.429	1.715	2.221
	365	63.62	156.1	354.3	620.1	985.6	1368	1532	1251	806	536.6	537.2	704.7	989.1	1329	1676	1883	1901	1696	1309	835.8	456.3	225.7	112.2	70.9	69.74	70.6	55.3	38.93	32.12	30.77	72	426.2	1255	1597	952.5	236.2	15.24	0.916	0.554	0.412	0.429	0.453	0.517	0.707	0.865	1.135	1.544	1.903
	370	60.47	137.9	299.4	529	832.2	1154	1282	1062	703.2	463.8	462.5	609.8	838.3	1139	1404	1589	1609	1439	1107	722.4	403.5	209.3	111.7	70.99	66.05	75.54	73.65	56.45	41.57	34.57	31.24	68.46	435	1235	1573	929.4	227	15.4	0.816	0.542	0.473	0.431	0.511	0.629	0.799	1.059	1.315	1.556
	375	50.67	117.2	234.4	422.4	678.5	939.9	1072	899.5	600.7	413.8	397.7	520.4	705.6	949.1	1180	1334	1344	1201	929.5	611	353.1	191.8	111.3	76.84	65.07	70.42	81.72	75.57	56.35	42.79	34.76	26.69	65.64	423.5	1204	1513	868	216.9	16.01	0.809	0.537	0.499	0.521	0.595	0.665	0.862	1.11	1.43
	380	39.86	87.27	211	368.8	563.3	779.5	897.8	743.6	507.4	358.3	350	440.3	600.6	785.1	982.3	1103	1120	994.9	772.4	518.8	306.4	177.1	108.8	79.39	67.82	68.03	75.95	83.83	71.78	52.95	39.39	28.01	20.77	62.26	407.1	1149	1391	824.8	215.1	16.15	0.81	0.634	0.52	0.571	0.684	0.83	1.009	1.161
	385	38.57	82.79	183.3	297.8	456.5	646	717.4	621.1	426.3	304.8	303.4	369.2	497.8	656.6	803.5	898	912.3	818.9	646.2	437.9	264.2	159.6	105.6	81.83	71.99	69.49	71.66	78.21	79.71	65.81	47.27	32.19	22.08	17.69	58.99	393.2	1043	1310	786.6	203.5	17.85	0.854	0.611	0.545	0.631	0.706	0.773	0.938
	390	31.74	65.95	142.9	251.3	375	526.3	596.2	521.4	365.6	268.8	260.6	317.4	412.8	541.3	666.2	741.1	746.5	674	533.3	370.3	232.2	148.3	104	84.34	76.41	72.14	72.22	73.11	77.92	75.92	58.78	39.56	26.23	18.69	16.18	57.18	353.1	973.9	1245	749	216.5	19.9	0.797	0.6	0.576	0.712	0.709	0.828
	395	27.33	59.26	119.7	206.3	304.3	424.8	467.4	430.7	311.8	238.9	231.2	275.1	347.1	448.3	542.6	610.7	611.4	555.1	442.7	314	206.6	139	103.5	85.78	78.19	75.09	73.56	72.92	72.29	76.96	69.88	49.88	32.9	23.32	17.47	15.49	51.21	329.3	935.5	1172	754.1	211	18.34	0.868	0.688	0.677	0.713	0.743
	400	22.28	47.95	99.44	171	256.4	344.1	405.6	355.5	269.7	212.1	202.1	235.1	298.7	374.7	449.2	503.8	506.4	460.1	373.7	272	185.8	131.7	102.2	86.85	79.53	77.21	75.98	72.43	69.01	71	72.64	60.77	42.2	29.03	22.02	16.55	14.96	49.74	324.8	872.3	1115	692	190.7	17.59	0.882	0.668	0.654	0.705
	405	20.33	43.42	86.93	149.1	206.1	290.2	325.3	300.9	240.6	190.1	185.5	211.8	253.4	317.6	372.9	420.9	416.9	381.4	315.5	237.1	169.3	125.3	99.69	86.15	80.39	77.69	74.86	72.97	69.17	66.98	68.42	67	54.03	37.75	27.67	21.41	16.38	14.34	48.71	286	782.3	1017	643.7	185.8	19.07	0.875	0.687	0.65
	410	19.84	39.83	79.5	116	166.2	233.6	271.9	254.9	209	178.2	168.8	190	223.3	274.4	317.6	346.1	347.7	324.6	271.4	208.2	155.3	119.2	97.62	85.25	79.05	76.37	75.08	73.07	70.36	66.53	63.96	64.82	62.69	49.3	35.48	26.32	20.75	15.33	13.72	42.17	252.5	720.9	949.9	612.2	181.7	19.5	0.899	0.694
	415	16.68	37.98	77.07	111.5	152.1	201.3	235.2	229.7	194.8	167.4	162.1	179.8	204.5	235.4	277.8	298.5	302.5	281.6	238.7	188.1	144	115.7	95.09	85.1	79.21	76.84	75.77	72.71	70.11	67.78	63.66	61.27	63.66	58.94	45.34	32.79	25.32	19.49	14.51	12.72	38.14	239.2	675.3	887.1	582.7	182.2	17.18	0.963
	420	14.54	36.28	70.48	109.2	135.7	178	211.1	207.3	178.8	159.7	157.5	165.4	190.6	218.9	245.4	265.2	263.7	247.3	213.8	171.6	135.9	110.6	93.39	82.52	77.24	75.23	73.04	72.27	69.98	68.15	64.56	61.49	60.76	62.31	55.49	42.18	30.6	23.54	18.2	13.84	12.25	36.73	221	634	848.3	571.8	160.8	17.15
	425	12.49	31.42	74.12	108.8	125.8	157.9	184.1	189.4	169.6	151.4	151.4	163.8	180.5	202	223.4	240.2	241	224.8	195.5	159.8	130.5	108.7	91.88	81	76.23	73.55	72.22	71.71	69.86	67.22	65.24	61.93	59.82	60.91	60.71	51.25	38.24	28.93	21.81	17.04	13.08	11.86	33.73	211.6	600.6	825	514.3	161
	430	9.964	25.44	67.9	118	132.8	155.6	173.9	181.9	165.1	155.3	153.7	161.6	175.4	191.8	208.4	221.4	223	207.3	183.4	153.3	126.1	105.7	90.16	79.87	74.36	71.14	70.31	70.69	68.57	67.96	66.7	64.05	60.68	59.42	60.8	58.18	46.71	34.58	25.6	20.35	15.84	12.43	10.37	32.75	198.2	590.2	766.6	522.6
	435	13.99	25.48	54.73	113.7	144.7	158.4	171.2	175.3	167.1	153.1	153.5	160.9	173.6	188.8	200.5	213.8	212.4	200.3	178.4	148.8	122.2	102.4	87.9	77.94	72.17	69.63	68.49	68.37	67.45	67.88	66.86	64.82	63	60.48	60.25	59.07	54.51	42.05	30.37	23.62	18.98	14.26	10.89	9.531	29.76	197.4	554.1	776.4
	440	10.94	19.68	43.44	96.58	148.9	176.3	173.1	169.6	160.7	154.4	149.6	158.8	173.6	184.4	197.2	203.6	204.3	191.9	169.9	141.6	117.3	100.1	84.95	75.26	69.92	66.95	66.87	66.09	67.14	66.29	66.47	65.49	64.88	62.41	60.21	58.48	56.06	49.34	36.31	27.29	22.02	16.96	12.84	9.683	8.778	30.92	190.2	567.2
	445	11.46	22.14	43.05	80.91	151.6	186.4	174.8	167.2	154.5	150.3	151.3	158.8	171.5	181	191.5	196.6	196.7	184.7	162.8	137.8	113.1	96.98	83.2	73.44	67.41	65.37	63.95	65.23	64.98	64.38	65.95	65.42	65.47	63.47	60.34	56.35	53.96	51.19	42.32	31.8	24.05	19.08	14.5	11.34	8.798	8.502	30	191.6
	450	11.95	24.4	34.9	69.25	129	201.7	198.9	166.8	154.1	148.6	145.8	153.2	162.8	176.1	184.7	192.7	188.6	178.5	159.8	132	109.6	93.31	79.6	70.61	64.89	62.16	61.62	61.47	61.95	62.91	63.63	63.54	63.78	63.4	61.12	55.92	51.94	49.6	44.76	36.55	27.47	21.01	16.07	12.92	10.17	8.262	8.097	28.98
	455	11.58	19.35	37.37	67.96	116.9	207.7	225.7	184.8	149.2	140.7	141.6	147.9	159.8	169.8	176.8	182.8	179.5	170.3	151.6	126.5	105.7	87.8	75.71	66.59	60.86	59.09	59.04	58.71	58.97	59.45	61.09	61.32	62.33	62.02	60.06	56.06	50.91	46.08	43.45	38.99	30.79	23.29	17.58	14.07	11.48	9.381	7.478	7.453
	460	10.31	19.44	35.33	57.4	92.75	199.5	275.3	231.2	155	134.1	133.4	142.6	150.2	161.2	170	172.5	171.5	160.3	143.9	119.1	97.81	81.9	70.9	62.77	57.86	56.19	55.85	54.8	55.7	56.96	57.55	59.41	59.62	59.7	58.12	54.94	50.04	44.14	40.96	38.5	33.4	25.46	19.02	14.93	12.51	10.15	8.317	6.75
	465	9.119	18.03	32.26	56.02	87.18	167.2	314	306	188.6	127.8	128.4	134.4	143.5	153.7	160.1	162.2	162	153.9	135.1	113.6	91.87	76.91	66.61	57.87	54.38	52.55	51.17	51.9	51.94	53.04	54.49	55.76	56.88	57.01	55.63	52.62	48.34	42.48	38.21	35.46	33.33	27.27	20.59	15.94	12.91	11.04	9.144	7.377
	470	7.599	14.11	29.71	55.48	75.56	120.3	286.6	398.9	278	143.7	119.2	124.3	137.6	145.1	150.8	152.6	152.5	143.2	127.3	106.5	85.96	71.81	61.31	54.53	50.09	48.58	48.07	47.47	48.97	48.71	50.73	51.89	53.36	53.31	52.7	49.99	45.58	41.15	36.1	32.47	30.54	27.54	22.68	16.87	13.3	11.29	9.634	7.722
	475	9.973	16.67	27.03	50.43	78.65	100.2	220.5	447.5	404.8	204.3	116.2	117	126.6	134.8	139.4	144.5	141.3	133.7	118.7	97.27	79.07	65.83	56.43	49.67	46.04	44.79	44.53	44.51	44.75	45.57	47.25	48.85	49.87	50.33	49.24	46.4	43.22	38.74	33.98	29.77	27.68	25.97	23.45	18.55	14.35	11.7	9.568	8.043
	480	7.731	11.83	25.79	46.25	72.16	95.32	149.4	384.9	522.8	325.6	134.3	111.2	119.8	127.7	133.2	133.1	134.4	124.6	109.3	90.73	73.26	61.83	52.09	46.13	43.13	41.89	41.62	41.53	42.07	42.53	43	45.32	46.36	47.12	46.61	44.1	40.77	36.61	32.13	28.81	25.46	23.82	22.56	19.55	15.49	11.88	10.18	8.464
	485	7.318	15.63	26.04	43	66.12	90.9	109.8	261.5	535.4	472.3	204.9	108.4	114.8	119.3	124.6	125.4	123.1	117.8	101.1	85.5	68.87	57.22	50.04	43.46	41.08	38.91	38.36	38.92	38.94	38.89	41.76	43.24	44.09	44.44	44.07	42	38.66	35.45	31.22	27.73	24.63	21.55	20.41	19.75	16.61	13.16	10.64	8.662
	490	8.804	13.79	20.98	43.45	57.94	79.1	101.8	155.2	420.4	557	334.8	122.9	105.1	111	116.4	118.9	117.3	108.2	96.62	80.9	64.75	52.84	46.12	40.19	38.32	36.67	36	35.78	36.65	37.09	38.25	40.38	41.63	42.3	41.58	39.79	36.65	33.95	29.89	26.52	23.72	20.76	18.66	18.07	17.36	14.72	11.55	9.199
	495	6.34	11.08	23.82	35.68	55.63	75.51	87.82	98.75	252.8	546.3	464.6	184.9	99.79	105	109	108.6	107.8	100.9	88.82	74.57	59.85	50.07	42.74	37.39	35.47	33.6	33.85	33.57	34.27	34.75	35.72	37.57	38.76	39.22	38.75	37.06	34.87	31.35	28.32	25.36	22.3	19.8	17.48	16.44	16.54	15.1	12.5	9.735
	500	6.402	12.82	19.86	35.06	46.54	66.54	83.23	86.04	136.7	410.1	546.8	297.3	110.1	96.93	99.43	99.48	98.78	91.65	81.03	67.07	54.48	46.08	38.95	34.62	32.19	30.91	30.47	30.96	30.96	31.86	32.99	33.8	35.41	36.07	35.9	34.02	32.28	29.51	26.48	23.78	21.12	18.62	16.42	14.81	14.55	14.73	13.1	10.43
[truncated: 13 more columns]

## Sheet: α-glucosidase+GA
		200	205	210	215	220	225	230	235	240	245	250	255	260	265	270	275	280	285	290	295	300	305	310	315	320	325	330	335	340	345	350	355	360	365	370	375	380	385	390	395	400	405	410	415	420	425	430	435
	200	1.898	1.273	1.791	0.925	1.425	1.317	0.724	0.506	0.526	0.371	0.37	0.605	0.544	0.803	0.91	1.078	1.103	0.825	0.631	0.435	0.179	0.208	0.159	0.137	0.073	0.069	0.08	0.068	0.062	0.084	0.039	0.043	0.046	0.059	0.048	0.054	0.062	0.059	0.04	0.047	0.027	0.026	0.034	0.058	0.035	0.032	0.033	0.026
	205	2.695	7.797	8.809	7.022	2.161	0.886	1.448	0.76	0.235	0.478	0.378	0.519	0.555	0.767	0.801	1.166	0.99	0.727	0.732	0.398	0.251	0.185	0.146	0.096	0.09	0.082	0.068	0.072	0.083	0.083	0.046	0.044	0.052	0.098	0.061	0.047	0.062	0.025	0.079	0.029	0.045	0.036	0.048	0.068	0.081	0.065	0.027	0.028
	210	2.842	14.41	31.92	27.77	13.72	3.898	1.573	0.743	0.411	0.366	0.291	0.661	0.423	0.816	0.916	1.098	0.956	0.804	0.692	0.385	0.23	0.19	0.178	0.118	0.128	0.09	0.079	0.081	0.096	0.077	0.05	0.068	0.07	0.084	0.041	0.058	0.063	0.061	0.045	0.042	0.026	0.053	0.067	0.082	0.112	0.106	0.11	0.073
	215	3.025	12.37	41.83	61.38	54.12	24.37	6.41	0.621	0.416	0.443	0.337	0.525	0.489	0.704	0.967	0.927	0.967	0.723	0.693	0.497	0.245	0.158	0.186	0.101	0.114	0.088	0.053	0.117	0.069	0.074	0.065	0.051	0.049	0.077	0.052	0.064	0.047	0.045	0.06	0.025	0.02	0.038	0.039	0.069	0.107	0.129	0.189	0.251
	220	0.387	4.749	36.37	90.37	115.1	83.79	36.75	7.709	0.695	0.285	0.463	0.409	0.616	0.844	0.902	1.121	0.937	0.824	0.724	0.476	0.306	0.192	0.168	0.098	0.096	0.136	0.111	0.101	0.069	0.08	0.076	0.103	0.058	0.086	0.047	0.078	0.074	0.035	0.048	0.033	0.028	0.039	0.032	0.056	0.082	0.124	0.193	0.363
	225	0.213	1.364	15.5	59.82	157.7	183.5	146.9	58.25	10.98	0.861	0.59	0.649	0.594	0.896	0.848	1.303	0.99	0.82	0.722	0.416	0.205	0.177	0.149	0.104	0.097	0.099	0.109	0.091	0.054	0.078	0.052	0.075	0.054	0.082	0.053	0.075	0.045	0.063	0.036	0.031	0.052	0.031	0.05	0.036	0.039	0.062	0.082	0.199
	230	0.641	4.283	8.007	21.44	104.8	263.5	333.3	254.3	105	16.54	1.007	0.732	0.9	0.859	1.036	1.179	1.181	0.928	0.841	0.532	0.315	0.188	0.156	0.096	0.104	0.109	0.062	0.091	0.1	0.076	0.07	0.086	0.071	0.052	0.051	0.06	0.054	0.047	0.069	0.018	0.048	0.042	0.05	0.046	0.039	0.048	0.028	0.101
	235	0.501	1.744	4.753	10.8	38.8	168.1	422.1	571.3	415.7	152.5	20.19	1.109	1.12	1.147	1.069	1.115	1.154	1.25	0.722	0.461	0.325	0.202	0.165	0.13	0.125	0.116	0.086	0.117	0.064	0.071	0.073	0.094	0.075	0.087	0.087	0.055	0.061	0.05	0.026	0.035	0.037	0.043	0.033	0.035	0.029	0.038	0.066	0.073
	240	1.087	1.041	2.335	8.715	22.7	58.34	266.9	633.1	802.4	550.7	178.5	17.36	1.557	1.348	1.503	1.458	1.554	1.101	0.748	0.567	0.288	0.273	0.158	0.172	0.125	0.104	0.109	0.097	0.086	0.07	0.063	0.082	0.089	0.065	0.065	0.039	0.061	0.046	0.066	0.042	0.015	0.042	0.035	0.029	0.036	0.035	0.04	0.066
	245	-0.241	1.417	1.312	5.56	20.1	30.96	77.19	343	795.1	996	618.3	173.6	16.99	1.606	1.365	1.46	1.463	1.394	0.937	0.606	0.405	0.274	0.217	0.173	0.124	0.14	0.12	0.111	0.088	0.1	0.057	0.082	0.061	0.097	0.068	0.062	0.033	0.036	0.038	0.051	0.043	0.041	0.055	0.041	0.036	0.03	0.038	0.024
	250	0.538	0.985	1.216	3.076	8.385	25.7	39.66	85.76	378.5	908.6	1130	673.1	176.5	14.66	1.774	1.768	1.777	1.424	0.881	0.631	0.403	0.271	0.212	0.193	0.146	0.11	0.16	0.116	0.079	0.105	0.085	0.068	0.082	0.099	0.075	0.074	0.062	0.047	0.051	0.047	0.034	0.037	0.043	0.035	0.033	0.035	0.024	0.042
	255	0.892	1.774	0.815	2.744	3.976	12.18	35.5	48.07	86.73	400.6	988.9	1240	720.6	170.2	13.75	2.208	1.779	1.596	1.162	0.826	0.406	0.306	0.212	0.201	0.147	0.122	0.132	0.1	0.131	0.09	0.104	0.087	0.097	0.055	0.087	0.082	0.05	0.064	0.044	0.044	0.058	0.052	0.05	0.042	0.037	0.042	0.037	0.037
	260	4.495	1.994	1.86	3.025	3.397	5.483	17.96	47.03	53.8	84.05	416	1100	1393	791	170.6	13.22	2.153	1.842	1.154	0.812	0.521	0.274	0.238	0.198	0.187	0.15	0.133	0.133	0.097	0.081	0.121	0.107	0.079	0.06	0.095	0.099	0.076	0.06	0.05	0.051	0.039	0.032	0.041	0.036	0.034	0.043	0.029	0.04
	265	2.379	5.468	9.741	11.99	6.748	4.559	6.792	24.39	57.93	60.4	80.91	442.9	1234	1589	868.7	174.9	12.69	2.219	1.394	0.888	0.574	0.326	0.251	0.192	0.201	0.21	0.143	0.139	0.115	0.095	0.116	0.087	0.079	0.058	0.072	0.078	0.067	0.085	0.069	0.064	0.044	0.048	0.042	0.047	0.063	0.064	0.053	0.036
	270	7.276	13.03	24.32	24.66	20.32	9.498	5.451	9.857	36.16	72.26	64.44	84.19	473.1	1391	1770	936.6	166.3	12.05	1.694	1.048	0.628	0.45	0.341	0.27	0.235	0.204	0.208	0.134	0.15	0.1	0.105	0.113	0.106	0.108	0.088	0.095	0.087	0.079	0.052	0.064	0.046	0.054	0.057	0.07	0.091	0.085	0.107	0.087
	275	8.347	21.52	42.67	46.93	38.66	22.38	10.77	8.89	15.87	52.46	87.95	73.67	91.55	524.2	1549	1917	958.3	162.8	11.36	1.521	0.831	0.485	0.384	0.342	0.29	0.172	0.197	0.142	0.15	0.123	0.133	0.115	0.13	0.132	0.109	0.081	0.073	0.089	0.083	0.07	0.062	0.085	0.08	0.092	0.115	0.139	0.188	0.143
	280	15.15	32.84	59.68	84.13	69.77	49.61	34.29	21.07	16.96	27.08	74.84	111.8	86.07	106.9	590.8	1670	1980	958.9	152.5	9.995	1.214	0.741	0.55	0.417	0.296	0.257	0.199	0.239	0.143	0.143	0.157	0.129	0.145	0.097	0.096	0.098	0.064	0.075	0.076	0.072	0.086	0.102	0.076	0.112	0.158	0.188	0.209	0.203
	285	21.29	53.81	93.39	133.8	142	134.1	107.9	66.74	36.71	30.24	55.77	121.4	156.6	136.7	176.9	690	1763	2013	953.3	145.6	9.742	1.077	0.65	0.567	0.36	0.332	0.269	0.22	0.167	0.14	0.152	0.164	0.133	0.148	0.111	0.108	0.109	0.088	0.06	0.073	0.08	0.092	0.143	0.178	0.26	0.269	0.308	0.273
	290	31.2	79.61	151.8	232.3	300.7	310	278.4	169.3	90.6	60.65	72.37	129.4	231.2	288.5	304	353.5	832.2	1810	1988	921.7	143.9	9.119	1.066	0.625	0.498	0.355	0.348	0.282	0.222	0.203	0.15	0.142	0.148	0.153	0.131	0.121	0.117	0.084	0.098	0.094	0.075	0.113	0.191	0.263	0.321	0.428	0.503	0.532
	295	55.22	132.6	256.4	410.6	548.1	623.9	563.3	360.5	192	117.7	132.2	200.4	329	504.4	609.3	622.1	601.3	947.6	1812	1934	893.5	137.1	8.078	1.055	0.638	0.428	0.324	0.282	0.271	0.199	0.189	0.18	0.231	0.147	0.171	0.122	0.124	0.099	0.081	0.122	0.128	0.19	0.238	0.336	0.462	0.535	0.792	0.879
	300	74.17	191.5	384.8	659.3	892.5	1116	970.9	654.1	345.8	216.6	231.8	346.5	518.8	768.1	1024	1109	994.6	792.6	973.5	1738	1835	845.3	126.8	7.419	0.92	0.64	0.566	0.42	0.33	0.244	0.228	0.231	0.196	0.188	0.151	0.163	0.122	0.107	0.135	0.159	0.146	0.231	0.331	0.566	0.644	0.915	1.151	1.436
	305	114.3	271.3	570	966.8	1382	1629	1532	1021	558.1	350.6	375	531.1	788.5	1130	1499	1716	1599	1228	804.4	889.7	1595	1704	789.1	122.6	6.802	0.962	0.664	0.572	0.414	0.308	0.307	0.253	0.21	0.244	0.207	0.173	0.161	0.16	0.139	0.174	0.212	0.322	0.509	0.722	1.013	1.295	1.588	2.008
	310	149.1	362	797.8	1345	1911	2299	2227	1511	809.4	506.6	534	773.8	1135	1592	2051	2362	2293	1810	1163	633.9	719.3	1442	1582	754.9	122.3	6.385	0.923	0.69	0.535	0.488	0.384	0.306	0.286	0.249	0.304	0.231	0.195	0.182	0.157	0.206	0.241	0.383	0.614	0.906	1.27	1.676	2.094	2.639
	315	184.8	461.6	1017	1747	2471	3040	2847	2009	1095	676.7	713.5	1012	1497	2103	2682	3044	3019	2474	1633	855.7	394.9	561	1300	1485	719.6	125.1	6.22	0.958	0.633	0.578	0.487	0.412	0.299	0.325	0.267	0.24	0.231	0.215	0.234	0.248	0.309	0.525	0.801	1.194	1.595	2.07	2.725	3.34
	320	223.3	555.1	1200	2079	3022	3737	3478	2436	1360	838.4	865.2	1236	1813	2532	3247	3679	3623	3026	2081	1107	470.5	205	470.8	1207	1394	698.3	128.6	6.143	0.854	0.716	0.53	0.445	0.379	0.356	0.345	0.268	0.265	0.217	0.202	0.28	0.355	0.517	0.941	1.326	1.82	2.473	3.295	4.056
	325	261.3	621.3	1368	2318	3330	4202	3941	2811	1557	968.4	983	1399	2051	2866	3675	4177	4086	3429	2419	1341	576.5	207.8	107.2	420.2	1134	1336	684.2	129.1	6.228	0.883	0.752	0.517	0.443	0.397	0.414	0.318	0.264	0.238	0.233	0.268	0.374	0.681	1.027	1.448	2.05	2.671	3.509	4.487
	330	277.6	694.8	1476	2445	3633	4652	4417	3083	1697	1035	1059	1507	2190	3083	3957	4483	4409	3674	2600	1485	679.5	247	82.64	65.66	384	1070	1280	667.7	132.7	6.571	0.85	0.678	0.511	0.479	0.409	0.374	0.32	0.275	0.245	0.298	0.427	0.707	1.083	1.558	2.195	2.965	3.627	4.827
	335	295.4	696.2	1477	2526	3769	4713	4409	3172	1777	1085	1093	1535	2247	3144	4058	4585	4507	3769	2656	1529	734.2	290.7	94.64	33.91	52.41	361.3	1030	1236	655.9	133.8	6.81	0.845	0.665	0.557	0.584	0.364	0.329	0.289	0.254	0.303	0.415	0.642	1.048	1.644	2.15	2.867	3.88	5.008
	340	263.8	704.9	1490	2490	3622	4470	4318	3106	1719	1073	1058	1480	2179	3033	3924	4464	4382	3687	2604	1492	725.7	317.8	119.1	38.68	18.19	47.19	345	978.4	1184	635.3	134.4	7.511	0.833	0.657	0.505	0.425	0.332	0.294	0.302	0.274	0.405	0.642	0.998	1.607	2.32	2.906	3.78	4.756
	345	255.7	631.8	1333	2349	3389	4215	4159	2943	1654	1009	1002	1406	2036	2852	3695	4181	4142	3489	2469	1419	682	310.5	141.5	55.2	21.7	15.59	47.09	332.1	917.7	1118	619	140	7.898	0.84	0.578	0.451	0.423	0.318	0.297	0.309	0.418	0.657	1.034	1.43	2.054	2.746	3.486	4.453
	350	239.1	585.8	1270	2116	3115	3861	3712	2702	1528	925.7	920.6	1279	1866	2609	3363	3814	3779	3200	2268	1308	630.8	283.7	144.5	79.05	37.07	19.77	18.36	48.93	311.1	871.2	1075	614.3	143.3	8.988	0.795	0.591	0.433	0.365	0.32	0.291	0.426	0.618	0.922	1.389	1.844	2.571	3.217	4.107
	355	192.5	516.4	1139	1870	2787	3377	3346	2430	1374	846.6	829.8	1144	1656	2328	3005	3429	3379	2854	2034	1187	579.2	257.7	130.3	91.68	60.6	34.47	23.68	21.94	49.52	291.1	824.8	1057	622	152.2	9.922	0.707	0.511	0.402	0.308	0.282	0.409	0.531	0.776	1.231	1.743	2.271	2.886	3.659
	360	171.1	461.4	967.5	1626	2424	2977	2931	2114	1210	750.5	737.8	1006	1460	2029	2617	2984	2944	2499	1795	1053	524.6	238.8	116.5	83.49	76.47	55.58	35.56	26.06	23.65	50.67	286.4	813.7	1046	627.2	155.7	9.948	0.647	0.414	0.416	0.289	0.338	0.518	0.805	1.052	1.588	1.978	2.61	3.104
	365	136.3	375.7	868	1414	2062	2529	2530	1796	1042	660.6	644.3	873.3	1258	1752	2257	2556	2543	2157	1537	917.4	470.2	221	109.8	73.14	75.56	74.23	54.76	36.53	28.19	25.89	50.48	279.2	806.2	1038	616.6	150.1	10.57	0.642	0.436	0.338	0.418	0.467	0.681	0.903	1.311	1.672	2.135	2.727
	370	131.2	321.2	699.3	1209	1684	2096	2112	1542	906.6	573	558.3	748.1	1071	1473	1897	2172	2142	1825	1326	795.9	414.8	205.7	111.4	72.83	67.81	77.81	75.57	53.34	37.64	30.36	25.47	48.21	277.1	790	1006	588	146.6	10.65	0.581	0.396	0.385	0.466	0.601	0.847	1.063	1.495	1.837	2.265
	375	110.6	271.9	579.4	990.7	1440	1781	1720	1295	767.6	500.5	479.3	640.4	905.1	1250	1605	1821	1798	1538	1116	684	366.9	192.4	110.3	77.77	66.71	71.27	81.42	72.7	52.13	37.61	29.04	22.3	45.79	272.2	757	945.3	554.9	139.6	10.29	0.581	0.413	0.472	0.558	0.693	0.963	1.245	1.709	2.007
	380	92.93	225.2	475.3	821	1133	1443	1432	1064	654.8	434.2	417.8	539	754.6	1041	1326	1504	1485	1273	935.4	577.1	319.2	177.3	108.6	80	69.11	67.41	75.45	80.8	67.74	47.42	34.45	24.87	17.82	42.97	255.1	706.8	880.4	517	128.9	10.25	0.606	0.47	0.519	0.636	0.842	1.071	1.288	1.635
	385	82.6	177.6	386.4	637	909.2	1177	1166	886.8	545.8	370.7	352.3	456.5	627.5	849.6	1092	1230	1232	1053	778.6	491	281.9	164.1	106.8	82.94	72.68	68.1	69.08	76.22	76.62	61.17	41.63	29.05	19.77	15.24	40.01	240.9	650.8	804.4	470.4	124.6	11.42	0.596	0.597	0.584	0.74	0.927	1.15	1.395
	390	59.32	151.3	312.7	525.1	770.5	948.6	949.6	721.6	457.9	317.2	305.7	381.2	519.6	704.6	892.8	1016	1013	874.5	649.7	420.7	250.1	151.9	106.4	83.99	74.9	70.31	68.5	69.62	74.9	71.6	54.02	35.71	23.86	17.38	14.32	38.11	218.5	589.8	742.6	449.7	130.6	12.35	0.685	0.574	0.645	0.773	0.928	1.203
	395	51.71	127.4	253.9	439.6	620.5	759.8	779.6	606.8	391.3	275.3	271	328.3	438.4	587.6	740.3	837.2	834.1	724.7	546.6	364.2	223	143.7	105.5	85.81	77.29	73.38	71.31	68	67.73	73.26	66.45	47.19	30.62	21.38	16.39	13.88	34.48	199.5	551.7	696.2	443.8	127.2	11.85	0.736	0.622	0.755	0.855	0.962
	400	42.28	102.9	216.6	345.2	518.6	644.2	635.6	496.5	330.4	243.1	237.7	287.3	371.5	491	615.4	689.8	696.1	605.6	463.5	314	204.6	136.4	102.1	84.92	77.48	74.07	71.41	68.95	65.45	67.08	70.09	58.66	40.35	27.81	21.21	15.91	12.9	33.01	190.5	509.4	648.7	413.5	116.3	11.13	0.704	0.665	0.702	0.791
	405	41.28	79.9	171.8	292.2	417.5	509.6	524.9	414.6	290.4	217.1	211.2	249.6	321.2	419.3	512.3	578.6	582.3	510.7	401.8	281	187.3	131.1	99.87	84.65	77.22	73.22	72.67	69.85	65.81	63.42	65.49	65.17	53.06	37.31	26.33	20.59	15.22	12.92	31.86	169	453.4	599.6	384	111.6	11.65	0.841	0.692	0.807
	410	35.55	81.07	150.5	228.4	341.6	421.3	423.6	354.7	262.2	204	194.6	225.3	281.9	358.7	440.4	495.9	496.3	449.3	354.1	253.8	174.4	126.9	99.51	84.78	77.34	73.72	72.7	69.67	67.67	63.6	62.47	63.87	61.62	49.12	34.92	26.01	20.09	15	12.3	27.69	146.1	420.1	560.9	360.4	107.8	11.4	0.804	0.71
	415	27.52	68.3	147	208	293.8	351.4	366.5	316.8	230.3	191.7	186	207	256.6	314	384.8	432.6	436	395.7	318	233.4	166.3	123.7	97.78	81.98	75.22	73	71	69.89	67.86	63.61	61.01	59.69	62.98	59.44	46.36	32.48	25.02	18.52	13.9	11.25	24.59	140.8	397.5	519.3	338	102.5	10.63	0.785
	420	22.01	69.1	137.9	204	246.6	309.8	324.8	273.2	214.6	178.1	175.9	196.7	236.1	286.1	340.8	383.4	387.3	356	290.1	214.5	158.2	120.2	94.71	80.88	74.56	72	70.77	69.46	68.1	64.81	61.61	58.68	59.47	62.7	55.82	41.51	30.24	22.52	16.67	12.72	10.18	23.69	130.9	368.8	486.9	319.1	94.43	10.48
	425	16.45	55.71	138.5	201.8	238.1	268.6	285.2	251.3	202.2	171.1	173.6	189.6	219.5	266.6	310.8	348.7	354.5	328.5	270.4	203.8	151.4	115.7	91.84	77.82	73.25	70.52	69.52	68.52	66.95	65.31	63.24	60.17	58.57	60.17	60.68	51.31	36.64	27.06	20.27	15.25	11.23	9.072	22.13	122.2	339.5	456.1	302.6	93.03
	430	18.1	44.2	121.2	211.1	244.6	264.4	265.1	236.7	194.9	167	169.3	184.1	211.9	249.4	292.5	324.2	332	306.4	253.2	194	147.1	113.4	89.62	77.57	70.11	68.53	67.67	66.76	66.61	65.97	63.96	61.97	59.4	57.64	60.43	57.4	45.2	32.4	23.65	18.18	13.5	10.08	8.261	20.62	112.2	323.7	441	296.4
	435	17.23	37.52	104.3	210.2	260.4	258.6	248.9	227.9	187.2	166.7	169	183.4	209.2	243.3	281.7	312.9	314.6	292.9	242.7	187	141.6	110.9	88.23	74.09	68.34	66.05	65.23	66.34	66.01	65.56	64.17	63.45	61.13	58.98	57.7	57.29	52.55	39.47	28	21.01	16.19	11.87	8.821	7.385	18.44	108.6	318.6	434.2
	440	15.84	38.19	86.84	182.1	283.2	293.8	257.2	224.7	184.4	166	167.3	182.3	206.2	242.5	273.6	297.8	305.1	280.2	236.3	180.7	136.4	107.3	85.86	71.66	66.42	63.86	64.35	64.63	64.21	64.77	64.02	63.65	62.35	60.28	57.41	55.47	52.91	45.45	33.29	24.4	18.49	14.13	10.47	7.88	6.724	18.18	110.1	318.1
	445	15.85	37.25	81.87	161.4	274.9	319.2	272.9	213.2	179.2	165.6	165.3	176.4	203	231.7	262.5	290.1	291	270.3	225.5	174.4	133.4	103.2	82.51	69.45	64.33	62.58	61.28	61.47	62.13	63.14	62.36	62.86	61.98	60.98	57.11	52.77	50.87	47.49	38.59	28.3	20.52	15.84	12.06	9.213	7.139	6.325	18.53	108.9
	450	15.65	36.73	73.22	124	247.4	340.6	308	222	177.1	158.8	156.7	172.6	197.7	229.9	257.3	276.7	278.1	256.8	213.3	166.9	127.4	98.65	79.06	65.65	61.29	59.44	59.02	58.72	59.31	60.41	60.64	60.35	61.07	60.14	57.28	52.8	48.64	45.35	40.97	32.42	23.63	17.28	13.15	10.23	7.901	6.275	5.895	17.87
	455	17.7	36.26	69.6	111.6	201.3	363.8	346.5	246.8	170.4	154.5	154.1	166.4	189.9	216.7	246.6	262.1	263.5	242.8	203.3	158.2	120.3	94.35	74.83	63.9	58.27	55.59	54.96	55.28	56.48	57.21	58.02	58.26	58.73	58.54	55.43	52.03	46.62	41.75	39.35	34.98	26.95	19.04	14.08	11.05	8.908	7.269	5.673	5.464
	460	15.05	34.16	67.72	106.4	174.2	320	412.6	297.8	179.5	144.3	145.5	163.1	183.5	206.5	231.8	249.5	251.9	230.5	192.7	149.4	112.7	87.24	69.94	60.02	54.59	52.19	51.35	52.45	52.97	53.15	55.44	55.08	56.34	55.54	54.06	50.02	44.24	39.33	36.24	33.87	28.46	21.35	15.18	12.12	9.44	7.921	6.246	5.381
	465	15.23	29.53	61.99	101.3	147.9	265.9	440.5	392.1	220.8	140.7	138.2	151.6	173.6	195.6	219.9	233	233.4	213.2	180.9	139.5	105.9	82.3	64.64	55.66	49.92	48.98	47.76	48.63	49.21	50.3	51.13	52.41	52.8	52.65	51.43	47.43	43.32	37.79	33.03	30.26	28.59	23.24	17.02	12.61	9.882	8.326	6.873	5.64
	470	10.89	29.51	54.14	100.7	135.4	201.7	405.2	485.8	313.6	156.4	128.7	142.8	162.1	185.2	204.1	217	215.9	198	165.6	128.4	96.86	75.01	60.18	51.76	46.27	45.63	44.31	45	45.01	46.13	47.42	48.23	50.15	49.4	47.98	45.38	41.14	35.73	30.93	27.34	25.57	23.67	18.61	13.33	10.34	8.637	7.222	6.123
	475	9.128	24.73	51.85	91.32	126.2	171	290.1	521	425.7	214.2	122.5	131.1	151.1	168.8	190.2	202.9	201.5	184.2	154	119.4	91.75	70.2	56.29	47.77	43	41.39	41.07	41.68	41.91	42.4	43.95	44.73	45.96	46.3	44.83	42.27	38.49	34.18	29.68	25.45	23.49	21.89	19.57	14.97	11.06	8.975	7.415	6.261
	480	9.068	21.22	52.34	81.65	124.5	148.9	207.4	426.7	528.1	328	141.7	123.4	141.8	161	176	188.6	185.8	169.7	143.1	109.8	83.22	64.51	52.28	44.11	39.73	38.49	38.24	38.77	38.44	39.34	39.86	42.22	42.86	43.32	42.4	39.99	36.53	32.29	28.11	24.51	21.37	19.45	19.13	16.46	12.45	9.193	7.678	6.6
	485	10.24	19.33	46.61	75.13	125.9	146.9	159.6	286.4	524.5	442.8	209	118.9	132.1	152.2	164.1	174.2	172.1	158.6	132.4	102.7	77.96	61.02	48.25	41.58	37.37	36.24	35.59	36.28	36.73	36.85	38.16	39.24	39.87	39.96	39.71	38.29	34.41	30.64	26.77	23.54	20.42	17.98	17.04	16.2	14.13	10.35	8.26	6.829
	490	9.401	19.3	41.22	69.31	109.2	132.3	140.1	181.9	411.3	524.5	313.1	131.3	122.9	139.6	156	161	161.3	147.7	124.3	94.76	71.67	55.54	45.27	39.46	35.66	34.25	33.19	33.61	33.08	34.73	34.96	36.48	37.59	38.03	37.16	35.66	32.45	29.1	25.99	22.47	19.58	16.96	15.27	14.99	14.42	11.75	8.775	7.223
	495	8.553	19.99	38.69	68.71	97.01	120.4	134	131.4	259.4	516.7	428.9	188.9	115.6	129.8	142.2	151	148.5	135.1	113.4	87.23	66.54	51.48	41.99	35.45	32.21	31.23	31.49	31.25	31.41	31.84	33.29	33.68	34.8	35.03	34.63	32.3	30.44	27.37	23.98	20.91	18.72	16.12	13.8	13.14	13.14	12.55	10.21	7.528
	500	8.233	17.32	36.25	61.26	83.38	108.2	124.8	112.7	140.3	389.7	504.5	288.8	124.7	119.8	129.5	137.6	134	122.9	103.7	78.79	59.66	47.04	38.35	32.62	29.96	28.69	28.14	28.26	28.14	29	30.58	30.7	31.92	32.37	31.7	30.45	27.7	25.39	22.71	19.48	17.42	14.98	13.05	11.79	11.62	11.95	10.75	8.249
[truncated: 13 more columns]

## Sheet: α-amylase
		200	205	210	215	220	225	230	235	240	245	250	255	260	265	270	275	280	285	290	295	300	305	310	315	320	325	330	335	340	345	350	355	360	365	370	375	380	385	390	395	400	405	410	415	420	425	430	435
	200	2.051	4.655	3.697	2.112	1.224	0.638	1.243	0.84	0.671	0.413	0.449	0.698	0.411	0.849	1.024	0.961	1.098	1.033	0.615	0.477	0.261	0.237	0.157	0.134	0.1	0.119	0.111	0.079	0.059	0.12	0.129	0.078	0.067	0.078	0.063	0.074	0.051	0.067	0.043	0.041	0.04	0.057	0.061	0.053	0.041	0.05	0.028	0.031
	205	7.799	11.15	15	8.243	2.329	1.024	1.504	0.751	0.545	0.581	0.384	0.597	0.549	1.125	1.137	1.045	1.178	0.853	0.609	0.506	0.287	0.212	0.12	0.121	0.071	0.087	0.092	0.091	0.065	0.076	0.084	0.098	0.056	0.08	0.052	0.077	0.044	0.072	0.059	0.043	0.055	0.051	0.065	0.08	0.075	0.09	0.043	0.03
	210	8.578	25.53	39.39	30.67	17.94	4.48	1.162	1.038	0.648	0.42	0.362	0.758	0.531	0.925	0.928	1.149	1.194	0.86	0.661	0.371	0.345	0.146	0.169	0.131	0.141	0.104	0.099	0.089	0.126	0.103	0.079	0.083	0.074	0.097	0.053	0.071	0.064	0.077	0.046	0.059	0.057	0.049	0.089	0.089	0.136	0.12	0.144	0.098
	215	7.311	19.16	53.5	81.57	71.46	31.55	7.318	1.494	0.934	0.494	0.604	0.643	0.786	0.83	1.151	1.295	1.115	1.053	0.631	0.541	0.28	0.214	0.172	0.134	0.158	0.107	0.116	0.1	0.129	0.064	0.098	0.075	0.076	0.065	0.058	0.055	0.067	0.074	0.048	0.067	0.034	0.057	0.074	0.076	0.14	0.211	0.267	0.224
	220	3.13	11.37	43.43	106.6	152.5	119.7	49.4	11.42	1.064	0.99	0.511	0.618	0.979	1.113	0.958	1.428	1.374	1.022	0.821	0.485	0.33	0.258	0.167	0.126	0.118	0.17	0.152	0.094	0.123	0.107	0.116	0.089	0.083	0.078	0.081	0.075	0.078	0.072	0.04	0.048	0.041	0.061	0.028	0.069	0.081	0.144	0.245	0.32
	225	0.717	5.4	17.73	78.39	194.5	266.2	213.4	87.34	16.71	1.123	0.806	0.796	1.108	0.957	1.516	1.302	1.283	1.083	0.817	0.522	0.328	0.233	0.186	0.143	0.125	0.157	0.132	0.126	0.114	0.101	0.058	0.076	0.062	0.087	0.05	0.061	0.051	0.07	0.044	0.054	0.049	0.032	0.061	0.057	0.062	0.085	0.15	0.23
	230	1.174	4.6	10.23	31.85	136.1	366.3	498.6	375.2	151.6	24.4	0.941	0.934	1.247	0.976	1.279	1.453	1.587	1.166	0.813	0.511	0.341	0.213	0.169	0.156	0.143	0.142	0.134	0.112	0.105	0.082	0.091	0.094	0.077	0.084	0.061	0.081	0.067	0.051	0.07	0.052	0.051	0.043	0.068	0.044	0.067	0.076	0.059	0.086
	235	1.947	2.968	9.483	18.67	52.05	239	620.4	824.1	586.8	203	24.81	1.54	1.302	1.034	1.333	1.691	1.45	1.101	0.991	0.53	0.3	0.287	0.21	0.161	0.145	0.111	0.116	0.087	0.096	0.078	0.066	0.107	0.052	0.075	0.057	0.1	0.047	0.071	0.057	0.05	0.038	0.055	0.049	0.035	0.061	0.064	0.068	0.061
	240	1.205	2.538	4.176	13.67	29.5	79.65	381.2	883.9	1092	710.7	221.3	19.21	1.466	1.404	1.893	1.457	1.409	1.226	0.925	0.585	0.367	0.291	0.258	0.19	0.144	0.153	0.129	0.133	0.131	0.115	0.123	0.119	0.063	0.071	0.091	0.096	0.064	0.069	0.07	0.057	0.058	0.048	0.046	0.04	0.04	0.04	0.066	0.089
	245	2.259	1.453	1.103	8.399	21.97	40.51	103.5	462.9	1053	1257	781.7	208.9	17.3	2.001	2.128	1.776	1.712	1.319	0.859	0.693	0.428	0.292	0.218	0.206	0.176	0.177	0.132	0.107	0.134	0.085	0.141	0.103	0.096	0.093	0.077	0.088	0.066	0.088	0.063	0.063	0.057	0.056	0.056	0.046	0.047	0.028	0.06	0.041
	250	3.538	2.591	2.261	4.502	9.338	29.63	47.78	106.8	477.2	1127	1388	815.1	204.4	15.7	2.483	2.063	1.859	1.325	1.112	0.674	0.481	0.348	0.202	0.253	0.234	0.176	0.167	0.143	0.127	0.094	0.106	0.143	0.105	0.085	0.077	0.085	0.066	0.072	0.047	0.067	0.058	0.054	0.042	0.054	0.036	0.044	0.066	0.032
	255	2.988	0.771	2.147	5.96	4.798	15.46	41.41	54.59	98.49	482.8	1246	1528	867.3	199.2	13.04	2.54	2.043	1.741	1.138	0.724	0.538	0.373	0.241	0.264	0.19	0.226	0.158	0.121	0.147	0.133	0.093	0.112	0.098	0.098	0.084	0.106	0.075	0.051	0.091	0.07	0.053	0.059	0.031	0.036	0.051	0.052	0.051	0.047
	260	3.982	4.49	4.547	3.858	4.181	6.134	21.55	49.76	56.76	91.73	494.9	1364	1707	945.5	192.6	13.19	2.653	2.069	1.413	0.978	0.591	0.41	0.294	0.243	0.216	0.213	0.2	0.13	0.117	0.128	0.13	0.111	0.139	0.135	0.114	0.1	0.076	0.069	0.09	0.059	0.059	0.072	0.053	0.061	0.044	0.039	0.056	0.039
	265	7.774	10.74	12.35	13.43	7.273	6.713	7.818	25.56	57.57	60.15	88.01	532.4	1513	1930	1032	187.2	12.05	2.185	1.59	1.221	0.684	0.478	0.327	0.28	0.236	0.255	0.202	0.158	0.127	0.145	0.127	0.132	0.112	0.1	0.123	0.072	0.074	0.089	0.104	0.07	0.08	0.087	0.049	0.049	0.07	0.099	0.08	0.059
	270	16.15	23.77	39.54	33.4	17.97	10.08	7.249	9.168	34.26	69.2	61.82	86.97	564.3	1687	2158	1102	182.7	12.06	2.144	1.268	0.836	0.561	0.431	0.272	0.335	0.237	0.197	0.193	0.181	0.194	0.168	0.143	0.107	0.148	0.166	0.097	0.099	0.096	0.083	0.093	0.085	0.082	0.078	0.118	0.116	0.122	0.127	0.093
	275	28.26	47.28	62.16	83.84	58.39	40.57	24.12	12.82	15.72	47.29	80.13	70.82	98.49	619	1879	2333	1158	184.4	11.16	1.806	1.047	0.666	0.496	0.409	0.301	0.298	0.216	0.186	0.226	0.195	0.174	0.134	0.149	0.112	0.109	0.132	0.108	0.112	0.082	0.105	0.091	0.122	0.118	0.165	0.182	0.246	0.191	0.168
	280	59.38	90.88	148.5	190.9	227.6	224.9	138.7	64.91	28.85	34.63	85.84	129.3	134.1	187.3	806.7	2134	2531	1249	187.5	11.43	1.679	0.977	0.729	0.575	0.421	0.356	0.234	0.269	0.201	0.189	0.178	0.129	0.163	0.14	0.127	0.141	0.13	0.134	0.137	0.136	0.147	0.184	0.226	0.284	0.322	0.358	0.373	0.439
	285	112.2	186.5	336.6	494.6	694.9	746.7	523.3	246.1	95.31	66.26	108.8	222.5	342.7	432.7	576.7	1224	2521	2819	1279	186.2	10.86	1.564	0.833	0.639	0.572	0.482	0.355	0.3	0.243	0.225	0.222	0.181	0.189	0.138	0.127	0.164	0.139	0.144	0.179	0.212	0.292	0.341	0.38	0.471	0.568	0.761	0.973	1.167
	290	225.8	330.9	588	964.6	1459	1580	1190	576.4	212.4	132.8	193.4	360.3	626.6	918.4	1146	1270	1701	2788	2823	1295	197.2	10.7	1.442	0.868	0.736	0.467	0.473	0.335	0.343	0.276	0.223	0.238	0.219	0.205	0.177	0.16	0.208	0.205	0.279	0.403	0.502	0.57	0.616	0.814	1.07	1.338	1.829	2.274
	295	340.3	475.5	844.3	1430	2139	2532	1921	958.2	367	208	288.5	513.9	894.8	1394	1824	1952	1670	1695	2628	2796	1309	188.7	9.577	1.426	0.882	0.76	0.59	0.421	0.38	0.308	0.325	0.262	0.247	0.247	0.197	0.226	0.23	0.292	0.407	0.595	0.644	0.751	0.951	1.153	1.473	1.949	2.637	3.484
	300	393.6	567.8	997.2	1781	2631	3157	2453	1289	503.1	280.9	382.9	657.4	1099	1731	2369	2564	2167	1353	1300	2476	2736	1267	184.3	8.72	1.358	1.027	0.77	0.532	0.482	0.467	0.379	0.339	0.349	0.271	0.271	0.186	0.215	0.335	0.509	0.665	0.828	0.932	1.195	1.445	1.845	2.461	3.392	4.332
	305	428.5	661.1	1154	1944	2952	3543	2814	1545	637.6	367.2	461.2	772.1	1265	1938	2634	2988	2596	1659	826.5	1076	2348	2589	1214	180.2	7.977	1.264	0.894	0.759	0.554	0.544	0.463	0.393	0.38	0.281	0.297	0.22	0.257	0.323	0.52	0.767	0.921	1.085	1.311	1.528	2.068	2.744	3.552	4.73
	310	456.9	716.4	1181	2048	3067	3653	3026	1706	739.7	448.6	542.6	871.7	1387	2098	2806	3211	2955	2022	1071	554.4	941	2184	2456	1156	179	7.23	1.268	0.947	0.74	0.616	0.47	0.461	0.363	0.33	0.309	0.268	0.3	0.337	0.503	0.771	0.937	1.186	1.391	1.713	2.239	2.906	3.855	4.892
	315	450.8	734.8	1228	2117	3113	3688	3118	1828	865	547.5	637.1	988.1	1530	2231	2971	3388	3229	2431	1445	727.5	378.8	796.4	2029	2312	1115	188.5	7.642	1.316	0.877	0.754	0.58	0.51	0.417	0.373	0.372	0.256	0.268	0.345	0.532	0.777	0.938	1.111	1.44	1.67	2.309	2.952	3.803	5.099
	320	460.2	744.3	1266	2154	3191	3805	3216	1938	973.8	640.5	749	1100	1666	2383	3137	3595	3480	2808	1852	993.8	443.5	219.1	694.4	1887	2193	1092	194.8	7.498	1.124	0.853	0.754	0.631	0.49	0.387	0.368	0.344	0.335	0.374	0.521	0.703	0.92	1.133	1.506	1.766	2.317	3.047	4.008	5.005
	325	445.9	789	1317	2242	3247	3919	3376	2077	1086	745.6	843.2	1214	1805	2546	3309	3820	3753	3136	2214	1263	567.5	206.8	123.8	641.1	1803	2089	1080	196.3	7.717	1.155	0.973	0.725	0.602	0.458	0.452	0.399	0.345	0.406	0.462	0.721	0.907	1.224	1.598	1.948	2.484	3.19	4.127	5.431
	330	464.3	788.4	1444	2281	3426	4008	3475	2197	1176	829.9	927.7	1312	1915	2693	3472	3997	4004	3416	2492	1469	690.7	251.5	80.01	83.6	602.3	1676	2048	1049	206.3	8.075	1.241	0.846	0.718	0.478	0.42	0.43	0.365	0.435	0.514	0.764	0.972	1.253	1.6	1.919	2.499	3.289	4.323	5.537
	335	479.9	828.2	1416	2355	3426	4071	3458	2255	1245	888.7	983.3	1386	1989	2761	3567	4077	4150	3626	2650	1591	776.9	302.2	92.07	29.98	71.04	563.3	1643	1941	1040	202.2	9.164	1.116	0.826	0.676	0.559	0.414	0.4	0.389	0.536	0.724	0.946	1.289	1.719	1.942	2.533	3.288	4.363	5.542
	340	447.1	785.5	1388	2307	3396	4024	3461	2215	1262	917	1002	1404	2012	2769	3542	4060	4144	3653	2736	1628	797.2	338	116.5	32.91	15.08	64.93	552	1551	1888	990.4	216.7	10.19	1.053	0.779	0.659	0.546	0.475	0.45	0.505	0.682	0.967	1.279	1.524	2.09	2.525	3.346	4.424	5.574
	345	402.4	740	1375	2245	3326	3809	3287	2164	1241	892.8	1005	1375	1969	2699	3408	3966	4045	3604	2705	1620	778.1	335.8	137.6	47.91	14.72	10.94	64.63	516	1469	1754	1019	220.9	10.92	1.014	0.79	0.647	0.518	0.504	0.558	0.636	0.892	1.247	1.493	1.963	2.547	3.129	4.18	5.269
	350	406.1	689.3	1269	2106	3126	3576	3065	2058	1173	859.6	957.1	1320	1872	2544	3239	3739	3859	3436	2604	1553	743.2	308.9	136.8	65.15	24.7	8.976	9.571	61.28	485.1	1359	1779	985.6	224.5	12.44	0.968	0.693	0.585	0.488	0.565	0.651	0.812	1.157	1.583	1.863	2.381	3.055	3.945	4.993
	355	374.7	652.5	1207	1992	2834	3310	2826	1879	1092	805.9	885.5	1233	1735	2366	3031	3474	3544	3202	2430	1466	699.8	282	118	70.37	41.7	16.51	7.225	8.689	58.26	445.4	1365	1697	993.4	238	14.5	0.936	0.737	0.634	0.53	0.715	0.814	1.105	1.344	1.707	2.175	2.81	3.796	4.689
	360	321.1	585.1	1081	1788	2625	3014	2541	1716	988	731.1	820.2	1122	1582	2155	2731	3124	3229	2927	2224	1333	644	259.9	98.97	57.55	50.62	31.17	12.52	6.304	7.947	54.54	450.5	1294	1691	1005	243.9	15.17	0.962	0.678	0.629	0.67	0.811	1.032	1.318	1.578	1.99	2.678	3.406	4.305
	365	288.7	529.3	922.6	1542	2331	2674	2282	1507	878.7	657.8	726.1	995.4	1413	1929	2428	2800	2888	2603	1984	1194	575.5	233.9	88.75	41.72	42.46	43.06	25.32	9.791	5.412	7.411	56.64	435.2	1301	1665	980.1	235.8	15.73	0.935	0.648	0.694	0.805	1.021	1.234	1.412	1.88	2.422	3.056	4.037
	370	249.7	484.5	802.8	1391	1994	2301	1954	1304	776.9	574.9	642.2	885.8	1240	1672	2118	2441	2517	2272	1744	1045	508.9	209.7	81.01	35.29	28.44	39.19	37.65	19.87	7.958	5.286	7.508	54.98	443.7	1272	1607	940.2	238.1	16.97	0.961	0.695	0.8	0.895	1.107	1.332	1.645	1.937	2.623	3.44
	375	225.7	378.3	681.1	1220	1697	1960	1676	1114	666.1	495.7	553.4	760.5	1067	1429	1824	2080	2140	1944	1493	899.9	440.1	185.6	74.1	33.51	22.14	26.93	38.13	32.83	15.84	6.869	4.981	6.96	57.27	434	1206	1499	913.5	239.5	16.94	0.936	0.827	0.808	1.007	1.123	1.452	1.799	2.339	2.875
	380	171.6	331.6	595.9	1012	1412	1643	1408	936.4	564.5	420.5	469.1	640.6	896.4	1221	1526	1760	1808	1647	1264	769.5	376.5	161.1	66.83	32.56	20.84	18.82	27.41	36.36	27.38	12.81	5.981	4.38	7.111	55.86	402.7	1128	1455	884.6	219.6	17.14	0.962	0.942	0.985	1.019	1.256	1.509	1.991	2.521
	385	146.6	263.9	493.1	812	1206	1358	1175	778.1	469.9	354.8	397.4	538.7	755.4	1014	1274	1466	1512	1372	1057	640.1	316.5	138.6	60.91	30.81	20.8	17.74	18.5	27.85	33.41	23.57	10.07	5.153	4.29	6.688	52.37	380	1074	1376	807.1	213	17.92	1.087	0.89	0.927	1.17	1.338	1.616	2.226
	390	122.2	208.6	398.9	668.3	1003	1133	959.6	638.2	388.7	298.4	333.4	447	623.8	840.2	1058	1204	1240	1138	868.9	532.7	266	119.1	54.8	30.61	21.27	18.13	15.77	19.42	27.93	30.24	18.69	8.456	4.811	3.952	6.304	50.48	358.9	1011	1272	767.2	211.9	19.79	1.114	0.905	0.987	1.183	1.439	1.771
	395	112.1	185.9	334	583.1	811	912.4	783.8	521.2	323.4	249.1	275.6	373	511.7	685	862.9	987.1	1017	926.9	712	438.2	222.7	100.8	49.53	28.68	21.93	18.76	16.32	15.02	19.1	27.65	26.6	14.96	6.807	4.396	3.822	6.016	46.65	334.1	942.8	1180	731.8	208.6	18.51	1.003	0.927	1.071	1.24	1.464
	400	86.01	149.6	274.1	467.6	659.4	747.9	634	423.8	266.2	211.1	225.5	303.8	420.2	562.6	693.6	801.7	824.3	751.4	578.2	359.8	183.4	86.42	44.44	27.95	22.09	19.5	16.97	14.76	14.38	19.87	27.27	23.41	12.23	6.006	4.208	3.458	5.385	45.21	323.5	866.4	1075	673.2	186.8	18.11	1.033	0.964	1.131	1.27
	405	80.52	128.9	228.6	368	529.4	589.2	510.2	344.7	215.1	171.6	189.7	249.6	342.2	452.4	564	651.6	667.6	608.8	469.8	292	150.3	73.48	39.44	26.21	22.07	18.86	17.33	15.14	13.18	14	20.67	25.97	20.09	10.35	5.06	3.78	3.172	5.23	43.15	280.3	746.3	989.9	631.9	184.6	18.72	1.03	1.013	1.094
	410	62.6	108.2	200.7	303.8	424.4	484.7	408.7	275.1	175.5	143.9	156	204.3	280.1	364.3	460	521.9	536.1	492.9	380.6	237.3	123.9	62.98	36.19	25.24	21.21	19.36	17.16	15.79	13.7	12.43	14.03	21.16	24.14	16.93	8.253	4.382	3.424	2.749	4.695	35.97	237	697.8	922.3	597.2	179	19.06	1.028	1.013
	415	51.08	103.1	169.3	254.6	351	394.1	327.2	224.3	142	117.3	128.8	166.7	225.4	291.2	362.2	415.6	427.6	393.4	306.6	193.2	102.6	54.66	32.17	24.31	19.89	18.87	17	15.12	13.97	12.24	11.83	14.44	21.47	22.68	14.23	6.566	4.003	2.858	2.545	4.142	31.18	228.2	648.9	858.9	563.5	172.8	17.29	1.038
	420	36.18	80.99	165.8	229.6	278.1	312.4	268.8	184.4	118.2	96.48	105.4	139.6	182.4	238.6	294.1	332.2	342	314.5	243.8	155.8	84.61	46.02	29.14	22.23	19.55	17.87	16.95	15.49	13.91	12.32	11.39	11.19	15.5	21.24	19.89	10.89	5.295	3.381	2.774	2.395	3.573	30.02	211	606.9	815.7	542	153.3	16.68
	425	31.99	68.24	139.2	217.3	246.3	253.4	213.1	146.9	99.7	80.49	87.88	111.2	150.1	192.8	240.5	271.1	276	250	197.1	125.2	70.84	40.44	26.38	21.28	19.27	18.02	16.72	15.4	13.68	12.52	11.33	10.71	11.36	16.02	20.24	15.83	8.545	4.219	3.006	2.471	2.092	3.39	27.88	200.1	576	782	490.7	151.8
	430	25.81	44.38	111.3	208.3	238.1	214.9	173.3	120.7	81.39	70.15	75.45	92.42	119.8	156.6	191.4	216.3	224.5	202.2	159.8	102.3	58.27	34.64	24.44	19.67	17.58	17.14	15.91	14.92	13.91	12.53	11.68	11.09	10.08	11.59	16.39	18.54	12.93	6.452	3.491	2.678	2.194	1.986	3.163	26.54	186.3	552.6	720.1	485.5
	435	18.4	38.56	84.5	192	234.6	195.9	143.8	102.1	64.92	58.25	63.7	79.03	102.3	127.7	156.3	176.2	180.2	164.5	130.5	84.52	50.31	30.89	22.02	18.51	17.09	16	15.48	14.84	13.43	12.67	11.88	10.61	10.32	9.737	11.53	15.98	16.26	10.35	4.993	3.039	2.351	1.961	1.785	3.028	24.95	181.1	518	716.1
	440	19.88	30.37	63.41	152.1	240.5	211.3	130.7	84.48	59.04	49.29	55.34	65.63	84.08	106.9	127	141.9	147.2	132.5	105.8	69.66	42.49	27.16	20.18	17.09	16.39	15.58	14.37	14.03	13.54	12.72	11.65	10.92	10.09	9.67	9.078	11.64	15.45	13.61	7.948	3.917	2.542	2.094	1.755	1.748	2.838	24.59	175.3	517.7
	445	18.02	28.5	45.94	106.8	235.2	239.1	134	70.37	50.5	41.99	46.25	56.6	69.39	87.96	104.8	117.2	119.7	107.6	88.46	59.69	36.3	23.61	18.19	16	15.05	14.38	13.88	13.22	12.85	12.01	11.1	10.64	10.17	9.412	8.624	8.578	11.31	14.08	11.15	6.059	3.202	2.298	1.901	1.63	1.505	2.757	24.73	174.9
	450	12.53	24.37	36.86	68.81	194.9	282.8	186	79.11	40.46	36.4	37.8	48.17	59.79	73.48	86.74	96.2	95.14	88.84	71.92	48.49	31	20.65	16.36	13.99	13.68	13.27	12.87	12.4	11.96	11.31	10.57	9.976	9.431	9.074	8.025	7.495	7.94	10.88	12.39	8.862	4.689	2.653	2.049	1.686	1.504	1.395	2.605	23.71
	455	10.11	20.02	37.13	54.51	138.6	294.6	272	118.6	39.13	32.68	34.12	41.61	49.28	60.49	70.79	77.97	78.88	73.85	57.9	41.05	25.82	18.6	14.98	13.06	12.66	12.57	12.31	11.38	11.38	10.84	10.26	9.952	9.285	8.806	7.982	7.121	6.457	7.65	10.57	10.79	7.261	3.657	2.257	1.835	1.551	1.401	1.274	2.558
	460	8.731	17.76	28.46	43.14	85.88	258.4	375.5	219.6	61.84	28.13	29.72	34.48	41.91	50.55	57.11	64.83	64.19	59.56	46.77	33.57	22.47	16.6	13.51	12.27	11.74	11.5	11.13	10.76	10.39	10.13	9.362	9.445	9.056	8.446	7.964	6.762	6.067	5.351	7.267	9.59	9.157	5.321	2.708	1.847	1.635	1.519	1.326	1.244
	465	9.286	15.23	22	35.32	55.83	168.5	423.9	358.3	134.8	32.69	25.29	28.97	35	41.89	48.9	52.31	53.01	49.48	39.39	27.9	18.55	14.59	12.31	11.21	10.68	10.48	10.04	10.02	9.559	9.376	9.072	8.822	8.549	7.914	7.754	6.651	5.746	5.028	5.075	7.019	8.941	7.314	4.103	2.244	1.74	1.519	1.264	1.263
	470	7.016	11.99	19.58	32.22	44.75	85.71	354.5	506.9	275.9	62.88	23.1	26.26	30.54	35.27	39.91	43.54	43.43	40.01	32.77	23.38	16.46	12.27	10.77	10.48	9.638	9.524	9.008	9.175	8.911	8.503	8.443	7.907	7.955	7.348	7.212	6.393	5.51	4.84	4.156	4.704	6.688	7.517	5.867	3.073	1.7	1.487	1.271	1.273
	475	5.642	11.55	15.43	28.39	37.98	50.29	213.6	540.6	441.4	150.4	25.88	21.64	25.59	30.14	34.1	36.78	36.21	33.44	27.31	20.38	14.26	11.09	9.599	8.816	8.872	8.385	8.367	8.341	7.997	7.777	7.625	7.393	7.447	6.764	6.49	5.879	5.298	4.592	4.012	3.829	4.414	6.5	6.861	4.725	2.591	1.66	1.369	1.236
	480	6.737	9.767	11.35	22.24	34.48	37.56	94.74	404.1	560.6	306.3	56	20.84	22.23	25.28	29.17	31.99	31.31	27.96	23.49	17.17	13.01	9.821	8.656	8.337	8.278	7.453	7.745	7.764	7.517	7.219	7.014	7.061	6.842	6.688	6.238	5.508	4.88	4.28	3.949	3.435	3.302	4.439	6.444	5.915	3.7	1.99	1.407	1.18
	485	3.439	7.968	11.47	18.33	30.24	35	39.83	226.2	554.4	460.2	149.1	24.87	20.53	22.08	25.52	27.57	28.05	25.22	19.99	15.46	11.4	9.223	7.994	7.698	7.385	7.272	7.046	7.2	6.889	6.691	6.524	6.642	6.54	6.246	5.869	5.34	5.095	4.611	3.66	3.282	3.171	3.243	4.702	5.955	5.09	2.832	1.625	1.325
	490	7.108	7.742	9.414	13.21	25.76	33.84	27.35	86.01	407.4	562.5	291	47.65	18.21	20.15	23.08	23.89	24.09	21.64	17.59	13.79	10.29	8.386	7.36	7.043	6.795	6.944	6.809	6.584	6.321	6.399	6.367	6.072	6.009	5.871	5.592	5.278	4.753	4.099	3.623	3.253	3.005	2.739	3.159	4.705	5.566	4.405	2.417	1.548
	495	2.888	5.527	7.671	12.54	18.87	30.04	29.33	34.21	214.1	549.4	437.9	122.5	19.94	19.07	20.46	21.92	22.04	18.55	15.77	11.7	9.144	7.847	6.883	6.529	6.632	6.296	6.29	6.19	6.002	6	5.873	5.8	5.921	5.584	5.417	4.916	4.703	3.902	3.706	3.16	2.972	2.64	2.589	3.428	4.855	5.102	3.577	2.006
	500	2.719	8.239	9.876	10.53	16.35	24.92	31.03	23.1	81.36	405.7	540.9	256.5	40.96	16.89	18.35	18.96	19.13	16.58	13.88	10.8	8.358	6.675	6.422	6.159	5.803	5.826	5.881	5.706	5.907	5.645	5.652	5.585	5.4	5.34	5.06	4.915	4.365	3.993	3.594	3.193	2.791	2.66	2.405	2.518	3.568	4.955	4.635	3.102
[truncated: 13 more columns]

## Sheet: α-amylase+CR
		200	205	210	215	220	225	230	235	240	245	250	255	260	265	270	275	280	285	290	295	300	305	310	315	320	325	330	335	340	345	350	355	360	365	370	375	380	385	390	395	400	405	410	415	420	425	430	435
	200	2.638	1.261	2.15	0.528	0.733	1.068	0.405	0.382	0.227	0.104	0.258	0.366	0.251	0.493	0.525	0.564	0.551	0.612	0.386	0.285	0.224	0.169	0.126	0.163	0.19	0.133	0.131	0.134	0.148	0.178	0.13	0.099	0.14	0.127	0.115	0.142	0.111	0.083	0.112	0.101	0.073	0.09	0.075	0.075	0.067	0.067	0.039	0.06
	205	4.316	5.169	4.268	3.058	1.504	0.403	0.891	0.601	0.135	0.402	0.266	0.314	0.285	0.464	0.413	0.643	0.477	0.453	0.321	0.249	0.207	0.171	0.156	0.136	0.116	0.111	0.136	0.164	0.113	0.109	0.126	0.13	0.138	0.133	0.096	0.109	0.104	0.068	0.094	0.083	0.08	0.069	0.08	0.074	0.084	0.074	0.066	0.05
	210	3.67	7.147	12.42	14.96	5.981	1.61	0.457	0.371	0.275	0.456	0.4	0.359	0.294	0.338	0.465	0.471	0.49	0.477	0.374	0.325	0.18	0.133	0.173	0.128	0.124	0.131	0.145	0.134	0.098	0.112	0.118	0.118	0.125	0.133	0.108	0.117	0.108	0.118	0.066	0.077	0.078	0.086	0.08	0.105	0.086	0.094	0.093	0.07
	215	2.356	5.35	15.67	24.91	18.51	9.551	2.495	0.582	0.276	0.259	0.35	0.363	0.315	0.541	0.514	0.414	0.506	0.415	0.347	0.313	0.246	0.188	0.098	0.134	0.136	0.133	0.139	0.125	0.114	0.121	0.106	0.114	0.122	0.153	0.116	0.114	0.11	0.078	0.078	0.091	0.081	0.053	0.083	0.081	0.08	0.096	0.11	0.099
	220	2.385	3.276	14.2	30.04	44.84	37.48	15.94	3.759	0.294	0.309	0.46	0.274	0.357	0.556	0.511	0.538	0.654	0.445	0.345	0.261	0.225	0.232	0.148	0.121	0.123	0.15	0.133	0.14	0.122	0.148	0.115	0.102	0.099	0.13	0.159	0.094	0.153	0.079	0.083	0.111	0.089	0.071	0.067	0.078	0.086	0.086	0.127	0.184
	225	0.963	1.354	5.296	20.4	59.36	85.2	71.17	30.86	6.104	0.347	0.292	0.221	0.43	0.501	0.385	0.814	0.711	0.398	0.365	0.257	0.202	0.174	0.206	0.129	0.19	0.192	0.157	0.154	0.096	0.137	0.16	0.116	0.133	0.116	0.142	0.143	0.124	0.09	0.106	0.077	0.091	0.067	0.089	0.086	0.074	0.063	0.067	0.132
	230	1.944	1.885	3.012	6.909	43.23	117.9	167.8	140.2	58.4	9.091	0.421	0.562	0.483	0.626	0.743	0.652	0.648	0.513	0.385	0.331	0.263	0.204	0.196	0.129	0.159	0.135	0.136	0.148	0.164	0.131	0.155	0.132	0.116	0.123	0.133	0.133	0.115	0.126	0.118	0.092	0.076	0.065	0.092	0.066	0.073	0.064	0.077	0.078
	235	1.207	0.97	2.047	3.436	14.27	78.52	216.3	313.3	235	88.75	11.04	0.819	0.74	0.633	0.657	0.822	0.524	0.464	0.501	0.39	0.31	0.172	0.188	0.207	0.134	0.154	0.141	0.166	0.124	0.14	0.127	0.137	0.123	0.106	0.123	0.1	0.108	0.129	0.088	0.117	0.092	0.08	0.058	0.065	0.05	0.074	0.081	0.087
	240	2.224	1.764	1.362	2.642	6.605	22.87	130.3	339.9	459.3	322.7	104.3	9.135	0.766	0.732	0.705	0.754	0.705	0.647	0.589	0.391	0.259	0.28	0.188	0.222	0.187	0.169	0.153	0.16	0.116	0.137	0.148	0.134	0.139	0.123	0.101	0.123	0.098	0.147	0.118	0.119	0.079	0.081	0.077	0.065	0.087	0.074	0.069	0.082
	245	2.158	1.628	2.234	1.25	6.099	10.26	33.7	179.8	455.1	585.1	374.7	103.2	8.304	0.835	0.736	0.865	0.716	0.742	0.573	0.345	0.296	0.214	0.214	0.185	0.202	0.174	0.168	0.177	0.13	0.143	0.136	0.137	0.16	0.135	0.129	0.18	0.105	0.088	0.094	0.088	0.088	0.085	0.06	0.064	0.079	0.058	0.082	0.069
	250	1.101	2.088	1.125	1.651	3.321	8.269	13.17	36.75	213.9	529	695.7	412.4	104.7	7.148	1.121	0.957	0.852	0.62	0.478	0.417	0.257	0.322	0.225	0.225	0.194	0.192	0.159	0.16	0.166	0.137	0.126	0.179	0.13	0.116	0.138	0.117	0.112	0.066	0.103	0.117	0.101	0.085	0.084	0.067	0.085	0.074	0.068	0.085
	255	2.864	1.789	0.857	1.212	2.519	5	10.47	16.07	40.69	226	604.8	782.6	465.3	104.7	5.85	1.207	0.895	0.718	0.734	0.615	0.335	0.313	0.23	0.204	0.218	0.164	0.177	0.155	0.123	0.13	0.175	0.161	0.142	0.15	0.153	0.132	0.116	0.102	0.118	0.084	0.105	0.094	0.066	0.098	0.062	0.062	0.059	0.061
	260	3.091	3.403	0.966	2.892	1.57	3.14	6.477	12.44	17.89	38.59	244.6	696.3	916.7	516.9	103.3	5.217	1.32	1.072	0.79	0.545	0.44	0.287	0.26	0.212	0.199	0.226	0.216	0.18	0.172	0.122	0.126	0.181	0.161	0.176	0.142	0.177	0.123	0.129	0.115	0.122	0.104	0.102	0.08	0.081	0.063	0.062	0.082	0.067
	265	1.73	3.866	4.23	4.286	3.311	2.437	2.727	8.386	16.55	18.77	36.31	268.3	806.7	1035	559.9	100.5	5.136	1.131	0.913	0.71	0.476	0.311	0.322	0.167	0.275	0.217	0.185	0.198	0.158	0.134	0.159	0.136	0.151	0.15	0.148	0.15	0.108	0.122	0.114	0.119	0.088	0.097	0.089	0.096	0.093	0.087	0.072	0.06
	270	4.284	5.396	8.082	6.958	5.838	2.576	2.07	2.911	10.47	20.41	19.96	38.46	300.2	903.7	1182	601.5	102.1	4.775	1.019	0.757	0.572	0.371	0.358	0.365	0.266	0.226	0.233	0.231	0.187	0.143	0.164	0.18	0.195	0.166	0.137	0.195	0.128	0.129	0.079	0.132	0.094	0.093	0.099	0.082	0.103	0.098	0.08	0.087
	275	5.778	12.06	16.05	13.05	12.61	9.898	5.639	3.635	4.845	14.77	24.84	22.9	43.35	317.9	1017	1303	689.9	99.19	5.179	0.962	0.708	0.579	0.412	0.335	0.256	0.267	0.253	0.243	0.173	0.17	0.171	0.178	0.194	0.163	0.149	0.171	0.139	0.169	0.145	0.142	0.14	0.095	0.11	0.091	0.108	0.108	0.094	0.098
	280	11.82	20.16	27.96	37.31	49.35	49.91	32.89	17.32	9.114	10.6	26.63	42.72	44.37	71.16	396.2	1173	1496	711.1	106.3	4.982	0.889	0.69	0.545	0.384	0.345	0.284	0.324	0.236	0.233	0.184	0.207	0.205	0.184	0.183	0.15	0.186	0.139	0.166	0.119	0.128	0.134	0.114	0.12	0.117	0.121	0.139	0.138	0.16
	285	20.67	38.04	53.82	97.51	147.4	157.8	124	62.07	28.18	21.34	35.98	69.66	112.6	145.4	202.1	563.7	1422	1643	808.7	111.9	5.031	0.929	0.635	0.466	0.471	0.416	0.334	0.252	0.274	0.237	0.221	0.219	0.199	0.165	0.165	0.173	0.163	0.155	0.15	0.168	0.15	0.156	0.155	0.171	0.225	0.202	0.262	0.295
	290	40.22	66.21	105.9	193.5	302.9	360.8	284.5	146.4	61.65	42.59	63.73	117.3	206.7	306.6	381.4	438.4	773.3	1585	1844	865.3	121	4.995	0.896	0.643	0.532	0.466	0.445	0.365	0.355	0.231	0.245	0.249	0.224	0.198	0.21	0.182	0.189	0.168	0.194	0.173	0.192	0.226	0.218	0.203	0.267	0.338	0.447	0.53
	295	62.33	99.28	162	285.3	459.6	571	451.4	248	105.2	67.49	96.34	171.7	299.7	466	617.8	662.4	592	802.9	1677	1919	910.3	127.6	4.591	1.042	0.737	0.615	0.522	0.382	0.325	0.354	0.26	0.291	0.296	0.215	0.23	0.195	0.2	0.239	0.279	0.264	0.23	0.311	0.266	0.321	0.395	0.53	0.638	0.803
	300	75	114.7	206.5	352.4	588.6	722.2	596	332.1	145.8	90.97	126.1	224	375.3	584.6	797.2	881.6	753.4	490.1	716.7	1707	1984	959.3	132.2	4.522	1.059	0.827	0.664	0.518	0.394	0.354	0.342	0.368	0.287	0.276	0.277	0.242	0.228	0.271	0.285	0.282	0.319	0.303	0.324	0.391	0.466	0.529	0.77	0.942
	305	79	118.9	217.3	378.9	630.7	805.1	699.4	397.9	179.4	113.9	148.3	255.4	425.8	653.1	897.1	1018	896.9	580	305.1	661.6	1734	2044	964.3	141.1	4.643	1.059	0.868	0.733	0.628	0.485	0.411	0.384	0.325	0.311	0.303	0.229	0.263	0.277	0.295	0.299	0.31	0.345	0.346	0.403	0.49	0.622	0.822	1.133
	310	82.16	123.2	216.6	412.7	658.8	820.8	731.4	430.2	207.5	137	177.8	288.5	464	702.6	950.7	1096	1011	695.1	361.5	204.3	625.6	1748	2046	1011	159.3	4.833	1.071	0.795	0.757	0.582	0.425	0.409	0.39	0.337	0.311	0.304	0.282	0.251	0.278	0.311	0.353	0.401	0.4	0.471	0.549	0.653	0.82	1.151
	315	88.83	126.7	221.1	416	645.6	893.2	745.3	459.7	244.9	168	205.9	319	503.7	745.7	991.5	1138	1098	824	486.5	238.6	148.8	608.9	1721	2127	1097	178.7	5.558	1.137	0.878	0.647	0.593	0.485	0.394	0.398	0.357	0.311	0.266	0.288	0.252	0.318	0.354	0.379	0.377	0.464	0.596	0.668	0.914	1.205
	320	86.6	142.9	233.3	427.7	660.7	855.8	771.2	487.8	271.1	196	239.7	362.9	551.3	795.7	1050	1202	1177	957.1	628	332.7	151.9	107.6	583.1	1784	2244	1114	193.5	5.925	1.129	0.85	0.635	0.563	0.536	0.413	0.449	0.332	0.281	0.306	0.3	0.338	0.343	0.408	0.398	0.462	0.562	0.714	0.888	1.254
	325	84.71	136.9	250.9	435.9	687.9	898.3	798.3	525	307.4	229.3	277.2	404.8	602	843	1107	1278	1271	1071	762.6	439.3	202	80.34	77.86	607.8	1880	2233	1134	209.5	6.973	1.107	0.929	0.775	0.639	0.49	0.416	0.393	0.341	0.322	0.298	0.334	0.358	0.429	0.45	0.462	0.526	0.765	0.927	1.231
	330	89.64	151.3	275.1	455.6	716.1	873.3	811.4	548.3	331.4	255.6	308.4	442.8	654.3	897.2	1169	1341	1361	1181	872.7	524.7	250.7	98.04	36.97	70.01	637.5	1836	2212	1178	230.2	8.565	1.126	0.993	0.722	0.638	0.451	0.421	0.347	0.311	0.286	0.378	0.36	0.406	0.45	0.499	0.579	0.758	0.966	1.238
	335	83.73	140	268.2	462.4	725	890.4	833.1	570.9	353.9	285.5	330.7	479.3	678.3	950.1	1202	1393	1422	1272	948.8	577.4	291.8	123.6	43.46	20.91	71.13	621.1	1809	2233	1201	250.8	9.766	1.238	0.888	0.732	0.568	0.448	0.445	0.41	0.351	0.334	0.341	0.475	0.495	0.583	0.656	0.783	1.059	1.253
	340	79.57	144.7	255.9	481.9	702.2	913.7	821.4	575	354.4	298.7	345.9	496.3	706.8	966.7	1232	1415	1458	1321	1002	608.1	312.3	144	57.65	22.21	15.38	69.75	608.4	1813	2234	1246	262.4	11.56	1.298	0.936	0.716	0.607	0.49	0.382	0.352	0.339	0.4	0.445	0.499	0.527	0.702	0.816	1.055	1.313
	345	79.79	144	271.5	455.6	716	868.5	812.6	570	365.6	297.1	349.5	497	701.3	960.7	1220	1410	1449	1323	1009	621.1	309.2	148.3	70.98	31.05	14.36	12.91	70.91	611.9	1767	2252	1267	285	14.32	1.233	0.906	0.69	0.569	0.454	0.422	0.371	0.437	0.486	0.49	0.525	0.667	0.751	1.067	1.344
	350	81.8	138.3	254.6	453.8	670.9	843.8	783.2	545	358.7	291.4	348.7	482.1	680.7	924.4	1178	1353	1410	1289	999.4	611.1	303.7	140.6	74.94	44.11	21.93	11.25	12.05	72.64	592.5	1768	2260	1315	313.2	16.59	1.365	0.915	0.684	0.637	0.501	0.461	0.441	0.474	0.471	0.585	0.642	0.781	1.041	1.273
	355	77.76	134.2	234.1	438.3	615.1	800.8	722.6	510	333.8	280.6	331.5	462.6	648.8	876.5	1106	1274	1337	1239	964	592.2	296.9	133.7	69.31	49.91	34.14	18.11	10.96	12.34	71.35	577.4	1777	2320	1414	343.3	20.12	1.42	0.943	0.64	0.602	0.524	0.474	0.46	0.457	0.564	0.661	0.781	1.02	1.186
	360	65.47	123.2	226.4	388.4	613.1	715.9	670.8	482.9	321	266.2	315	438.6	619.6	822	1037	1198	1244	1152	902	560.4	283.1	130.8	64.46	47.09	42.06	29.77	16.72	11.61	13.04	71.78	593.1	1806	2434	1446	363.6	22.32	1.339	0.837	0.665	0.536	0.554	0.493	0.473	0.513	0.64	0.802	0.964	1.14
	365	68.18	108.8	207.2	374.7	557.3	666.7	618.5	447.3	296.3	247.8	295.4	406.2	555.5	750.6	947.9	1086	1132	1050	824.3	515	267.1	128	64.71	42.37	42.5	40.95	28.04	16.46	11.99	13.79	77.36	610.3	1918	2443	1489	375.4	24.03	1.225	0.798	0.65	0.586	0.544	0.548	0.534	0.601	0.692	0.925	1.121
	370	59.71	97.7	187.4	325	488.9	599.2	541.4	386.7	259.9	228	265.5	363.2	506.1	677.8	836.1	965.2	1012	939.4	742.7	469.4	245	121.4	65.69	43.52	39.32	42.82	40.04	27.28	16.9	12.91	14.64	80.79	656.8	1875	2455	1494	369.9	25.63	1.172	0.814	0.717	0.606	0.517	0.565	0.603	0.732	0.83	1.013
	375	55.2	84.4	159.5	277.9	429	504.5	466.3	334	235.1	201.5	238.4	325.3	447	596.6	739	849.4	891.8	832.3	660.4	419	223.9	115.8	66.64	46.61	38.69	40.23	44.75	39	26	17.5	13.52	14.79	88.27	636.6	1875	2449	1432	373.7	25.84	1.168	0.869	0.752	0.576	0.629	0.595	0.644	0.697	0.964
	380	47.18	78.2	133.7	244	386.7	445	404.9	300	208.6	186.7	211.2	287.9	392.5	514.4	640	730.1	768.8	719.1	575.9	370.4	203.4	111.6	67.79	50.39	43.39	39.91	42.16	46.69	38.13	24.18	16.67	13.3	14.81	84.4	625.9	1854	2313	1407	352.5	26.79	1.258	0.81	0.792	0.613	0.577	0.58	0.744	0.805
	385	40.27	62.18	122.6	212.8	324.6	381.8	358.2	260.9	185.2	163.6	188.6	254.5	338.6	443.6	547	630	656	619	496.2	320.1	182.5	105.1	68.99	54.04	47.51	42.91	41.64	45.4	45.22	34.87	22.53	16.08	12.66	13.98	82.7	623.4	1717	2223	1303	350.9	32.12	1.231	0.813	0.641	0.59	0.66	0.648	0.773
	390	32.53	55.06	104.7	174.8	266.5	328.9	294.8	222.8	160.9	143.7	166.2	217.6	288.1	383.2	463.5	529.9	557.4	527.8	420.7	280.4	163.2	97.78	69.15	57.4	52.11	47.82	44.16	43.47	45.83	43.42	31.82	20.93	15.16	11.43	12.84	84	573.6	1666	2085	1293	395.6	34.75	1.221	0.744	0.685	0.657	0.693	0.731
	395	33.36	48.97	87.94	155.7	234.4	274.2	258.3	191.9	140.5	126.7	146.7	188.8	247.9	323.5	393.2	450.1	471	443.6	356.5	242.3	145.6	94.41	69.75	59.9	55.8	51.8	48.47	44.47	43.59	45.14	41.3	29.27	19.47	14.05	11.15	12.75	76.29	564.8	1564	2023	1373	379.7	35.64	1.231	0.865	0.708	0.691	0.699
	400	30.61	41.15	71.65	128.4	191.1	226.2	213.8	165.6	128.4	113.4	129.2	166.9	214.7	275.6	332.1	379.6	395.1	375.2	305.2	210.5	132.8	89.35	70.14	63.03	58.54	55.93	51.53	47.63	44.21	43.22	44.6	38.86	26.65	18.3	13.83	10.68	12.4	79.26	537.3	1492	2028	1239	386.8	31.72	1.212	0.767	0.701	0.72
	405	27.48	41.82	66.69	112.2	165.2	193.9	178.6	143	113	103.3	116.8	141	183	231.9	278.3	317.5	329.9	315.5	259.5	182.5	119.4	86.67	70.79	64.25	62.38	59.44	55.72	51.79	46.24	42.42	43.93	44	35.76	25.05	18.09	13.87	11.25	13.1	73.71	488	1431	1825	1304	341.1	35.66	1.246	0.792	0.782
	410	21.17	42.24	63.27	95.47	133.5	164	158.7	124.2	99.39	91.77	102.9	126.1	157.1	197.8	233.4	267	275.9	264.1	221	159.6	107.4	82.69	69.89	66.39	63.83	61.92	58.59	54.14	49.54	44.88	43.59	43.88	43.31	34.1	23.88	17.8	13.97	11.22	12.7	65.11	456.5	1283	1936	1112	344.2	34.92	1.216	0.829
	415	18.82	32.98	57.05	80.98	111.4	139.1	129.3	107.1	91.95	83.4	92.59	112.5	136.8	167.4	199.1	223.9	233.1	222	190	140	100.8	79.59	70.4	65.9	65.23	64.32	60.74	56.85	52.3	48.33	44.82	43.07	44.95	42.48	32.22	23.36	17.73	14.2	11.18	12.37	63.63	421.5	1381	1610	1096	324.2	31.69	1.264
	420	18.27	33.63	57.3	86.66	102.1	119.5	109.5	93.65	86.56	80.71	85.24	99.95	120.6	145.7	171.3	187.3	194.8	188	162	123.9	93.13	75.83	70.27	67.51	65.71	64.31	62.52	59.18	55.71	51.42	47.3	44.26	44.71	46.89	41.43	31.1	22.23	17.82	13.79	11.17	12.33	59.07	449.5	1144	1591	1016	299.8	32.64
	425	13.86	25.16	57.31	77.77	96.3	102.5	97.54	85.23	74.29	77.32	77.49	91.44	106.4	127.3	145.2	162.5	168	161.8	141.9	111.6	87.57	74.59	69.64	67.9	67.05	65.91	64.29	61.07	57.92	54.71	51.2	47.8	45.66	45.92	46.97	39.77	29.08	21.99	17.88	14.42	11.68	11.95	61.68	379.4	1116	1464	956.7	300.7
	430	12.27	21.29	46.26	78.29	85.98	88.97	86.38	79.07	72.37	74.26	76.19	84.45	95.66	112.6	131.1	143.9	147.2	142.2	125	101.5	82.46	73.08	70.1	68.44	67.55	66.57	65.68	62.92	60.25	57.49	54.66	51.62	49.31	47.97	49.39	46.55	38.28	28.81	22.21	18.72	14.99	11.83	12.33	54.47	367.4	1037	1414	975.7
	435	14.25	17.74	37.24	69.43	89.83	87.47	80.34	72.17	71.12	69.08	74.21	79.91	89	103.5	116.4	126.7	128.7	126.2	114.8	95.49	78.92	72.73	70.45	68.03	67.48	67.96	67.43	65.72	63.65	60.33	58.58	55.96	54.1	52.21	50.63	50.62	46.43	37.19	28.64	23.11	19.27	15.85	12.44	12.2	53.06	338.5	1012	1428
	440	13.41	15.42	29.02	58.76	89.79	88.07	75.64	69.37	67.05	67.62	69.48	73.07	85.42	95.94	105.3	113.4	118.1	112.8	104.2	89.67	76.46	70.74	70	68.95	67.76	68.36	68.44	67.13	65.33	63.54	62.01	59.98	58.48	56.41	53.6	52.33	50.61	45.72	36.3	28.84	24.42	19.94	16.12	12.46	12.37	50.18	343.6	1034
	445	12.35	14.26	30.9	48.81	89.06	99.11	78.34	67.56	62.08	64.66	67.69	71.69	79.64	88.94	97.59	103.9	104.9	102.3	96.95	84.02	74.14	69.07	67.25	67.36	68.47	68.43	68.29	67.3	67.43	65.26	64.72	63.12	63.03	61.31	57.83	55.18	53.5	51.01	45.1	36.32	29.8	24.4	20.14	16.01	12.75	12.2	51.56	349.5
	450	12.93	13.34	22.56	38.45	73.36	116.3	92.98	68.25	59.99	63.14	66.1	69.88	75.73	80.43	90.54	93.77	98.52	96.48	89.4	79.51	72.95	67.17	66.74	66.46	66.92	67.07	68.57	67.6	66.88	66.47	66.46	65.53	64.97	64.32	62.17	58.64	54.89	53.28	50.55	43.28	35.84	29.41	23.86	19.78	15.68	12.02	11.58	51.61
	455	15.47	15.71	21.05	34.91	57.27	116.7	120.4	80.05	62.79	58.78	62.61	67.38	71.99	78.38	82.64	87.54	88.88	88.58	82.89	75.3	69.55	66.54	64.52	64.91	64.83	65.23	67.51	66.99	66.78	67.09	67.68	67.15	67.8	67.8	65.09	61.33	57.6	54.64	52.98	48.94	41.75	33.77	28.29	22.96	18.34	13.93	10.55	10.59
	460	10.6	14.51	20.34	27.6	41.2	111.8	149.3	105.5	65.7	59.35	59.8	63.42	68.72	73.04	79.56	83.74	85.48	83.44	78.05	72.53	66.79	63.45	62.99	62.46	63.87	64.46	64.98	65.81	66.11	66.22	67.13	67.35	67.58	68.17	66.85	63.68	59.36	55.92	53.05	51.1	46.44	39.09	31.7	25.97	20.56	16.09	12.44	9.253
	465	11.39	11.69	18.87	22.78	34.15	77.09	176.6	160.1	90.9	60.37	58.84	60.9	64.74	69.32	73.8	77.91	78.84	76.96	73.74	68.21	64.12	61.17	61.48	60.29	60.38	61.68	62.11	62.69	63.87	65.22	65.56	67.28	67.9	67.84	67.6	64.65	60.77	56.24	53.2	51.21	48.57	42.73	35.02	28.09	22.5	17.76	13.73	10.42
	470	15.6	12.85	15.96	25.19	30.25	53.16	156.2	218.3	140.5	68.06	56.5	56.82	62.12	65.68	69.15	71.27	74.89	72.95	69.06	63.75	61.08	59.07	56.85	57.88	56.88	57.87	59.46	60.18	61.19	62.46	63.03	65.26	66.06	67.14	66.32	63.31	60.46	56.48	52.42	49.61	47.23	43.91	37.23	30.16	24.03	19.02	14.98	11.26
	475	8.99	11.78	15.9	19.39	27.13	35.18	107.5	236	205.9	101.9	53.87	55.68	58.97	62.95	64.54	69.9	69.6	67.75	65.23	61.23	58.01	55.16	55.37	54.26	54.8	55.68	56.04	57.57	59.53	59.28	61.12	62.61	63.75	64.53	65.04	61.93	59.38	55.68	51.63	48.34	45.61	43.22	38.93	31.89	25.14	19.66	15.43	12.34
	480	9.006	11.17	13.72	21.29	27.3	30.52	61.4	186.5	264.4	171.2	63.8	52.21	56.05	58.81	61.57	64.69	65.45	64.78	62.16	57.73	55.19	53.33	53.15	51.45	52.11	52.08	53.84	54.45	56.2	57.83	59.14	60.12	61.66	62.65	62.94	61.16	58.3	54.71	50.59	47.55	44.03	40.63	38.35	33.55	26.42	20.71	15.92	12.91
	485	7.011	12.04	13.4	18.57	26.29	28.59	38.02	120.4	276.7	244.5	101	50.62	51.62	56.25	59.44	62.26	61.94	61.69	57.53	55.97	52.1	51.76	50.89	49.93	49.82	50.12	51.43	52.13	53.38	55.23	56.89	58.01	59.88	61.53	60.82	59.78	56.41	53.51	49.4	46.71	43.92	39.95	36.63	33.64	28.19	22.26	17.21	13.89
	490	8.189	7.9	11.14	18.32	23.23	28.64	34.31	63.27	211.7	297.8	173.6	59.2	51.24	54.06	58.46	59.28	59.92	57.47	56.07	52.45	50.47	48.97	48.25	47.28	47.82	47.87	49.01	50.62	51.05	53.47	54.55	55.7	57.3	59.41	58.72	56.79	54.74	52.08	49.07	45.73	42.26	38.84	35.41	32.36	29.02	24.15	18.49	14.84
	495	9.003	10.23	12.69	16.62	21.56	29.1	29.38	40.33	127.1	289.7	252.4	96.88	49.68	52.77	55.33	58.79	56.99	54.33	52.12	48.69	47.99	46.32	45.61	45	43.82	44.84	45.89	47.12	48.9	49.99	51.43	53.27	55.28	55.99	56.34	54.2	52.11	49.96	46.47	43.94	41.34	37.47	33.99	30.56	28.26	25.02	20.42	16.04
	500	7.213	7.921	13.55	12.64	17.77	21.87	31.38	33.09	63.82	224.7	312.3	163.6	56.15	49.1	51.44	54.87	54.33	51.19	48.51	46.15	43.21	42.79	42.48	42.23	42.38	42.1	43.02	44.27	45.79	47.51	48	49.98	51.2	52.65	53.01	51.54	48.82	47.24	44.35	41.8	38.78	35.75	32.22	29.12	26.59	24.34	21.7	17.59
[truncated: 13 more columns]

## Sheet: α-amylase+CT
		200	205	210	215	220	225	230	235	240	245	250	255	260	265	270	275	280	285	290	295	300	305	310	315	320	325	330	335	340	345	350	355	360	365	370	375	380	385	390	395	400	405	410	415	420	425	430	435
	200	2.112	1.59	1.496	1.082	0.543	0.833	0.304	0.596	0.174	0.398	0.256	0.359	0.292	0.256	0.301	0.274	0.168	0.254	0.243	0.216	0.134	0.171	0.158	0.096	0.115	0.146	0.126	0.079	0.119	0.133	0.114	0.132	0.112	0.069	0.094	0.103	0.094	0.095	0.109	0.079	0.117	0.068	0.086	0.06	0.059	0.061	0.075	0.072
	205	3.509	1.642	2.403	2.161	1.008	0.778	0.502	0.4	0.3	0.629	0.446	0.382	0.274	0.288	0.325	0.3	0.312	0.266	0.213	0.147	0.149	0.125	0.143	0.113	0.135	0.112	0.081	0.145	0.111	0.118	0.097	0.118	0.126	0.116	0.114	0.08	0.109	0.072	0.105	0.073	0.083	0.076	0.073	0.077	0.077	0.067	0.06	0.047
	210	3.724	5.167	5.085	5.339	2.767	1.494	0.733	0.619	0.359	0.582	0.4	0.396	0.327	0.499	0.348	0.259	0.274	0.356	0.2	0.113	0.162	0.155	0.135	0.141	0.103	0.103	0.124	0.115	0.113	0.102	0.079	0.141	0.124	0.107	0.141	0.117	0.109	0.103	0.093	0.089	0.088	0.06	0.089	0.062	0.079	0.089	0.087	0.077
	215	2.135	3.298	7.89	10.86	8.932	4.454	0.788	0.775	0.491	0.435	0.535	0.35	0.351	0.387	0.37	0.249	0.292	0.285	0.228	0.181	0.152	0.154	0.162	0.11	0.126	0.082	0.129	0.141	0.096	0.12	0.138	0.119	0.089	0.112	0.127	0.1	0.087	0.078	0.103	0.097	0.085	0.068	0.071	0.06	0.075	0.08	0.105	0.101
	220	1.253	1.523	4.625	11.47	17.25	16.86	6.511	2.211	0.748	0.562	0.598	0.449	0.585	0.424	0.434	0.39	0.271	0.388	0.246	0.149	0.127	0.15	0.141	0.146	0.178	0.124	0.151	0.134	0.121	0.12	0.109	0.124	0.114	0.107	0.12	0.124	0.105	0.09	0.095	0.086	0.079	0.086	0.092	0.058	0.092	0.077	0.111	0.101
	225	-0.005	0.467	2.485	8.894	18.9	35.91	34.76	17.32	4.477	0.562	0.508	0.654	0.409	0.377	0.451	0.33	0.24	0.293	0.187	0.159	0.135	0.156	0.151	0.164	0.134	0.134	0.114	0.144	0.124	0.126	0.092	0.141	0.122	0.126	0.143	0.107	0.129	0.131	0.122	0.067	0.085	0.073	0.092	0.061	0.09	0.071	0.063	0.108
	230	2.371	1.242	1.899	3.158	19.48	61.57	108.5	114.5	55.94	10.69	0.48	0.684	0.418	0.446	0.38	0.312	0.221	0.325	0.236	0.181	0.215	0.186	0.132	0.133	0.144	0.147	0.154	0.109	0.125	0.127	0.133	0.13	0.168	0.141	0.124	0.104	0.087	0.096	0.105	0.091	0.105	0.07	0.081	0.077	0.088	0.08	0.076	0.064
	235	0.856	2.052	1.599	3.123	7.46	49.73	177.1	322.1	277.5	120.2	16.27	0.864	0.63	0.442	0.37	0.357	0.32	0.304	0.234	0.197	0.221	0.145	0.176	0.168	0.131	0.137	0.126	0.117	0.165	0.115	0.132	0.12	0.121	0.115	0.142	0.113	0.096	0.123	0.08	0.092	0.081	0.07	0.076	0.075	0.069	0.062	0.068	0.076
	240	1.633	2.171	1.992	2.856	4.323	18.68	123.1	425.7	634.1	478.9	158.2	15.3	0.771	0.558	0.428	0.388	0.322	0.384	0.3	0.276	0.205	0.204	0.183	0.182	0.208	0.176	0.156	0.14	0.146	0.122	0.143	0.125	0.134	0.114	0.137	0.106	0.102	0.131	0.126	0.098	0.085	0.094	0.061	0.096	0.066	0.065	0.08	0.078
	245	2.503	1.399	1.252	2.787	5.084	7.116	33.1	247.9	659.8	924	598.6	165.3	12.94	0.71	0.54	0.427	0.436	0.361	0.29	0.28	0.236	0.173	0.168	0.21	0.186	0.155	0.206	0.126	0.161	0.144	0.144	0.147	0.133	0.125	0.122	0.124	0.096	0.13	0.109	0.098	0.116	0.09	0.104	0.077	0.075	0.059	0.067	0.07
	250	0.746	2.073	2.363	2.003	4.053	7.371	14.3	55.33	329.1	856.6	1080	629.8	153.3	9.749	1.027	0.611	0.478	0.409	0.236	0.318	0.181	0.248	0.187	0.175	0.159	0.161	0.154	0.153	0.137	0.149	0.148	0.161	0.162	0.115	0.142	0.136	0.109	0.158	0.101	0.108	0.089	0.109	0.092	0.07	0.076	0.078	0.061	0.088
	255	2.212	2.798	3.25	1.567	1.754	4.844	11.99	18.56	60.32	366.3	922.8	1072	581.3	118.5	5.304	0.749	0.728	0.438	0.377	0.369	0.283	0.221	0.26	0.22	0.177	0.184	0.176	0.18	0.135	0.174	0.115	0.161	0.108	0.103	0.15	0.153	0.102	0.14	0.099	0.087	0.107	0.099	0.105	0.082	0.067	0.09	0.081	0.055
	260	2.242	3.445	1.377	2.576	1.608	2.315	6.405	16.61	23.15	56.31	352.6	865	952.3	468.7	78.68	3.447	0.523	0.493	0.359	0.322	0.29	0.247	0.255	0.166	0.173	0.21	0.175	0.179	0.15	0.152	0.146	0.141	0.146	0.163	0.173	0.133	0.121	0.12	0.093	0.104	0.101	0.093	0.089	0.086	0.068	0.077	0.083	0.074
	265	1.81	3.012	3.278	3.507	1.647	1.823	2.818	8.722	20.73	21.12	48.72	299.7	711.8	767.3	339.7	52.11	2.484	0.666	0.435	0.439	0.347	0.284	0.257	0.212	0.201	0.171	0.202	0.187	0.154	0.193	0.178	0.175	0.143	0.147	0.203	0.167	0.141	0.133	0.092	0.1	0.082	0.107	0.102	0.078	0.078	0.078	0.086	0.072
	270	2.434	2.716	3.92	4.124	3.099	2.08	2.073	2.543	11.71	20.56	19.24	38.18	225.1	549.1	552.9	246.5	36.24	1.986	0.507	0.452	0.369	0.322	0.286	0.229	0.182	0.178	0.203	0.163	0.194	0.13	0.174	0.156	0.124	0.149	0.165	0.144	0.132	0.118	0.109	0.101	0.094	0.092	0.083	0.093	0.073	0.074	0.097	0.082
	275	3.025	3.621	4.59	4.377	5.11	3.581	3.227	2.521	4.161	14.2	21.61	17.84	29.79	165.7	398.3	430.9	192.7	31.59	1.685	0.425	0.331	0.382	0.334	0.29	0.228	0.169	0.208	0.17	0.159	0.167	0.176	0.126	0.175	0.182	0.147	0.134	0.139	0.135	0.126	0.103	0.118	0.095	0.093	0.083	0.068	0.096	0.081	0.086
	280	5.507	5.574	9.407	12.43	12.73	17.18	14.44	8.991	6.292	8.054	20.11	26.87	25.7	34.12	134.5	337.6	382.3	205.8	29.63	1.742	0.539	0.476	0.418	0.35	0.302	0.214	0.218	0.218	0.198	0.159	0.182	0.165	0.149	0.177	0.139	0.163	0.157	0.125	0.102	0.141	0.096	0.105	0.102	0.098	0.083	0.079	0.1	0.091
	285	6.363	10.05	23.38	33.75	46.73	57.69	51.7	32.7	19.51	15.59	26.49	46.73	61.02	66.28	71.79	154.9	351.3	487	229.4	37.32	1.859	0.587	0.4	0.388	0.304	0.3	0.219	0.27	0.235	0.207	0.183	0.166	0.175	0.179	0.185	0.162	0.135	0.157	0.131	0.114	0.096	0.124	0.125	0.132	0.11	0.097	0.166	0.169
	290	18.2	24.46	41.82	68.75	114.6	140.3	133.8	83.88	46.79	36.67	52.68	83.63	122.9	151.3	156	147.9	214.6	484.3	593.1	318.4	54.52	2.431	0.721	0.525	0.349	0.296	0.285	0.224	0.26	0.244	0.198	0.184	0.209	0.144	0.173	0.176	0.148	0.133	0.118	0.14	0.13	0.154	0.126	0.165	0.168	0.162	0.222	0.277
	295	21	36.94	65.64	114.3	181.5	241.4	232.2	155.5	86.52	66.51	91.45	137.6	201.8	261.3	281.6	257	201.5	264	602.2	833.4	464.1	76.49	3.026	0.754	0.564	0.458	0.359	0.347	0.322	0.217	0.259	0.185	0.219	0.176	0.211	0.173	0.163	0.144	0.16	0.146	0.154	0.191	0.158	0.164	0.23	0.243	0.304	0.39
	300	31.75	54.78	99.54	158.5	258.5	347	346.9	247.1	143.7	102.2	132.7	203.1	285.3	367.2	414.8	383.1	299.5	191.5	288	845.9	1161	631.6	99.15	3.511	0.904	0.599	0.563	0.428	0.421	0.323	0.298	0.262	0.205	0.185	0.256	0.175	0.175	0.175	0.199	0.171	0.18	0.22	0.191	0.209	0.286	0.308	0.35	0.492
	305	36.93	62.66	121.9	209.2	317.3	443.2	435.8	329.4	198.2	145.5	178.3	268.4	370.9	469.6	519.3	504.8	408.4	256.9	146.7	363.3	1115	1494	785.6	122.2	3.961	0.843	0.611	0.533	0.401	0.349	0.349	0.321	0.309	0.245	0.271	0.17	0.176	0.211	0.188	0.186	0.191	0.215	0.218	0.268	0.31	0.356	0.499	0.607
	310	42.35	70.02	131.6	234.5	362.7	502.4	522.1	395.4	248.8	191.3	228	324.1	442.2	552.3	601.5	586.5	501.4	339.2	196.3	131	440.4	1377	1766	894.3	141.9	4.572	0.964	0.726	0.55	0.479	0.475	0.276	0.335	0.339	0.307	0.278	0.234	0.233	0.23	0.147	0.215	0.242	0.259	0.309	0.324	0.473	0.513	0.684
	315	42.62	75.22	151.1	246.3	374.7	540.6	554.8	443.5	298.8	239.9	274.1	381.5	498.6	614	666.2	651.2	565.5	426.2	277	160.5	114.7	500	1564	1913	971.8	164.5	5.246	0.927	0.759	0.573	0.542	0.47	0.404	0.353	0.292	0.251	0.226	0.21	0.223	0.231	0.265	0.245	0.271	0.328	0.363	0.483	0.578	0.74
	320	49.49	75.13	156.2	249.1	407.1	546.6	592.1	501.7	347.7	283.4	325.4	435.9	561.9	669.5	713.2	697	615.9	502.9	362.9	224.8	115.6	91.75	545.8	1626	1980	1015	181	5.684	1.038	0.796	0.602	0.55	0.462	0.352	0.369	0.321	0.259	0.277	0.221	0.237	0.229	0.26	0.284	0.33	0.395	0.525	0.66	0.74
	325	52.49	82.24	159.6	258.5	406.6	550.5	602.4	521.6	382.4	324.6	366.7	482.4	612.4	714.6	760.7	742.3	662.8	563.6	441.2	289.5	152.2	67.42	73.19	550.4	1654	2002	1047	193.1	6.484	1.059	0.831	0.674	0.511	0.409	0.418	0.321	0.303	0.31	0.239	0.278	0.273	0.301	0.298	0.381	0.409	0.465	0.657	0.777
	330	46.49	86.05	159	278.2	424.9	560.7	625.1	554.2	416.9	362.8	408.9	531.8	658.2	757.8	793.1	771.8	708.5	615.6	496.1	341	188.9	80.72	32.02	61.85	556.2	1629	2021	1086	212.2	7.885	1.057	0.829	0.712	0.614	0.494	0.449	0.328	0.31	0.243	0.261	0.307	0.313	0.341	0.366	0.432	0.493	0.63	0.828
	335	47.15	94.06	163.8	288.9	398.6	569.6	632.4	567.9	434.6	390.1	435.4	553.3	689.5	783.4	816.8	796.7	735.4	653.3	534.7	373.5	216.6	101	36.46	15.84	60.35	549.6	1641	2078	1114	231.9	9.139	1.103	0.841	0.715	0.594	0.488	0.377	0.339	0.305	0.241	0.239	0.303	0.337	0.358	0.473	0.564	0.658	0.831
	340	41.22	88.05	164.1	283.9	422.3	578.8	621.9	560.4	440.2	393.6	453.6	574.7	706.7	799.4	826.8	804.5	748.2	676.3	564	387.9	228.1	116	47.36	16.45	10.1	60.04	546.9	1688	2082	1170	256.2	10.96	1.133	0.832	0.715	0.564	0.44	0.374	0.352	0.306	0.32	0.301	0.322	0.399	0.454	0.495	0.695	0.804
	345	45.59	80.11	159.5	257.6	417.3	552.9	616.9	557.8	444.2	393.1	452.9	574.7	709.4	795.1	823	798.3	750.1	677.9	568.1	393.5	225	119.5	59.29	24.03	9.025	8.532	61.1	568.1	1664	2121	1239	283.4	14.05	1.324	0.863	0.655	0.541	0.485	0.384	0.326	0.332	0.286	0.33	0.423	0.442	0.553	0.688	0.896
	350	47.55	78.82	145.2	251.2	394.7	529.1	593.2	530.7	423.3	390.4	444.4	562.4	691	776.6	797.4	772.8	724.5	662.7	557.1	386.5	217.7	110.8	61.63	34.66	14.45	6.112	7.829	66.18	557.2	1683	2222	1309	309.9	16.79	1.262	0.87	0.686	0.542	0.445	0.337	0.394	0.335	0.366	0.424	0.482	0.567	0.671	0.734
	355	39.43	79.5	143.9	240.2	369	500.8	540.7	495.6	404	371.6	427.9	532	660.6	742.2	753.5	729.8	684.9	635.3	531.8	370.8	208.2	101.2	53.14	38.22	24.64	10.59	5.263	8.063	64.38	551	1742	2307	1394	340.2	20.76	1.298	0.927	0.701	0.521	0.398	0.423	0.357	0.39	0.381	0.46	0.521	0.605	0.791
	360	47.08	68.51	135	227.6	353.5	448.6	490.1	451.2	381.7	345	394.7	501.8	609.7	677.9	700.2	671.7	634.1	588.2	496.2	344.9	194.4	94.77	44.69	32.17	31.36	20.13	8.43	4.866	7.634	65.68	581.1	1805	2379	1443	367.2	21.73	1.224	0.864	0.724	0.545	0.421	0.441	0.394	0.459	0.479	0.517	0.617	0.793
	365	40.24	59.8	126	214	314.6	405.5	446.7	411.5	340.3	308.2	357.4	457.6	549.8	621.3	633.7	605.7	575.5	529.7	446.7	317.5	180.7	89.3	40.83	24.06	26.64	27.83	16.79	7.161	4.76	7.789	71.75	605.7	1838	2429	1492	366.7	24.16	1.342	0.837	0.589	0.459	0.503	0.455	0.417	0.409	0.492	0.576	0.677
	370	33.74	48.79	103.7	173.9	274.9	352	386.2	366.6	293.9	284.3	324.2	407.4	494.5	545.2	560.4	540	511.4	466.5	399.2	279.5	161.7	80.58	39.38	20.62	18.82	25.83	25.29	14.27	6.203	4.513	7.877	75.77	619.9	1866	2444	1442	371	26.87	1.253	0.793	0.654	0.542	0.498	0.433	0.456	0.456	0.541	0.674
	375	28.81	52.05	102.1	155.8	238.8	306.9	341.4	308.5	260.3	243.6	280	352.1	432.9	479.6	486.4	467.1	437.8	409.6	346.6	243.7	142.8	74.04	36.77	20.57	15.27	19	25.97	23.1	12.22	5.851	4.712	8.553	78.86	632.5	1848	2355	1456	386.9	26.28	1.258	0.806	0.577	0.509	0.433	0.447	0.503	0.551	0.589
	380	29.16	42.31	83.71	137	210.6	270.7	284.7	267.3	232.3	214	245.2	311.1	372.2	408.5	419.9	400.7	377.3	350.1	298.4	211.7	124.2	66.74	34.47	21.16	15	14.67	19.5	26.14	20.47	10.4	5.368	4.704	8.541	79.57	616.6	1780	2355	1459	366.3	28.19	1.111	0.76	0.601	0.541	0.482	0.478	0.502	0.615
	385	26.4	35.95	86.66	113.8	183.6	225.6	244.5	225.4	193	186.3	212.4	262.8	315.3	349.8	351.9	340.9	320.8	297.3	254.5	181.1	109.5	60.72	33.42	21.85	16.83	14.62	15.15	21.94	25.62	18.58	8.811	5.444	4.863	8.836	78.79	600.2	1793	2310	1358	364.8	31.18	1.195	0.778	0.606	0.552	0.486	0.476	0.531
	390	24.33	33.63	63.48	101	154	194.8	201.8	187.8	166.6	155.6	183.9	224.9	264	298.1	296.1	286.1	267.7	252.9	214.5	152.6	94.5	53.83	32.47	23.18	18.43	15.37	14.05	15.97	22.64	24.24	16.05	7.964	5.38	5.046	8.923	78.95	609.2	1736	2165	1336	384.9	35.4	1.169	0.718	0.586	0.579	0.534	0.493
	395	20.85	28.48	49.84	81.43	127.9	157.9	172.8	161	138.5	133.4	151.8	190.5	223.4	245.9	249.9	239.9	223.1	208.7	180	128.9	79.97	48.85	31.73	24.24	20.28	17.41	15.38	14.03	16.56	23.02	22.54	13.65	7.428	5.405	4.91	8.92	79.96	579.2	1616	2077	1332	388.3	34.35	1.173	0.751	0.596	0.556	0.523
	400	24.71	27.92	44.37	74.34	98.42	135.3	141.3	132.6	116.1	112.5	128.6	158	188	205.8	206.3	199.5	183.5	170.1	147	109.4	70.15	44.55	31.34	25.07	21.67	18.89	16.64	14.77	13.49	17.68	23.34	20.57	11.99	6.813	5.499	5.177	9.205	77.91	553.2	1523	1985	1270	360	32.99	1.178	0.773	0.621	0.565
	405	17.53	24.66	35.96	65.18	82.49	107.6	114.9	110.5	98.36	98.11	108.3	132.1	153.7	169.7	166.4	161.6	151.8	142.4	124.6	92.03	62.06	40.97	31.17	26.28	23.35	20.76	18.32	15.43	13.91	13.79	18.64	23.5	19.46	10.89	7.03	5.794	5.407	8.965	73.16	493.3	1380	1871	1210	356.4	36.15	1.178	0.793	0.549
	410	16.88	27.45	30.46	52.86	70.84	86.87	97.1	91.82	84.11	81.34	90.85	109.2	130	137.5	135.9	132.3	123.9	115.5	102.3	77.87	53.55	38.42	31.39	27.07	23.92	22.28	19.48	17.04	14.67	12.77	14.26	19.77	23.33	17.26	10.15	7.063	5.978	5.725	9.119	63.79	437.5	1317	1785	1158	352.8	35.7	1.182	0.71
	415	16.19	19.1	31.82	45.47	59.89	70.41	76.06	78.43	70.83	69.56	79.81	92.37	105.7	112.1	113.5	107.3	99.9	95.27	83.54	65.36	46.87	36.2	31.16	27.75	25.71	22.87	20.69	17.79	15.65	13.43	12.83	15.33	21.74	22.86	16.03	9.486	7.417	6.446	6.33	9.356	58.94	431.5	1264	1678	1124	338.2	33.74	1.176
	420	13.88	18	28.43	37.99	51.74	64.93	69.4	65.54	61.93	59.45	65.87	77	89.72	92.82	94.53	87.45	81.29	77.74	69.62	56.09	42.23	33.69	30.32	28.28	26.45	24.11	21.01	18.18	16.41	14.56	13.37	13.09	17.17	22.51	21.63	14.16	9.734	8.358	7.445	7.226	10.08	59.58	411.1	1191	1620	1061	314.7	34.21
	425	13.8	18.28	28.31	33.07	42.47	52.54	55.75	55.99	54.9	51.9	57.87	66.38	74.49	77.76	76.73	74.08	67.36	63.02	57.78	46.71	37	32.72	30	28.49	26.56	24.12	21.6	18.7	16.46	15.39	14.11	13.32	14.46	19	23.24	20.1	13.52	9.791	9.146	8.393	8.1	10.16	57.07	392.5	1138	1519	1009	316.1
	430	11.15	11.51	24.64	35.09	43.96	43.74	45.92	48.7	45.88	45.98	48.55	55.88	62.14	64.17	61.64	58.44	56.36	52.75	48.36	40.74	33.45	30.6	29.33	28.2	26.61	23.99	21.71	18.92	16.9	15.7	14.64	14.14	14.11	15.46	20.48	23.03	18.47	12.57	10.42	9.551	9.069	8.133	9.707	54.14	368.4	1081	1485	1015
	435	9.697	12.61	20.26	29.86	40.09	38.68	41.78	42.77	40.45	39.9	42.84	48.97	52.81	54.57	53.1	49.13	46.37	43.53	41.15	34.66	30.11	28.37	27.92	27.73	26.3	24.32	21.45	18.83	17.29	16.32	15.11	14.58	14.28	14.49	16.67	21.03	21.71	16.93	12.07	10.59	9.755	8.599	7.27	8.402	50.1	353	1063	1498
	440	10.43	10.11	16.14	25.71	36.21	40.64	35.3	37.05	35.26	35.39	37.96	40.47	44.44	45.26	45.23	41.43	37.81	36.88	35	30.9	27.68	26.71	27.02	26.72	25.62	23.54	21.3	18.89	17.12	16.09	15.19	14.85	14.61	14.47	14.5	17.32	21.41	20.42	14.88	11.42	10.05	8.945	7.348	6.128	7.409	48.58	358.9	1081
	445	9.123	10.08	13.68	21.58	36.42	42.83	33.85	32.15	32.69	32.43	33.84	34.72	38.15	37.9	36.19	33.58	32.06	31.4	29.63	27.05	24.62	24.39	25.13	25.42	24.38	22.24	20.37	18.5	16.77	15.48	15.13	14.7	14.66	14.51	14.14	14.35	17.61	20.12	18.01	13.5	10.26	8.813	7.7	6.216	5.054	6.622	50.53	360.4
	450	8.04	11.32	14.58	17.12	29.75	44.16	35.94	29.04	27.24	29.15	29.08	32.31	31.89	32.3	31.18	28.24	26.26	25.88	25.33	22.68	22.22	21.73	22.78	23.16	22.7	20.91	19.48	17.57	15.85	15.11	14.97	14.28	14.25	14.31	13.79	13.22	14.09	16.66	18.5	15.5	11.44	9.055	7.669	6.522	5.24	4.474	6.413	49.18
	455	6.94	6.793	13.13	13.72	24.73	49.4	48.81	34.05	25.05	25.41	25.13	27.54	28.07	27.36	25.38	24.14	22.35	21.42	20.58	19.91	19.32	20.35	21.71	21.11	21.08	19.49	18.21	16.66	15.33	14.42	14.02	14.29	13.71	13.95	13.14	12.61	12.6	13.55	16.39	16.72	13.49	9.588	7.566	6.699	5.441	4.501	3.745	5.92
	460	7.27	9.598	10.68	13.4	18.8	46.93	76.21	53.17	28.9	22.96	22.37	24.2	24.2	23.71	21.82	20.65	18.28	17.89	18.07	17.3	17.72	18.44	19.06	19.47	19.11	18.42	16.71	15.27	14.17	13.59	13.16	13.31	13.17	13.15	12.74	12.04	11.34	11.18	13.09	15.41	14.87	11.17	8.286	6.579	5.598	4.447	3.788	3.314
	465	7.978	10	11.64	12.27	15.13	37.48	107.7	106.9	52.17	22.08	21.67	20.79	20.04	20.97	18.76	16.51	15.69	15.71	15.06	15.34	15.43	16.05	16.93	17.74	17.21	16.59	15.18	13.71	13.27	12.83	12.28	12.2	12.68	12.23	11.78	11.42	10.88	10.24	10.47	12.65	13.96	12.33	8.814	6.568	5.435	4.603	3.662	3.214
	470	9.899	7.501	8.251	8.954	11.48	20.79	109.9	187	116.5	34.36	18.43	18.42	17.62	18.36	15.52	15.07	13.27	12.57	13.2	12.89	13.35	14.38	15.5	15.83	15.77	14.89	13.74	12.7	12.42	11.7	11.49	11.37	11.2	11.28	10.89	10.51	10.17	9.49	9.082	9.689	11.59	12.41	10.24	6.943	5.289	4.39	3.672	3.251
	475	6.995	5.892	8.719	9.177	10.08	13.27	81.34	240.5	223.2	83	19.94	16.85	15.95	16.01	13.79	12.21	11.37	11.37	11.88	11.12	12.06	13.03	13.42	13.71	14	13.3	12.76	12.05	11.04	10.75	10.69	10.23	10.63	10.25	10.39	9.948	9.401	8.676	8.25	8.098	8.863	10.44	10.43	8.083	5.673	4.387	3.693	2.921
	480	4.86	6.243	7.454	9.837	10.27	10.21	39.84	216.8	335.2	190.2	38.61	14.87	15.13	13.78	12.81	10.94	10.44	9.673	9.943	9.952	10.5	11.35	12.41	12.9	12.58	12.05	11.83	10.74	10.05	9.96	9.738	9.41	9.893	9.706	9.472	9.199	8.557	8.206	7.593	7.374	7.505	8.182	9.794	8.808	6.462	4.595	3.43	2.841
	485	5.245	6.962	5.193	6.575	8.885	8.39	18.01	138.4	378.3	321.6	104.1	17.88	13.99	13.03	11.45	10.34	9.313	8.813	9.089	9.266	9.5	10.54	11.34	11.46	11.81	10.87	10.73	10.05	9.645	9.112	9.334	9.295	9.303	8.972	8.853	8.822	8.114	7.726	7.179	6.882	6.669	6.602	7.879	8.888	7.649	5.358	3.727	2.797
	490	6.751	6.065	6.204	6.87	8.556	9.835	11.29	57.12	295.4	422.5	217.1	35	12.48	12.28	10.26	9.179	8.17	8.527	8.383	8.489	8.703	10.16	10.22	10.59	10.94	10.28	10.02	9.459	8.987	9.02	8.646	8.888	9.069	8.809	8.85	8.347	7.812	7.583	6.919	6.575	6.402	5.983	6.366	7.48	8.038	6.635	4.307	3.25
	495	5.025	5.24	6.287	5.399	7.129	8.287	11.87	17.83	162.1	438.2	341.4	97.91	13.83	11.29	9.85	8.716	7.973	7.565	7.902	7.606	8.172	8.944	9.384	9.965	10.21	9.651	9.242	8.73	8.33	8.363	8.368	8.528	8.486	8.391	8.461	7.864	7.51	7.193	6.712	6.407	6.026	5.589	5.462	6.14	7.092	7.554	5.312	3.664
	500	6.152	6.079	6.284	6.048	6.384	7.557	11.15	12.13	62.41	320	433.1	211.1	28.98	11.04	9.577	8.313	7.478	7.198	7.255	6.93	8.028	7.94	9.081	9.141	9.197	9.165	8.793	8.25	7.96	7.733	7.967	7.874	8.179	7.949	7.991	7.338	7.333	6.882	6.179	6.053	5.56	5.365	5.215	5.031	5.908	6.927	6.446	4.743
[truncated: 13 more columns]
